# Supplementary material
Source: publisher figshare collection journal article supplement (https://gsajournals.figshare.com/ndownloader/files/25333769)
Supplement: Supplementary file 1 [file 25333769]

## Sheet: Dataset S5
Potential uORFs
uORF ID	Corresponding gene ID	Corresponding gene name	Chromosome	Strand	Start codon	Coordinates	Amino acid sequence	Nucleotide sequence	Ribo 30C mean TPM	Ribo 37C + serum mean TPM
C1_00070W_A-T_13702_13761_60	C1_00070W_A	MVD	Ca22chr1A_C_albicans_SC5314	+	GTG	13702-13761	VCSIYICEKKKHHQKKKFFS	GTGTGTAGTATATATATATGTGAGAAAAAAAAACACCACCAAAAAAAAAAATTTTTTTCG	5.46767	16.844
C1_00450C_A-T_73160_73333_174	C1_00450C_A	C1_00450C_A	Ca22chr1A_C_albicans_SC5314	-	ATA	73160-73333	ILINTLFVAKNNTTTSSWVQMGPNQKQKCLLQILQSTLVPHSYHNWNLLLKYVPKKNI	ATATTGATTAATACCCTTTTTGTTGCTAAAAATAATACTACTACTTCATCATGGGTGCAAATGGGTCCAAACCAGAAACAAAAGTGTTTACTCCAGATACTCCAATCGACTTTAGTGCCACATTCTTATCACAATTGGAATCTTCTCCTGAAGTATGTCCCCAAAAAAAATATT	21.6133	26.22
C1_00450C_A-T_73222_73323_102	C1_00450C_A	C1_00450C_A	Ca22chr1A_C_albicans_SC5314	-	ATA	73222-73323	IPFLLLKIILLLHHGCKWVQTRNKSVYSRYSNRL	ATACCCTTTTTGTTGCTAAAAATAATACTACTACTTCATCATGGGTGCAAATGGGTCCAAACCAGAAACAAAAGTGTTTACTCCAGATACTCCAATCGACTT	18.1103	30.0407
C1_00450C_A-T_73134_73286_153	C1_00450C_A	C1_00450C_A	Ca22chr1A_C_albicans_SC5314	-	ATC	73134-73286	IMGANGSKPETKVFTPDTPIDFSATFLSQLESSPEVCPQKKYLTLKIVETR	ATCATGGGTGCAAATGGGTCCAAACCAGAAACAAAAGTGTTTACTCCAGATACTCCAATCGACTTTAGTGCCACATTCTTATCACAATTGGAATCTTCTCCTGAAGTATGTCCCCAAAAAAAATATTTGACTTTGAAGATTGTCGAAACCAGA	24.3453	29.5037
C1_00640C_A-T_111039_111101_63	C1_00640C_A	RPO41	Ca22chr1A_C_albicans_SC5314	-	ATA	111039-111101	IIFVYHLATEVSTTKHILNTI	ATAATCTTTGTATATCACCTTGCAACAGAAGTGTCAACAACCAAACATATATTAAATACAATC	12.145	29.22
C1_00710C_A-T_125480_125587_108	C1_00710C_A	TUB2	Ca22chr1A_C_albicans_SC5314	-	TTG	125480-125587	LYVPFIPFLTPNHWNPYVFCCCCLKIFGSVLRAFFD	TTGTATGTTCCGTTTATTCCCTTCCTTACACCAAATCATTGGAATCCTTATGTGTTTTGTTGTTGTTGTCTGAAAATTTTTGGTTCTGTTTTACGCGCCTTTTTCGAC	0	4.682
C1_00710C_A-T_125518_125583_66	C1_00710C_A	TUB2	Ca22chr1A_C_albicans_SC5314	-	ATG	125518-125583	MFRLFPSLHQIIGILMCFVVVV	ATGTTCCGTTTATTCCCTTCCTTACACCAAATCATTGGAATCCTTATGTGTTTTGTTGTTGTTGTC	0	5.12733
C1_00710C_A-T_125281_125370_90	C1_00710C_A	TUB2	Ca22chr1A_C_albicans_SC5314	-	ATT	125281-125370	IHLSTGQCGNQIVCINTEEKKILSLLCCDL	ATTCATTTATCAACTGGTCAATGTGGTAATCAAATTGTATGTATAAACACTGAAGAAAAAAAAATTCTATCATTGTTATGTTGTGATCTT	2.60567	17.2763
C1_00710C_A-T_125475_125597_123	C1_00710C_A	TUB2	Ca22chr1A_C_albicans_SC5314	-	ATG	125475-125597	MREIVCSVYSLPYTKSLESLCVLLLLSENFWFCFTRLFRLN	ATGAGAGAAATTGTATGTTCCGTTTATTCCCTTCCTTACACCAAATCATTGGAATCCTTATGTGTTTTGTTGTTGTTGTCTGAAAATTTTTGGTTCTGTTTTACGCGCCTTTTTCGACTAAAT	17.956	10.9597
C1_00710C_A-T_125328_125399_72	C1_00710C_A	TUB2	Ca22chr1A_C_albicans_SC5314	-	ATA	125328-125399	ILTAFALFFRFIYQLVNVVIKLYV	ATACTAACTGCTTTTGCCCTTTTTTTTAGATTCATTTATCAACTGGTCAATGTGGTAATCAAATTGTATGTA	3.257	19.022
C1_00730C_A-T_128723_128905_183	C1_00730C_A	CMP1	Ca22chr1A_C_albicans_SC5314	-	ATT	128723-128905	ITITTHINRVHEIFEIKKFFFLLLWLLFNVVIFLFDLKLPPIVITPLPLLKKFINFQQINH	ATTACTATTACGACACACATCAACAGAGTACACGAAATATTTGAGATAAAGAAATTTTTCTTTTTACTACTTTGGTTACTTTTCAACGTTGTTATTTTTTTATTTGATTTAAAATTACCACCTATAGTTATTACCCCTTTACCCCTTCTCAAGAAGTTCATTAATTTCCAACAAATCAATCAT	0.196	1.82533
C1_00730C_A-T_128652_128717_66	C1_00730C_A	CMP1	Ca22chr1A_C_albicans_SC5314	-	ATA	128652-128717	IFDPLPCSSPFPTPFAQQLLNI	ATATTTGATCCTCTGCCCTGCTCCTCCCCGTTTCCTACTCCGTTTGCTCAACAACTTTTAAATATT	14.9227	80.6647
C1_00740C_A-T_130735_130803_69	C1_00740C_A	SPE1	Ca22chr1A_C_albicans_SC5314	-	ATT	130735-130803	INLIIPSTTLSSVVVKKKRSERN	ATTAATTTAATTATACCATCAACTACTTTATCAAGTGTTGTGGTTAAAAAAAAAAGAAGTGAAAGAAAC	0.52	12.069
C1_00740C_B-T_130729_130803_75	C1_00740C_B	C1_00740C_B	Ca22chr1B_C_albicans_SC5314	-	ATT	130729-130803	INLIIPSTTLSSVVVKKKEVKETEK	ATTAATTTAATTATACCATCAACTACTTTATCAAGTGTTGTGGTTAAAAAAAAAGAAGTGAAAGAAACTGAAAAG	12.6203	1.77867
C1_00770C_A-T_136462_136680_219	C1_00770C_A	ROT1	Ca22chr1A_C_albicans_SC5314	-	AAG	136462-136680	KKQKARKKERIYSCISPFNKAYLLNNIYLLFYCQEISSILSLRKLNKNHPHTTTHFYQLFINFTYTDLTHQHH	AAGAAACAGAAAGCAAGAAAGAAAGAAAGAATCTATAGTTGCATCAGTCCATTTAACAAGGCTTATTTATTGAATAATATATATTTGCTTTTTTATTGTCAAGAAATTTCAAGTATCCTAAGTTTGAGAAAATTGAATAAAAATCATCCACATACAACAACACACTTTTATCAACTATTTATAAATTTTACATACACTGATTTAACACACCAACACCAC	7.16867	26.8563
C1_00770C_A-T_136611_136739_129	C1_00770C_A	ROT1	Ca22chr1A_C_albicans_SC5314	-	CTG	136611-136739	LFIAIISLAIIDFSFFFSNKRNRKQERKKESIVASVHLTRLIY	CTGTTTATTGCTATTATATCTCTTGCTATTATTGATTTTTCATTTTTTTTTTCTAACAAAAGAAACAGAAAGCAAGAAAGAAAGAAAGAATCTATAGTTGCATCAGTCCATTTAACAAGGCTTATTTAT	11.3363	44.2397
C1_00770C_A-T_136646_136732_87	C1_00770C_A	ROT1	Ca22chr1A_C_albicans_SC5314	-	TTG	136646-136732	LLLYLLLLLIFHFFFLTKETESKKERKNL	TTGCTATTATATCTCTTGCTATTATTGATTTTTCATTTTTTTTTTCTAACAAAAGAAACAGAAAGCAAGAAAGAAAGAAAGAATCTA	16.0797	9.79867
C1_00780C_A-T_141619_141684_66	C1_00780C_A	HGC1	Ca22chr1A_C_albicans_SC5314	-	ATA	141619-141684	ISIVINSRITTTTTRTTISILV	ATATCAATAGTTATTAATTCAAGGATAACAACAACTACTACTAGAACAACCATTTCAATTCTTGTT	1.37867	2.41433
C1_00780C_A-T_141493_141591_99	C1_00780C_A	HGC1	Ca22chr1A_C_albicans_SC5314	-	AAG	141493-141591	KKSPNKISERNSVLLPSKFLTTTSNKNPNYTSQ	AAGAAGAGTCCAAACAAAATCTCAGAGAGAAATTCTGTCCTCCTCCCCTCAAAGTTTCTAACAACCACAAGTAACAAAAACCCAAACTATACTTCCCAA	0	5.722
C1_00780C_A-T_141340_141444_105	C1_00780C_A	HGC1	Ca22chr1A_C_albicans_SC5314	-	ATC	141340-141444	ISNFPFNNLVLIEKDSIQFNSIQFNSIQFNSIQFK	ATCTCTAATTTTCCCTTCAATAACTTAGTGTTGATAGAAAAAGATTCAATTCAATTCAATTCAATTCAATTCAATTCAATTCAATTCAATTCAATTCAATTCAAA	0	12.36
C1_00780C_A-T_141043_141174_132	C1_00780C_A	HGC1	Ca22chr1A_C_albicans_SC5314	-	ACG	141043-141174	TDTTLYTLNITYSTLSINFEFGVPYVKLLSTTTTTTTTTTANYI	ACGGATACTACACTATACACACTTAACATAACATACTCAACGTTAAGTATTAATTTTGAATTTGGTGTTCCTTACGTAAAATTACTATCAACTACAACAACAACAACAACAACAACGACAGCTAACTATATT	0	3.28833
C1_00840C_A-T_162784_162849_66	C1_00840C_A	NRM1	Ca22chr1A_C_albicans_SC5314	-	CTG	162784-162849	LLFLLLHLLLLTFPPHPPHHFN	CTGTTGTTTCTTCTTCTACATCTTCTTCTTCTAACGTTTCCACCACACCCACCACACCACTTCAAT	79.9507	1.516
C1_00840C_A-T_162755_162853_99	C1_00840C_A	NRM1	Ca22chr1A_C_albicans_SC5314	-	TTG	162755-162853	LTVVSSSTSSSSNVSTTPTTPLQLIHIYTSIEV	TTGACTGTTGTTTCTTCTTCTACATCTTCTTCTTCTAACGTTTCCACCACACCCACCACACCACTTCAATTAATACACATTTACACGTCAATTGAAGTG	60.8093	2.90933
C1_00930C_A-T_189936_190202_267	C1_00930C_A	SIN3	Ca22chr1A_C_albicans_SC5314	-	ATA	189936-190202	IQITFSISSPVQKDFERVLMSNHQEPWNNQQRPLGQPFKYVSIFCIVYPHRFVLYTNIILFFFSRQHPPVLPPPATLEQGMFLKCLFNT	ATACAAATCACATTTTCAATCTCCTCCCCCGTTCAAAAAGATTTTGAAAGAGTCTTAATGTCGAATCATCAGGAACCTTGGAACAACCAACAGCGACCACTTGGCCAGCCTTTCAAGTATGTTTCTATATTTTGTATTGTTTATCCCCATCGATTTGTTTTGTATACTAACATCATACTGTTTTTTTTTAGTCGTCAACATCCCCCAGTATTACCACCACCAGCAACGTTGGAGCAAGGTATGTTTTTGAAATGCCTTTTTAATACT	10.785	10.367
C1_00930C_A-T_189801_189908_108	C1_00930C_A	SIN3	Ca22chr1A_C_albicans_SC5314	-	ATT	189801-189908	INRRASILSLTKFTKFGQWQWPPSTWVQHPIDQSCK	ATTAATAGGCGGGCAAGCATTTTATCCCTTACCAAGTTTACCAAGTTTGGGCAATGGCAGTGGCCACCATCCACATGGGTTCAACATCCCATCGATCAATCCTGCAAG	25.2327	7.59867
C1_00930C_A-T_189711_189776_66	C1_00930C_A	SIN3	Ca22chr1A_C_albicans_SC5314	-	ATG	189711-189776	MYFETSFWCYLKEYNNKQNNPY	ATGTATTTTGAAACCAGCTTTTGGTGTTATTTAAAAGAATATAACAACAAACAGAACAACCCATAC	1.25233	2.74367
C1_00930C_A-T_189462_189632_171	C1_00930C_A	SIN3	Ca22chr1A_C_albicans_SC5314	-	ATC	189462-189632	IHHKQLIQLISHHPVLWDMLAMNKVHIPQPFHNQLHKHLLLLEGFLIGLLLQTCTGH	ATCCACCACAAACAACTAATTCAACTCATCTCCCACCACCCAGTTCTTTGGGACATGTTGGCAATGAACAAGGTGCATATCCCCCAACCATTTCACAACCAGCTCCACAAGCATCTCCTGTTATTGGAGGGGTTCCTAATCGGTCTACTACTACAAACGTGTACAGGCCAT	12.803	17.6787
C1_00930C_A-T_189372_189431_60	C1_00930C_A	SIN3	Ca22chr1A_C_albicans_SC5314	-	ATC	189372-189431	IRSKYNSATKLRYIITFLIL	ATCAGGTCAAAGTACAATTCAGCAACCAAGCTGAGGTATATAATAACTTTCTTGATATTA	6.70667	2.956
C1_00930C_A-T_189956_190138_183	C1_00930C_A	SIN3	Ca22chr1A_C_albicans_SC5314	-	ATC	189956-190138	IIRNLGTTNSDHLASLSSMFLYFVLFIPIDLFCILTSYCFFLVVNIPQYYHHQQRWSKVCF	ATCATCAGGAACCTTGGAACAACCAACAGCGACCACTTGGCCAGCCTTTCAAGTATGTTTCTATATTTTGTATTGTTTATCCCCATCGATTTGTTTTGTATACTAACATCATACTGTTTTTTTTTAGTCGTCAACATCCCCCAGTATTACCACCACCAGCAACGTTGGAGCAAGGTATGTTTT	14.8323	10.7417
C1_00930C_A-T_189746_189940_195	C1_00930C_A	SIN3	Ca22chr1A_C_albicans_SC5314	-	ATA	189746-189940	ILKEKRGTNQLLIGGQAFYPLPSLPSLGNGSGHHPHGFNIPSINPASDQIQMGQVCILKPAFGVI	ATACTTAAAGAGAAAAGAGGTACTAACCAGTTATTAATAGGCGGGCAAGCATTTTATCCCTTACCAAGTTTACCAAGTTTGGGCAATGGCAGTGGCCACCATCCACATGGGTTCAACATCCCATCGATCAATCCTGCAAGTGATCAGATACAGATGGGACAAGTATGTATTTTGAAACCAGCTTTTGGTGTTATT	21.9827	7.71967
C1_00930C_A-T_189647_189742_96	C1_00930C_A	SIN3	Ca22chr1A_C_albicans_SC5314	-	AAG	189647-189742	KNITTNRTTHTNSSCLVTIRSIKTDSRIEKTF	AAGAATATAACAACAAACAGAACAACCCATACTAACTCCAGTTGTTTAGTCACCATCCGATCAATCAAGACAGACAGCAGAATTGAGAAGACCTTC	27.1387	5.61467
C1_00930C_A-T_189497_189562_66	C1_00930C_A	SIN3	Ca22chr1A_C_albicans_SC5314	-	AGG	189497-189562	RCISPNHFTTSSTSISCYWRGS	AGGTGCATATCCCCCAACCATTTCACAACCAGCTCCACAAGCATCTCCTGTTATTGGAGGGGTTCC	11.2633	2.23067
C1_00930C_A-T_189401_189463_63	C1_00930C_A	SIN3	Ca22chr1A_C_albicans_SC5314	-	ATT	189401-189463	IKCQGRVILFRSGQSTIQQPS	ATTAAATGTCAAGGACGCGTTATCCTATTTAGATCAGGTCAAAGTACAATTCAGCAACCAAGC	4.82633	15.577
C1_00930C_A-T_190036_190155_120	C1_00930C_A	SIN3	Ca22chr1A_C_albicans_SC5314	-	AAG	190036-190155	KSLNVESSGTLEQPTATTWPAFQVCFYILYCLSPSICFVY	AAGAGTCTTAATGTCGAATCATCAGGAACCTTGGAACAACCAACAGCGACCACTTGGCCAGCCTTTCAAGTATGTTTCTATATTTTGTATTGTTTATCCCCATCGATTTGTTTTGTATAC	23.4687	11.1383
C1_00930C_A-T_189769_189894_126	C1_00930C_A	SIN3	Ca22chr1A_C_albicans_SC5314	-	AAG	189769-189894	KHFIPYQVYQVWAMAVATIHMGSTSHRSILQVIRYRWDKYVF	AAGCATTTTATCCCTTACCAAGTTTACCAAGTTTGGGCAATGGCAGTGGCCACCATCCACATGGGTTCAACATCCCATCGATCAATCCTGCAAGTGATCAGATACAGATGGGACAAGTATGTATTT	34.0203	11.918
C1_00930C_B-T_189507_189572_66	C1_00930C_B	C1_00930C_B	Ca22chr1B_C_albicans_SC5314	-	AGG	189507-189572	RCISPNDFTTSSTSISRYWRGS	AGGTGCATATCCCCCAACGATTTCACAACCAGCTCCACAAGCATCTCCCGTTATTGGAGGGGTTCC	2.50467	6.29867
C1_00930C_B-T_189472_189642_171	C1_00930C_B	C1_00930C_B	Ca22chr1B_C_albicans_SC5314	-	ATC	189472-189642	IHHKQLIQLISHHLALWDMLAMNKVHIPQRFHNQLHKHLPLLEGFLIGLLLQTCTGH	ATCCACCACAAACAACTAATTCAACTCATCTCCCACCACCTAGCTCTTTGGGACATGTTGGCAATGAACAAGGTGCATATCCCCCAACGATTTCACAACCAGCTCCACAAGCATCTCCCGTTATTGGAGGGGTTCCTAATCGGTCTACTACTACAAACGTGTACAGGCCAT	0.966667	5.274
C1_01040W_A-T_206287_206352_66	C1_01040W_A	C1_01040W_A	Ca22chr1A_C_albicans_SC5314	+	TTG	206287-206352	LVFVMCRLVYPYYISPQSLKCL	TTGGTGTTCGTAATGTGTAGACTGGTATATCCCTATTATATTTCTCCCCAAAGCCTAAAATGTTTA	2.21367	8.59067
C1_01370C_A-T_269630_269728_99	C1_01370C_A	RPS21B	Ca22chr1A_C_albicans_SC5314	-	ATT	269630-269728	IFVKRKLQRRNIRHLSQTYTGWKFKTLVKELSY	ATTTTCGTGAAAAGAAAACTTCAAAGGCGTAACATAAGACACTTATCCCAGACTTACACAGGGTGGAAGTTTAAAACCCTCGTGAAGGAATTAAGTTAC	0.362333	2.10133
C1_01370C_A-T_269923_270015_93	C1_01370C_A	RPS21B	Ca22chr1A_C_albicans_SC5314	-	AAG	269923-270015	KMENDKGQLVCKSILSHCVRRECSCEPGQQI	AAGATGGAAAACGATAAAGGTCAATTAGTATGTAAATCAATATTGTCACACTGTGTGAGAAGAGAGTGTTCATGTGAACCAGGGCAGCAAATT	429.145	375.877
C1_01590C_A-T_323388_323453_66	C1_01590C_A	C1_01590C_A	Ca22chr1A_C_albicans_SC5314	-	AGG	323388-323453	RQLTSYLPFNQPCTTFYSSLQD	AGGCAGCTTACTTCATATTTGCCATTCAATCAACCTTGCACCACCTTCTACTCCTCCCTTCAAGAT	4.22267	9.27967
C1_01650W_A-T_334566_334637_72	C1_01650W_A	ISN1	Ca22chr1A_C_albicans_SC5314	+	ATT	334566-334637	IIIYQTPSYTHFRIERSKKTTTFS	ATTATAATTTATCAAACTCCGTCTTACACACATTTTCGAATAGAGCGATCCAAAAAGACAACCACATTTTCC	1.909	7.884
C1_01710W_A-T_350947_351060_114	C1_01710W_A	C1_01710W_A	Ca22chr1A_C_albicans_SC5314	+	ATC	350947-351060	IFNLLPSTTHLSSSSFYLLPSNSIPNYLLNYLIHLFYQ	ATCTTTAACTTACTACCCAGTACTACTCACCTTTCTTCTTCTTCCTTCTACCTTCTACCTTCCAATTCCATTCCAAACTACTTACTCAACTATTTGATCCACTTATTTTACCAA	1.76467	29.056
C1_01830C_A-T_380860_380994_135	C1_01830C_A	UBC8	Ca22chr1A_C_albicans_SC5314	-	ATA	380860-380994	IDNFQRIIFRQIILICLKFVLHSDSSCLPTFKKINSNRKSRPCPI	ATAGACAACTTTCAAAGAATAATTTTTAGACAAATAATACTAATTTGCCTCAAATTTGTTTTACATTCTGATTCCTCCTGTTTGCCTACCTTCAAGAAGATCAACTCAAACAGAAAGTCAAGACCGTGTCCAATT	2.88133	9.50433
C1_01830C_A-T_380847_380939_93	C1_01830C_A	UBC8	Ca22chr1A_C_albicans_SC5314	-	TTG	380847-380939	LFYILIPPVCLPSRRSTQTESQDRVQFNYTV	TTGTTTTACATTCTGATTCCTCCTGTTTGCCTACCTTCAAGAAGATCAACTCAAACAGAAAGTCAAGACCGTGTCCAATTTAATTATACAGTT	4.18267	13.3183
C1_01830C_A-T_380837_380917_81	C1_01830C_A	UBC8	Ca22chr1A_C_albicans_SC5314	-	CTG	380837-380917	LFAYLQEDQLKQKVKTVSNLIIQFNLT	CTGTTTGCCTACCTTCAAGAAGATCAACTCAAACAGAAAGTCAAGACCGTGTCCAATTTAATTATACAGTTTAATTTAACT	1.36067	14.1933
C1_02050C_A-T_423903_423965_63	C1_02050C_A	PHO91	Ca22chr1A_C_albicans_SC5314	-	ATA	423903-423965	ITGNNISYTYSSPFLAKSMLI	ATAACTGGAAACAACATTTCATATACATACAGTTCACCTTTTTTGGCCAAGTCTATGCTCATT	2.787	1.353
C1_02050C_A-T_423887_423961_75	C1_02050C_A	PHO91	Ca22chr1A_C_albicans_SC5314	-	CTG	423887-423961	LETTFHIHTVHLFWPSLCSFKENIK	CTGGAAACAACATTTCATATACATACAGTTCACCTTTTTTGGCCAAGTCTATGCTCATTTAAAGAGAACATCAAG	3.81067	17.422
C1_02050C_A-T_423877_423972_96	C1_02050C_A	PHO91	Ca22chr1A_C_albicans_SC5314	-	TTG	423877-423972	LVYNWKQHFIYIQFTFFGQVYAHLKRTSSKLD	TTGGTATATAACTGGAAACAACATTTCATATACATACAGTTCACCTTTTTTGGCCAAGTCTATGCTCATTTAAAGAGAACATCAAGTAAACTAGAC	3.264	66.057
C1_02230W_A-T_465123_465191_69	C1_02230W_A	SEP7	Ca22chr1A_C_albicans_SC5314	+	ATA	465123-465191	ITDNNKQLSIITTITITISFFLQ	ATAACAGACAACAACAAACAACTTTCAATTATTACTACTATTACTATTACTATATCATTCTTCCTTCAG	3.15733	0.483333
C1_02230W_A-T_465408_465623_216	C1_02230W_A	SEP7	Ca22chr1A_C_albicans_SC5314	+	ATA	465408-465623	IKGKQLFIIAIDFNKEHRNFFTRVIIYIYIIILAFIPTPQLTSKSKKKARQQVPHFSFSFSFIIFPSKELVV	ATAAAAGGGAAACAATTATTTATTATTGCCATTGATTTTAATAAAGAACATAGGAATTTTTTTACCCGTGTCATTATATATATATATATTATAATACTTGCTTTCATTCCCACCCCCCAATTGACGAGTAAATCAAAAAAAAAAGCAAGACAACAGGTTCCCCATTTTAGTTTTAGTTTTAGTTTTATTATTTTTCCTTCAAAAGAATTAGTTGTA	6.57933	6.52867
C1_02230W_A-T_465092_465277_186	C1_02230W_A	SEP7	Ca22chr1A_C_albicans_SC5314	+	ATA	465092-465277	ITKKPTTTTTNNRQQQTTFNYYYYYYYYIILPSVVYSSFNVFIIIIITTIISILVLFFGLVL	ATAACAAAAAAACCCACCACCACTACCACCAATAACAGACAACAACAAACAACTTTCAATTATTACTACTATTACTATTACTATATCATTCTTCCTTCAGTAGTATATTCATCCTTTAACGTTTTTATTATTATTATTATTACTACTATTATTTCAATTTTAGTCCTTTTTTTTGGTTTAGTTTTA	1.36433	0.697333
C1_02230W_B-T_465135_465203_69	C1_02230W_B	C1_02230W_B	Ca22chr1B_C_albicans_SC5314	+	ATA	465135-465203	ITDNNRQLSIITTITITISFFLQ	ATAACAGACAACAACAGACAACTTTCAATTATTACTACTATTACTATTACTATATCATTCTTTCTTCAG	2.396	8.77367
C1_02240W_A-T_468961_469050_90	C1_02240W_A	C1_02240W_A	Ca22chr1A_C_albicans_SC5314	+	ATT	468961-469050	IQTQLITTTTTAVIYIYIFKRTIEAYSHQY	ATTCAAACTCAATTAATTACAACAACAACAACAGCAGTTATATATATATATATATTTAAAAGGACCATAGAAGCATATTCCCATCAATAC	10.5787	2.712
C1_02240W_A-T_469031_469108_78	C1_02240W_A	C1_02240W_A	Ca22chr1A_C_albicans_SC5314	+	AAG	469031-469108	KHIPINTSLFFFLFSIYFLIFNFILF	AAGCATATTCCCATCAATACTAGTCTTTTTTTTTTTCTTTTCTCAATTTACTTTCTGATTTTTAATTTTATTTTATTT	12.206	2.987
C1_02240W_A-T_469020_469085_66	C1_02240W_A	C1_02240W_A	Ca22chr1A_C_albicans_SC5314	+	AAG	469020-469085	KDHRSIFPSILVFFFFFSQFTF	AAGGACCATAGAAGCATATTCCCATCAATACTAGTCTTTTTTTTTTTCTTTTCTCAATTTACTTTC	14.4253	3.36133
C1_02250W_A-T_474445_474570_126	C1_02250W_A	CWH8	Ca22chr1A_C_albicans_SC5314	+	AGG	474445-474570	RAIEYKTRQNKTRQSLLLGYSFFKIDRLFVVVVPKLYFTSLA	AGGGCAATAGAATACAAGACAAGACAAAATAAAACAAGGCAATCATTATTACTCGGATATTCTTTCTTTAAAATTGATCGGTTGTTTGTCGTCGTCGTTCCTAAACTTTACTTTACATCCCTTGCT	5.068	18.7047
C1_02330C_A-T_488138_488209_72	C1_02330C_A	C1_02330C_A	Ca22chr1A_C_albicans_SC5314	-	ATA	488138-488209	IIIKNGQDQSRYEIDIQLDMEKGR	ATAATCATCAAAAATGGCCAAGATCAGTCAAGGTATGAAATAGATATTCAATTAGATATGGAGAAAGGAAGA	843.708	436.463
C1_02330C_A-T_487913_487975_63	C1_02330C_A	C1_02330C_A	Ca22chr1A_C_albicans_SC5314	-	AGG	487913-487975	RYNDFTIYLNIKNILNIEFQY	AGGTATAATGATTTCACGATTTACCTGAATATAAAGAACATCCTTAATATTGAATTTCAATAT	1.007	2.82333
C1_02530C_A-T_534167_534226_60	C1_02530C_A	DIP5	Ca22chr1A_C_albicans_SC5314	-	ATC	534167-534226	IIIINFIFNLSIINISYYFC	ATCATAATTATAAATTTCATTTTCAATCTTTCCATAATCAACATCTCCTACTACTTTTGT	34.4523	4.16633
C1_02990C_A-T_623846_623956_111	C1_02990C_A	XOG1	Ca22chr1A_C_albicans_SC5314	-	ATT	623846-623956	IQICFLFFLAHICTLISLLKLHWKLHSKTSNDNFLQV	ATTCAGATTTGTTTCCTTTTTTTTTTGGCACATATTTGTACACTAATAAGTTTACTAAAACTACACTGGAAACTACATTCAAAAACATCAAACGACAACTTCTTGCAGGTA	0	2.82867
C1_02990C_A-T_623713_623880_168	C1_02990C_A	XOG1	Ca22chr1A_C_albicans_SC5314	-	ATT	623713-623880	IQKHQTTTSCRYNNKRKTKSLAIYIQKYKKKKRINILHQILNNLPILSFFFYPPQY	ATTCAAAAACATCAAACGACAACTTCTTGCAGGTATAACAATAAAAGAAAGACCAAGTCGCTTGCAATTTATATTCAAAAATACAAAAAAAAGAAAAGAATTAATATATTGCACCAGATCTTGAATAATTTACCTATTCTTTCTTTCTTTTTTTACCCACCACAATAT	0.829667	2.11133
C1_02990C_A-T_623760_623969_210	C1_02990C_A	XOG1	Ca22chr1A_C_albicans_SC5314	-	ATT	623760-623969	IYSLNSDLFPFFFGTYLYTNKFTKTTLETTFKNIKRQLLAGITIKERPSRLQFIFKNTKKRKELIYCTRS	ATTTACTCATTAAATTCAGATTTGTTTCCTTTTTTTTTTGGCACATATTTGTACACTAATAAGTTTACTAAAACTACACTGGAAACTACATTCAAAAACATCAAACGACAACTTCTTGCAGGTATAACAATAAAAGAAAGACCAAGTCGCTTGCAATTTATATTCAAAAATACAAAAAAAAGAAAAGAATTAATATATTGCACCAGATCT	0.663667	2.095
C1_03130C_A-T_655208_655282_75	C1_03130C_A	GGA2	Ca22chr1A_C_albicans_SC5314	-	ATC	655208-655282	IQFLNQKTKKSIFTSTKYKYPTDHY	ATCCAATTCTTGAACCAAAAGACAAAGAAATCGATATTCACATCGACAAAATACAAGTATCCAACCGATCATTAT	2.939	8.364
C1_03130C_A-T_655321_655401_81	C1_03130C_A	GGA2	Ca22chr1A_C_albicans_SC5314	-	TTG	655321-655401	LSTLPTDSIFNSFSTIEEAIDIAFLTF	TTGTCAACCCTACCAACTGATTCTATATTCAATTCATTCTCAACTATCGAGGAAGCTATTGATATTGCTTTTTTGACATTC	15.5987	2.693
C1_03190C_A-T_664247_664342_96	C1_03190C_A	ECM33	Ca22chr1A_C_albicans_SC5314	-	ATT	664247-664342	ITMQFKNILAITAIAGLASAANSMYYNYYNYY	ATTACAATGCAATTCAAGAACATTCTTGCTATTACTGCCATTGCTGGCTTAGCTTCTGCAGCCAACAGTATGTATTATAATTATTACAATTATTAC	33.166	61.7087
C1_03190C_A-T_663545_663616_72	C1_03190C_A	ECM33	Ca22chr1A_C_albicans_SC5314	-	GTG	663545-663616	VRGQQVAPKKILFIYFQFLRFCPF	GTGAGAGGACAACAAGTGGCACCAAAAAAAATCTTATTTATTTATTTCCAGTTTTTGAGATTTTGTCCATTT	0.382667	2.309
C1_03190C_A-T_664213_664287_75	C1_03190C_A	ECM33	Ca22chr1A_C_albicans_SC5314	-	CTG	664213-664287	LQPTVCIIIITIITNFLVVEFHYSF	CTGCAGCCAACAGTATGTATTATAATTATTACAATTATTACTAATTTTTTAGTTGTTGAATTTCATTACAGTTTT	12.7287	47.945
C1_03190C_A-T_664266_664373_108	C1_03190C_A	ECM33	Ca22chr1A_C_albicans_SC5314	-	TTG	664266-664373	LIYITTSYKLDYNAIQEHSCYYCHCWLSFCSQQYVL	TTGATTTATATAACTACTTCATATAAATTAGATTACAATGCAATTCAAGAACATTCTTGCTATTACTGCCATTGCTGGCTTAGCTTCTGCAGCCAACAGTATGTATTA	30.478	57.117
C1_03190C_B-T_664285_664380_96	C1_03190C_B	C1_03190C_B	Ca22chr1B_C_albicans_SC5314	-	ATT	664285-664380	ITMQFKNILAITAIAGLASAANSMYYNYYNYY	ATTACAATGCAATTCAAGAACATTCTTGCTATTACTGCCATTGCTGGCTTAGCTTCTGCTGCCAACAGTATGTATTATAATTATTACAATTATTAC	7.105	15.249
C1_03190C_B-T_664251_664325_75	C1_03190C_B	C1_03190C_B	Ca22chr1B_C_albicans_SC5314	-	CTG	664251-664325	LLPTVCIIIITIITNFLVVEFHYSF	CTGCTGCCAACAGTATGTATTATAATTATTACAATTATTACTAATTTTTTAGTTGTTGAATTTCATTACAGTTTT	5.151	6.07067
C1_03190C_B-T_664304_664411_108	C1_03190C_B	C1_03190C_B	Ca22chr1B_C_albicans_SC5314	-	TTG	664304-664411	LIYITTSYKLDYNAIQEHSCYYCHCWLSFCCQQYVL	TTGATTTATATAACTACTTCATATAAATTAGATTACAATGCAATTCAAGAACATTCTTGCTATTACTGCCATTGCTGGCTTAGCTTCTGCTGCCAACAGTATGTATTA	6.31567	13.5547
C1_03220C_A-T_675871_675963_93	C1_03220C_A	BMH1	Ca22chr1A_C_albicans_SC5314	-	ATG	675871-675963	MNLVLSEEIHLKLQSKTSKYQYYSSKKEQKL	ATGAATTTAGTTTTATCTGAAGAAATACATCTCAAGTTACAGTCAAAAACATCTAAATACCAGTATTACTCATCAAAAAAAGAACAAAAATTA	29.0357	26.7943
C1_03360W_A-T_701370_701492_123	C1_03360W_A	C1_03360W_A	Ca22chr1A_C_albicans_SC5314	+	AAG	701370-701492	KLLCIIIRGNFRVIVYHQYLFSFLKKKIVYFQPINQVDIVK	AAGTTGTTGTGTATAATAATTAGGGGTAATTTCAGAGTAATTGTTTATCATCAGTATTTGTTTTCTTTTTTAAAAAAAAAAATAGTATATTTCCAACCAATCAATCAAGTTGATATTGTGAAG	2.464	76.1177
C1_03360W_A-T_701595_701696_102	C1_03360W_A	C1_03360W_A	Ca22chr1A_C_albicans_SC5314	+	CTG	701595-701696	LLLYIIKQYIFTRLSTGSYSRLPIFPYQEQLLLR	CTGCTACTGTACATTATAAAACAGTACATATTTACGAGGCTTTCCACGGGTTCCTATTCTAGGCTACCAATATTTCCTTATCAAGAACAGTTATTGCTAAGA	1.514	2.652
C1_03360W_A-T_701282_701356_75	C1_03360W_A	C1_03360W_A	Ca22chr1A_C_albicans_SC5314	+	ATC	701282-701356	INTAIIHIDNPLLVFSFFFTNSNNS	ATCAATACTGCAATCATTCATATTGATAATCCCCTGTTGGTATTTAGTTTTTTTTTTACTAATTCAAACAACAGT	1.213	1.48233
C1_03400W_A-T_715347_715415_69	C1_03400W_A	C1_03400W_A	Ca22chr1A_C_albicans_SC5314	+	TTG	715347-715415	LIRFSSCCSSLGNFFYSLKSAFN	TTGATTCGGTTTTCTTCTTGTTGTTCTTCTTTGGGCAATTTCTTCTACTCTCTGAAATCAGCATTTAAC	0.919333	1.55733
C1_03400W_A-T_715428_715499_72	C1_03400W_A	C1_03400W_A	Ca22chr1A_C_albicans_SC5314	+	AAG	715428-715499	KKKNTANNLNDDSIYDEINKKSII	AAGAAGAAAAACACAGCAAACAACCTCAACGACGATTCAATCTATGACGAAATTAATAAAAAGTCAATAATT	0	5.28033
C1_03620C_A-T_751941_752024_84	C1_03620C_A	C1_03620C_A	Ca22chr1A_C_albicans_SC5314	-	ATC	751941-752024	IFKGYYQIFNCYAKAWYVFFFWKHWTII	ATCTTCAAAGGTTATTATCAAATTTTTAACTGTTATGCAAAAGCATGGTATGTATTTTTTTTTTGGAAACATTGGACAATTATT	67.3497	56.7423
C1_03620C_A-T_751860_751934_75	C1_03620C_A	C1_03620C_A	Ca22chr1A_C_albicans_SC5314	-	AAG	751860-751934	KNSIHFLFIFFPPELITGWLDRCFE	AAGAATTCTATTCACTTTTTATTTATTTTTTTTCCACCCGAATTGATAACTGGATGGCTTGATCGGTGTTTTGAA	611.021	970.435
C1_03620C_A-T_751719_751826_108	C1_03620C_A	C1_03620C_A	Ca22chr1A_C_albicans_SC5314	-	ATT	751719-751826	IRNNKPGNASYTMDNISIVSIVYFSCTSLYYFFVLV	ATTCGGAATAACAAACCGGGAAATGCTTCTTACACGATGGATAACATTTCAATTGTATCGATCGTTTACTTTTCCTGTACATCTTTATACTATTTTTTTGTTCTAGTT	10926.1	2975.36
C1_03620C_A-T_751937_752110_174	C1_03620C_A	C1_03620C_A	Ca22chr1A_C_albicans_SC5314	-	ATG	751937-752110	MTRTSVLADALNAINNAEKTGKRQVLIRPSSKVIIKFLTVMQKHGMYFFFGNIGQLFD	ATGACTAGAACCTCCGTCTTAGCTGATGCTTTAAATGCTATTAACAATGCTGAAAAAACTGGTAAACGTCAAGTTTTGATTAGACCATCTTCAAAGGTTATTATCAAATTTTTAACTGTTATGCAAAAGCATGGTATGTATTTTTTTTTTGGAAACATTGGACAATTATTTGAT	198.623	109.406
C1_03620C_A-T_751724_751819_96	C1_03620C_A	C1_03620C_A	Ca22chr1A_C_albicans_SC5314	-	ATA	751724-751819	ITNREMLLTRWITFQLYRSFTFPVHLYTIFLF	ATAACAAACCGGGAAATGCTTCTTACACGATGGATAACATTTCAATTGTATCGATCGTTTACTTTTCCTGTACATCTTTATACTATTTTTTTGTTC	10803.5	3343.62
C1_03620C_A-T_751876_751995_120	C1_03620C_A	C1_03620C_A	Ca22chr1A_C_albicans_SC5314	-	CTG	751876-751995	LLCKSMVCIFFLETLDNYLIKEFYSLFIYFFSTRIDNWMA	CTGTTATGCAAAAGCATGGTATGTATTTTTTTTTTGGAAACATTGGACAATTATTTGATTAAAGAATTCTATTCACTTTTTATTTATTTTTTTTCCACCCGAATTGATAACTGGATGGCT	374.589	552.688
C1_03620C_A-T_751666_751770_105	C1_03620C_A	C1_03620C_A	Ca22chr1A_C_albicans_SC5314	-	ATC	751666-751770	IDRLLFLYIFILFFCSSLIKLFANNKTKKGKRTHY	ATCGATCGTTTACTTTTCCTGTACATCTTTATACTATTTTTTTGTTCTAGTTTAATCAAACTTTTTGCCAACAACAAAACCAAAAAAGGAAAAAGAACTCATTAC	166.853	262.205
C1_03690W_A-T_765356_765415_60	C1_03690W_A	C1_03690W_A	Ca22chr1A_C_albicans_SC5314	+	AGG	765356-765415	RICPPSVECHSSFYCTPKRF	AGGATATGCCCTCCGAGTGTTGAATGTCATTCCTCATTCTACTGCACACCAAAAAGGTTT	12.878	18.8177
C1_03690W_A-T_765250_765375_126	C1_03690W_A	C1_03690W_A	Ca22chr1A_C_albicans_SC5314	+	ATG	765250-765375	MLLLLKNLLTDLKGARHWTQLPMTLTLKMPLQSITKDMPSEC	ATGTTACTTTTGCTAAAAAACTTGTTGACAGATTTGAAGGGAGCTCGGCATTGGACTCAACTTCCAATGACTCTTACTTTAAAAATGCCACTGCAATCAATAACAAAGGATATGCCCTCCGAGTGT	9.878	19.3603
C1_03690W_A-T_765379_765438_60	C1_03690W_A	C1_03690W_A	Ca22chr1A_C_albicans_SC5314	+	ATG	765379-765438	MSFLILLHTKKVLNLGLITS	ATGTCATTCCTCATTCTACTGCACACCAAAAAGGTTTTGAATCTTGGTTTGATTACATCA	4.731	10.3253
C1_03730C_A-T_778697_778783_87	C1_03730C_A	MNS1	Ca22chr1A_C_albicans_SC5314	-	TTG	778697-778783	LTTHSKQSLNSNCFPICELHSILTALLIN	TTGACTACTCACAGTAAACAATCATTAAATTCTAATTGTTTCCCCATTTGTGAATTGCATTCCATATTAACAGCTTTATTGATTAAT	0	62.5607
C1_03730C_A-T_778631_778690_60	C1_03730C_A	MNS1	Ca22chr1A_C_albicans_SC5314	-	GTG	778631-778690	VKKHKRNIILPSSTFLTICI	GTGAAGAAGCACAAAAGAAATATCATTTTACCCTCTTCCACCTTTCTTACTATTTGCATA	23.2523	7.782
C1_03730C_A-T_778834_778923_90	C1_03730C_A	MNS1	Ca22chr1A_C_albicans_SC5314	-	ATT	778834-778923	ILNSFTFYHFSFLKSNCIAKKKNKEKHTIN	ATTCTAAACTCATTTACTTTTTATCACTTCAGTTTCCTTAAATCCAATTGCATAGCAAAAAAAAAGAATAAAGAGAAGCATACAATCAAC	16.79	3.74667
C1_03730C_A-T_778617_778697_81	C1_03730C_A	MNS1	Ca22chr1A_C_albicans_SC5314	-	TTG	778617-778697	LIREEAQKKYHFTLFHLSYYLHINYTK	TTGATACGTGAAGAAGCACAAAAGAAATATCATTTTACCCTCTTCCACCTTTCTTACTATTTGCATATAAATTACACCAAA	17.2237	5.76433
C1_03780C_A-T_793612_793707_96	C1_03780C_A	HMG1	Ca22chr1A_C_albicans_SC5314	-	ATT	793612-793707	IFPTTFFFFFTFFTNKKKRRQHLLIVVSRVRV	ATTTTTCCGACAACCTTCTTTTTTTTTTTCACTTTCTTCACAAATAAAAAAAAAAGAAGACAACACCTGCTAATAGTTGTTTCTAGAGTTAGGGTT	9.37233	5.06367
C1_03780C_A-T_793638_793844_207	C1_03780C_A	HMG1	Ca22chr1A_C_albicans_SC5314	-	AAG	793638-793844	KYFILDQEEFCFQFLINPHIHIRESIQLYSTVFNKPNNYTSFLFFLFFRQPSFFFSLSSQIKKKEDNTC	AAGTATTTCATTTTAGACCAAGAGGAGTTTTGTTTTCAATTCTTAATAAATCCCCATATTCACATTAGAGAATCAATTCAACTTTATTCAACAGTGTTCAATAAACCAAACAACTACACGAGTTTTTTGTTTTTCTTATTTTTCCGACAACCTTCTTTTTTTTTTTCACTTTCTTCACAAATAAAAAAAAAAGAAGACAACACCTGC	12.645	10.4723
C1_03780C_A-T_793664_793795_132	C1_03780C_A	HMG1	Ca22chr1A_C_albicans_SC5314	-	ATC	793664-793795	IPIFTLENQFNFIQQCSINQTTTRVFCFSYFSDNLLFFFHFLHK	ATCCCCATATTCACATTAGAGAATCAATTCAACTTTATTCAACAGTGTTCAATAAACCAAACAACTACACGAGTTTTTTGTTTTTCTTATTTTTCCGACAACCTTCTTTTTTTTTTTCACTTTCTTCACAAA	13.014	2.723
C1_04110W_B-T_861900_862034_135	C1_04110W_B	C1_04110W_B	Ca22chr1B_C_albicans_SC5314	+	ATG	861900-862034	MAAAVISSKKKSDDNVPLGWVRLVGWKKKKHSKKKKITTCWHQLI	ATGGCTGCTGCTGTCATTTCTTCAAAAAAAAAAAGTGATGATAATGTGCCGTTGGGTTGGGTTAGGTTGGTTGGTTGGAAAAAAAAAAAACACTCGAAAAAAAAAAAGATAACCACTTGTTGGCATCAACTAATC	2.47	0.0273333
C1_04110W_B-T_861904_862008_105	C1_04110W_B	C1_04110W_B	Ca22chr1B_C_albicans_SC5314	+	CTG	861904-862008	LLLSFLQKKKVMIMCRWVGLGWLVGKKKNTRKKKR	CTGCTGCTGTCATTTCTTCAAAAAAAAAAAGTGATGATAATGTGCCGTTGGGTTGGGTTAGGTTGGTTGGTTGGAAAAAAAAAAAACACTCGAAAAAAAAAAAGA	3.176	0.0353333
C1_04200C_A-T_875445_875504_60	C1_04200C_A	C1_04200C_A	Ca22chr1A_C_albicans_SC5314	-	ATT	875445-875504	IELNSIITTTTTAIIIIIII	ATTGAATTGAATAGTATTATCACTACTACTACTACTGCTATTATTATTATTATTATTATT	0	4.764
C1_04200C_A-T_875411_875494_84	C1_04200C_A	C1_04200C_A	Ca22chr1A_C_albicans_SC5314	-	ATA	875411-875494	IVLSLLLLLLLLLLLLFNISISLITSII	ATAGTATTATCACTACTACTACTACTGCTATTATTATTATTATTATTATTTAATATATCAATTTCCCTTATAACTTCAATTATT	0	2.91767
C1_04200C_B-T_875458_875541_84	C1_04200C_B	C1_04200C_B	Ca22chr1B_C_albicans_SC5314	-	ATA	875458-875541	IVLSLLLLLLLLLLLLFNISIPLITSII	ATAGTATTATCACTACTACTACTACTACTGCTATTATTATTATTATTATTTAATATATCAATTCCCCTTATAACTTCAATTATT	8.598	0.838333
C1_04290C_A-T_888040_888168_129	C1_04290C_A	ACS2	Ca22chr1A_C_albicans_SC5314	-	ATA	888040-888168	IFFFLVVVVVCCFPQLRDYLLSFNKIYSSSILTDSFLFVLFRQ	ATATTTTTTTTTCTGGTTGTTGTTGTTGTTTGTTGTTTCCCTCAATTGCGTGATTACTTACTTTCTTTCAATAAAATCTATTCAAGTAGTATACTAACTGATTCTTTCCTTTTTGTTTTATTTCGACAG	14.7663	22.422
C1_04290C_A-T_888075_888152_78	C1_04290C_A	ACS2	Ca22chr1A_C_albicans_SC5314	-	TTG	888075-888152	LLLLFVVSLNCVITYFLSIKSIQVVY	TTGTTGTTGTTGTTTGTTGTTTCCCTCAATTGCGTGATTACTTACTTTCTTTCAATAAAATCTATTCAAGTAGTATAC	16.723	28.013
C1_04290C_B-T_888079_888195_117	C1_04290C_B	C1_04290C_B	Ca22chr1B_C_albicans_SC5314	-	CTG	888079-888195	LVVVVVCCFPQLRDNLLSFNKIYSSSILTDSFLFVLFRQ	CTGGTTGTTGTTGTTGTTTGTTGTTTCCCTCAATTGCGTGATAACTTACTTTCTTTCAATAAAATCTATTCAAGTAGTATACTAACTGATTCTTTCCTTTTTGTTTTATTTCGACAG	1.84	6.81367
C1_04290C_B-T_888114_888206_93	C1_04290C_B	C1_04290C_B	Ca22chr1B_C_albicans_SC5314	-	ATT	888114-888206	IFFSWLLLLFVVSLNCVITYFLSIKSIQVVY	ATTTTTTTTTCCTGGTTGTTGTTGTTGTTTGTTGTTTCCCTCAATTGCGTGATAACTTACTTTCTTTCAATAAAATCTATTCAAGTAGTATAC	2.31467	8.57233
C1_04450C_A-T_918279_918371_93	C1_04450C_A	FMA1	Ca22chr1A_C_albicans_SC5314	-	TTG	918279-918371	LTFKLVFLYLNNTTFIMSHVSIVTGASRGTF	TTGACATTCAAGTTAGTCTTTCTGTATTTGAATAATACTACATTTATCATGTCTCACGTCTCAATTGTAACTGGTGCTTCTAGAGGTACGTTT	25.2197	38.6923
C1_04770C_A-T_992796_992951_156	C1_04770C_A	ERG3	Ca22chr1A_C_albicans_SC5314	-	ATT	992796-992951	IFLPIVNPCSLSYLDLRFLQSRYLWTFYSLPISFPIVHISSIFFSFFRIRFS	ATTTTCCTTCCAATTGTTAATCCTTGCTCATTATCATATCTTGACCTAAGATTCCTACAATCTAGATATCTTTGGACATTCTATTCCCTTCCCATTTCTTTCCCTATTGTGCATATAAGTTCAATCTTTTTTTCTTTCTTTCGGATTCGGTTTAGC	3.14633	14.5233
C1_04770C_A-T_992906_992989_84	C1_04770C_A	ERG3	Ca22chr1A_C_albicans_SC5314	-	ATT	992906-992989	ITAYFERFFNSFPFSFQLLILAHYHILT	ATTACTGCTTACTTTGAGAGGTTCTTTAACAGTTTCCCATTTTCCTTCCAATTGTTAATCCTTGCTCATTATCATATCTTGACC	0.854333	13.036
C1_04770C_A-T_992935_993039_105	C1_04770C_A	ERG3	Ca22chr1A_C_albicans_SC5314	-	ATA	992935-993039	IIPFFSLKSTKVNLPITLLLTLRGSLTVSHFPSNC	ATAATCCCTTTTTTTTCATTAAAATCAACTAAGGTCAACCTTCCCATCACATTACTGCTTACTTTGAGAGGTTCTTTAACAGTTTCCCATTTTCCTTCCAATTGT	2.07467	15.7597
C1_04770C_A-T_992800_992886_87	C1_04770C_A	ERG3	Ca22chr1A_C_albicans_SC5314	-	ATA	992800-992886	ISLDILFPSHFFPYCAYKFNLFFFLSDSV	ATATCTTTGGACATTCTATTCCCTTCCCATTTCTTTCCCTATTGTGCATATAAGTTCAATCTTTTTTTCTTTCTTTCGGATTCGGTT	1.64967	7.241
C1_04770C_B-T_992941_993024_84	C1_04770C_B	C1_04770C_B	Ca22chr1B_C_albicans_SC5314	-	ATT	992941-993024	ITAYFKRFFNSFPFSFQLLILAHYHILT	ATTACTGCTTACTTTAAGAGGTTCTTTAACAGTTTCCCATTTTCCTTCCAATTGTTAATCCTTGCTCATTATCATATCTTGACC	1.64	1.62033
C1_04770C_B-T_992970_993074_105	C1_04770C_B	C1_04770C_B	Ca22chr1B_C_albicans_SC5314	-	ATA	992970-993074	IIPFFLLKSTKVNLPITLLLTLRGSLTVSHFPSNC	ATAATCCCTTTTTTTTTATTAAAATCAACTAAGGTCAACCTTCCCATCACATTACTGCTTACTTTAAGAGGTTCTTTAACAGTTTCCCATTTTCCTTCCAATTGT	1.312	1.614
C1_05030C_A-T_1054659_1054799_141	C1_05030C_A	PSF2	Ca22chr1A_C_albicans_SC5314	-	ATG	1054659-1054799	MVLPKNLQGNLMPSEITFLAENELITILPRYSIKKIDLIGVCIVFEI	ATGGTACTCCCAAAAAACCTTCAAGGGAATCTTATGCCATCAGAAATTACCTTTTTGGCAGAAAATGAACTCATAACCATTTTACCAAGATATTCAATCAAGAAAATTGATCTCATAGGAGTATGTATAGTTTTTGAAATC	4.808	3.812
C1_05030C_A-T_1054727_1054816_90	C1_05030C_A	PSF2	Ca22chr1A_C_albicans_SC5314	-	ATA	1054727-1054816	IILNPSWYSQKTFKGILCHQKLPFWQKMNS	ATAATCCTTAACCCGTCATGGTACTCCCAAAAAACCTTCAAGGGAATCTTATGCCATCAGAAATTACCTTTTTGGCAGAAAATGAACTCA	5.69567	1.81167
C1_05180C_A-T_1097413_1097565_153	C1_05180C_A	C1_05180C_A	Ca22chr1A_C_albicans_SC5314	-	ATA	1097413-1097565	IDIHIIYIYQYHHVSNRVPTTSYVYYLIILFNLFSIFHDLEDSFLIYHFFK	ATAGACATTCACATCATATATATATATCAATACCATCATGTCAGTAACAGAGTTCCCACCACTTCGTATGTATATTATTTAATTATTTTGTTCAATTTATTTTCAATATTTCATGATTTGGAAGATTCCTTTTTAATTTATCATTTTTTCAAA	68.7717	11.6127
C1_05180C_A-T_1097487_1097546_60	C1_05180C_A	C1_05180C_A	Ca22chr1A_C_albicans_SC5314	-	ATA	1097487-1097546	IYINTIMSVTEFPPLRMYII	ATATATATCAATACCATCATGTCAGTAACAGAGTTCCCACCACTTCGTATGTATATTATT	153.243	28.5623
C1_05190C_A-T_1098508_1098597_90	C1_05190C_A	C1_05190C_A	Ca22chr1A_C_albicans_SC5314	-	ATA	1098508-1098597	ITNMAHTENYEYPPIRMYIKPTHKKRNIPS	ATAACAAACATGGCTCACACGGAGAATTATGAATACCCACCTATTCGTATGTATATAAAACCAACACACAAAAAGAGAAACATACCTTCA	60.4187	52.1953
C1_05190C_A-T_1098494_1098565_72	C1_05190C_A	C1_05190C_A	Ca22chr1A_C_albicans_SC5314	-	ATA	1098494-1098565	IPTYSYVYKTNTQKEKHTFIMRLF	ATACCCACCTATTCGTATGTATATAAAACCAACACACAAAAAGAGAAACATACCTTCATAATGAGGCTGTTT	43.5223	28.7523
C1_05900W_A-T_1226440_1226502_63	C1_05900W_A	C1_05900W_A	Ca22chr1A_C_albicans_SC5314	+	AGG	1226440-1226502	RIIYIFNHQLHLKKNQLLFIR	AGGATTATTTACATCTTTAATCATCAACTCCATTTAAAAAAAAACCAACTACTATTCATTCGC	40.4347	6.58267
C1_05900W_A-T_1226493_1226600_108	C1_05900W_A	C1_05900W_A	Ca22chr1A_C_albicans_SC5314	+	ATT	1226493-1226600	IHSLKKQHPTTFPNFFVFVFVYITFFFQLLSNLIRL	ATTCATTCGCTAAAAAAACAACACCCAACCACCTTTCCTAATTTTTTTGTTTTCGTTTTCGTTTATATTACCTTTTTCTTTCAATTGTTATCAAACTTGATTAGACTT	24.3523	3.977
C1_05930C_A-T_1241955_1242056_102	C1_05930C_A	C1_05930C_A	Ca22chr1A_C_albicans_SC5314	-	TTG	1241955-1242056	LVNFTYCSEISRVVIIIKKNNKSHSITSIYPSDK	TTGGTAAATTTTACTTACTGTTCGGAGATTTCTCGTGTTGTAATAATAATAAAAAAAAATAATAAGAGTCATTCAATCACATCAATCTACCCATCTGACAAA	0.621667	25.0363
C1_05940W_A-T_1244496_1244567_72	C1_05940W_A	PHO87	Ca22chr1A_C_albicans_SC5314	+	AAG	1244496-1244567	KNFFYFYFLVFFPFQPSCILNYIS	AAGAATTTTTTTTATTTTTATTTTCTTGTCTTCTTCCCCTTTCAACCATCTTGCATTTTGAATTATATTTCT	4.86833	4.10333
C1_05940W_A-T_1244583_1244642_60	C1_05940W_A	PHO87	Ca22chr1A_C_albicans_SC5314	+	AAG	1244583-1244642	KSISNHYYYYYYHYHYCYHC	AAGTCAATATCCAACCACTACTACTACTACTACTACCACTACCACTACTGCTACCACTGT	35.38	70.7333
C1_05940W_B-T_1244579_1244638_60	C1_05940W_B	C1_05940W_B	Ca22chr1B_C_albicans_SC5314	+	AAG	1244579-1244638	KSISNHYYYYYYHYCYCYHC	AAGTCAATATCCAACCACTACTACTACTACTACTACCACTACTGCTACTGCTACCACTGT	16.9497	16.993
C1_06050C_A-T_1271557_1271640_84	C1_06050C_A	C1_06050C_A	Ca22chr1A_C_albicans_SC5314	-	ATG	1271557-1271640	MVSVCIIYVLYQSRAILALFLLLEKVVP	ATGGTTTCAGTATGTATAATATATGTTTTATATCAATCAAGAGCAATATTAGCATTATTTTTATTATTAGAGAAAGTAGTACCT	11.3737	6.952
C1_06200W_A-T_1294614_1294820_207	C1_06200W_A	C1_06200W_A	Ca22chr1A_C_albicans_SC5314	+	TTG	1294614-1294820	LLVIYLNAYCQIYCISHQLEKLLPLQFCQMYKLVRTSLDTRVVMNQTLVTRNVIATDSISNSVIKEGY	TTGTTGGTTATTTACCTAAATGCATATTGCCAAATTTATTGTATTTCCCACCAATTAGAGAAATTGTTGCCTCTACAATTTTGTCAGATGTACAAATTGGTACGTACATCTTTAGACACGAGGGTAGTGATGAACCAGACGTTGGTTACTCGAAATGTTATTGCGACCGATTCGATATCAAATTCAGTAATTTKAAAAGAAGGGTAT	4.074	15.394
C1_06350W_A-T_1350357_1350440_84	C1_06350W_A	C1_06350W_A	Ca22chr1A_C_albicans_SC5314	+	ATA	1350357-1350440	IIYIISPFIPFHSIPPLPHINPIICFIN	ATAATTTATATTATATCCCCTTTCATTCCATTCCATTCCATCCCCCCCCTCCCCCATATTAATCCTATCATTTGTTTCATAAAT	0.553	6.271
C1_06350W_A-T_1350480_1350668_189	C1_06350W_A	C1_06350W_A	Ca22chr1A_C_albicans_SC5314	+	ATC	1350480-1350668	INKFILFIIDFVINSIFFFSIKEQYFNTPSRLIIVLHKYLVFFFFQFHVSLYILNYNPPIFLI	ATCAACAAGTTTATTTTATTCATTATTGATTTTGTAATAAACTCAATTTTTTTTTTTTCCATAAAGGAACAATACTTTAATACTCCATCACGTCTTATTATTGTTCTTCACAAGTACTTGGTGTTTTTTTTTTTTCAGTTTCATGTATCATTATATATATTGAACTACAACCCCCCAATCTTTTTGATT	4.18867	0.137333
C1_06350W_A-T_1350364_1350435_72	C1_06350W_A	C1_06350W_A	Ca22chr1A_C_albicans_SC5314	+	ATA	1350364-1350435	ILYPLSFHSIPSPPSPILILSFVS	ATATTATATCCCCTTTCATTCCATTCCATTCCATCCCCCCCCTCCCCCATATTAATCCTATCATTTGTTTCA	0.645333	7.316
C1_06350W_A-T_1350428_1350505_78	C1_06350W_A	C1_06350W_A	Ca22chr1A_C_albicans_SC5314	+	TTG	1350428-1350505	LFHKLIESNNNHNIIFLNQQVYFIHY	TTGTTTCATAAATTGATAGAAAGTAACAACAACCACAATATTATTTTCTTGAATCAACAAGTTTATTTTATTCATTAT	1.302	6.61067
C1_06450C_A-T_1376607_1376690_84	C1_06450C_A	RPS14B	Ca22chr1A_C_albicans_SC5314	-	ATA	1376607-1376690	INSNIKDVHWYVLPEPVMYYTSCKLNRK	ATAAACAGTAATATCAAAGATGTCCACTGGTATGTTCTACCTGAACCAGTAATGTATTACACCTCATGTAAGTTGAATAGAAAG	447.858	241.783
C1_06550W_A-T_1397867_1398022_156	C1_06550W_A	GLT1	Ca22chr1A_C_albicans_SC5314	+	AAG	1397867-1398022	KNRLTYNYQLEGQFQFIPITILYYSSVLVYLIEEFFIFLEFSYRDTRKLVGL	AAGAATAGGCTAACTTATAATTATCAACTGGAGGGACAATTTCAATTCATTCCAATTACAATTTTATATTATTCAAGTGTCTTAGTTTATCTTATAGAGGAATTTTTTATTTTTTTAGAATTTTCATACAGAGATACAAGAAAACTAGTCGGTCTA	0.353333	1.49967
C1_06550W_B-T_1397926_1398162_237	C1_06550W_B	C1_06550W_B	Ca22chr1B_C_albicans_SC5314	+	AGG	1397926-1398162	RTISIHSNYNFILFKCLSLSYRGIFYFFRIFIQRYKKTSQSIIHSIVQSTTLVTNFFYLKYTILYLFLQLYKTPHPTIR	AGGACAATTTCAATTCATTCCAATTACAATTTTATATTATTCAAGTGTCTTAGTTTATCTTATAGAGGAATTTTTTATTTTTTTAGAATTTTCATACAGAGATACAAGAAAACTAGTCAGTCTATAATTCATTCCATAGTCCAAAGTACCACTCTTGTGACTAATTTTTTCTATTTAAAGTATACTATATTATATTTATTTCTACAACTGTATAAAACACCACACCCTACCATACGT	8.629	2.12
C1_06550W_B-T_1398107_1398172_66	C1_06550W_B	C1_06550W_B	Ca22chr1B_C_albicans_SC5314	+	ATA	1398107-1398172	ILYYIYFYNCIKHHTLPYVNLL	ATACTATATTATATTTATTTCTACAACTGTATAAAACACCACACCCTACCATACGTTAATCTACTT	30.986	2.728
C1_06700W_A-T_1432996_1433115_120	C1_06700W_A	C1_06700W_A	Ca22chr1A_C_albicans_SC5314	+	ATG	1432996-1433115	MSPTRMMLVTICNIQQVVVMNPHLHLHLQNTLHQIRLMVM	ATGTCACCGACGAGGATGATGCTGGTTACGATTTGCAATATTCAGCAAGTGGTGGTGATGAATCCCCACCTCCACCTCCACCTCCAAAACACATTACACCAAATAAGACTTATGGTTATG	2.59267	3.14567
C1_06700W_A-T_1433122_1433202_81	C1_06700W_A	C1_06700W_A	Ca22chr1A_C_albicans_SC5314	+	ACG	1433122-1433202	TIILINLRHVFHLMLMILEYLQTPRVS	ACGATCATTTTAATAAACCTACGCCACGTGTTCCATTTGATGCTGATGATTTTAGAATATCTACAAACTCCCAGGGTGTCA	29.6003	8.08333
C1_06700W_A-T_1433302_1433370_69	C1_06700W_A	C1_06700W_A	Ca22chr1A_C_albicans_SC5314	+	GTG	1433302-1433370	VLLVLVHFLDINTKKIYKLVNWV	GTGCTACTAGTGCTGGTTCATTTCTTAGACATAAATACGAAAAAGATTTACAAGCTAGTCAATTGGGTC	8.785	2.83167
C1_06850W_A-T_1458961_1459143_183	C1_06850W_A	PCL7	Ca22chr1A_C_albicans_SC5314	+	ATC	1458961-1459143	ILIQSLTITKTIITAIRYLISNLYFPSPNQLLSWRTILSSVAIAVFFFQSRGQIIQSVETD	ATCTTGATTCAAAGTCTTACTATAACTAAGACCATTATCACAGCTATTCGGTATCTGATTTCAAATCTATATTTCCCTTCTCCTAACCAATTACTAAGTTGGAGAACAATTTTGTCATCAGTTGCAATTGCAGTTTTTTTTTTTCAATCAAGAGGACAAATCATTCAAAGTGTTGAAACTGAT	3.463	2.199
C1_06850W_A-T_1459156_1459215_60	C1_06850W_A	PCL7	Ca22chr1A_C_albicans_SC5314	+	ATA	1459156-1459215	IYVCYLGLIFVDTRDIANIQ	ATATATGTATGCTATTTGGGACTTATTTTCGTTGATACAAGAGACATTGCCAACATACAA	0.918333	3.81233
C1_06850W_A-T_1459082_1459222_141	C1_06850W_A	PCL7	Ca22chr1A_C_albicans_SC5314	+	TTG	1459082-1459222	LQLQFFFFNQEDKSFKVLKLIDFITYMYAIWDLFSLIQETLPTYNNN	TTGCAATTGCAGTTTTTTTTTTTCAATCAAGAGGACAAATCATTCAAAGTGTTGAAACTGATTGATTTCATTACATATATGTATGCTATTTGGGACTTATTTTCGTTGATACAAGAGACATTGCCAACATACAATAATAAT	3.51733	2.22667
C1_06850W_A-T_1458840_1458938_99	C1_06850W_A	PCL7	Ca22chr1A_C_albicans_SC5314	+	ATT	1458840-1458938	ICTNKLPPARLKRKQASLFSHIQSTRIKEKKAH	ATTTGTACTAATAAATTACCACCAGCAAGACTCAAAAGAAAGCAAGCAAGTTTATTTAGCCATATACAATCAACGAGGATAAAAGAAAAGAAAGCACAT	6.52133	2.88233
C1_06850W_A-T_1459050_1459133_84	C1_06850W_A	PCL7	Ca22chr1A_C_albicans_SC5314	+	ATT	1459050-1459133	ITKLENNFVISCNCSFFFSIKRTNHSKC	ATTACTAAGTTGGAGAACAATTTTGTCATCAGTTGCAATTGCAGTTTTTTTTTTTCAATCAAGAGGACAAATCATTCAAAGTGT	3.28	1.77067
C1_06850W_A-T_1459194_1459262_69	C1_06850W_A	PCL7	Ca22chr1A_C_albicans_SC5314	+	AAG	1459194-1459262	KRHCQHTIIIKSPIIIETYKQKS	AAGAGACATTGCCAACATACAATAATAATTAAATCCCCCATTATAATAGAAACATACAAACAAAAAAGC	0.798667	2.67067
C1_06930W_A-T_1475521_1475604_84	C1_06930W_A	PGA63	Ca22chr1A_C_albicans_SC5314	+	ATT	1475521-1475604	ILPFYIICQLHFYIKHHYFFFLCPILLF	ATTCTTCCTTTTTATATTATCTGTCAATTGCACTTTTATATCAAGCATCACTATTTTTTTTTTCTTTGCCCCATTCTTTTGTTT	1.739	5.029
C1_06930W_A-T_1475498_1475617_120	C1_06930W_A	PGA63	Ca22chr1A_C_albicans_SC5314	+	TTG	1475498-1475617	LIYSYLIQFFLFILSVNCTFISSITIFFFFAPFFCFKVLF	TTGATTTATAGTTATTTAATTCAATTCTTCCTTTTTATATTATCTGTCAATTGCACTTTTATATCAAGCATCACTATTTTTTTTTTCTTTGCCCCATTCTTTTGTTTTAAAGTATTGTTT	1.51633	3.67467
C1_06930W_A-T_1475541_1475642_102	C1_06930W_A	PGA63	Ca22chr1A_C_albicans_SC5314	+	CTG	1475541-1475642	LSIALLYQASLFFFSLPHSFVLKYCFEISKEKYS	CTGTCAATTGCACTTTTATATCAAGCATCACTATTTTTTTTTTCTTTGCCCCATTCTTTTGTTTTAAAGTATTGTTTTGAAATTAGTAAAGAAAAATATTCA	2.05433	5.40333
C1_07120W_A-T_1526866_1526928_63	C1_07120W_A	GAP4	Ca22chr1A_C_albicans_SC5314	+	ATT	1526866-1526928	IHQLFHKLIDITITITITTFI	ATTCATCAATTATTTCATAAACTAATTGACATCACTATCACTATCACTATCACCACCTTCATC	12.4377	9.29633
C1_07120W_A-T_1526735_1526806_72	C1_07120W_A	GAP4	Ca22chr1A_C_albicans_SC5314	+	AGG	1526735-1526806	RLLVYSTSLHSLILVKVRTFFISS	AGGTTGTTAGTGTATTCAACGTCTCTCCATTCCTTGATACTTGTCAAAGTTCGTACTTTTTTCATTTCTTCA	40.3483	29.7507
C1_07120W_A-T_1526775_1526882_108	C1_07120W_A	GAP4	Ca22chr1A_C_albicans_SC5314	+	TTG	1526775-1526882	LSKFVLFSFLHSVYFFVAILFITLQSFHRLNSSIIS	TTGTCAAAGTTCGTACTTTTTTCATTTCTTCATAGCGTCTACTTCTTCGTTGCTATATTGTTTATTACCCTTCAGTCTTTCCACAGACTAAATTCATCAATTATTTCA	6.413	10.1313
C1_07190W_A-T_1542075_1542182_108	C1_07190W_A	SOG2	Ca22chr1A_C_albicans_SC5314	+	ATA	1542075-1542182	IKLIQLKRAIYNSTPPAFAFTPDYIIYQLIKEGQLC	ATAAAACTTATTCAACTTAAAAGAGCCATCTACAACAGTACACCACCGGCATTTGCATTTACTCCTGATTACATTATTTATCAACTAATAAAAGAGGGACAGCTCTGT	5.16233	2.22067
C1_07240W_A-T_1553382_1553477_96	C1_07240W_A	YPD1	Ca22chr1A_C_albicans_SC5314	+	ATA	1553382-1553477	ILKHFFYFQLCSDNQSRRHYIDNQYLRKFLEY	ATATTAAAACATTTCTTTTATTTTCAACTCTGCAGTGATAACCAATCAAGACGGCACTACATTGATAATCAATATTTGAGAAAGTTCTTGGAATAC	3.81767	2.58633
C1_07240W_A-T_1553392_1553457_66	C1_07240W_A	YPD1	Ca22chr1A_C_albicans_SC5314	+	ATT	1553392-1553457	ISFIFNSAVITNQDGTTLIINI	ATTTCTTTTATTTTCAACTCTGCAGTGATAACCAATCAAGACGGCACTACATTGATAATCAATATT	4.71833	3.425
C1_07240W_B-T_1553412_1553507_96	C1_07240W_B	C1_07240W_B	Ca22chr1B_C_albicans_SC5314	+	ATA	1553412-1553507	ILKHFFYFQLCSDNQSRRHYIDNQYLRKFLGY	ATATTAAAACATTTCTTTTATTTTCAACTCTGCAGTGATAACCAATCAAGACGGCACTACATTGATAATCAATATTTGAGAAAGTTCTTGGGATAT	0	15.6
C1_07780W_A-T_1696288_1696386_99	C1_07780W_A	C1_07780W_A	Ca22chr1A_C_albicans_SC5314	+	ATC	1696288-1696386	IQQWLLQSIVSQAYQHKRMIPIYTLTWMKYLPN	ATCCAGCAATGGCTACTACAAAGCATCGTCAGTCAAGCATATCAACACAAGAGGATGATACCAATTTATACTCTGACGTGGATGAAATATTTACCAAAC	9.30433	7.216
C1_07780W_A-T_1696268_1696342_75	C1_07780W_A	C1_07780W_A	Ca22chr1A_C_albicans_SC5314	+	ATC	1696268-1696342	ILQTIIKSSNGYYKASSVKHINTRG	ATCTTACAAACAATAATTAAATCCAGCAATGGCTACTACAAAGCATCGTCAGTCAAGCATATCAACACAAGAGGA	9.18433	2.549
C1_08000W_A-T_1746799_1746864_66	C1_08000W_A	NRP1	Ca22chr1A_C_albicans_SC5314	+	TTG	1746799-1746864	LPHTYPRIKYLLVLSGIEENQT	TTGCCCCATACATATCCAAGAATTAAATACTTATTAGTTCTAAGTGGAATAGAAGAGAATCAAACT	3.61667	2.29433
C1_08000W_A-T_1746952_1747053_102	C1_08000W_A	NRP1	Ca22chr1A_C_albicans_SC5314	+	ATA	1746952-1747053	IHTFFCILSGKPHPTTSYIPQNPLILFLVVLLIY	ATACATACTTTCTTTTGTATTTTATCAGGGAAGCCACATCCAACCACCAGTTACATCCCACAAAATCCCTTAATCTTGTTCTTAGTTGTATTATTAATCTAT	19.9933	0.944667
C1_08000W_A-T_1746825_1747094_270	C1_08000W_A	NRP1	Ca22chr1A_C_albicans_SC5314	+	ATA	1746825-1747094	ILISSKWNRRESNLTLLLRNVKRAFFLVLICFISIESLRITEYTYFLLYFIREATSNHQLHPTKSLNLVLSCIINLLNLSLICKRKLWIV	ATACTTATTAGTTCTAAGTGGAATAGAAGAGAATCAAACTTAACATTACTGTTACGCAACGTCAAGAGGGCATTTTTTTTAGTTTTAATTTGTTTCATTTCAATTGAATCTTTAAGAATCACCGAGTATACATACTTTCTTTTGTATTTTATCAGGGAAGCCACATCCAACCACCAGTTACATCCCACAAAATCCCTTAATCTTGTTCTTAGTTGTATTATTAATCTATTGAATTTAAGTTTGATTTGCAAGAGAAAATTGTGGATTGTA	8.17167	1.02933
C1_08110W_A-T_1768899_1768958_60	C1_08110W_A	C1_08110W_A	Ca22chr1A_C_albicans_SC5314	+	TTG	1768899-1768958	LGTITRRKVIETKKEKRVKH	TTGGGAACAATTACAAGAAGAAAGGTAATAGAAACAAAGAAAGAAAAAAGAGTGAAACAC	2.71233	21.768
C1_08110W_A-T_1768720_1768794_75	C1_08110W_A	C1_08110W_A	Ca22chr1A_C_albicans_SC5314	+	ATC	1768720-1768794	IPITLNIKNHILDLLDINNYFYSLI	ATCCCCATCACCTTAAATATCAAGAATCATATTTTGGATCTACTTGACATTAATAACTACTTTTACAGTCTAATT	5.25433	4.21367
C1_08110W_A-T_1768813_1768923_111	C1_08110W_A	C1_08110W_A	Ca22chr1A_C_albicans_SC5314	+	ATT	1768813-1768923	IILYSTIKIIRKKRGLISLLSHRRNYLDSWEQLQEER	ATTATTCTTTATAGCACTATTAAGATTATTAGGAAAAAACGAGGACTAATAAGCTTATTGTCTCATCGAAGAAATTACCTTGATAGTTGGGAACAATTACAAGAAGAAAGG	3.452	14.727
C1_08110W_B-T_1768914_1768997_84	C1_08110W_B	C1_08110W_B	Ca22chr1B_C_albicans_SC5314	+	TTG	1768914-1768997	LGTITRRKVIETKKEKRVKHQNINQRIF	TTGGGAACAATCACAAGAAGAAAGGTAATAGAAACAAAGAAAGAAAAAAGAGTGAAACACCAAAATATAAACCAAAGAATATTT	3.77567	5.426
C1_08370W_A-T_1838952_1839074_123	C1_08370W_A	SDS24	Ca22chr1A_C_albicans_SC5314	+	ATA	1838952-1839074	ISIIRDNFSVIVEIHTPKTNLIYIYTSQTNSSRRKISKKKV	ATATCCATTATAAGAGACAATTTCAGTGTGATTGTTGAAATCCATACACCAAAAACTAATCTCATTTATATTTATACATCACAAACCAATTCTTCGAGAAGAAAAATCAGTAAAAAAAAAGTA	4.78233	19.1007
C1_08370W_A-T_1838983_1839147_165	C1_08370W_A	SDS24	Ca22chr1A_C_albicans_SC5314	+	TTG	1838983-1839147	LLKSIHQKLISFIFIHHKPILREEKSVKKKYKIFEEAIVQIESSKQSNKQKKKEE	TTGTTGAAATCCATACACCAAAAACTAATCTCATTTATATTTATACATCACAAACCAATTCTTCGAGAAGAAAAATCAGTAAAAAAAAAGTATAAAATCTTTGAAGAAGCTATTGTACAAATCGAGAGTTCAAAGCAATCAAACAAGCAAAAAAAAAAAGAAGAA	0.435	5.25833
C1_08710W_A-T_1901268_1901390_123	C1_08710W_A	C1_08710W_A	Ca22chr1A_C_albicans_SC5314	+	ATT	1901268-1901390	IRVEPRCFLLIEIYKYVNIIHFASVIFFSVATCKFSEDIAR	ATTAGAGTTGAGCCACGTTGTTTTCTTTTAATTGAAATATACAAGTATGTAAATATTATTCACTTTGCTAGTGTAATTTTTTTTTCTGTTGCAACATGTAAATTTTCTGAAGACATCGCCAGA	1.34133	4.30133
C1_09110W_A-T_1986594_1986749_156	C1_09110W_A	C1_09110W_A	Ca22chr1A_C_albicans_SC5314	+	ATG	1986594-1986749	MIIIKLIATVIKNYNYKNSKGNIQKNTPPEEEEEIYIHESVDLYNHQLFLMI	ATGATTATAATCAAACTGATAGCAACTGTTATCAAAAACTACAACTACAAAAACAGCAAAGGAAATATTCAGAAGAATACACCACCCGAAGAGGAGGAGGAGATATATATTCACGAATCAGTCGATCTTTACAACCATCAATTATTCCTCATGATT	6.48433	1.69733
C1_09110W_A-T_1986619_1986744_126	C1_09110W_A	C1_09110W_A	Ca22chr1A_C_albicans_SC5314	+	CTG	1986619-1986744	LLSKTTTTKTAKEIFRRIHHPKRRRRYIFTNQSIFTTINYSS	CTGTTATCAAAAACTACAACTACAAAAACAGCAAAGGAAATATTCAGAAGAATACACCACCCGAAGAGGAGGAGGAGATATATATTCACGAATCAGTCGATCTTTACAACCATCAATTATTCCTCA	8.02833	1.925
C1_09120W_B-T_1991184_1991318_135	C1_09120W_B	C1_09120W_B	Ca22chr1B_C_albicans_SC5314	+	ATC	1991184-1991318	IFIENHIYLLITKKSFQQSIQDYPHSSPVDFSSISDFTIPGISYS	ATCTTTATTGAAAATCATATTTACTTATTGATTACTAAAAAAAGTTTTCAACAATCAATTCAAGACTATCCCCATTCATCCCCAGTCGACTTTAGTAGTATCTCCGATTTTACCATTCCCGGCATATCCTATTCC	0.204	0.937
C1_09120W_B-T_1991245_1991346_102	C1_09120W_B	C1_09120W_B	Ca22chr1B_C_albicans_SC5314	+	AAG	1991245-1991346	KTIPIHPQSTLVVSPILPFPAYPIPNQNNLQPLK	AAGACTATCCCCATTCATCCCCAGTCGACTTTAGTAGTATCTCCGATTTTACCATTCCCGGCATATCCTATTCCTAACCAAAACAACCTACAACCATTAAAG	0.621667	1.24033
C1_09610W_A-T_2117600_2117710_111	C1_09610W_A	C1_09610W_A	Ca22chr1A_C_albicans_SC5314	+	ATA	2117600-2117710	IKNFNYFPELLHFFLLLQPKASNNKLNFNQLISKKVV	ATAAAGAACTTCAATTATTTCCCAGAACTGTTGCACTTTTTTCTCCTTTTACAGCCAAAAGCATCGAACAACAAATTAAATTTCAACCAATTAATTAGCAAGAAAGTTGTA	9.20867	5.512
C1_09610W_A-T_2117703_2117774_72	C1_09610W_A	C1_09610W_A	Ca22chr1A_C_albicans_SC5314	+	AAG	2117703-2117774	KLYNTCSIAVRYKISISVLHKSFC	AAGTTGTATAATACGTGTTCCATAGCTGTGAGATATAAGATTTCAATTTCAGTATTACATAAATCATTCTGT	14.1967	7.983
C1_09650W_A-T_2123837_2123974_138	C1_09650W_A	C1_09650W_A	Ca22chr1A_C_albicans_SC5314	+	AGG	2123837-2123974	RKNLIILRYDTGNQGLSCIQFHLIVTATKIERKKARRGRDTIVSLQ	AGGAAAAACTTAATCATTCTTCGATACGACACTGGCAATCAGGGACTCTCTTGTATTCAATTTCACTTAATTGTTACTGCAACCAAAATTGAAAGAAAGAAGGCAAGAAGGGGACGAGACACTATTGTTAGTTTGCAG	1.83867	7.99367
C1_09650W_A-T_2123907_2124026_120	C1_09650W_A	C1_09650W_A	Ca22chr1A_C_albicans_SC5314	+	TTG	2123907-2124026	LLLQPKLKERRQEGDETLLLVCSDHPSPSSVPFVKHFLSN	TTGTTACTGCAACCAAAATTGAAAGAAAGAAGGCAAGAAGGGGACGAGACACTATTGTTAGTTTGCAGTGACCACCCCTCTCCATCATCAGTCCCATTTGTGAAACACTTCCTTTCCAAT	3.26233	17.7203
C1_10620W_A-T_2352372_2352458_87	C1_10620W_A	C1_10620W_A	Ca22chr1A_C_albicans_SC5314	+	TTG	2352372-2352458	LIDLDNQPTNRPTNQTSHLFFFSNLKLIG	TTGATTGACTTAGACAACCAACCAACCAACCGACCAACCAACCAAACTAGTCATTTATTTTTTTTTTCTAACTTGAAATTAATAGGA	13.1683	70.7233
C1_11050W_A-T_2434216_2434302_87	C1_11050W_A	C1_11050W_A	Ca22chr1A_C_albicans_SC5314	+	ATT	2434216-2434302	INLTVSYVHNCCIFIYELEQIIIMNYNLF	ATTAATTTAACTGTATCATATGTTCATAATTGTTGTATCTTTATTTACGAATTAGAACAAATAATTATAATGAATTACAATTTATTT	18.8017	53.6437
C1_11050W_A-T_2434245_2434370_126	C1_11050W_A	C1_11050W_A	Ca22chr1A_C_albicans_SC5314	+	TTG	2434245-2434370	LLYLYLRIRTNNYNELQFILKRKKGIWPVRLLHKCCCLAGLL	TTGTTGTATCTTTATTTACGAATTAGAACAAATAATTATAATGAATTACAATTTATTTTAAAAAGAAAGAAAGGGATTTGGCCTGTTCGACTATTACATAAATGTTGTTGTTTGGCTGGCTTATTG	4.139	28.4813
C1_11190W_A-T_2454737_2454853_117	C1_11190W_A	ARL3	Ca22chr1A_C_albicans_SC5314	+	ATA	2454737-2454853	ISVTKLIDVISDLGSHLIEFAQILCSIPFNLLLTDIRTL	ATATCCGTTACTAAACTTATAGACGTAATCTCAGATCTAGGTTCACACTTAATTGAATTCGCTCAGATACTGTGTTCCATTCCATTCAATTTGCTGCTAACCGATATTCGTACCTTA	2.66167	3.48833
C1_11720W_A-T_2567613_2567705_93	C1_11720W_A	C1_11720W_A	Ca22chr1A_C_albicans_SC5314	+	ATA	2567613-2567705	IFYCVLIILSRKECVLFLTISFENSHPSIVS	ATATTCTATTGTGTTTTGATAATACTTAGCCGAAAGGAGTGTGTTTTATTTTTAACGATTAGTTTTGAAAATTCACACCCATCCATCGTCTCA	16.2947	3.838
C1_11720W_A-T_2567677_2567751_75	C1_11720W_A	C1_11720W_A	Ca22chr1A_C_albicans_SC5314	+	TTG	2567677-2567751	LKIHTHPSSHSKNTTTTHTTKKVTQ	TTGAAAATTCACACCCATCCATCGTCTCATAGTAAAAACACCACCACCACGCACACAACAAAAAAAGTAACCCAA	0	3.57333
C1_11730W_A-T_2568510_2568590_81	C1_11730W_A	C1_11730W_A	Ca22chr1A_C_albicans_SC5314	+	ACG	2568510-2568590	TVHSISQIPKLMNQTIQNKQVLVTRLN	ACGGTTCACAGTATAAGTCAAATTCCAAAGCTAATGAATCAGACTATTCAAAACAAACAGGTATTGGTGACCAGGCTCAAT	3.635	4.45833
C1_11730W_B-T_2568545_2568625_81	C1_11730W_B	C1_11730W_B	Ca22chr1B_C_albicans_SC5314	+	ACG	2568545-2568625	TVHSISQIPKLMNQTIQNKQVLVTKLN	ACGGTTCACAGTATAAGTCAAATTCCAAAGCTAATGAATCAGACTATTCAAAACAAACAGGTATTGGTGACCAAGCTCAAT	0	1.83633
C1_12490W_A-T_2722435_2722842_408	C1_12490W_A	PEP1	Ca22chr1A_C_albicans_SC5314	+	ATG	2722435-2722842	MRNNNWNWLIFLVPFILSLTTAYTPDISVVKNKSPAREIKYFDDSSNLLVLRDEHLLISKNDGKSFEEIPDIKDPIIYFEMDPTNKNRAFAMTLSXXXXXXQKIRVINGGHLKLIFSMVKWHQFLKLLLILKIQII	ATGAGGAATAATAATTGGAATTGGCTAATATTCTTGGTGCCATTTATTTTATCCTTAACAACTGCTTATACTCCAGATATATCAGTTGTTAAAAACAAATCACCAGCAAGAGAAATTAAATATTTTGATGATTCTTCCAATTTATTAGTTTTAAGAGATGAACATCTTTTAATCTCGAAAAATGATGGTAAATCATTTGAAGAAATTCCTGATATTAAAGATCCAATTATTTATTTTGAAATGGATCCAACTAACAAGAATCGTGCCTTTGCCATGACACTTTCTCNNNNNNNNNNNNNNNNACAGAAGATCAGGGTAATAAATGGCGGACATTTGAAATTGATATTTTCAATGGTGAAATGGCATCAATTCCTAAAATTACTTTTAATTTTGAAAATC…	3.65	2.49767
C1_12490W_A-T_2722885_2723040_156	C1_12490W_A	PEP1	Ca22chr1A_C_albicans_SC5314	+	ATC	2722885-2723040	IVIVNIDIFSRKMGLNQNQINYLSMLMFVDLLNQLKPPKLVKVKRFFVLLIN	ATCGTAATTGTAAACATAGATATTTTTTCACGAAAGATGGGTTTAAATCAAAACCAAATAAATTACCTGTCGATGCTCATGTTTGTCGATTTGCTAAATCAACTAAAACCTCCAAAATTGGTAAAAGTGAAACGATTTTTTGTACTGTTAATCAAT	4.56767	4.694
C1_12490W_A-T_2723044_2723163_120	C1_12490W_A	PEP1	Ca22chr1A_C_albicans_SC5314	+	ATT	2723044-2723163	ILMVILLNLIYIIQMIFSKIKMKLKLNLWILQVVKSLMLK	ATTCTTATGGTCATATTGTTGAATCTCATTTATATAATTCAAATGATTTTTTCCAAAATAAAAATGAAATTAAAATTAAACCTTTGGATTCTTCAAGTGGTGAAATCATTGATGTTAAAA	0	11.487
C1_12490W_A-T_2722616_2722708_93	C1_12490W_A	PEP1	Ca22chr1A_C_albicans_SC5314	+	ATG	2722616-2722708	MMVNHLKKFLILKIQLFILKWIQLTRIVPLP	ATGATGGTAAATCATTTGAAGAAATTCCTGATATTAAAGATCCAATTATTTATTTTGAAATGGATCCAACTAACAAGAATCGTGCCTTTGCCA	13.878	2.351
C1_12490W_B-T_2722474_2722881_408	C1_12490W_B	C1_12490W_B	Ca22chr1B_C_albicans_SC5314	+	ATG	2722474-2722881	MRNNNWNWLIFLVPFILSLTTAYTPDISVVKNKSPAREIKYFDDSSNLLVLRDEHLLISKNDGKSFEEIPDIKDPIIYFEMDPTNKNRAFAMTLSXXXXXXQKIKVINGGHLKLIFSMVKWHQFLKLLLILKIQII	ATGAGGAATAATAATTGGAATTGGCTAATATTCTTGGTGCCATTTATTTTATCCTTAACAACTGCTTATACTCCAGATATATCAGTTGTTAAAAACAAATCACCAGCAAGAGAAATTAAATATTTTGATGATTCTTCCAATTTATTAGTTTTAAGAGATGAACATCTTTTGATCTCGAAAAATGACGGTAAATCATTTGAAGAAATTCCTGATATTAAAGATCCAATTATTTATTTTGAAATGGATCCAACTAACAAGAATCGTGCCTTTGCCATGACACTTTCTCNNNNNNNNNNNNNNNNACAGAAGATCAAGGTAATAAATGGCGGACATTTGAAATTGATATTTTCAATGGTGAAATGGCATCAATTCCTAAAATTACTTTTAATTTTGAAAATC…	0.683333	1.111
C1_13370W_A-T_2914712_2914882_171	C1_13370W_A	C1_13370W_A	Ca22chr1A_C_albicans_SC5314	+	ATG	2914712-2914882	MGMWWWWMWWKEWMVLVCLFVKSSIFKPKKKKKKKKKFTVKKKYFSNSSNPSFSSSS	ATGGGGATGTGGTGGTGGTGGATGTGGTGGAAGGAGTGGATGGTATTAGTTTGTTTGTTTGTGAAGAGCAGCATCTTTAAACCAAAAAAAAAAAAAAAAAAAAAAAAAAAATTCACCGTAAAGAAAAAATATTTTTCAAATTCATCAAATCCATCCTTTTCATCATCATCT	4.80167	0.343667
C1_13620W_A-T_2992921_2993016_96	C1_13620W_A	ROB1	Ca22chr1A_C_albicans_SC5314	+	ATT	2992921-2993016	IPTHTKFCLPFPFNFVSYCINIYMWIIFPPPF	ATTCCAACACACACAAAATTTTGCCTTCCTTTTCCTTTCAACTTTGTTTCATATTGTATAAATATATATATGTGGATAATTTTTCCACCACCTTTT	15.971	21.129
C1_13620W_A-T_2993020_2993115_96	C1_13620W_A	ROB1	Ca22chr1A_C_albicans_SC5314	+	ACG	2993020-2993115	TKKKKSEIRNKLRNQKKNTRSLKLKKKYKERF	ACGAAAAAAAAAAAATCGGAAATTAGAAATAAACTTAGAAACCAAAAAAAAAACACGAGAAGTCTAAAACTAAAAAAAAAATATAAAGAACGATTC	19.8487	51.0233
C1_13620W_A-T_2992901_2992978_78	C1_13620W_A	ROB1	Ca22chr1A_C_albicans_SC5314	+	ATT	2992901-2992978	IIQEARTFQHTQNFAFLFLSTLFHIV	ATTATCCAAGAAGCTAGAACATTCCAACACACACAAAATTTTGCCTTCCTTTTCCTTTCAACTTTGTTTCATATTGTA	3.286	16.4513
C1_13620W_A-T_2992908_2993042_135	C1_13620W_A	ROB1	Ca22chr1A_C_albicans_SC5314	+	AAG	2992908-2993042	KKLEHSNTHKILPSFSFQLCFILYKYIYVDNFSTTFLNEKKKIGN	AAGAAGCTAGAACATTCCAACACACACAAAATTTTGCCTTCCTTTTCCTTTCAACTTTGTTTCATATTGTATAAATATATATATGTGGATAATTTTTCCACCACCTTTTTAAACGAAAAAAAAAAAATCGGAAAT	12.5817	20.6623
C1_13780W_A-T_3025743_3025892_150	C1_13780W_A	MYO2	Ca22chr1A_C_albicans_SC5314	+	ATT	3025743-3025892	IYFLLIISLRFQSFPFPFLFDLFGKIQPNDSYFFFKKEDKTRHYRVKIVH	ATTTATTTTTTATTAATTATCAGCCTTCGTTTTCAATCCTTTCCTTTCCCTTTTTTGTTTGATCTCTTTGGAAAAATACAACCAAACGATTCCTATTTTTTTTTTAAAAAAGAAGATAAAACGAGACATTATAGAGTGAAGATTGTACAT	3.063	19.037
C1_13780W_A-T_3025712_3025801_90	C1_13780W_A	MYO2	Ca22chr1A_C_albicans_SC5314	+	ATT	3025712-3025801	ICCCCFSVFKYLFFINYQPSFSILSFPFFV	ATTTGTTGTTGTTGTTTTTCAGTTTTCAAATATTTATTTTTTATTAATTATCAGCCTTCGTTTTCAATCCTTTCCTTTCCCTTTTTTGTT	1.431	2.67633
C1_14130W_A-T_3113378_3113437_60	C1_14130W_A	FTR1	Ca22chr1A_C_albicans_SC5314	+	ATC	3113378-3113437	ISLLIERNYQIFTFKALFVN	ATCTCCCTCCTTATTGAAAGAAATTATCAAATCTTTACATTTAAAGCTTTGTTTGTGAAT	1.794	55.7063
C1_14520W_A-T_3178654_3178785_132	C1_14520W_A	C1_14520W_A	Ca22chr1A_C_albicans_SC5314	+	GTG	3178654-3178785	VGVMKLSCTRTNCHKYFPRRKFSHFLTMDSSSSVCPRMQASSSL	GTGGGCGTAATGAAACTATCGTGTACTAGGACTAATTGTCACAAATATTTCCCGAGAAGAAAATTTTCACATTTCCTGACCATGGATTCCAGCTCCAGTGTGTGTCCCAGAATGCAAGCGAGTTCCAGTTTA	0	4.965
C1_14520W_A-T_3178969_3179064_96	C1_14520W_A	C1_14520W_A	Ca22chr1A_C_albicans_SC5314	+	ATT	3178969-3179064	IIPYKPDYGGGIFSGSAIWLLVWRWLVSVGLF	ATTATTCCATACAAGCCGGACTACGGGGGTGGTATTTTTTCTGGATCAGCAATTTGGTTGTTGGTGTGGCGATGGCTAGTGAGTGTGGGGTTGTTC	0	1.85833
C1_14520W_A-T_3179314_3179379_66	C1_14520W_A	C1_14520W_A	Ca22chr1A_C_albicans_SC5314	+	GTG	3179314-3179379	VWLFPSLTRTFTMWSTSCWWLH	GTGTGGTTGTTTCCCAGTCTAACACGTACATTTACTATGTGGAGTACCTCTTGTTGGTGGTTGCAC	3.04833	3.70567
C1_14520W_A-T_3178739_3178822_84	C1_14520W_A	C1_14520W_A	Ca22chr1A_C_albicans_SC5314	+	ATT	3178739-3178822	IPAPVCVPECKRVPVYDRVQRVRQVPDI	ATTCCAGCTCCAGTGTGTGTCCCAGAATGCAAGCGAGTTCCAGTTTATGATAGAGTGCAGAGAGTTCGACAAGTCCCAGATATA	0.984	7.361
C1_14520W_A-T_3179207_3179332_126	C1_14520W_A	C1_14520W_A	Ca22chr1A_C_albicans_SC5314	+	ATG	3179207-3179332	MRWWGQWWKYKLRLTNNLVILLGVLLMNSVLSRPNQCGCFPV	ATGCGGTGGTGGGGTCAGTGGTGGAAGTACAAACTGAGGCTGACAAATAACTTGGTGATTCTGTTGGGGGTATTGTTGATGAATAGCGTGCTGAGTCGACCAAACCAGTGTGGTTGTTTCCCAGTC	2.16633	2.47033
C1_14520W_A-T_3178920_3179090_171	C1_14520W_A	C1_14520W_A	Ca22chr1A_C_albicans_SC5314	+	ATT	3178920-3179090	ISTRKDTMRWGRTWPSNYSIQAGLRGWYFFWISNLVVGVAMASECGVVLELKVQQCV	ATTTCAACCAGAAAAGACACGATGAGGTGGGGACGTACCTGGCCAAGCAATTATTCCATACAAGCCGGACTACGGGGGTGGTATTTTTTCTGGATCAGCAATTTGGTTGTTGGTGTGGCGATGGCTAGTGAGTGTGGGGTTGTTCTAGAGCTCAAGGTGCAGCAATGTGTT	0	3.12033
C1_14520W_A-T_3179316_3179495_180	C1_14520W_A	C1_14520W_A	Ca22chr1A_C_albicans_SC5314	+	GTG	3179316-3179495	VVVSQSNTYIYYVEYLLLVVALVVPAKTQAIEFAEEKSYMMDTSSDISLPTPRCRVLLRP	GTGGTTGTTTCCCAGTCTAACACGTACATTTACTATGTGGAGTACCTCTTGTTGGTGGTTGCACTAGTGGTTCCGGCAAAAACCCAGGCCATTGAGTTTGCTGAGGAGAAGAGTTATATGATGGATACGAGTTCAGATATATCACTACCAACCCCAAGATGTCGAGTACTGTTACGACCC	1.71567	7.75667
C2_00140W_A-T_19202_19468_267	C2_00140W_A	NDT80	Ca22chr2A_C_albicans_SC5314	+	ATC	19202-19468	ISILPSSFQALYFRRYHIVTIKVFSKPTHIPLRDTRFLSTTEKKRKIISQSPDSINNKKFFLFPFFFTTPTDIYESNSCQNDEHAQRRS	ATCTCCATATTACCATCTTCCTTTCAAGCTTTATACTTCAGGAGATATCATATCGTTACTATCAAGGTATTTAGCAAACCAACACATATACCTTTGCGTGATACCAGATTCTTGTCGACAACCGAAAAAAAAAGAAAGATAATTTCACAAAGTCCAGACAGCATCAACAACAAAAAGTTTTTTTTGTTTCCCTTTTTTTTTACGACACCAACCGATATATATGAATCAAACTCTTGTCAGAATGATGAACATGCCCAACGAAGATCC	9.995	7.431
C2_00140W_A-T_19227_19340_114	C2_00140W_A	NDT80	Ca22chr2A_C_albicans_SC5314	+	AAG	19227-19340	KLYTSGDIISLLSRYLANQHIYLCVIPDSCRQPKKKER	AAGCTTTATACTTCAGGAGATATCATATCGTTACTATCAAGGTATTTAGCAAACCAACACATATACCTTTGCGTGATACCAGATTCTTGTCGACAACCGAAAAAAAAAGAAAGA	5.98067	7.51333
C2_00140W_A-T_19309_19422_114	C2_00140W_A	NDT80	Ca22chr2A_C_albicans_SC5314	+	ATT	19309-19422	ILVDNRKKKKDNFTKSRQHQQQKVFFVSLFFYDTNRYI	ATTCTTGTCGACAACCGAAAAAAAAAGAAAGATAATTTCACAAAGTCCAGACAGCATCAACAACAAAAAGTTTTTTTTGTTTCCCTTTTTTTTTACGACACCAACCGATATATA	18.367	6.07867
C2_00400C_A-T_57805_57870_66	C2_00400C_A	C2_00400C_A	Ca22chr2A_C_albicans_SC5314	-	ATA	57805-57870	ITIFIRGRNHINIQHIPFYIFI	ATAACCATATTCATTAGAGGTCGTAACCACATTAATATTCAACACATACCATTTTACATATTCATA	38.8783	9.76433
C2_00610C_A-T_98334_98408_75	C2_00610C_A	ATP18	Ca22chr2A_C_albicans_SC5314	-	ATA	98334-98408	INMGSLPRYPFPVLKTYWPYAIGGM	ATAAATATGGGTTCCCTTCCAAGATATCCTTTCCCAGTTTTGAAAACTTACTGGCCATACGCTATTGGTGGTATG	187.382	76.7037
C2_00610C_A-T_98273_98350_78	C2_00610C_A	ATP18	Ca22chr2A_C_albicans_SC5314	-	ACG	98273-98350	TLLVVCKTSCWIHILPVIVIDIGQLI	ACGCTATTGGTGGTATGTAAAACATCATGTTGGATTCATATATTGCCTGTGATAGTGATTGACATTGGACAACTAATC	74.496	19.4833
C2_00610C_A-T_98302_98412_111	C2_00610C_A	ATP18	Ca22chr2A_C_albicans_SC5314	-	ATA	98302-98412	INKYGFPSKISFPSFENLLAIRYWWYVKHHVGFIYCL	ATAAATAAATATGGGTTCCCTTCCAAGATATCCTTTCCCAGTTTTGAAAACTTACTGGCCATACGCTATTGGTGGTATGTAAAACATCATGTTGGATTCATATATTGCCTG	129.634	55.0603
C2_00700W_A-T_116772_116831_60	C2_00700W_A	C2_00700W_A	Ca22chr2A_C_albicans_SC5314	+	GTG	116772-116831	VGGLLWLYSDGIYLESTRYC	GTGGGAGGTCTGCTCTGGCTCTACTCAGACGGAATTTACCTAGAATCAACTCGGTATTGT	0	19.758
C2_00700W_A-T_116838_116906_69	C2_00700W_A	C2_00700W_A	Ca22chr2A_C_albicans_SC5314	+	ATT	116838-116906	IYMHLPNYSRIEHLKIGTKTWLK	ATTTACATGCATCTTCCCAACTATTCAAGAATAGAACACCTGAAAATTGGCACGAAGACTTGGCTAAAA	71.497	54.8397
C2_00700W_A-T_116747_116992_246	C2_00700W_A	C2_00700W_A	Ca22chr2A_C_albicans_SC5314	+	ATG	116747-116992	MISILTRSSGRSALALLRRNLPRINSVLLRNLHASSQLFKNRTPENWHEDLAKIKRKYKNFSLPFEPTVSNPVIKLSSSP	ATGATTTCAATACTCACGAGAAGTAGTGGGAGGTCTGCTCTGGCTCTACTCAGACGGAATTTACCTAGAATCAACTCGGTATTGTTGAGAAATTTACATGCATCTTCCCAACTATTCAAGAATAGAACACCTGAAAATTGGCACGAAGACTTGGCTAAAATAAAACGAAAATATAAGAATTTCAGTCTTCCCTTTGAACCCACAGTTTCTAATCCAGTGATTAAACTTTCTTCAAGTCCATYMAWA	24.532	22.355
C2_00930C_A-T_155240_155335_96	C2_00930C_A	VPS24	Ca22chr2A_C_albicans_SC5314	-	TTG	155240-155335	LFTSAKENKTIEQEINLDLPTTSTTTSKHGLH	TTGTTCACATCAGCAAAGGAAAATAAAACCATTGAACAAGAAATAAACCTCGACCTACCAACAACATCAACAACAACAAGCAAACATGGATTACAT	7.78867	0.617667
C2_00930C_A-T_155148_155270_123	C2_00930C_A	VPS24	Ca22chr2A_C_albicans_SC5314	-	ATC	155148-155270	INNNKQTWITLKRKYMGQIPKNRYVKNLFLLKCYAIPIKVN	ATCAACAACAACAAGCAAACATGGATTACATTAAAAAGAAAATATATGGGCCAGATCCCAAAGAACAGGTATGTGAAAAACTTATTTCTATTAAAGTGTTATGCAATTCCAATCAAAGTAAAC	19.9587	17.0667
C2_01200C_A-T_198783_198848_66	C2_01200C_A	REG1	Ca22chr2A_C_albicans_SC5314	-	CTG	198783-198848	LLPLLPFFILVFISFHLLFIFN	CTGCTCCCTCTACTCCCTTTTTTTATCCTTGTTTTTATTTCTTTCCATTTGTTATTTATATTCAAC	8.058	1.68433
C2_01200C_A-T_198687_198758_72	C2_01200C_A	REG1	Ca22chr2A_C_albicans_SC5314	-	ATA	198687-198758	ILLYYLKTFPLLNLRLNSNYGEVK	ATACTTTTATATTATCTTAAAACTTTTCCTTTACTCAATCTCAGACTCAACTCAAACTACGGTGAAGTGAAG	2.67867	12.0553
C2_01200C_A-T_198411_198677_267	C2_01200C_A	REG1	Ca22chr2A_C_albicans_SC5314	-	ATA	198411-198677	IGITNNLYIGQNYFKNPNLIRSLYLLAHFSYSYIHTYIHLFIYSFFLLVFFSSHTHITHLYRCRCRWYQLFLLFFFSYLESPLFYIYIY	ATAGGGATTACAAATAACTTATATATTGGACAGAATTATTTCAAAAACCCCAATCTTATACGGAGTTTATACCTGTTGGCACATTTCAGTTATTCATATATACATACTTACATTCACTTATTCATTTATTCATTTTTTTTACTTGTTTTTTTTTCTTCCCACACACACATAACCCATCTTTATCGTTGTCGTTGTCGTTGGTATCAGTTATTCCTTTTATTTTTTTTTTCCTACTTAGAATCCCCGTTGTTTTATATTTATATTTAT	0.403	14.666
C2_01200C_A-T_198692_198889_198	C2_01200C_A	REG1	Ca22chr2A_C_albicans_SC5314	-	AAG	198692-198889	KINLQLINLQQPNNCSLYSLFLSLFLFLSICYLYSTKPILHKQLYFYIILKLFLYSISDSTQTTVK	AAGATTAATCTCCAATTAATTAATTTACAACAACCAAATAACTGCTCCCTCTACTCCCTTTTTTTATCCTTGTTTTTATTTCTTTCCATTTGTTATTTATATTCAACTAAACCAATACTACACAAACAGCTATACTTTTATATTATCTTAAAACTTTTCCTTTACTCAATCTCAGACTCAACTCAAACTACGGTGAAG	5.45033	5.22567
C2_01200C_A-T_198509_198664_156	C2_01200C_A	REG1	Ca22chr2A_C_albicans_SC5314	-	ATA	198509-198664	ITYILDRIISKTPILYGVYTCWHISVIHIYILTFTYSFIHFFYLFFFLPTHT	ATAACTTATATATTGGACAGAATTATTTCAAAAACCCCAATCTTATACGGAGTTTATACCTGTTGGCACATTTCAGTTATTCATATATACATACTTACATTCACTTATTCATTTATTCATTTTTTTTACTTGTTTTTTTTTCTTCCCACACACACA	0.23	21.45
C2_01200C_A-T_198443_198502_60	C2_01200C_A	REG1	Ca22chr2A_C_albicans_SC5314	-	ATC	198443-198502	IFIVVVVVGISYSFYFFFPT	ATCTTTATCGTTGTCGTTGTCGTTGGTATCAGTTATTCCTTTTATTTTTTTTTTCCTACT	1.196	9.30667
C2_01200C_A-T_198742_198867_126	C2_01200C_A	REG1	Ca22chr2A_C_albicans_SC5314	-	ATT	198742-198867	IYNNQITAPSTPFFYPCFYFFPFVIYIQLNQYYTNSYTFILS	ATTTACAACAACCAAATAACTGCTCCCTCTACTCCCTTTTTTTATCCTTGTTTTTATTTCTTTCCATTTGTTATTTATATTCAACTAAACCAATACTACACAAACAGCTATACTTTTATATTATCT	7.908	1.02933
C2_01410C_A-T_250482_250670_189	C2_01410C_A	CLB2	Ca22chr2A_C_albicans_SC5314	-	ATC	250482-250670	INHPPFPPFPFFYRETYSNYSSNKILLDLLTHDTINFNSLINQRTSQTKINSHLYSLFVIFIS	ATCAATCATCCCCCATTCCCCCCTTTCCCTTTTTTTTATAGAGAAACTTATTCCAATTACTCATCGAACAAGATCTTACTGGACTTGTTGACTCACGACACAATAAATTTTAATTCATTAATCAACCAACGAACCAGCCAAACCAAAATTAATTCACATTTATACTCACTGTTTGTCATTTTCATCTCA	5.67067	2.55
C2_01410C_A-T_250583_250717_135	C2_01410C_A	CLB2	Ca22chr2A_C_albicans_SC5314	-	ATC	250583-250717	IFFLLYDSSILSNLISSIIPHSPLSLFFIEKLIPITHRTRSYWTC	ATCTTCTTCTTGTTATATGATTCATCAATATTATCTAATTTAATTTCATCAATCATCCCCCATTCCCCCCTTTCCCTTTTTTTTATAGAGAAACTTATTCCAATTACTCATCGAACAAGATCTTACTGGACTTGT	7.673	3.46
C2_01600C_A-T_286632_286796_165	C2_01600C_A	CDC55	Ca22chr2A_C_albicans_SC5314	-	TTG	286632-286796	LFNFFCFYKLHYQFQSSNHFFFLFGSISIGQRQITTQQLQPSISQFLITTEAFKL	TTGTTCAATTTTTTTTGTTTCTACAAATTACATTATCAATTTCAAAGTTCCAATCATTTTTTTTTTCTTTTTGGATCCATATCCATTGGTCAACGTCAAATCACAACACAACAGCTTCAGCCATCAATTTCTCAATTCCTTATAACAACTGAAGCCTTTAAACTT	17.4773	4.108
C2_01600C_A-T_286655_286789_135	C2_01600C_A	CDC55	Ca22chr2A_C_albicans_SC5314	-	ATT	286655-286789	IFFVSTNYIINFKVPIIFFFFLDPYPLVNVKSQHNSFSHQFLNSL	ATTTTTTTTGTTTCTACAAATTACATTATCAATTTCAAAGTTCCAATCATTTTTTTTTTCTTTTTGGATCCATATCCATTGGTCAACGTCAAATCACAACACAACAGCTTCAGCCATCAATTTCTCAATTCCTTA	20.749	4.82867
C2_01600C_A-T_286568_286648_81	C2_01600C_A	CDC55	Ca22chr2A_C_albicans_SC5314	-	CTG	286568-286648	LKPLNFKKYLSVPLTSVSSIASTKSQI	CTGAAGCCTTTAAACTTTAAGAAATACCTTAGTGTCCCATTAACAAGTGTATCATCAATCGCATCAACAAAATCACAAATA	1.77167	5.962
C2_01600C_A-T_286648_286809_162	C2_01600C_A	CDC55	Ca22chr2A_C_albicans_SC5314	-	ATT	286648-286809	ILKIVVQFFLFLQITLSISKFQSFFFSFWIHIHWSTSNHNTTASAINFSIPYNN	ATTCTTAAAATAGTTGTTCAATTTTTTTTGTTTCTACAAATTACATTATCAATTTCAAAGTTCCAATCATTTTTTTTTTCTTTTTGGATCCATATCCATTGGTCAACGTCAAATCACAACACAACAGCTTCAGCCATCAATTTCTCAATTCCTTATAACAAC	17.801	4.06967
C2_01780W_A-T_327452_327622_171	C2_01780W_A	MSB2	Ca22chr2A_C_albicans_SC5314	+	CTG	327452-327622	LKDTYFPFILYPVYLNYSLSNLVYYNLFQHSVNSFFYFKKQITNYYSFFKVKQKNSN	CTGAAGGATACCTATTTCCCTTTTATTTTATATCCAGTTTATTTGAACTATTCGTTATCAAATTTAGTTTATTATAATTTGTTTCAACATTCAGTGAATTCTTTTTTTTATTTCAAGAAACAAATAACCAACTACTATTCATTCTTTAAAGTAAAACAAAAAAATTCCAAC	0.805667	11.96
C2_01780W_A-T_327030_327179_150	C2_01780W_A	MSB2	Ca22chr2A_C_albicans_SC5314	+	ATT	327030-327179	ITTTTTTLFILLLISFTNLINLIFVYFDTHPFLNYFNNQKLKESNTYREI	ATTACTACTACTACTACTACACTCTTCATTTTGTTGTTGATTTCATTTACAAATTTAATCAACTTGATTTTCGTCTATTTTGATACCCACCCCTTCCTCAACTACTTCAACAACCAAAAACTCAAAGAATCAAACACATACAGAGAAATA	28.493	14.1657
C2_01780W_A-T_327240_327371_132	C2_01780W_A	MSB2	Ca22chr2A_C_albicans_SC5314	+	ATA	327240-327371	ILTPKCFFFKEINFYFGCNNIQFIFKNSTSTLIQTYIIHSLFTN	ATATTAACACCAAAGTGTTTTTTTTTTAAAGAAATCAACTTTTATTTTGGTTGCAATAACATCCAATTCATTTTCAAAAATTCAACTTCAACTTTAATTCAAACTTACATTATTCATTCGCTTTTTACCAAC	0.543667	2.362
C2_01780W_A-T_327106_327201_96	C2_01780W_A	MSB2	Ca22chr2A_C_albicans_SC5314	+	ATT	327106-327201	ILIPTPSSTTSTTKNSKNQTHTEKYKRVKETF	ATTTTGATACCCACCCCTTCCTCAACTACTTCAACAACCAAAAACTCAAAGAATCAAACACATACAGAGAAATATAAGAGAGTGAAAGAAACATTT	61.4593	27.4577
C2_01780W_A-T_327268_327333_66	C2_01780W_A	MSB2	Ca22chr2A_C_albicans_SC5314	+	AAG	327268-327333	KKSTFILVAITSNSFSKIQLQL	AAGAAATCAACTTTTATTTTGGTTGCAATAACATCCAATTCATTTTCAAAAATTCAACTTCAACTT	0	3.096
C2_01780W_A-T_327406_327525_120	C2_01780W_A	MSB2	Ca22chr2A_C_albicans_SC5314	+	TTG	327406-327525	LITSFFFSFQFTKSYPEGYLFPFYFISSLFELFVIKFSLL	TTGATAACAAGTTTTTTTTTCAGTTTTCAATTTACAAAATCATACCCTGAAGGATACCTATTTCCCTTTTATTTTATATCCAGTTTATTTGAACTATTCGTTATCAAATTTAGTTTATTA	1.148	3.84733
C2_01800W_A-T_332304_332402_99	C2_01800W_A	C2_01800W_A	Ca22chr2A_C_albicans_SC5314	+	ATC	332304-332402	IIFYIYGEMLYRQFSFFFITGGIYLYNNMKTKY	ATCATATTTTATATCTATGGTGAAATGCTTTATAGACAATTTTCATTTTTTTTTATTACTGGTGGGATATATCTTTATAATAACATGAAAACAAAATAC	3.618	6.668
C2_01800W_A-T_332526_332633_108	C2_01800W_A	C2_01800W_A	Ca22chr2A_C_albicans_SC5314	+	ATA	332526-332633	IQTYFYYFVDLPKKKTLSFFFFSSFTISRRYPSIDL	ATACAAACATACTTTTACTATTTTGTTGATTTACCGAAAAAGAAAACCCTTTCTTTTTTTTTTTTTTCATCCTTTACTATTTCCCGTCGATACCCATCAATTGATCTA	0	4.991
C2_01800W_A-T_332664_332771_108	C2_01800W_A	C2_01800W_A	Ca22chr2A_C_albicans_SC5314	+	TTG	332664-332771	LLAFPFLLIDFELLPLSFIVIVIIVLLPLLLFLFNF	TTGCTTGCCTTCCCATTCCTATTGATTGATTTCGAATTATTACCATTATCATTTATCGTTATTGTTATTATCGTATTGCTACCACTACTTCTTTTTTTGTTTAATTTT	0	5.22167
C2_01800W_A-T_332032_332217_186	C2_01800W_A	C2_01800W_A	Ca22chr2A_C_albicans_SC5314	+	ATT	332032-332217	IGFNVTHYRRELIIIIYVLDPFETGNDNKRIMNILIIIYIYNFTHTYIYLRHGFCIVLRIIF	ATTGGTTTCAATGTAACCCACTATAGAAGAGAATTAATAATTATCATTTATGTGTTAGATCCATTTGAAACCGGGAACGATAATAAAAGAATAATGAATATCCTAATAATTATATATATATATAACTTCACACACACATATATATATCTTAGACATGGGTTTTGCATTGTATTGAGAATTATATTT	0.637333	17.045
C2_01800W_A-T_332263_332388_126	C2_01800W_A	C2_01800W_A	Ca22chr2A_C_albicans_SC5314	+	ATC	332263-332388	IKEREMIRTKTQNKSYFISMVKCFIDNFHFFLLLVGYIFIIT	ATCAAAGAAAGAGAAATGATTAGAACAAAAACACAGAACAAATCATATTTTATATCTATGGTGAAATGCTTTATAGACAATTTTCATTTTTTTTTATTACTGGTGGGATATATCTTTATAATAACA	1.59667	13.2973
C2_01800W_A-T_332464_332685_222	C2_01800W_A	C2_01800W_A	Ca22chr2A_C_albicans_SC5314	+	ATA	332464-332685	IFFYFLFFNFHHLFFSIIMYTYKHTFTILLIYRKRKPFLFFFFHPLLFPVDTHQLIYKTFYNDNYFSCLPSHSY	ATATTCTTTTATTTTTTATTTTTCAATTTTCATCATTTGTTTTTTAGTATTATTATGTATACATACAAACATACTTTTACTATTTTGTTGATTTACCGAAAAAGAAAACCCTTTCTTTTTTTTTTTTTTCATCCTTTACTATTTCCCGTCGATACCCATCAATTGATCTATAAAACATTTTATAATGATAATTATTTTTCTTGCTTGCCTTCCCATTCCTAT	0	3.346
C2_01800W_A-T_332689_332829_141	C2_01800W_A	C2_01800W_A	Ca22chr2A_C_albicans_SC5314	+	TTG	332689-332829	LISNYYHYHLSLLLLSYCYHYFFFCLIFEVSFILFYFLFFVFALTYI	TTGATTTCGAATTATTACCATTATCATTTATCGTTATTGTTATTATCGTATTGCTACCACTACTTCTTTTTTTGTTTAATTTTTGAAGTTTCATTTATTTTGTTTTATTTTTTGTTTTTTGTTTTTGCTTTGACTTATATA	0	3.44767
C2_01800W_A-T_332699_332764_66	C2_01800W_A	C2_01800W_A	Ca22chr2A_C_albicans_SC5314	+	ATT	332699-332764	IITIIIYRYCYYRIATTTSFFV	ATTATTACCATTATCATTTATCGTTATTGTTATTATCGTATTGCTACCACTACTTCTTTTTTTGTT	0	6.804
C2_01890W_A-T_350318_350461_144	C2_01890W_A	CTF1	Ca22chr2A_C_albicans_SC5314	+	ATT	350318-350461	IQIQSDIIIIIINFPKVILNNHYYQISTLNSKLKSQLLITNTHTQDKG	ATTCAAATTCAGTCCGATATTATTATTATTATTATTAATTTTCCCAAAGTGATATTAAATAATCATTATTATCAAATTAGTACACTAAATTCAAAACTCAAATCCCAACTACTAATAACCAACACACATACACAAGACAAAGGA	6.71933	0.665667
C2_01930C_A-T_361996_362076_81	C2_01930C_A	C2_01930C_A	Ca22chr2A_C_albicans_SC5314	-	ATC	361996-362076	IHFRCCLFFFIIKLNSFRSHLPPSLLK	ATCCACTTTCGTTGCTGTTTGTTTTTTTTTATAATTAAATTAAATTCCTTTCGTTCTCATCTTCCTCCCTCGCTGCTCAAA	1.70067	5.30067
C2_01930C_A-T_361891_361983_93	C2_01930C_A	C2_01930C_A	Ca22chr2A_C_albicans_SC5314	-	TTG	361891-361983	LYINYYFLPTNPPIFQTQPNPTHTTHTTFNN	TTGTATATTAATTACTACTTTCTCCCCACGAATCCACCAATATTTCAAACCCAACCCAACCCAACCCATACTACACATACCACATTCAATAAT	0.771667	12.6477
C2_01930C_A-T_361976_362038_63	C2_01930C_A	C2_01930C_A	Ca22chr2A_C_albicans_SC5314	-	ATT	361976-362038	IKFLSFSSSSLAAQIAIQLVY	ATTAAATTCCTTTCGTTCTCATCTTCCTCCCTCGCTGCTCAAATAGCAATTCAACTTGTATAT	2.18667	12.692
C2_02000W_A-T_386719_386811_93	C2_02000W_A	C2_02000W_A	Ca22chr2A_C_albicans_SC5314	+	AAG	386719-386811	KFCQFFCGLFFSSSLSLFFSLNNLLWVNIHI	AAGTTTTGTCAGTTTTTTTGTGGTTTATTTTTTTCGTCCTCCCTTTCATTATTTTTTTCCTTGAATAACCTACTTTGGGTTAACATACACATA	1.36433	2.715
C2_02000W_A-T_386696_386779_84	C2_02000W_A	C2_02000W_A	Ca22chr2A_C_albicans_SC5314	+	TTG	386696-386779	LNNWIAGKSFVSFFVVYFFRPPFHYFFP	TTGAATAATTGGATAGCAGGTAAAAGTTTTGTCAGTTTTTTTGTGGTTTATTTTTTTCGTCCTCCCTTTCATTATTTTTTTCCT	0.854333	1.947
C2_02170W_A-T_424880_424963_84	C2_02170W_A	C2_02170W_A	Ca22chr2A_C_albicans_SC5314	+	ATT	424880-424963	IIITIFNGYLISFLLTHFNYILRSTVIV	ATTATTATTACTATTTTCAACGGATATCTAATTTCTTTTCTTTTAACTCATTTCAACTACATACTTAGATCCACTGTAATTGTT	18.4263	10.301
C2_02200W_A-T_432365_432439_75	C2_02200W_A	C2_02200W_A	Ca22chr2A_C_albicans_SC5314	+	ATT	432365-432439	IFLFGIDIYYAPFPSAPLPPLINRG	ATTTTTTTGTTTGGGATCGACATATATTACGCTCCATTCCCCTCCGCCCCGCTTCCCCCCCTAATTAACAGAGGA	4.229	23.5867
C2_02200W_A-T_432506_432742_237	C2_02200W_A	C2_02200W_A	Ca22chr2A_C_albicans_SC5314	+	ATT	432506-432742	INHSLTHSLTHHSQQKRKSFYYYKTTFNNNSYIKLSTKFNTCFSLSIICIISYWGFTNIKKKRESKKQKAKGKRQTHKN	ATTAATCACTCACTCACTCACTCACTCACTCACCATTCTCAACAAAAAAGAAAATCCTTTTATTACTATAAGACTACATTTAACAATAATAGTTACATTAAACTATCAACAAAATTTAACACTTGCTTTTCTTTATCAATCATTTGTATCATATCATATTGGGGATTTACAAATATCAAAAAAAAAAGAGAGAGCAAAAAGCAAAAAGCAAAAGGCAAAAGGCAAACCCATAAGAAT	10.386	28.7997
C2_02200W_A-T_432752_432817_66	C2_02200W_A	C2_02200W_A	Ca22chr2A_C_albicans_SC5314	+	TTG	432752-432817	LDINLFLPNSHALCFFFFLIVV	TTGGATATAAATTTATTTTTGCCAAATTCACACGCACTTTGTTTTTTTTTTTTTCTGATTGTTGTG	13.8897	1.28367
C2_02200W_A-T_432821_432901_81	C2_02200W_A	C2_02200W_A	Ca22chr2A_C_albicans_SC5314	+	ATC	432821-432901	IGQPGVCPLFFHFLFLLKILLTKRDIK	ATCGGCCAGCCGGGAGTGTGTCCCCTTTTTTTTCATTTTCTTTTTCTTTTAAAGATTTTGTTGACAAAAAGAGATATCAAA	8.88433	6.70667
C2_02200W_A-T_432974_433042_69	C2_02200W_A	C2_02200W_A	Ca22chr2A_C_albicans_SC5314	+	ATA	432974-433042	ITKNNFHYLIQGEYSYYYHDQLI	ATAACAAAGAATAACTTTCATTATCTAATTCAAGGAGAGTATTCTTATTATTATCACGATCAATTAATT	1.31867	16.3417
C2_02200W_A-T_432357_432425_69	C2_02200W_A	C2_02200W_A	Ca22chr2A_C_albicans_SC5314	+	ATT	432357-432425	IRQFFCLGSTYITLHSPPPRFPP	ATTAGGCAATTTTTTTGTTTGGGATCGACATATATTACGCTCCATTCCCCTCCGCCCCGCTTCCCCCCC	4.07667	25.6913
C2_02200W_A-T_432495_432746_252	C2_02200W_A	C2_02200W_A	Ca22chr2A_C_albicans_SC5314	+	ATT	432495-432746	IKKILITHSLTHSLTILNKKENPFITIRLHLTIIVTLNYQQNLTLAFLYQSFVSYHIGDLQISKKKERAKSKKQKAKGKPIRIS	ATTAAAAAGATATTAATCACTCACTCACTCACTCACTCACTCACCATTCTCAACAAAAAAGAAAATCCTTTTATTACTATAAGACTACATTTAACAATAATAGTTACATTAAACTATCAACAAAATTTAACACTTGCTTTTCTTTATCAATCATTTGTATCATATCATATTGGGGATTTACAAATATCAAAAAAAAAAGAGAGAGCAAAAAGCAAAAAGCAAAAGGCAAAAGGCAAACCCATAAGAATTAGT	9.76767	27.9153
C2_02200W_A-T_432810_432869_60	C2_02200W_A	C2_02200W_A	Ca22chr2A_C_albicans_SC5314	+	TTG	432810-432869	LLCESASRECVPFFFIFFFF	TTGTTGTGTGAATCGGCCAGCCGGGAGTGTGTCCCCTTTTTTTTCATTTTCTTTTTCTTT	26.0763	6.79367
C2_02200W_A-T_432310_432429_120	C2_02200W_A	C2_02200W_A	Ca22chr2A_C_albicans_SC5314	+	CTG	432310-432429	LDISIFIFIDQCLLNRLGNFFVWDRHILRSIPLRPASPPN	CTGGATATTTCGATCTTTATATTTATAGATCAGTGTTTATTGAATAGATTAGGCAATTTTTTTGTTTGGGATCGACATATATTACGCTCCATTCCCCTCCGCCCCGCTTCCCCCCCTAAT	2.643	16.4707
C2_02200W_A-T_432628_432735_108	C2_02200W_A	C2_02200W_A	Ca22chr2A_C_albicans_SC5314	+	TTG	432628-432735	LLFFINHLYHIILGIYKYQKKKREQKAKSKRQKANP	TTGCTTTTCTTTATCAATCATTTGTATCATATCATATTGGGGATTTACAAATATCAAAAAAAAAAGAGAGAGCAAAAAGCAAAAAGCAAAAGGCAAAAGGCAAACCCA	10.1197	57.8417
C2_02200W_A-T_432766_432951_186	C2_02200W_A	C2_02200W_A	Ca22chr2A_C_albicans_SC5314	+	ATT	432766-432951	IFAKFTRTLFFFFSDCCVNRPAGSVSPFFSFSFSFKDFVDKKRYQIIFIQPQSQSHNNNRYY	ATTTTTGCCAAATTCACACGCACTTTGTTTTTTTTTTTTTCTGATTGTTGTGTGAATCGGCCAGCCGGGAGTGTGTCCCCTTTTTTTTCATTTTCTTTTTCTTTTAAAGATTTTGTTGACAAAAAGAGATATCAAATAATTTTTATACAACCACAATCACAGTCACACAATAACAATAGATATTAT	8.753	4.375
C2_02310W_A-T_460090_460161_72	C2_02310W_A	C2_02310W_A	Ca22chr2A_C_albicans_SC5314	+	ATA	460090-460161	IFNKSNFTLYKNTIILSFLWWEFI	ATATTCAATAAATCAAATTTCACTCTTTACAAGAACACAATAATCTTGAGTTTTCTTTGGTGGGAGTTTATT	2.029	9.014
C2_02860W_A-T_572840_572911_72	C2_02860W_A	SUR2	Ca22chr2A_C_albicans_SC5314	+	AAG	572840-572911	KEFYIFLFCVYPCSLSLASEAWTH	AAGGAATTCTATATATTTTTGTTCTGTGTTTATCCCTGTTCCTTATCCTTAGCATCGGAAGCTTGGACACAT	1.37933	11.5873
C2_03230C_A-T_664548_664628_81	C2_03230C_A	FEN12	Ca22chr2A_C_albicans_SC5314	-	CTG	664548-664628	LQFLLPFFFNIFLFANPTCSFPSFFIF	CTGCAATTTCTTTTACCATTCTTTTTTAACATTTTTCTTTTTGCAAATCCCACTTGTTCATTTCCTTCCTTCTTTATATTT	2.792	5.28833
C2_03330C_A-T_692748_692813_66	C2_03330C_A	HOG1	Ca22chr2A_C_albicans_SC5314	-	ATT	692748-692813	ILRVLDLKTFSRNHIVSSRVYL	ATTCTTCGAGTCTTAGATTTAAAAACGTTCTCTAGAAATCACATCGTATCATCTAGAGTATATTTA	1.92233	46.9643
C2_03370W_A-T_700462_700536_75	C2_03370W_A	THI20	Ca22chr2A_C_albicans_SC5314	+	AAG	700462-700536	KDRYAHKKKCLCPDSCCTTYRNRQS	AAGGATCGCTATGCGCATAAAAAAAAATGTTTATGCCCAGACTCTTGCTGTACCACATACAGAAATAGACAATCA	17.541	21.165
C2_03370W_A-T_700460_700609_150	C2_03370W_A	THI20	Ca22chr2A_C_albicans_SC5314	+	ATA	700460-700609	IRIAMRIKKNVYAQTLAVPHTEIDNHSAITSSTIDKLISVVIIKLNTLAL	ATAAGGATCGCTATGCGCATAAAAAAAAATGTTTATGCCCAGACTCTTGCTGTACCACATACAGAAATAGACAATCATAGCGCAATTACTAGTTCCACTATTGATAAATTGATATCGGTTGTTATTATAAAATTGAATACGCTTGCTTTA	8.77067	12.0893
C2_03390C_A-T_709539_709643_105	C2_03390C_A	HSP78	Ca22chr2A_C_albicans_SC5314	-	ATA	709539-709643	INLVLTTHTVNLFFFQKYTYFHSKYYIALKFRFRD	ATAAACCTGGTCTTAACCACACATACTGTTAATCTTTTTTTTTTCCAAAAGTATACATACTTTCACTCTAAATATTATATTGCACTTAAATTCCGTTTTAGAGAT	6.78667	0.665667
C2_03470C_A-T_724170_724292_123	C2_03470C_A	COX6	Ca22chr2A_C_albicans_SC5314	-	CTG	724170-724292	LFLLVHITSSFIVVSIPISNVFRYCPFCFEIKIICSSPKSF	CTGTTTTTATTAGTTCACATTACATCTTCATTTATCGTTGTATCTATTCCTATATCAAATGTTTTCCGCTACTGTCCGTTCTGCTTTGAGATCAAGATTATCTGCTCAAGTCCCAAGAGCTTC	153.461	132.742
C2_03470C_A-T_724355_724423_69	C2_03470C_A	COX6	Ca22chr2A_C_albicans_SC5314	-	ATT	724355-724423	ILQLNLKPFTDYSKSFPIQVSFE	ATTCTTCAACTCAACTTAAAACCATTTACAGATTATTCCAAATCTTTTCCCATTCAAGTATCATTTGAA	77.6003	45.7983
C2_03470C_A-T_724283_724351_69	C2_03470C_A	COX6	Ca22chr2A_C_albicans_SC5314	-	ATT	724283-724351	IITLERKKKKAKPRKLNNYHCFY	ATTATAACTTTGGAAAGAAAAAAAAAAAAAGCAAAGCCACGGAAATTGAATAATTATCACTGTTTTTAT	39.5457	13.9953
C2_03470C_A-T_724055_724255_201	C2_03470C_A	COX6	Ca22chr2A_C_albicans_SC5314	-	TTG	724055-724255	LYLFLYQMFSATVRSALRSRLSAQVPRASNTLRAVTISKPLTSQIRSYSSNHHEETFEEFTARYVIE	TTGTATCTATTCCTATATCAAATGTTTTCCGCTACTGTCCGTTCTGCTTTGAGATCAAGATTATCTGCTCAAGTCCCAAGAGCTTCTAACACTTTAAGAGCTGTCACTATCTCTAAACCATTGACTTCACAAATCAGATCTTATTCTTCAAACCATCACGAAGAAACTTTTGAAGAATTCACTGCTAGGTATGTTATTGAA	136.895	135.617
C2_03470C_A-T_724207_724302_96	C2_03470C_A	COX6	Ca22chr2A_C_albicans_SC5314	-	ATA	724207-724302	IIITVFISSHYIFIYRCIYSYIKCFPLLSVLL	ATAATTATCACTGTTTTTATTAGTTCACATTACATCTTCATTTATCGTTGTATCTATTCCTATATCAAATGTTTTCCGCTACTGTCCGTTCTGCTT	142.145	114.211
C2_03470C_A-T_724051_724113_63	C2_03470C_A	COX6	Ca22chr2A_C_albicans_SC5314	-	ATT	724051-724113	ILQTITKKLLKNSLLGMLLNN	ATTCTTCAAACCATCACGAAGAAACTTTTGAAGAATTCACTGCTAGGTATGTTATTGAATAAC	64.7007	93.4347
C2_03810C_A-T_805178_805258_81	C2_03810C_A	RPL21A	Ca22chr2A_C_albicans_SC5314	-	ATT	805178-805258	IFSNFRFNNPFLILIHQHIHQKWVNRM	ATTTTTTCAAATTTTCGTTTTAACAATCCTTTCTTGATACTAATTCACCAACATATACATCAAAAATGGGTAAATCGTATG	90.2087	79.163
C2_03810C_A-T_805096_805164_69	C2_03810C_A	RPL21A	Ca22chr2A_C_albicans_SC5314	-	AAG	805096-805164	KRYNGNVTLNDRMSSKDKRLKVM	AAGAGATATAATGGGAATGTGACATTAAACGATAGAATGAGTTCAAAGGACAAGAGATTGAAGGTTATG	0	6.93033
C2_03820C_A-T_806685_806759_75	C2_03820C_A	RPS9B	Ca22chr2A_C_albicans_SC5314	-	AAG	806685-806759	KQQIHQTPCHVCALLSLLLLTLKLN	AAGCAACAGATTCATCAGACACCATGCCACGTATGTGCTTTACTATCATTATTGTTACTAACGTTGAAGTTAAAC	1280.09	1192.53
C2_03820C_A-T_806550_806642_93	C2_03820C_A	RPS9B	Ca22chr2A_C_albicans_SC5314	-	CTG	806550-806642	LVVEVRVLLFSLTFSKNAFANTRNFFLHLIQ	CTGGTCGTTGAGGTTCGGGTCCTCCTATTTTCTTTGACATTTTCAAAGAATGCTTTTGCAAATACAAGAAACTTTTTCTTACATTTAATTCAG	0	1.91833
C2_03820C_A-T_806702_806764_63	C2_03820C_A	RPS9B	Ca22chr2A_C_albicans_SC5314	-	TTG	806702-806764	LLSNRFIRHHATYVLYYHYCY	TTGTTAAGCAACAGATTCATCAGACACCATGCCACGTATGTGCTTTACTATCATTATTGTTAC	1523.92	1419.56
C2_03820C_A-T_806609_806668_60	C2_03820C_A	RPS9B	Ca22chr2A_C_albicans_SC5314	-	ACG	806609-806668	TISELSSTSWSLRFGSSYFL	ACGATTTCAGAACTTTCGAGTACTTCCTGGTCGTTGAGGTTCGGGTCCTCCTATTTTCTT	0	4.08467
C2_03820C_A-T_806671_806736_66	C2_03820C_A	RPS9B	Ca22chr2A_C_albicans_SC5314	-	ATG	806671-806736	MPRMCFTIIIVTNVEVKLMKHF	ATGCCACGTATGTGCTTTACTATCATTATTGTTACTAACGTTGAAGTTAAACTAATGAAACACTTT	1044.67	1153.53
C2_03820C_A-T_806476_806616_141	C2_03820C_A	RPS9B	Ca22chr2A_C_albicans_SC5314	-	ATT	806476-806616	IFFDIFKECFCKYKKLFLTFNSVTELPTLQLQIIKITLYKLPLKRVQ	ATTTTCTTTGACATTTTCAAAGAATGCTTTTGCAAATACAAGAAACTTTTTCTTACATTTAATTCAGTAACTGAACTCCCGACACTTCAGTTACAAATAATTAAAATTACATTATACAAGCTCCCTCTTAAAAGGGTTCAA	0	1.633
C2_03880C_A-T_811721_811924_204	C2_03880C_A	C2_03880C_A	Ca22chr2A_C_albicans_SC5314	-	ATG	811721-811924	MDKKLSIQLNGSRKIIGILRGYDIFLNITLTDALEVDSKGEKMNIGATVCICFFRGVDEEGSFIEDKY	ATGGATAAAAAGTTATCAATACAGCTAAATGGATCAAGGAAAATTATTGGTATATTAAGAGGATATGACATATTTTTGAATATTACTTTGACAGATGCGTTGGAAGTTGATTCAAAAGGTGAAAAAATGAACATTGGAGCAACAGTATGTATTTGTTTTTTTAGGGGGGTGGATGAGGAGGGGAGTTTTATTGAAGACAAGTAC	8.329	4.78067
C2_03880C_A-T_812008_812076_69	C2_03880C_A	C2_03880C_A	Ca22chr2A_C_albicans_SC5314	-	ATT	812008-812076	ITTPYYNHHNLYSHNWKWYRNQN	ATTACTACTCCCTACTATAATCATCACAACTTATATTCACACAATTGGAAATGGTATCGGAACCAGAAT	5.95233	8.95667
C2_03880C_A-T_811900_812001_102	C2_03880C_A	C2_03880C_A	Ca22chr2A_C_albicans_SC5314	-	GTG	811900-812001	VYVISLDVFFRQLNVTNLLTTKKNSIWIKSYQYS	GTGTATGTGATTAGCTTAGATGTTTTTTTCAGACAATTAAATGTTACTAACTTGTTGACCACCAAAAAAAATAGTATATGGATAAAAAGTTATCAATACAGC	1.59567	1.59867
C2_03880C_A-T_811651_811791_141	C2_03880C_A	C2_03880C_A	Ca22chr2A_C_albicans_SC5314	-	TTG	811651-811791	LEQQYVFVFLGGWMRRGVLLKTSTNIKFLFLRSLGVTQLYQSRYVNI	TTGGAGCAACAGTATGTATTTGTTTTTTTAGGGGGGTGGATGAGGAGGGGAGTTTTATTGAAGACAAGTACTAACATTAAATTCTTGTTTTTAAGGTCATTAGGGGTAACTCAATTGTATCAATCGAGGTATGTTAACATT	8.519	16.7673
C2_03880C_A-T_811995_812060_66	C2_03880C_A	C2_03880C_A	Ca22chr2A_C_albicans_SC5314	-	ATA	811995-812060	IIITTYIHTIGNGIGTRIEKCM	ATAATCATCACAACTTATATTCACACAATTGGAAATGGTATCGGAACCAGAATTGAAAAGTGTATG	4.97067	15.0937
C2_03970W_A-T_832289_832351_63	C2_03970W_A	C2_03970W_A	Ca22chr2A_C_albicans_SC5314	+	TTG	832289-832351	LFFIFCVNLYIKIHNSLLIYM	TTGTTCTTCATTTTTTGTGTGAACTTGTACATTAAAATTCATAACTCATTATTAATATATATG	85.8727	170.082
C2_03970W_A-T_832367_832453_87	C2_03970W_A	C2_03970W_A	Ca22chr2A_C_albicans_SC5314	+	ATA	832367-832453	IKNIIGGKTRLNIQEKDVLDNKCKMLVVL	ATAAAGAATATCATAGGGGGAAAAACCAGATTAAACATTCAGGAAAAGGATGTATTAGATAATAAATGTAAAATGTTGGTTGTATTA	2.088	5.65933
C2_03970W_A-T_832336_832425_90	C2_03970W_A	C2_03970W_A	Ca22chr2A_C_albicans_SC5314	+	ATT	832336-832425	IINIYVKILKNKEYHRGKNQIKHSGKGCIR	ATTATTAATATATATGTAAAAATATTAAAAAATAAAGAATATCATAGGGGGAAAAACCAGATTAAACATTCAGGAAAAGGATGTATTAGA	3.83033	11.834
C2_04220C_A-T_886946_887035_90	C2_04220C_A	TAF14	Ca22chr2A_C_albicans_SC5314	-	ATT	886946-887035	IYFDLYIHIILLHKSFEFLLAQCQKYVDKQ	ATTTACTTTGATCTATATATACATATTATTTTGCTGCACAAGTCATTTGAATTTTTATTGGCACAATGTCAGAAGTATGTGGATAAACAA	12.442	6.56533
C2_04220C_A-T_886900_887043_144	C2_04220C_A	TAF14	Ca22chr2A_C_albicans_SC5314	-	AAG	886900-887043	KNQFTLIYIYILFCCTSHLNFYWHNVRSMWINNSNTLLQTLFIRCWKV	AAGAATCAATTTACTTTGATCTATATATACATATTATTTTGCTGCACAAGTCATTTGAATTTTTATTGGCACAATGTCAGAAGTATGTGGATAAACAATAGCAATACCCTCCTGCAAACTTTGTTTATTAGATGTTGGAAGGTC	7.77633	4.46367
C2_04240C_A-T_890136_890321_186	C2_04240C_A	HYM1	Ca22chr2A_C_albicans_SC5314	-	ACG	890136-890321	TIYFSFLPSELHTTNLLNIGKTIHLIFLSRNYYNLHSSFPSSKKKKEKNYDLHSNLLSFTRL	ACGATTTATTTCTCATTTCTTCCATCAGAGTTACACACAACTAATTTGCTTAATATTGGAAAAACTATTCACTTGATTTTCTTGTCACGAAACTACTACAACCTCCACTCTTCCTTCCCTTCAAGCAAAAAAAAAAAAGAAAAGAATTACGATCTACATTCTAATTTACTAAGTTTTACCCGCTTA	1.19233	3.14767
C2_04240C_A-T_890161_890235_75	C2_04240C_A	HYM1	Ca22chr2A_C_albicans_SC5314	-	ACG	890161-890235	TKLLQPPLFLPFKQKKKRKELRSTF	ACGAAACTACTACAACCTCCACTCTTCCTTCCCTTCAAGCAAAAAAAAAAAAGAAAAGAATTACGATCTACATTC	0.478333	6.42333
C2_04320W_A-T_903740_903817_78	C2_04320W_A	C2_04320W_A	Ca22chr2A_C_albicans_SC5314	+	ATA	903740-903817	IYVHTTYSGKIENQSMNSFFLYYLFT	ATATATGTACACACCACATACTCAGGTAAAATAGAAAATCAATCAATGAATTCTTTTTTTTTGTACTATCTATTTACA	30.1677	57.2133
C2_04400W_A-T_920534_920650_117	C2_04400W_A	C2_04400W_A	Ca22chr2A_C_albicans_SC5314	+	ATC	920534-920650	ILLFYSKIHSTRSLKSNPVYQYLFKVFTFKDLNTNITNK	ATCCTTCTATTTTATTCAAAGATACATTCAACTAGATCTTTGAAATCAAATCCAGTTTATCAATATTTATTCAAGGTGTTTACATTCAAGGATTTAAACACAAACATAACAAACAAA	5.86533	27.107
C2_04400W_A-T_920569_920667_99	C2_04400W_A	C2_04400W_A	Ca22chr2A_C_albicans_SC5314	+	ATC	920569-920667	IFEIKSSLSIFIQGVYIQGFKHKHNKQINKQSH	ATCTTTGAAATCAAATCCAGTTTATCAATATTTATTCAAGGTGTTTACATTCAAGGATTTAAACACAAACATAACAAACAAATAAATAAACAATCACAT	6.48533	32.485
C2_04500W_A-T_940361_940501_141	C2_04500W_A	C2_04500W_A	Ca22chr2A_C_albicans_SC5314	+	ATA	940361-940501	ISINFSQKKKATTIHQHQTKNLKIIQLYTTSLPFPLLLLLRYTSSVD	ATATCGATTAATTTTTCCCAAAAAAAAAAGGCAACGACAATTCATCAACACCAGACAAAAAATTTAAAAATCATCCAATTATACACTACCTCCCTCCCCTTTCCCCTATTATTACTATTACGCTATACATCATCTGTTGAT	13.6563	1.70833
C2_04500W_A-T_940485_940556_72	C2_04500W_A	C2_04500W_A	Ca22chr2A_C_albicans_SC5314	+	ATA	940485-940556	IHHLLIEHFFFLKERERVAHYPTP	ATACATCATCTGTTGATTGAACATTTTTTTTTTCTCAAAGAGAGAGAGAGAGTTGCACATTATCCTACTCCT	21.001	9.765
C2_04500W_A-T_940438_940497_60	C2_04500W_A	C2_04500W_A	Ca22chr2A_C_albicans_SC5314	+	ATT	940438-940497	IIHYLPPLSPIITITLYIIC	ATTATACACTACCTCCCTCCCCTTTCCCCTATTATTACTATTACGCTATACATCATCTGT	32.0933	3.335
C2_04500W_A-T_940501_940635_135	C2_04500W_A	C2_04500W_A	Ca22chr2A_C_albicans_SC5314	+	TTG	940501-940635	LNIFFFSKRERELHIILLLDIYIHDLTLFWVSIFFYSHKHPNINT	TTGAACATTTTTTTTTTCTCAAAGAGAGAGAGAGAGTTGCACATTATCCTACTCCTTGACATTTATATACACGACTTAACCTTATTTTGGGTTTCCATTTTTTTTTACAGCCACAAACATCCAAACATCAATACT	11.2007	5.23567
C2_04540C_A-T_951378_951575_198	C2_04540C_A	GDT1	Ca22chr2A_C_albicans_SC5314	-	ATT	951378-951575	IIINCIFPLTTPTNKKKIFLISNQTAKKKQHQSINQFHFHFNPKRPFLLIIITNSPFLSSSSYFFF	ATTATTATTAATTGTATCTTCCCGCTAACAACTCCGACAAACAAAAAAAAAATTTTTTTGATTTCCAATCAGACAGCAAAAAAAAAACAGCATCAATCAATCAACCAATTTCATTTTCATTTCAATCCTAAAAGACCCTTTTTATTAATAATCATTACAAACTCCCCTTTTCTTTCTTCTTCTTCTTATTTTTTCTTT	3.22367	22.8033
C2_04540C_A-T_951431_951508_78	C2_04540C_A	GDT1	Ca22chr2A_C_albicans_SC5314	-	ATC	951431-951508	IRQQKKNSINQSTNFIFISILKDPFY	ATCAGACAGCAAAAAAAAAACAGCATCAATCAATCAACCAATTTCATTTTCATTTCAATCCTAAAAGACCCTTTTTAT	0.353333	57.0773
C2_04540C_A-T_951367_951444_78	C2_04540C_A	GDT1	Ca22chr2A_C_albicans_SC5314	-	AAG	951367-951444	KTLFINNHYKLPFSFFFFLFFLLEAY	AAGACCCTTTTTATTAATAATCATTACAAACTCCCCTTTTCTTTCTTCTTCTTCTTATTTTTTCTTTTAGAAGCTTAT	8.183	57.695
C2_04650C_A-T_976249_976323_75	C2_04650C_A	RPB4	Ca22chr2A_C_albicans_SC5314	-	ATA	976249-976323	IIIIIIIIIIISFQKRLHLQLNLYI	ATAATCATTATCATTATCATTATCATTATCATTAGTTTTCAGAAAAGACTACACCTTCAATTAAATCTGTACATA	3.78033	6.228
C2_04650C_A-T_976113_976259_147	C2_04650C_A	RPB4	Ca22chr2A_C_albicans_SC5314	-	ATC	976113-976259	ICTYNQQHYLKKKKIIDQNKNPIIINLITIYIWTKTINHLLILSFLKPL	ATCTGTACATATAATCAACAACATTATTTAAAAAAAAAAAAAATTATTGATCAAAATAAAAACCCAATAATTATCAATCTAATTACAATCTACATTTGGACGAAAACAATAAATCATTTATTAATACTATCATTTTTAAAACCATTA	3.99033	0.680667
C2_04650C_A-T_976292_976381_90	C2_04650C_A	RPB4	Ca22chr2A_C_albicans_SC5314	-	ATC	976292-976381	IYILLLNWNRLSLHCFIIENNHYHYHYHYH	ATCTACATCTTGCTATTGAATTGGAATAGATTATCACTACATTGTTTTATAATAGAGAATAATCATTATCATTATCATTATCATTATCAT	1.62333	1.441
C2_04680W_A-T_980948_981043_96	C2_04680W_A	TIM17	Ca22chr2A_C_albicans_SC5314	+	ATA	980948-981043	ILINLTTFFFFPHLSPPFHTNRIILILILILI	ATATTAATTAATTTAACTACATTTTTTTTTTTTCCACACTTATCACCCCCTTTCCATACTAATAGAATAATACTCATACTCATACTCATACTTATA	5.64667	26.0557
C2_04950C_A-T_1033822_1033896_75	C2_04950C_A	CYT1	Ca22chr2A_C_albicans_SC5314	-	AAG	1033822-1033896	KKVGIVPNNYSNLFDFFLFSLRKII	AAGAAAGTAGGAATTGTTCCAAATAATTATTCCAACCTGTTTGATTTTTTTTTGTTTTCCCTTAGAAAGATAATT	41.232	30.6693
C2_04950C_A-T_1033687_1033812_126	C2_04950C_A	CYT1	Ca22chr2A_C_albicans_SC5314	-	AAG	1033687-1033812	KLFQSRENISFINNNDDNNNNNNNYDVNNIYFIEHIPIFTSL	AAGCTGTTTCAATCTAGAGAAAATATATCATTTATCAACAACAACGACGACAACAACAACAACAACAACAATTACGACGTTAATAACATCTATTTCATTGAACACATTCCAATTTTCACAAGTTTA	92.6053	87.3603
C2_05030C_A-T_1044292_1044366_75	C2_05030C_A	RHO3	Ca22chr2A_C_albicans_SC5314	-	GTG	1044292-1044366	VNNITQHDNYQRVNLFVFSKTFQNH	GTGAACAACATTACACAACACGACAATTATCAACGAGTCAACCTGTTCGTCTTTTCCAAAACTTTTCAAAATCAT	5.181	10.405
C2_05030C_A-T_1044193_1044288_96	C2_05030C_A	RHO3	Ca22chr2A_C_albicans_SC5314	-	AAG	1044193-1044288	KLFCHYFFFCFQFFYTSSLSRGLLFQFHQRVP	AAGTTATTTTGTCATTATTTTTTTTTTTGTTTTCAGTTCTTTTATACCAGTAGTCTAAGCCGAGGACTACTTTTTCAGTTTCATCAAAGGGTACCT	36.6723	10.673
C2_05030C_A-T_1044121_1044189_69	C2_05030C_A	RHO3	Ca22chr2A_C_albicans_SC5314	-	ATA	1044121-1044189	ISLKHASLWWWSKNKYVLRIRRR	ATATCATTAAAACATGCCTCTTTGTGGTGGTGGTCAAAAAACAAGTATGTATTGAGAATAAGGAGAAGA	0.399333	4.72633
C2_05030C_A-T_1044234_1044347_114	C2_05030C_A	RHO3	Ca22chr2A_C_albicans_SC5314	-	ACG	1044234-1044347	TTIINESTCSSFPKLFKIIKSYFVIIFFFVFSSFIPVV	ACGACAATTATCAACGAGTCAACCTGTTCGTCTTTTCCAAAACTTTTCAAAATCATTAAAAGTTATTTTGTCATTATTTTTTTTTTTGTTTTCAGTTCTTTTATACCAGTAGTC	21.6267	5.647
C2_05030C_A-T_1044239_1044379_141	C2_05030C_A	RHO3	Ca22chr2A_C_albicans_SC5314	-	ATA	1044239-1044379	IHSLSEQHYTTRQLSTSQPVRLFQNFSKSLKVILSLFFFLFSVLLYQ	ATACACTCTTTAAGTGAACAACATTACACAACACGACAATTATCAACGAGTCAACCTGTTCGTCTTTTCCAAAACTTTTCAAAATCATTAAAAGTTATTTTGTCATTATTTTTTTTTTTGTTTTCAGTTCTTTTATACCAG	3.99867	5.69233
C2_05030C_A-T_1044077_1044232_156	C2_05030C_A	RHO3	Ca22chr2A_C_albicans_SC5314	-	AAG	1044077-1044232	KPRTTFSVSSKGTLNIIKTCLFVVVVKKQVCIENKEKIGTRYITRLILDQEY	AAGCCGAGGACTACTTTTTCAGTTTCATCAAAGGGTACCTTAAATATCATTAAAACATGCCTCTTTGTGGTGGTGGTCAAAAAACAAGTATGTATTGAGAATAAGGAGAAGATAGGAACAAGATATATAACTAGACTAATCTTAGATCAGGAATAC	7.59133	8.611
C2_05260W_A-T_1083433_1083684_252	C2_05260W_A	BUD14	Ca22chr2A_C_albicans_SC5314	+	TTG	1083433-1083684	LNHLIHINFLIALFHIYTTTTTINIIIFIIHSFEKKIHLILFHFFFSFFTESIINTHRPLIFNNTHFNTVHPSPLPNTNLSTST	TTGAATCATCTAATTCACATTAACTTTCTTATAGCCTTATTTCACATCTATACAACCACTACTACCATTAACATCATCATCTTCATTATCCACTCCTTTGAAAAAAAAATTCATTTGATTTTATTTCACTTTTTTTTTTCTTTTTTTACAGAATCAATTATAAACACACACAGACCACTTATTTTTAACAACACACACTTCAACACAGTACACCCTTCCCCCCTTCCCAATACCAATCTATCCACATCTACC	2.056	1.17233
C2_05300C_A-T_1092437_1092499_63	C2_05300C_A	C2_05300C_A	Ca22chr2A_C_albicans_SC5314	-	AAG	1092437-1092499	KQIRSRCMYKHIKIDLLGSHI	AAGCAAATTCGTTCCAGATGTATGTATAAACATATAAAAATTGATTTATTAGGATCACATATT	116.947	24.347
C2_05300C_A-T_1092466_1092972_507	C2_05300C_A	C2_05300C_A	Ca22chr2A_C_albicans_SC5314	-	ATT	1092466-1092972	IMVVGKSNIILQSRHLSSTSICLRFNRRATMDKTVLLNEAKQFFGPTNVKGEHCKNKFFYPPQNNRPNYIVNDGRPLVGDQFPTKRPGRNSNNRERNPTVHPFPNNIYTKTAYLIPENIKDKIVEDATTNGLHPQEIAHKYSINLLRVEAILKLRDIESKFVPDVCINI	ATTATGGTTGTGGGGAAGTCTAATATAATACTGCAGTCGAGACATTTGTCTTCTACTTCAATATGCTTAAGATTCAATAGAAGAGCAACAATGGACAAGACTGTGTTGTTGAACGAAGCTAAACAGTTTTTCGGACCAACTAATGTCAAAGGTGAACATTGTAAAAACAAATTTTTCTATCCACCACAAAATAATAGACCAAATTATATAGTGAATGATGGAAGACCTTTAGTTGGTGATCAATTCCCAACGAAAAGACCAGGAAGAAATTCCAATAATAGAGAAAGAAACCCTACAGTACACCCTTTCCCTAATAATATTTACACGAAAACTGCATACTTGATACCAGAAAATATAAAGGATAAAATTGTTGAAGATGCAACTACTAATGGATTACAT…	54.573	29.206
C2_05300C_A-T_1092765_1092860_96	C2_05300C_A	C2_05300C_A	Ca22chr2A_C_albicans_SC5314	-	ACG	1092765-1092860	TKLNSFSDQLMSKVNIVKTNFSIHHKIIDQII	ACGAAGCTAAACAGTTTTTCGGACCAACTAATGTCAAAGGTGAACATTGTAAAAACAAATTTTTCTATCCACCACAAAATAATAGACCAAATTATA	27.3597	17.9933
C2_05300C_A-T_1092633_1092740_108	C2_05300C_A	C2_05300C_A	Ca22chr2A_C_albicans_SC5314	-	TTG	1092633-1092740	LVINSQRKDQEEIPIIEKETLQYTLSLIIFTRKLHT	TTGGTGATCAATTCCCAACGAAAAGACCAGGAAGAAATTCCAATAATAGAGAAAGAAACCCTACAGTACACCCTTTCCCTAATAATATTTACACGAAAACTGCATACT	70.117	17.663
C2_05300C_A-T_1092546_1092614_69	C2_05300C_A	C2_05300C_A	Ca22chr2A_C_albicans_SC5314	-	AGG	1092546-1092614	RIKLLKMQLLMDYILKKLLINIV	AGGATAAAATTGTTGAAGATGCAACTACTAATGGATTACATCCTCAAGAAATTGCTCATAAATATAGTA	27.0583	13.1213
C2_05640W_A-T_1149636_1149839_204	C2_05640W_A	C2_05640W_A	Ca22chr2A_C_albicans_SC5314	+	ATC	1149636-1149839	IILLIPRHHTPNTTQHTTSHIHIPSSVSNTQTRTTPIGFSFILLSFFHFYLFLIVISEREKKKQKTLG	ATCATATTACTAATACCTAGACATCACACACCAAACACAACACAACACACCACTTCACACATTCATATACCATCCAGCGTATCCAACACACAGACTAGAACAACTCCAATAGGATTTAGTTTTATTCTGCTTTCTTTCTTTCATTTTTACCTTTTCCTCATTGTCATTTCAGAGAGAGAAAAAAAAAAACAGAAAACTCTCGGA	4.83433	2.63633
C2_05640W_A-T_1149658_1149744_87	C2_05640W_A	C2_05640W_A	Ca22chr2A_C_albicans_SC5314	+	ATC	1149658-1149744	ITHQTQHNTPLHTFIYHPAYPTHRLEQLQ	ATCACACACCAAACACAACACAACACACCACTTCACACATTCATATACCATCCAGCGTATCCAACACACAGACTAGAACAACTCCAA	3.285	3.92467
C2_05660W_A-T_1156849_1156947_99	C2_05660W_A	PNG2	Ca22chr2A_C_albicans_SC5314	+	AAG	1156849-1156947	KFKYNIYPFNSITTTTTAIVFPIFLVIFLVDYY	AAGTTTAAATATAATATATACCCTTTCAATTCTATCACGACAACCACAACAGCTATTGTCTTTCCAATTTTTCTTGTCATTTTTTTAGTTGATTACTAT	1.08733	1.455
C2_05660W_A-T_1156859_1156933_75	C2_05660W_A	PNG2	Ca22chr2A_C_albicans_SC5314	+	ATA	1156859-1156933	IIYTLSILSRQPQQLLSFQFFLSFF	ATAATATATACCCTTTCAATTCTATCACGACAACCACAACAGCTATTGTCTTTCCAATTTTTCTTGTCATTTTTT	1.435	1.82133
C2_05660W_A-T_1156866_1156937_72	C2_05660W_A	PNG2	Ca22chr2A_C_albicans_SC5314	+	ATA	1156866-1156937	IPFQFYHDNHNSYCLSNFSCHFFS	ATACCCTTTCAATTCTATCACGACAACCACAACAGCTATTGTCTTTCCAATTTTTCTTGTCATTTTTTTAGT	1.495	1.89733
C2_05710C_A-T_1167900_1167965_66	C2_05710C_A	C2_05710C_A	Ca22chr2A_C_albicans_SC5314	-	AAG	1167900-1167965	KITKLLTMAESHRCMFKNESRL	AAGATAACTAAACTATTAACAATGGCTGAATCACACAGATGTATGTTCAAAAATGAAAGCAGACTA	145.446	332.956
C2_05710C_A-T_1167848_1167940_93	C2_05710C_A	C2_05710C_A	Ca22chr2A_C_albicans_SC5314	-	CTG	1167848-1167940	LNHTDVCSKMKADYSKLVETRRNYETKSFMK	CTGAATCACACAGATGTATGTTCAAAAATGAAAGCAGACTATAGCAAACTAGTAGAAACAAGAAGGAACTATGAAACTAAGTCATTTATGAAA	71.2447	68.5857
C2_05910W_A-T_1208055_1208144_90	C2_05910W_A	C2_05910W_A	Ca22chr2A_C_albicans_SC5314	+	ATA	1208055-1208144	ILYIREFCVVIHSLIDLTHQMLFTDYILYY	ATATTATACATTAGAGAGTTTTGTGTGGTTATACATAGCTTAATTGATTTGACCCATCAAATGCTCTTTACTGATTACATTCTTTATTAT	0.918333	3.75833
C2_05910W_A-T_1208023_1208094_72	C2_05910W_A	C2_05910W_A	Ca22chr2A_C_albicans_SC5314	+	TTG	1208023-1208094	LSLLESINNKEYYTLESFVWLYIA	TTGTCCTTGTTGGAAAGTATTAACAATAAAGAATATTATACATTAGAGAGTTTTGTGTGGTTATACATAGCT	0	3.92567
C2_05910W_A-T_1208159_1208218_60	C2_05910W_A	C2_05910W_A	Ca22chr2A_C_albicans_SC5314	+	ATT	1208159-1208218	IKKEKIVPNKVIAIITYLYK	ATTAAAAAGGAAAAGATTGTTCCAAACAAGGTCATAGCAATAATAACATATTTATATAAA	3.84467	1.05
C2_06020W_A-T_1232542_1232622_81	C2_06020W_A	CNT	Ca22chr2A_C_albicans_SC5314	+	ATT	1232542-1232622	IIVKITSSYMSYYLLTHNHKSYLQSVH	ATTATTGTTAAAATAACAAGTTCATACATGTCATATTATTTATTGACACATAATCATAAATCTTACCTTCAATCAGTCCAT	6.24567	22.91
C2_06020W_A-T_1232591_1232686_96	C2_06020W_A	CNT	Ca22chr2A_C_albicans_SC5314	+	ATA	1232591-1232686	IIINLTFNQSINSCLIKKNSPHKLFILAVFIF	ATAATCATAAATCTTACCTTCAATCAGTCCATTAATTCTTGTTTAATCAAGAAAAATTCTCCACATAAGTTATTTATCTTAGCTGTTTTTATTTTT	6.13067	19.9093
C2_06290C_A-T_1279284_1279346_63	C2_06290C_A	ATP14	Ca22chr2A_C_albicans_SC5314	-	ATA	1279284-1279346	IQSLDVLIESKMFRPVAVCIM	ATACAATCTTTAGACGTATTAATAGAATCAAAGATGTTTAGACCAGTTGCTGTATGTATAATG	243.988	199.827
C2_06390C_A-T_1304004_1304099_96	C2_06390C_A	IMH3	Ca22chr2A_C_albicans_SC5314	-	AAG	1304004-1304099	KHIVLIIFKSFLFLPPSTHSHFSQKKNNNNGV	AAGCATATAGTTCTTATTATCTTCAAATCCTTTCTATTTCTACCCCCTTCTACCCATTCCCATTTCTCCCAAAAAAAAAACAACAACAATGGTGTT	57.1037	57.426
C2_06390C_A-T_1303497_1303586_90	C2_06390C_A	IMH3	Ca22chr2A_C_albicans_SC5314	-	AGG	1303497-1303586	RFHFFPSHWYVSLICVCLFSEKRYHIILLL	AGGTTTCACTTCTTTCCCAGTCACTGGTATGTTTCTTTAATTTGTGTTTGTTTGTTTTCCGAAAAAAGGTATCACATTATACTATTACTC	98.5567	61.969
C2_06390C_A-T_1303550_1304044_495	C2_06390C_A	IMH3	Ca22chr2A_C_albicans_SC5314	-	ATT	1303550-1304044	IPISPKKKTTTMVFETSKATSYLKDYPKKDGLSVKELIDSTNFGGLTYNDFLILPGLINFPSSAVSLETKLTKKITLKSPFVSSPMDTVTEENMAIHMALLGGIGIIHHNCTSEEQAEMVRKVKKYENGFINDPVVISPEVTVGEVKKMGEVLGFTSFPVTGMFL	ATTCCCATTTCTCCCAAAAAAAAAACAACAACAATGGTGTTTGAAACTTCAAAAGCTACTTCTTATTTGAAAGATTACCCTAAGAAAGATGGTTTATCGGTCAAAGAATTGATTGATTCTACTAATTTTGGTGGGTTAACTTATAATGATTTCTTAATTTTACCAGGTTTAATCAATTTCCCTAGTTCAGCTGTTTCATTAGAAACTAAATTGACTAAAAAAATCACTTTGAAATCACCATTTGTTTCATCACCTATGGATACTGTTACTGAAGAAAATATGGCTATTCATATGGCATTATTGGGTGGTATTGGTATCATTCATCATAACTGTACTTCTGAAGAACAAGCAGAAATGGTTAGAAAAGTCAAAAAATACGAAAATGGATTCATTAATGAT…	116.49	81.8613
C2_06390C_A-T_1303978_1304073_96	C2_06390C_A	IMH3	Ca22chr2A_C_albicans_SC5314	-	ATC	1303978-1304073	ILSISTPFYPFPFLPKKKQQQWCLKLQKLLLI	ATCCTTTCTATTTCTACCCCCTTCTACCCATTCCCATTTCTCCCAAAAAAAAAACAACAACAATGGTGTTTGAAACTTCAAAAGCTACTTCTTATT	71.9867	50.2833
C2_06390C_A-T_1303588_1303803_216	C2_06390C_A	IMH3	Ca22chr2A_C_albicans_SC5314	-	TTG	1303588-1303803	LFHHLWILLLKKIWLFIWHYWVVLVSFIITVLLKNKQKWLEKSKNTKMDSLMIQLSFLLKSPLVKLKKWVKF	TTGTTTCATCACCTATGGATACTGTTACTGAAGAAAATATGGCTATTCATATGGCATTATTGGGTGGTATTGGTATCATTCATCATAACTGTACTTCTGAAGAACAAGCAGAAATGGTTAGAAAAGTCAAAAAATACGAAAATGGATTCATTAATGATCCAGTTGTCATTTCTCCTGAAGTCACCGTTGGTGAAGTTAAAAAAATGGGTGAAGTTT	165.497	110.848
C2_06390C_A-T_1303486_1303563_78	C2_06390C_A	IMH3	Ca22chr2A_C_albicans_SC5314	-	CTG	1303486-1303563	LVCFFNLCLFVFRKKVSHYTITLMIL	CTGGTATGTTTCTTTAATTTGTGTTTGTTTGTTTTCCGAAAAAAGGTATCACATTATACTATTACTCTGATGATTCTT	24.0567	6.68567
C2_06730W_A-T_1379277_1379369_93	C2_06730W_A	LSP1	Ca22chr2A_C_albicans_SC5314	+	ATC	1379277-1379369	INSYNKVIPFKVCFFPFTPLFLPPFLHINQN	ATCAATTCTTATAATAAAGTAATCCCTTTCAAGGTTTGTTTTTTTCCTTTTACCCCCCTCTTCCTCCCTCCGTTTCTTCATATTAATCAAAAT	57.1493	100.348
C2_06810C_A-T_1396090_1396308_219	C2_06810C_A	RPL11	Ca22chr2A_C_albicans_SC5314	-	ATG	1396090-1396308	MGNRDRTELIERVFFWGNGFNKIFQDWNQIMSDVKKSKYNKKFKSLKILCKYNDYQLQSTNRIKQKPAYNRYQ	ATGGGAAATAGAGATAGGACCGAATTAATTGAAAGAGTTTTCTTTTGGGGAAATGGGTTCAATAAGATTTTTCAAGATTGGAATCAAATTATGTCAGATGTGAAGAAGAGTAAATATAACAAGAAGTTCAAATCATTAAAAATTTTATGTAAATACAACGATTATCAATTACAGTCAACGAATAGAATAAAACAAAAGCCAGCATATAACAGATACCAG	0.463667	9.65033
C2_06810C_A-T_1396329_1396448_120	C2_06810C_A	RPL11	Ca22chr2A_C_albicans_SC5314	-	ATC	1396329-1396448	IFRLKSFERFVFSIVYPYNNCQRWYVQVFKEIEMFCFNWK	ATCTTTCGTTTGAAAAGTTTTGAAAGGTTCGTTTTCTCAATAGTATATCCATACAATAACTGCCAAAGATGGTATGTTCAAGTGTTTAAAGAGATCGAAATGTTTTGTTTTAATTGGAAG	235.379	204.996
C2_06810C_A-T_1396301_1396402_102	C2_06810C_A	RPL11	Ca22chr2A_C_albicans_SC5314	-	ATC	1396301-1396402	IHTITAKDGMFKCLKRSKCFVLIGSDIIMRKYGK	ATCCATACAATAACTGCCAAAGATGGTATGTTCAAGTGTTTAAAGAGATCGAAATGTTTTGTTTTAATTGGAAGTGATATCATAATGAGAAAATATGGGAAA	275.965	220.541
C2_07130C_A-T_1455493_1455591_99	C2_07130C_A	RCK2	Ca22chr2A_C_albicans_SC5314	-	ATT	1455493-1455591	IINTQHTIIVIFYLFLNTFFFAGVNTIDNIIYS	ATTATCAACACACAACACACAATTATCGTTATTTTCTACTTATTTTTGAATACGTTTTTTTTTGCTGGTGTTAATACTATAGATAACATTATTTATTCC	0.362333	1.95167
C2_07130C_A-T_1455438_1455509_72	C2_07130C_A	RCK2	Ca22chr2A_C_albicans_SC5314	-	ATA	1455438-1455509	ITLFIPSYTIGDYFICSLNETDHV	ATAACATTATTTATTCCTAGCTATACTATCGGTGATTATTTTATTTGCTCATTAAACGAAACTGACCATGTT	3.524	3.60267
C2_07170C_A-T_1464590_1464754_165	C2_07170C_A	AFT2	Ca22chr2A_C_albicans_SC5314	-	ATT	1464590-1464754	IYISTYLFMDFGRCWNQKEIFKLKIATNRAQLEIHLSHLHKYLVHTIVITLFPPW	ATTTATATATCTACATATTTATTTATGGATTTTGGGCGGTGTTGGAATCAAAAGGAAATCTTCAAACTGAAAATCGCAACAAACAGAGCACAACTTGAAATTCATCTATCGCATTTACACAAATATCTAGTTCATACGATTGTGATTACTTTGTTCCCACCTTGG	2.606	0.763667
C2_07170C_A-T_1464407_1464538_132	C2_07170C_A	AFT2	Ca22chr2A_C_albicans_SC5314	-	ATA	1464407-1464538	IDFTISQEPHTSISPPRISKKEPTYSITFQTANTSVALIVLNIQ	ATAGATTTTACGATTTCTCAGGAGCCACACACTTCAATCAGTCCACCACGGATAAGCAAAAAAGAACCAACATATAGCATAACTTTCCAAACAGCAAACACATCAGTGGCATTGATTGTGTTGAATATTCAA	0.271667	2.00967
C2_07370W_A-T_1505048_1505137_90	C2_07370W_A	C2_07370W_A	Ca22chr2A_C_albicans_SC5314	+	TTG	1505048-1505137	LSNKTLHNNNNETSFPKTPSSDILQQQHLL	TTGTCGAATAAGACATTACACAACAACAACAACGAGACATCTTTTCCCAAAACACCATCGTCCGACATTTTGCAACAACAACATCTACTT	1.92933	4.372
C2_07370W_A-T_1505055_1505174_120	C2_07370W_A	C2_07370W_A	Ca22chr2A_C_albicans_SC5314	+	ATA	1505055-1505174	IRHYTTTTTRHLFPKHHRPTFCNNNIYFKPISDPLGLSSL	ATAAGACATTACACAACAACAACAACGAGACATCTTTTCCCAAAACACCATCGTCCGACATTTTGCAACAACAACATCTACTTTAAACCTATAAGTGACCCCCTTGGTTTATCGAGCTTG	2.27467	3.89633
C2_07370W_A-T_1505062_1505145_84	C2_07370W_A	C2_07370W_A	Ca22chr2A_C_albicans_SC5314	+	ATT	1505062-1505145	ITQQQQRDIFSQNTIVRHFATTTSTLNL	ATTACACAACAACAACAACGAGACATCTTTTCCCAAAACACCATCGTCCGACATTTTGCAACAACAACATCTACTTTAAACCTA	2.067	4.68433
C2_07490W_A-T_1530716_1530793_78	C2_07490W_A	HEM15	Ca22chr2A_C_albicans_SC5314	+	ATA	1530716-1530793	ILDTFVTNKFTSDKLLTCYFKKTKDF	ATACTTGACACGTTCGTGACTAATAAGTTTACCAGTGATAAACTCTTGACGTGTTATTTTAAAAAAACAAAAGACTTC	2.11533	95.3487
C2_07690W_A-T_1569045_1569104_60	C2_07690W_A	C2_07690W_A	Ca22chr2A_C_albicans_SC5314	+	ATT	1569045-1569104	ICKYSYRVNVNSINLYLAVC	ATTTGTAAATATTCGTATAGAGTTAATGTAAATAGTATTAATCTATATCTAGCTGTGTGC	1.65533	38.326
C2_07750W_A-T_1585351_1585491_141	C2_07750W_A	RHO2	Ca22chr2A_C_albicans_SC5314	+	TTG	1585351-1585491	LSSSPFYFQFNIDLLSLREHLTSSTVAKQGVCEEKYFYTSIEFTVVV	TTGTCCAGTTCCCCTTTTTATTTTCAATTCAATATTGATTTGCTTTCTTTACGGGAACATTTGACATCTTCTACAGTAGCTAAACAAGGTGTGTGTGAAGAAAAATATTTCTACACATCAATAGAATTTACAGTAGTAGTC	4.479	1.081
C2_07750W_A-T_1585504_1585614_111	C2_07750W_A	RHO2	Ca22chr2A_C_albicans_SC5314	+	ATA	1585504-1585614	ITHFWSYNFSSFHESIFPFFYLPLQIYIYTDIHTTKQ	ATAACACATTTCTGGTCATATAATTTCAGTTCTTTTCACGAATCCATTTTCCCCTTTTTCTACCTCCCTTTGCAAATATATATATATACAGACATTCACACAACCAAACAA	0	8.398
C2_07750W_A-T_1585511_1585624_114	C2_07750W_A	RHO2	Ca22chr2A_C_albicans_SC5314	+	ATT	1585511-1585624	ISGHIISVLFTNPFSPFSTSLCKYIYIQTFTQPNNKVI	ATTTCTGGTCATATAATTTCAGTTCTTTTCACGAATCCATTTTCCCCTTTTTCTACCTCCCTTTGCAAATATATATATATACAGACATTCACACAACCAAACAATAAAGTCATA	0	8.14433
C2_07750W_A-T_1585545_1585628_84	C2_07750W_A	RHO2	Ca22chr2A_C_albicans_SC5314	+	ATC	1585545-1585628	IHFPLFLPPFANIYIYRHSHNQTIKSYR	ATCCATTTTCCCCTTTTTCTACCTCCCTTTGCAAATATATATATATACAGACATTCACACAACCAAACAATAAAGTCATATAGA	0	11.009
C2_07900W_A-T_1608043_1608174_132	C2_07900W_A	GDH2	Ca22chr2A_C_albicans_SC5314	+	ATT	1608043-1608174	IKVHSKGYFYTEAAAITRTTTTVSFNSEQFTILLLNQHFSSTLS	ATTAAAGTTCATTCGAAAGGTTATTTTTACACTGAGGCTGCTGCTATTACCAGAACTACAACAACTGTCAGTTTCAATTCTGAACAATTTACTATCTTACTGCTCAACCAACACTTTTCTTCCACACTTAGT	4.88167	26.1657
C2_07900W_A-T_1608047_1608217_171	C2_07900W_A	GDH2	Ca22chr2A_C_albicans_SC5314	+	AAG	1608047-1608217	KFIRKVIFTLRLLLLPELQQLSVSILNNLLSYCSTNTFLPHLVDQLLISRVFATVIY	AAGTTCATTCGAAAGGTTATTTTTACACTGAGGCTGCTGCTATTACCAGAACTACAACAACTGTCAGTTTCAATTCTGAACAATTTACTATCTTACTGCTCAACCAACACTTTTCTTCCACACTTAGTTGATCAGTTACTAATATCAAGAGTTTTTGCTACAGTGATATAC	4.3	27.0677
C2_08040C_A-T_1633721_1633990_270	C2_08040C_A	RPS10	Ca22chr2A_C_albicans_SC5314	-	ATC	1633721-1633990	INQLESQHVNSKRRQKEDPPIPLPRYVNMNYKLEQNMAFQGMHDKSRVHEKAQIITVVKKNFTTNNNKKISKRFSNHYLQETYNIMESLI	ATCAATCAACTAGAGTCACAGCATGTTAATTCCAAAAGAAGACAGAAAGAAGATCCACCAATACCTCTTCCAAGGTATGTAAATATGAATTATAAACTGGAACAGAATATGGCATTTCAAGGGATGCACGATAAGTCAAGAGTTCATGAAAAAGCACAGATTATAACAGTCGTAAAGAAAAATTTCACTACCAACAACAATAAGAAGATATCAAAGAGATTCAGTAATCACTACTTACAAGAAACATATAACATCATGGAGAGTTTAATT	633.543	548.672
C2_08040C_A-T_1633828_1633902_75	C2_08040C_A	RPS10	Ca22chr2A_C_albicans_SC5314	-	ATT	1633828-1633902	IINWNRIWHFKGCTISQEFMKKHRL	ATTATAAACTGGAACAGAATATGGCATTTCAAGGGATGCACGATAAGTCAAGAGTTCATGAAAAAGCACAGATTA	0.478333	4.30533
C2_08070C_A-T_1640101_1640172_72	C2_08070C_A	MRS4	Ca22chr2A_C_albicans_SC5314	-	ATA	1640101-1640172	IRISQFLPTQLRKKTLLLIVLYLH	ATAAGAATAAGTCAATTTTTACCAACACAATTGAGAAAAAAAACGCTTTTACTGATTGTTCTTTATCTTCAT	1.29067	1.89733
C2_08070C_A-T_1639836_1639994_159	C2_08070C_A	MRS4	Ca22chr2A_C_albicans_SC5314	-	ACG	1639836-1639994	TREKKSTSIKKKTSPNPTSSLSPRFFFIIFSPLETLLYKQLNIGEPFQPVYII	ACGAGAGAGAAAAAGTCAACTTCCATCAAAAAAAAAACCAGCCCAAATCCCACCAGTTCGTTGTCTCCACGATTTTTTTTTATTATTTTTTCACCACTGGAAACATTACTTTATAAACAACTGAACATTGGAGAACCCTTTCAACCAGTCTATATTATT	1.37	5.477
C2_08070C_A-T_1640096_1640170_75	C2_08070C_A	MRS4	Ca22chr2A_C_albicans_SC5314	-	AAG	1640096-1640170	KNKSIFTNTIEKKNAFTDCSLSSLI	AAGAATAAGTCAATTTTTACCAACACAATTGAGAAAAAAAACGCTTTTACTGATTGTTCTTTATCTTCATTAATT	1.239	1.82133
C2_08070C_A-T_1639874_1640023_150	C2_08070C_A	MRS4	Ca22chr2A_C_albicans_SC5314	-	AAG	1639874-1640023	KCACVSVKQKRERKSQLPSKKKPAQIPPVRCLHDFFLLFFHHWKHYFINN	AAGTGTGCGTGTGTGAGCGTTAAACAAAAACGAGAGAGAAAAAGTCAACTTCCATCAAAAAAAAAACCAGCCCAAATCCCACCAGTTCGTTGTCTCCACGATTTTTTTTTATTATTTTTTCACCACTGGAAACATTACTTTATAAACAAC	1.52267	6.247
C2_08160C_A-T_1655576_1655680_105	C2_08160C_A	C2_08160C_A	Ca22chr2A_C_albicans_SC5314	-	ATC	1655576-1655680	IMSSFQAQAQNYLSQIDKVCLMHRFSHLPFQRLHS	ATCATGTCTAGTTTCCAAGCTCAAGCTCAAAATTATTTATCTCAAATTGATAAAGTATGTTTAATGCACAGATTTTCTCATTTGCCATTTCAACGACTTCATTCT	13.805	13.975
C2_08160C_A-T_1655620_1655700_81	C2_08160C_A	C2_08160C_A	Ca22chr2A_C_albicans_SC5314	-	ATC	1655620-1655700	INCYNLKSCLVSKLKLKIIYLKLIKYV	ATCAATTGTTATAATCTCAAATCATGTCTAGTTTCCAAGCTCAAGCTCAAAATTATTTATCTCAAATTGATAAAGTATGTT	17.895	18.3443
C2_08190W_A-T_1660377_1660535_159	C2_08190W_A	VMA5	Ca22chr2A_C_albicans_SC5314	+	ATT	1660377-1660535	ILKIINDDKIQLSQQISFLRPTNINLLSIHSFIRIHLSNQKNNFSCIDIFTFH	ATTTTAAAAATAATCAACGACGACAAAATCCAACTTTCTCAACAAATCTCCTTCCTCCGCCCAACCAACATAAACCTTCTATCCATTCATTCATTCATTCGTATACATTTATCAAATCAAAAGAACAACTTTTCTTGTATTGACATTTTCACATTCCAT	0.225667	2.82333
C2_08270C_A-T_1672789_1672854_66	C2_08270C_A	C2_08270C_A	Ca22chr2A_C_albicans_SC5314	-	ATT	1672789-1672854	IQSSLLRIGIARQNYRPIPTGY	ATTCAAAGTAGTTTGTTAAGAATAGGAATAGCAAGACAAAATTACAGACCAATCCCCACTGGATAT	0	6.355
C2_08270C_A-T_1672585_1672674_90	C2_08270C_A	C2_08270C_A	Ca22chr2A_C_albicans_SC5314	-	ATA	1672585-1672674	INKKTHLQSNTQSSTHQTPSPTLPHPAVIN	ATAAATAAAAAGACACATCTTCAATCAAACACTCAATCATCCACACACCAAACACCATCGCCCACACTCCCACACCCAGCAGTGATAAAT	2.23567	14.787
C2_08270C_A-T_1672593_1672670_78	C2_08270C_A	C2_08270C_A	Ca22chr2A_C_albicans_SC5314	-	ATA	1672593-1672670	IKRHIFNQTLNHPHTKHHRPHSHTQQ	ATAAAAAGACACATCTTCAATCAAACACTCAATCATCCACACACCAAACACCATCGCCCACACTCCCACACCCAGCAG	2.57933	16.9673
C2_08310W_A-T_1678070_1678159_90	C2_08310W_A	TIM22	Ca22chr2A_C_albicans_SC5314	+	ATA	1678070-1678159	IQLHQQFSKKEGFSIYTKGLEQIIPNTRTH	ATACAACTTCATCAACAGTTCTCCAAAAAAGAAGGCTTTTCCATTTATACCAAGGGTTTAGAGCAGATCATTCCAAACACCCGGACTCAC	0	0.941333
C2_08570W_A-T_1736277_1736366_90	C2_08570W_A	ANP1	Ca22chr2A_C_albicans_SC5314	+	ATT	1736277-1736366	ISFSFTTTLPYLNPYFTLLHFLSTFINNYY	ATTTCATTTTCTTTCACAACCACCCTACCTTACCTAAACCCCTACTTTACCTTATTGCATTTTTTATCCACATTCATCAATAACTACTAC	0	3.10133
C2_08570W_A-T_1736563_1736634_72	C2_08570W_A	ANP1	Ca22chr2A_C_albicans_SC5314	+	ATT	1736563-1736634	ILHILYFFLRTHNINTINTTGHTL	ATTTTGCATATATTATATTTTTTCTTAAGAACACATAATATCAACACAATCAATACCACTGGTCACACCCTA	0.382667	1.89733
C2_08610W_A-T_1751574_1751663_90	C2_08610W_A	ERG9	Ca22chr2A_C_albicans_SC5314	+	ATT	1751574-1751663	IKKKFQQHLLLPSKDFFNSQRHLSQLIVPL	ATTAAAAAAAAATTTCAGCAACACCTTCTACTACCATCAAAAGATTTCTTTAACAGTCAACGACATCTTTCACAATTGATTGTCCCTCTT	2.207	4.61133
C2_08610W_A-T_1751653_1751796_144	C2_08610W_A	ERG9	Ca22chr2A_C_albicans_SC5314	+	TTG	1751653-1751796	LSLFNSFSLLFHHLSTLIALEFINSKRYILFSSQPNIFSPPVVKFIPH	TTGTCCCTCTTTAATTCCTTTTCTTTGCTTTTTCATCACCTCTCCACGCTTATTGCATTAGAATTCATCAATTCAAAAAGATATATATTATTCTCTTCCCAACCCAATATTTTTTCACCACCTGTTGTCAAATTTATTCCACAT	4.74167	6.726
C2_08610W_A-T_1751633_1751710_78	C2_08610W_A	ERG9	Ca22chr2A_C_albicans_SC5314	+	ACG	1751633-1751710	TTSFTIDCPSLIPFLCFFITSPRLLH	ACGACATCTTTCACAATTGATTGTCCCTCTTTAATTCCTTTTCTTTGCTTTTTCATCACCTCTCCACGCTTATTGCAT	2.65333	11.0523
C2_08700C_A-T_1770177_1770347_171	C2_08700C_A	C2_08700C_A	Ca22chr2A_C_albicans_SC5314	-	ATT	1770177-1770347	ILLQLTTIIFYFYHLIVEFTVYILFGFYLFISTLSTIAYPPLLSFPPFLFSSLPSLD	ATTTTATTACAACTTACTACAATCATCTTTTATTTCTATCATTTGATAGTCGAATTTACTGTTTATATCTTGTTTGGGTTTTACCTATTTATTTCAACCCTATCAACCATCGCATACCCCCCCCTTCTCTCCTTCCCTCCCTTCCTTTTCTCCTCCCTTCCCTCCCTTGAC	0.854333	2.22333
C2_08700C_A-T_1770181_1770360_180	C2_08700C_A	C2_08700C_A	Ca22chr2A_C_albicans_SC5314	-	ATT	1770181-1770360	ITFSYFITTYYNHLLFLSFDSRIYCLYLVWVLPIYFNPINHRIPPPSLLPSLPFLLPSLP	ATTACTTTTTCATATTTTATTACAACTTACTACAATCATCTTTTATTTCTATCATTTGATAGTCGAATTTACTGTTTATATCTTGTTTGGGTTTTACCTATTTATTTCAACCCTATCAACCATCGCATACCCCCCCCTTCTCTCCTTCCCTCCCTTCCTTTTCTCCTCCCTTCCCTCCCT	0.811667	2.07067
C2_08980C_A-T_1828307_1828390_84	C2_08980C_A	PGA55	Ca22chr2A_C_albicans_SC5314	-	ATA	1828307-1828390	IGAGRCGIKALKIADTLYHLIMEGSFPF	ATAGGGGCTGGGAGATGTGGAATAAAAGCTCTAAAAATAGCTGACACTTTATATCATTTGATTATGGAAGGATCTTTTCCATTT	0	1.153
C2_09180W_A-T_1884577_1884687_111	C2_09180W_A	C2_09180W_A	Ca22chr2A_C_albicans_SC5314	+	ATA	1884577-1884687	IVIIMINACLLSFLVSVIDCLYKKNKMLRRFSKSIRQ	ATAGTTATTATCATGATCAATGCCTGTTTATTGTCATTTCTTGTTTCTGTGATAGATTGTTTATATAAAAAAAATAAAATGCTTCGTAGATTTTCTAAAAGTATAAGACAA	0.248333	3.1
C2_09180W_A-T_1884464_1884526_63	C2_09180W_A	C2_09180W_A	Ca22chr2A_C_albicans_SC5314	+	ATA	1884464-1884526	IVLVVIPFNKKRKREKNRERS	ATAGTACTAGTGGTGATACCATTCAATAAAAAAAGAAAAAGGGAAAAGAATAGAGAAAGGAGT	28.98	3.77267
C2_09570C_A-T_1958918_1958977_60	C2_09570C_A	C2_09570C_A	Ca22chr2A_C_albicans_SC5314	-	ATA	1958918-1958977	ILDHLFPSKPHLIINTRKSK	ATATTAGACCATCTATTCCCTTCAAAACCACACCTCATTATCAATACCAGGAAATCAAAG	3.67367	3.35233
C2_09570C_A-T_1958558_1958779_222	C2_09570C_A	C2_09570C_A	Ca22chr2A_C_albicans_SC5314	-	ATC	1958558-1958779	IYFNNRFFNIYSSIHIFISLFIYLFICLFVFFCIPIGVSIAHLIYSTISQIITSIHSFYYFAHRKAHVYINIYS	ATCTACTTCAACAACCGATTCTTTAACATATATTCATCTATTCATATATTTATTAGCTTATTTATTTATTTATTCATTTGTTTGTTTGTTTTTTTTTGCATTCCCATTGGAGTTTCTATTGCACATTTAATATATTCAACAATCTCCCAAATCATCACATCTATTCATTCATTTTATTATTTTGCCCACAGAAAAGCACACGTGTATATCAACATATATTCA	2.16933	1.47667
C2_09570C_A-T_1958869_1958967_99	C2_09570C_A	C2_09570C_A	Ca22chr2A_C_albicans_SC5314	-	ATC	1958869-1958967	IYSLQNHTSLSIPGNQSKYLLFFFLLFLFFYLV	ATCTATTCCCTTCAAAACCACACCTCATTATCAATACCAGGAAATCAAAGTAAATATTTGTTATTCTTTTTTTTGCTTTTTCTTTTTTTTTATTTGGTT	0	1.95667
C2_09570C_A-T_1958545_1958646_102	C2_09570C_A	C2_09570C_A	Ca22chr2A_C_albicans_SC5314	-	ATT	1958545-1958646	IQQSPKSSHLFIHFIILPTEKHTCISTYIHDINV	ATTCAACAATCTCCCAAATCATCACATCTATTCATTCATTTTATTATTTTGCCCACAGAAAAGCACACGTGTATATCAACATATATTCATGATATCAATGTT	4.36967	2.99567
C2_09570C_A-T_1958847_1958975_129	C2_09570C_A	C2_09570C_A	Ca22chr2A_C_albicans_SC5314	-	ATT	1958847-1958975	IRPSIPFKTTPHYQYQEIKVNICYSFFCFFFFFIWFNYCLWQF	ATTAGACCATCTATTCCCTTCAAAACCACACCTCATTATCAATACCAGGAAATCAAAGTAAATATTTGTTATTCTTTTTTTTGCTTTTTCTTTTTTTTTATTTGGTTTAATTATTGTTTGTGGCAATTC	1.70867	1.588
C2_09580W_A-T_1960343_1960405_63	C2_09580W_A	AGE2	Ca22chr2A_C_albicans_SC5314	+	ATT	1960343-1960405	IYHQHHCNNNNNHNSSSNYKF	ATTTACCACCAACACCACTGCAACAACAACAACAACCACAATAGCTCCTCCAACTATAAATTT	0.569667	4.16833
C2_09580W_A-T_1960458_1960532_75	C2_09580W_A	AGE2	Ca22chr2A_C_albicans_SC5314	+	ATA	1960458-1960532	IHFNFVYLFERIEFYLIDLHCIYQI	ATACATTTTAATTTTGTCTATCTATTTGAAAGAATTGAGTTTTATTTGATCGATTTACATTGTATATATCAAATT	0.367333	3.479
C2_09610W_A-T_1967186_1967335_150	C2_09610W_A	C2_09610W_A	Ca22chr2A_C_albicans_SC5314	+	ATA	1967186-1967335	IFIHCTSIPITTTATTIYPTSRSNPFHLYLCHFHTFCLIEFTHCKSQTHI	ATATTTATTCATTGTACTAGCATCCCCATCACCACTACTGCCACCACCATTTACCCCACTAGCCGCAGTAACCCATTTCATTTATATCTTTGTCACTTTCACACGTTTTGCTTGATAGAATTTACACATTGTAAGTCACAAACACACATA	2.11433	0.667
C2_09610W_A-T_1967196_1967297_102	C2_09610W_A	C2_09610W_A	Ca22chr2A_C_albicans_SC5314	+	ATT	1967196-1967297	IVLASPSPLLPPPFTPLAAVTHFIYIFVTFTRFA	ATTGTACTAGCATCCCCATCACCACTACTGCCACCACCATTTACCCCACTAGCCGCAGTAACCCATTTCATTTATATCTTTGTCACTTTCACACGTTTTGCT	2.83933	0.581333
C2_09650W_A-T_1974339_1974434_96	C2_09650W_A	C2_09650W_A	Ca22chr2A_C_albicans_SC5314	+	AAG	1974339-1974434	KRTYIHLNTLWYPPQSQLATQSYRLLNKKITW	AAGAGAACATATATACACCTGAATACTTTGTGGTATCCTCCCCAATCCCAATTAGCCACCCAATCGTATCGGTTACTGAATAAGAAAATCACCTGG	3.41733	16.3513
C2_09650W_A-T_1974347_1974418_72	C2_09650W_A	C2_09650W_A	Ca22chr2A_C_albicans_SC5314	+	ATA	1974347-1974418	IYTPEYFVVSSPIPISHPIVSVTE	ATATATACACCTGAATACTTTGTGGTATCCTCCCCAATCCCAATTAGCCACCCAATCGTATCGGTTACTGAA	1.87767	17.9177
C2_09900C_A-T_2026236_2026361_126	C2_09900C_A	TIM23	Ca22chr2A_C_albicans_SC5314	-	ATC	2026236-2026361	IIYNTINVYYLFIFCIIFGITKLNKERLLEIIYQIEKIIFII	ATCATATATAATACTATTAACGTCTATTATTTATTTATTTTTTGTATTATTTTTGGAATAACCAAACTCAATAAAGAGAGACTACTAGAAATTATTTATCAAATCGAAAAGATCATTTTTATCATA	7.186	9.163
C2_09900C_A-T_2026304_2026393_90	C2_09900C_A	TIM23	Ca22chr2A_C_albicans_SC5314	-	ATT	2026304-2026393	INILIIYRERISYIILLTSIIYLFFVLFLE	ATTAATATACTCATCATTTATAGAGAGAGGATATCATATATAATACTATTAACGTCTATTATTTATTTATTTTTTGTATTATTTTTGGAA	2.60567	2.594
C2_09940W_A-T_2030727_2030798_72	C2_09940W_A	GCN4	Ca22chr2A_C_albicans_SC5314	+	ATT	2030727-2030798	IIIIYYLPLFYSLYCPNFFQDYIH	ATTATTATTATTTATTATTTACCCCTTTTTTATTCATTATATTGTCCAAATTTTTTCCAAGATTATATACAT	10.9027	3.60967
C2_09940W_A-T_2030895_2030960_66	C2_09940W_A	GCN4	Ca22chr2A_C_albicans_SC5314	+	TTG	2030895-2030960	LFLLQHLLLTLFTIPPFLNMLK	TTGTTTTTATTACAACACCTTTTACTTACTTTGTTTACTATCCCCCCCTTTTTAAATATGCTAAAA	3.466	1.40367
C2_09940W_A-T_2030740_2030841_102	C2_09940W_A	GCN4	Ca22chr2A_C_albicans_SC5314	+	ATT	2030740-2030841	IIYPFFIHYIVQIFSKIIYIRKNVCLNLFTLVIQ	ATTATTTACCCCTTTTTTATTCATTATATTGTCCAAATTTTTTCCAAGATTATATACATTAGAAAAAATGTGTGCCTAAATTTATTTACCCTTGTAATACAA	193.579	58.9063
C2_09940W_A-T_2030881_2030946_66	C2_09940W_A	GCN4	Ca22chr2A_C_albicans_SC5314	+	TTG	2030881-2030946	LLSNNCFYYNTFYLLCLLSPPF	TTGTTATCAAATAATTGTTTTTATTACAACACCTTTTACTTACTTTGTTTACTATCCCCCCCTTTT	0.961	1.68433
C2_09940W_A-T_2031058_2031138_81	C2_09940W_A	GCN4	Ca22chr2A_C_albicans_SC5314	+	ATA	2031058-2031138	IELLLLLLLLLRKSCLNIIIIIFTVVI	ATAGAATTACTATTATTATTATTACTACTACTTAGAAAGTCCTGCCTCAATATTATTATTATTATATTTACTGTTGTTATT	1.12333	2.47033
C2_09940W_A-T_2030705_2030815_111	C2_09940W_A	GCN4	Ca22chr2A_C_albicans_SC5314	+	ATC	2030705-2030815	ICYKLIINYYYLLFTPFLFIILSKFFPRLYTLEKMCA	ATCTGCTATAAACTTATCATAAATTATTATTATTTATTATTTACCCCTTTTTTATTCATTATATTGTCCAAATTTTTTCCAAGATTATATACATTAGAAAAAATGTGTGCC	170.777	45.2787
C2_09940W_A-T_2030861_2031022_162	C2_09940W_A	GCN4	Ca22chr2A_C_albicans_SC5314	+	ATT	2030861-2031022	IRKKKLFCYQIIVFITTPFTYFVYYPPLFKYAKIELLLITVKMVSPLLLLLLLP	ATTAGAAAAAAAAAGTTGTTTTGTTATCAAATAATTGTTTTTATTACAACACCTTTTACTTACTTTGTTTACTATCCCCCCCTTTTTAAATATGCTAAAATAGAATTGTTATTAATTACCGTTAAAATGGTGTCCCCTTTACTACTGCTTTTGCTACTACCT	4.76233	5.127
C2_09940W_B-T_2030802_2030930_129	C2_09940W_B	C2_09940W_B	Ca22chr2B_C_albicans_SC5314	+	TTG	2030802-2030930	LFLLQHLLLTLFTIPPLFKYAKIELLLITVKMVSPLLLLLLLP	TTGTTTTTATTACAACACCTTTTACTTACTTTGTTTACTATCCCTCCCCTTTTTAAATATGCTAAAATAGAATTGTTATTAATTACCGTTAAAATGGTGTCCCCTTTACTACTGCTTTTGCTACTACCT	1.947	1.383
C2_09940W_B-T_2030788_2030868_81	C2_09940W_B	C2_09940W_B	Ca22chr2B_C_albicans_SC5314	+	TTG	2030788-2030868	LLSNNCFYYNTFYLLCLLSLPFLNMLK	TTGTTATCAAATAATTGTTTTTATTACAACACCTTTTACTTACTTTGTTTACTATCCCTCCCCTTTTTAAATATGCTAAAA	3.10067	2.20233
C2_09940W_B-T_2030768_2030854_87	C2_09940W_B	C2_09940W_B	Ca22chr2B_C_albicans_SC5314	+	ATT	2030768-2030854	IRKKKLFCYQIIVFITTPFTYFVYYPSPF	ATTAGAAAAAAAAAGTTGTTTTGTTATCAAATAATTGTTTTTATTACAACACCTTTTACTTACTTTGTTTACTATCCCTCCCCTTTT	2.88667	1.88
C2_09950W_A-T_2034563_2034685_123	C2_09950W_A	FCY21	Ca22chr2A_C_albicans_SC5314	+	ATT	2034563-2034685	IYNLLSLYLSHFTFIPISYHPLYIYLYQLTVNIILPSPSLQ	ATTTACAACCTTTTATCCCTTTACCTTTCCCATTTTACCTTTATCCCCATATCCTATCATCCCCTATATATTTACTTGTATCAATTAACAGTAAATATAATTCTCCCATCACCATCCTTACAA	1.47933	3.43467
C2_09970C_A-T_2039275_2039496_222	C2_09970C_A	C2_09970C_A	Ca22chr2A_C_albicans_SC5314	-	ATT	2039275-2039496	IVFLLNFKSFFFFFFFLLKRQNNQQPTTTAAETERERQRQQRERKISSSFFFFKKQPTTTTNGTKKKNTTALQI	ATTGTTTTTCTTCTTAACTTTAAATCTTTTTTTTTTTTTTTTTTTTTTTTACTTAAGAGGCAAAATAACCAACAACCAACAACAACAGCAGCAGAGACAGAGAGAGAGAGACAGAGACAGCAGAGAGAGAGAAAAATTTCTTCTTCCTTTTTTTTTTTTAAAAAACAACCAACGACAACAACCAACGGGACAAAAAAAAAAAACACAACAGCACTTCAAATT	0.447333	8.461
C2_09970C_A-T_2039253_2039495_243	C2_09970C_A	C2_09970C_A	Ca22chr2A_C_albicans_SC5314	-	TTG	2039253-2039495	LFFFLTLNLFFFFFFFYLRGKITNNQQQQQQRQRERDRDSREREKFLLPFFFLKNNQRQQPTGQKKKTQQHFKFKPITRLI	TTGTTTTTCTTCTTAACTTTAAATCTTTTTTTTTTTTTTTTTTTTTTTTACTTAAGAGGCAAAATAACCAACAACCAACAACAACAGCAGCAGAGACAGAGAGAGAGAGACAGAGACAGCAGAGAGAGAGAAAAATTTCTTCTTCCTTTTTTTTTTTTAAAAAACAACCAACGACAACAACCAACGGGACAAAAAAAAAAAACACAACAGCACTTCAAATTTAAACCAATTACAAGGTTAATC	0.556333	7.89733
C2_10170C_A-T_2091372_2091464_93	C2_10170C_A	C2_10170C_A	Ca22chr2A_C_albicans_SC5314	-	ATT	2091372-2091464	IPSLNKSITYLHFFLLYLINTINIYTLTFTQ	ATTCCCTCCCTCAATAAAAGTATAACTTACCTTCACTTTTTTTTGTTATATCTCATAAATACGATCAACATATATACTTTAACTTTCACCCAA	9.518	61.136
C2_10170C_A-T_2091524_2091586_63	C2_10170C_A	C2_10170C_A	Ca22chr2A_C_albicans_SC5314	-	ATT	2091524-2091586	IIIILITFNQSINQIHSQFSF	ATTATTATTATTCTCATAACCTTCAATCAATCAATCAATCAAATACATTCCCAATTTAGCTTT	13.3863	14.5103
C2_10170C_A-T_2091493_2091561_69	C2_10170C_A	C2_10170C_A	Ca22chr2A_C_albicans_SC5314	-	ATC	2091493-2091561	INQSIKYIPNLAFETLLITVERV	ATCAATCAATCAATCAAATACATTCCCAATTTAGCTTTTGAAACACTACTAATTACAGTTGAACGTGTT	21.8293	14.215
C2_10170C_A-T_2091328_2091447_120	C2_10170C_A	C2_10170C_A	Ca22chr2A_C_albicans_SC5314	-	AAG	2091328-2091447	KYNLPSLFFVISHKYDQHIYFNFHPIVKRCKSILCNIIND	AAGTATAACTTACCTTCACTTTTTTTTGTTATATCTCATAAATACGATCAACATATATACTTTAACTTTCACCCAATAGTTAAAAGGTGCAAATCTATACTGTGTAATATTATTAACGAT	8.29467	51.476
C2_10170C_B-T_2091293_2091385_93	C2_10170C_B	C2_10170C_B	Ca22chr2B_C_albicans_SC5314	-	ATT	2091293-2091385	IPSLNKSITYLHFFLLYLINTINIYTLTFTQ	ATTCCCTCCCTCAATAAAAGTATAACTTACCTTCACTTTTTTTTGTTATATCTCATAAATACGATCAACATATATACTTTAACTTTCACCCAA	2.84567	0.04
C2_10170C_B-T_2091249_2091368_120	C2_10170C_B	C2_10170C_B	Ca22chr2B_C_albicans_SC5314	-	AAG	2091249-2091368	KYNLPSLFFVISHKYDQHIYFNFHPIAKRCKSILCNIIND	AAGTATAACTTACCTTCACTTTTTTTTGTTATATCTCATAAATACGATCAACATATATACTTTAACTTTCACCCAATAGCTAAAAGGTGCAAATCTATACTGTGTAATATTATTAACGAT	2.20533	0.031
C2_10240W_A-T_2107329_2107475_147	C2_10240W_A	GPD1	Ca22chr2A_C_albicans_SC5314	+	ATT	2107329-2107475	IQLNISPPPKQVFFYYYYIVCVWLHYLSIKTINSTKNFTVSFFFTQKIL	ATTCAATTAAATATCTCCCCACCCCCTAAACAAGTGTTTTTTTATTATTATTATATTGTCTGTGTGTGGTTACATTATTTAAGCATAAAGACAATAAACTCAACAAAAAATTTTACAGTTTCTTTTTTTTTCACCCAAAAAATTTTA	9.079	9.937
C2_10240W_A-T_2107512_2107595_84	C2_10240W_A	GPD1	Ca22chr2A_C_albicans_SC5314	+	ATT	2107512-2107595	IILLLILIPFQELTYYYLLLVTKSSLKI	ATTATACTACTCCTCATCCTCATCCCATTTCAAGAACTAACTTATTATTATTTATTACTAGTAACAAAGTCTAGTTTGAAAATT	1.312	4.78467
C2_10240W_A-T_2107339_2107407_69	C2_10240W_A	GPD1	Ca22chr2A_C_albicans_SC5314	+	ATA	2107339-2107407	ISPHPLNKCFFIIIILSVCGYII	ATATCTCCCCACCCCCTAAACAAGTGTTTTTTTATTATTATTATATTGTCTGTGTGTGGTTACATTATT	13.6223	19.4123
C2_10240W_A-T_2107172_2107354_183	C2_10240W_A	GPD1	Ca22chr2A_C_albicans_SC5314	+	ATT	2107172-2107354	IKELLIFQSSNSQLISSDLQLTLPYLSYNNYYHYRDRTLRIQLIQQVQIQFINSIKYLPTP	ATTAAAGAATTACTTATCTTTCAATCTTCTAATAGTCAACTCATCTCATCTGATCTTCAATTGACTTTACCATATCTATCCTACAACAATTATTATCATTATAGAGATAGAACATTAAGAATTCAACTTATACAACAAGTTCAAATTCAATTTATAAATTCAATTAAATATCTCCCCACCCCC	2.962	27.0163
C2_10240W_A-T_2107388_2107582_195	C2_10240W_A	GPD1	Ca22chr2A_C_albicans_SC5314	+	CTG	2107388-2107582	LCVVTLFKHKDNKLNKKFYSFFFFHPKNFIIRNFIEGSTLEHYTTPHPHPISRTNLLLFITSNKV	CTGTGTGTGGTTACATTATTTAAGCATAAAGACAATAAACTCAACAAAAAATTTTACAGTTTCTTTTTTTTTCACCCAAAAAATTTTATAATAAGGAACTTTATTGAAGGAAGTACTTTAGAACATTATACTACTCCTCATCCTCATCCCATTTCAAGAACTAACTTATTATTATTTATTACTAGTAACAAAGTC	2.30667	2.10167
C2_10590W_A-T_2186158_2186277_120	C2_10590W_A	GAL4	Ca22chr2A_C_albicans_SC5314	+	ATT	2186158-2186277	IPFFLFCRKPLKLLNLFWTESPVIDTIHNVEEELIYLLND	ATTCCCTTTTTCCTCTTTTGTAGAAAACCACTAAAGTTGCTTAACTTATTTTGGACCGAATCACCCGTGATCGACACCATTCACAACGTTGAAGAAGAACTTATCTATTTGCTAAACGAT	5.74333	45.4913
C2_10590W_A-T_2186303_2186497_195	C2_10590W_A	GAL4	Ca22chr2A_C_albicans_SC5314	+	ATT	2186303-2186497	IIIFLDTCSILLVCGFSQQVNNLPLITTTPPQHKKKRKTNYSRIIAIIFFSCFIYLFIKLILVTL	ATTATTATATTTCTTGACACTTGCTCAATTCTGTTGGTGTGTGGGTTTTCCCAACAAGTTAACAATTTACCCCTAATCACTACCACCCCCCCTCAACACAAAAAAAAAAGAAAAACGAACTATTCCAGAATAATTGCTATAATTTTTTTCAGTTGTTTTATTTATTTATTTATTAAATTAATTCTCGTCACCTTA	2.246	4.767
C2_10680W_A-T_2197077_2197172_96	C2_10680W_A	C2_10680W_A	Ca22chr2A_C_albicans_SC5314	+	TTG	2197077-2197172	LLGIYGLWVVVVVCRRNKQKSVVECLLDQKKK	TTGCTAGGAATCTATGGACTGTGGGTTGTTGTTGTTGTTTGTAGAAGAAATAAACAAAAGAGTGTAGTTGAGTGTCTACTTGACCAAAAAAAAAAG	10.5563	17.037
C3_00360W_A-T_51540_51602_63	C3_00360W_A	C3_00360W_A	Ca22chr3A_C_albicans_SC5314	+	ACG	51540-51602	TLVALFIFVYLHPNHITNQPI	ACGTTGGTAGCACTATTCATATTTGTATATCTTCACCCCAACCATATCACGAATCAGCCAATT	0	5.10133
C3_00360W_A-T_51562_51624_63	C3_00360W_A	C3_00360W_A	Ca22chr3A_C_albicans_SC5314	+	TTG	51562-51624	LYIFTPTISRISQFEKTRAGT	TTGTATATCTTCACCCCAACCATATCACGAATCAGCCAATTTGAAAAAACCAGGGCTGGAACT	41.1107	5.61467
C3_00360W_A-T_51527_51661_135	C3_00360W_A	C3_00360W_A	Ca22chr3A_C_albicans_SC5314	+	TTG	51527-51661	LTKVDVGSTIHICISSPQPYHESANLKKPGLELEFTSFTTRLIFL	TTGACGAAAGTAGACGTTGGTAGCACTATTCATATTTGTATATCTTCACCCCAACCATATCACGAATCAGCCAATTTGAAAAAACCAGGGCTGGAACTTGAGTTCACAAGTTTTACCACTAGACTAATCTTTTTG	22.883	5.385
C3_00470W_A-T_66121_66237_117	C3_00470W_A	C3_00470W_A	Ca22chr3A_C_albicans_SC5314	+	ATT	66121-66237	IPLFILYLNIHIILFMNSDKRKLKPTFILYYSLYTNYKR	ATTCCCCTTTTTATTCTTTATTTAAATATTCATATTATATTATTCATGAATAGTGATAAACGAAAATTAAAACCAACCTTTATCCTTTACTATTCTTTATACACAAATTATAAACGA	4.83033	13.7547
C3_00470W_A-T_66212_66271_60	C3_00470W_A	C3_00470W_A	Ca22chr3A_C_albicans_SC5314	+	ATT	66212-66271	ILYTQIINDKKDVSTENIHL	ATTCTTTATACACAAATTATAAACGATAAGAAAGATGTTTCAACAGAGAACATTCATTTG	4.09	14.1603
C3_00470W_A-T_66234_66293_60	C3_00470W_A	C3_00470W_A	Ca22chr3A_C_albicans_SC5314	+	ACG	66234-66293	TIRKMFQQRTFICRNDVELV	ACGATAAGAAAGATGTTTCAACAGAGAACATTCATTTGTAGAAATGATGTAGAACTTGTT	3.033	9.44933
C3_00550C_A-T_80448_80543_96	C3_00550C_A	HRK1	Ca22chr3A_C_albicans_SC5314	-	ATT	80448-80543	IFFLSHESYFISLTNHIATIPTLTPPFTKHYS	ATTTTTTTTTTATCTCACGAGAGTTACTTTATTTCCTTAACCAATCATATAGCAACCATTCCCACCCTAACACCACCATTTACCAAGCATTATTCA	0	2.162
C3_00550C_A-T_80324_80407_84	C3_00550C_A	HRK1	Ca22chr3A_C_albicans_SC5314	-	ATA	80324-80407	IFVNLFHSNFFFPPSSFQLFQDLLVNII	ATATTTGTGAATTTGTTTCATTCTAACTTTTTTTTCCCCCCCTCTTCCTTCCAGCTTTTTCAAGATTTGCTTGTAAATATCATT	4.56133	3.39067
C3_00550C_A-T_80401_80550_150	C3_00550C_A	HRK1	Ca22chr3A_C_albicans_SC5314	-	CTG	80401-80550	LFNFFFISRELLYFLNQSYSNHSHPNTTIYQALFIIQILWLIDFTGLPYL	CTGTTCAATTTTTTTTTTATCTCACGAGAGTTACTTTATTTCCTTAACCAATCATATAGCAACCATTCCCACCCTAACACCACCATTTACCAAGCATTATTCATAATCCAAATTTTATGGCTAATTGACTTTACGGGCCTCCCATATTTG	0.183667	2.22
C3_00550C_A-T_80335_80397_63	C3_00550C_A	HRK1	Ca22chr3A_C_albicans_SC5314	-	ATT	80335-80397	ICFILTFFSPPLPSSFFKICL	ATTTGTTTCATTCTAACTTTTTTTTCCCCCCCTCTTCCTTCCAGCTTTTTCAAGATTTGCTTG	6.082	3.11733
C3_00570C_A-T_85454_85606_153	C3_00570C_A	C3_00570C_A	Ca22chr3A_C_albicans_SC5314	-	ATA	85454-85606	INFENNLNFTISSFSTLLSVLSFFFWGEEYFFFSLCSLNPNFKISTYILFP	ATAAATTTCGAGAATAATCTTAATTTCACAATTTCAAGCTTTTCAACTTTGCTTTCCGTTCTTTCTTTTTTTTTTTGGGGGGAGGAATACTTTTTTTTTTCTCTCTGTTCCTTAAACCCAAATTTCAAAATATCTACATACATCCTTTTTCCA	3.38433	2.60167
C3_00570C_A-T_85495_85602_108	C3_00570C_A	C3_00570C_A	Ca22chr3A_C_albicans_SC5314	-	ATT	85495-85602	ISRIILISQFQAFQLCFPFFLFFFGGRNTFFFLSVP	ATTTCGAGAATAATCTTAATTTCACAATTTCAAGCTTTTCAACTTTGCTTTCCGTTCTTTCTTTTTTTTTTTGGGGGGAGGAATACTTTTTTTTTTCTCTCTGTTCCT	1.02033	1.75467
C3_00570C_A-T_85417_85485_69	C3_00570C_A	C3_00570C_A	Ca22chr3A_C_albicans_SC5314	-	ATT	85417-85485	ISKYLHTSFFHSLILLESYSVLV	ATTTCAAAATATCTACATACATCCTTTTTCCATAGTTTGATATTACTAGAGTCATATTCAGTATTAGTA	5.907	2.102
C3_00570C_A-T_85153_85413_261	C3_00570C_A	C3_00570C_A	Ca22chr3A_C_albicans_SC5314	-	AAG	85153-85413	KGPLNGKSLLYNFCYINIIKKFLSISAGSRSSTTSNTIKTRTSNRNLAVSLYFNRNFFFDSTKKEEEGKTEEQKSKRKKKQTNFKLI	AAGGGACCGTTGAATGGGAAATCATTACTATACAATTTTTGTTACATTAATATAATAAAAAAGTTCTTATCTATTTCAGCTGGCTCTAGGTCCTCCACCACGTCAAATACAATAAAAACGAGAACATCAAACCGAAATTTAGCCGTAAGCTTGTATTTTAATAGGAATTTTTTTTTTGACTCAACCAAGAAGGAAGAAGAGGGAAAAACTGAAGAACAGAAGTCAAAGAGAAAAAAAAAACAAACAAACTTCAAACTTATT	3.953	4.15833
C3_00570C_A-T_85449_85571_123	C3_00570C_A	C3_00570C_A	Ca22chr3A_C_albicans_SC5314	-	AAG	85449-85571	KLFNFAFRSFFFFLGGGILFFFSLFLKPKFQNIYIHPFSIV	AAGCTTTTCAACTTTGCTTTCCGTTCTTTCTTTTTTTTTTTGGGGGGAGGAATACTTTTTTTTTTCTCTCTGTTCCTTAAACCCAAATTTCAAAATATCTACATACATCCTTTTTCCATAGTT	4.20967	2.509
C3_00580W_A-T_88689_88808_120	C3_00580W_A	FLO9	Ca22chr3A_C_albicans_SC5314	+	ATG	88689-88808	MKNNLQPLRAVMKNHQKFHKQYVLFTFQTIGYWQMYIIYI	ATGAAAAATAATTTGCAACCTTTACGAGCTGTAATGAAAAACCACCAGAAATTTCATAAACAATATGTTTTATTCACCTTCCAGACCATAGGTTACTGGCAGATGTATATTATATACATT	0	22.9303
C3_00720W_B-T_132915_133016_102	C3_00720W_B	C3_00720W_B	Ca22chr3B_C_albicans_SC5314	+	ATT	132915-133016	ILFNFRGNKKGERKKKDSPQLNLSFVNIYLYHTI	ATTCTTTTCAACTTTAGAGGAAATAAAAAAGGAGAAAGAAAAAAAAAAGACTCACCCCAACTGAATCTATCATTTGTTAATATTTATTTATACCACACCATA	37.2567	21.2843
C3_00880W_A-T_175236_175304_69	C3_00880W_A	KGD1	Ca22chr3A_C_albicans_SC5314	+	ATT	175236-175304	IVIWLSDKLLASHPPRDFKLQIL	ATTGTGATCTGGTTATCTGATAAGTTACTAGCCAGTCATCCACCGAGAGACTTTAAACTACAAATTTTA	7.271	58.5313
C3_00980W_A-T_198357_198422_66	C3_00980W_A	FLC1	Ca22chr3A_C_albicans_SC5314	+	ATC	198357-198422	ITYSPLQKVTHISIFLVFSYFF	ATCACTTATTCTCCCCTCCAAAAGGTCACACATATATCTATTTTTCTTGTTTTCAGCTATTTTTTT	11.8333	1.01067
C3_00980W_A-T_198456_198533_78	C3_00980W_A	FLC1	Ca22chr3A_C_albicans_SC5314	+	ATC	198456-198533	INFFLFFFFFYTAPPPPSTTINIDNR	ATCAATTTTTTCCTTTTTTTTTTCTTTTTTTACACAGCACCACCACCACCATCAACTACTATCAACATTGACAATCGA	35.9117	5.60833
C3_00980W_A-T_198543_198605_63	C3_00980W_A	FLC1	Ca22chr3A_C_albicans_SC5314	+	ATC	198543-198605	IDIDIYSHTHRDTLLLYSIIY	ATCGACATAGACATATACTCACATACACATAGAGACACATTATTGCTTTATTCAATCATTTAT	1.57633	5.12833
C3_00980W_A-T_198319_198549_231	C3_00980W_A	FLC1	Ca22chr3A_C_albicans_SC5314	+	ATA	198319-198549	ITDYQSYSSINNISLILPSKRSHIYLFFLFSAIFFEYRNTGKRRDRSIFSFFFSFFTQHHHHHQLLSTLTIDNRQST	ATAACTGATTATCAGTCCTATAGTTCTATAAACAATATATCACTTATTCTCCCCTCCAAAAGGTCACACATATATCTATTTTTCTTGTTTTCAGCTATTTTTTTTGAATATCGAAACACGGGAAAGAGAAGGGATAGATCAATTTTTTCCTTTTTTTTTTCTTTTTTTACACAGCACCACCACCACCATCAACTACTATCAACATTGACAATCGATAATCGACAATCGACA	18.7987	3.081
C3_00980W_A-T_198353_198523_171	C3_00980W_A	FLC1	Ca22chr3A_C_albicans_SC5314	+	ATA	198353-198523	IYHLFSPPKGHTYIYFSCFQLFFLNIETREREGIDQFFPFFFLFLHSTTTTINYYQH	ATATATCACTTATTCTCCCCTCCAAAAGGTCACACATATATCTATTTTTCTTGTTTTCAGCTATTTTTTTTGAATATCGAAACACGGGAAAGAGAAGGGATAGATCAATTTTTTCCTTTTTTTTTTCTTTTTTTACACAGCACCACCACCACCATCAACTACTATCAACAT	20.948	3.38167
C3_01080W_B-T_220192_220263_72	C3_01080W_B	C3_01080W_B	Ca22chr3B_C_albicans_SC5314	+	AGG	220192-220263	RKRRFSIKVKQHLNNTNPPYHIYI	AGGAAGAGAAGATTTTCAATCAAAGTAAAGCAACACCTTAACAATACTAACCCTCCATATCACATATACATC	1.37933	68.723
C3_01090W_A-T_221612_221710_99	C3_01090W_A	C3_01090W_A	Ca22chr3A_C_albicans_SC5314	+	TTG	221612-221710	LPKIKILTIHLKYHYKLIAFFFLIFPYSIFPFA	TTGCCGAAAATTAAAATATTAACTATTCATTTAAAATACCACTACAAACTTATAGCATTTTTTTTTCTAATTTTTCCATATTCCATATTCCCATTTGCA	5.98067	0.898333
C3_01090W_B-T_221600_221686_87	C3_01090W_B	C3_01090W_B	Ca22chr3B_C_albicans_SC5314	+	ATT	221600-221686	ISPLSIFLPKIKILTIHLKYHYKLIAFFF	ATTAGTCCACTCTCCATTTTTTTGCCGAAAATTAAAATATTAACTATTCATTTAAAATACCACTACAAACTTATAGCATTTTTTTTC	0	1.01667
C3_01160W_A-T_236083_236172_90	C3_01160W_A	MSS4	Ca22chr3A_C_albicans_SC5314	+	ATT	236083-236172	ITTKKKSNLQFIIFSSSSSSIVFPSIVFPC	ATTACTACCAAAAAGAAATCCAATTTACAATTTATAATATTTTCTTCTTCTTCTTCTTCCATTGTTTTTCCTTCTATTGTTTTTCCTTGT	0	1.529
C3_01160W_A-T_235956_236078_123	C3_01160W_A	MSS4	Ca22chr3A_C_albicans_SC5314	+	ATA	235956-236078	IPFIIFFIGWINNNSNNNNFYFYFYFYFPQLTHLTISIIFS	ATACCTTTCATTATTTTTTTCATTGGATGGATCAACAACAACAGCAACAACAACAACTTTTACTTTTACTTTTACTTTTACTTCCCACAACTTACCCACTTAACTATCAGCATCATCTTTAGT	0	1.179
C3_01160W_A-T_236196_236285_90	C3_01160W_A	MSS4	Ca22chr3A_C_albicans_SC5314	+	ATA	236196-236285	IEVEVERNYRVINQNQNQRRKNETNKHREI	ATAGAAGTAGAAGTAGAAAGAAATTATAGGGTTATAAACCAAAACCAAAACCAAAGAAGAAAAAACGAGACAAACAAACATAGAGAAATT	5.52867	3.88167
C3_01160W_A-T_236313_236414_102	C3_01160W_A	MSS4	Ca22chr3A_C_albicans_SC5314	+	ATT	236313-236414	IYVTNTNIVNFTNHLISNLKILILLLLHIHIHSY	ATTTATGTTACAAATACAAATATCGTCAATTTCACAAACCATCTAATTTCAAATCTAAAGATTCTAATTCTTCTTCTCCTCCACATCCACATCCACAGTTAT	1.244	2.47033
C3_01600W_A-T_351657_351731_75	C3_01600W_A	PPH21	Ca22chr3A_C_albicans_SC5314	+	ATC	351657-351731	IWSIDSYIHINIHIYIYTNTCIYKQ	ATCTGGTCTATTGATTCATATATACATATTAACATACACATTTACATTTACACAAATACTTGCATTTATAAACAA	4.19433	3.353
C3_01610W_A-T_353430_353489_60	C3_01610W_A	C3_01610W_A	Ca22chr3A_C_albicans_SC5314	+	ACG	353430-353489	TFKNNFRLNLFHILNLHIYC	ACGTTCAAGAACAACTTTCGATTGAATCTATTCCACATATTAAACCTACACATCTACTGT	10.615	27.105
C3_01620W_A-T_354686_354748_63	C3_01620W_A	C3_01620W_A	Ca22chr3A_C_albicans_SC5314	+	AAG	354686-354748	KCKEFIFKKNIFSKLIVKKRE	AAGTGTAAAGAGTTTATTTTTAAAAAGAATATATTCAGTAAACTAATAGTTAAAAAAAGGGAA	1.007	33.3937
C3_01700W_A-T_367051_367188_138	C3_01700W_A	CDC53	Ca22chr3A_C_albicans_SC5314	+	ATT	367051-367188	IDIINNNYNSISIQDYILKEVEETFFFAFSLLASYLFLFLSCFCFV	ATTGATATTATCAATAATAATTACAATAGTATATCCATTCAAGATTATATTTTGAAAGAAGTAGAAGAAACTTTTTTTTTTGCCTTCTCCCTTTTAGCAAGTTATCTTTTTTTATTTTTGTCTTGTTTTTGTTTTGTT	8.454	1.10467
C3_02270W_A-T_492346_492459_114	C3_02270W_A	C3_02270W_A	Ca22chr3A_C_albicans_SC5314	+	ATC	492346-492459	ILSTILKKIESTPTLQDFNRLNTYNTYPPPSSPLLYSI	ATCCTATCTACAATCCTCAAAAAGATAGAGTCAACCCCAACCTTACAGGATTTTAACAGATTAAATACATATAATACGTATCCTCCTCCCTCCTCCCCCCTCTTATATTCCATA	7.30967	6.75667
C3_02270W_A-T_492308_492370_63	C3_02270W_A	C3_02270W_A	Ca22chr3A_C_albicans_SC5314	+	CTG	492308-492370	LISCSILILIRDESYLQSSKR	CTGATTAGCTGTTCAATTTTGATACTTATTAGAGACGAATCCTATCTACAATCCTCAAAAAGA	7.562	11.5877
C3_02450W_A-T_536234_536299_66	C3_02450W_A	HRT1	Ca22chr3A_C_albicans_SC5314	+	ATT	536234-536299	IILYFNYKTNRSNPYNHSGDKY	ATTATACTATACTTTAATTATAAAACGAATAGAAGTAATCCATATAACCACAGTGGTGATAAATAT	0.543667	9.01933
C3_02450W_A-T_536315_536410_96	C3_02450W_A	HRT1	Ca22chr3A_C_albicans_SC5314	+	ATA	536315-536410	IDYFSYFFLPIHYFIFILIIHSTYAYTLYTYT	ATAGATTATTTTTCCTACTTCTTCCTCCCAATTCATTACTTCATCTTCATTTTAATTATACACTCAACCTACGCGTACACACTTTACACATATACA	2.84	1.66533
C3_02450W_A-T_536250_536315_66	C3_02450W_A	HRT1	Ca22chr3A_C_albicans_SC5314	+	ATT	536250-536315	IIKRIEVIHITTVVINIDKNFK	ATTATAAAACGAATAGAAGTAATCCATATAACCACAGTGGTGATAAATATTGACAAGAATTTCAAA	0.543667	9.3
C3_03710W_A-T_782522_782608_87	C3_03710W_A	CCC1	Ca22chr3A_C_albicans_SC5314	+	TTG	782522-782608	LSLCLYLIIIYNTHHFLIFIIQAKPTCSI	TTGTCATTGTGTTTGTATTTAATCATCATATACAATACACATCATTTTTTGATTTTCATAATTCAAGCAAAACCAACTTGCTCCATA	20.7313	29.5797
C3_03710W_A-T_782454_782540_87	C3_03710W_A	CCC1	Ca22chr3A_C_albicans_SC5314	+	ATT	782454-782540	ILICIFPILVLFFSLFKNNSLIYCHCVCI	ATTTTGATTTGCATATTTCCCATTCTTGTCTTGTTTTTTTCACTTTTTAAAAACAATTCTTTAATTTATTGTCATTGTGTTTGTATT	12.4013	3.58567
C3_04080W_A-T_854727_854795_69	C3_04080W_A	C3_04080W_A	Ca22chr3A_C_albicans_SC5314	+	ATA	854727-854795	IINLLPSKKHFPIGTIDRQETYN	ATAATCAACCTGCTTCCAAGTAAGAAACATTTTCCAATTGGTACAATTGATAGACAGGAAACTTATAAC	53.4927	93.6237
C3_04080W_A-T_854805_854885_81	C3_04080W_A	C3_04080W_A	Ca22chr3A_C_albicans_SC5314	+	GTG	854805-854885	VNIQKKKKREKEKLYLIQLSIIYFNLI	GTGAATATTCAAAAGAAAAAAAAAAGGGAAAAAGAAAAACTTTACTTAATCCAGCTTAGTATCATATATTTTAATCTTATT	31.3317	60.815
C3_04080W_A-T_854795_854860_66	C3_04080W_A	C3_04080W_A	Ca22chr3A_C_albicans_SC5314	+	CTG	854795-854860	LISCEYSKEKKKGKRKTLLNPA	CTGATCTCTTGTGAATATTCAAAAGAAAAAAAAAAGGGAAAAAGAAAAACTTTACTTAATCCAGCT	43.6173	64.3903
C3_04090W_A-T_856752_856820_69	C3_04090W_A	SBP1	Ca22chr3A_C_albicans_SC5314	+	ATA	856752-856820	IKKKNSIVHIISLDFFEKQKNEI	ATAAAAAAAAAAAACTCCATTGTACATATAATTAGTCTTGATTTCTTTGAAAAACAAAAAAACGAAATC	1.59733	12.406
C3_04180W_A-T_870489_870548_60	C3_04180W_A	KRE9	Ca22chr3A_C_albicans_SC5314	+	ATC	870489-870548	INDLAHPPTKITQLQSIRHI	ATCAACGACCTAGCACATCCACCCACCAAGATAACACAACTACAATCTATCAGACACATC	10.526	8.638
C3_04250W_A-T_882555_882614_60	C3_04250W_A	WSC1	Ca22chr3A_C_albicans_SC5314	+	ATT	882555-882614	IFWIILYTQAFFFSLPSCLN	ATTTTTTGGATTATTCTTTATACCCAAGCTTTCTTCTTTTCTTTGCCTTCGTGCTTGAAC	6.312	4.969
C3_04250W_A-T_882624_882830_207	C3_04250W_A	WSC1	Ca22chr3A_C_albicans_SC5314	+	ATT	882624-882830	ITFVFSYWSKILQILFNSTQLNSTQLNSFYIRSNQISTNIVSSPWFLLLLGILFYSIFFDFGFKVCHSL	ATTACATTCGTTTTTTCCTATTGGTCAAAAATACTACAAATATTATTCAACTCAACTCAACTCAACTCAACTCAACTCAACTCATTTTACATTCGTTCCAACCAAATTTCAACAAATATAGTCTCCTCCCCTTGGTTCCTATTGTTATTGGGCATTCTATTCTATTCTATTTTTTTTGATTTTGGTTTCAAAGTTTGTCATTCACTA	0.173333	3.281
C3_04250W_A-T_882867_882929_63	C3_04250W_A	WSC1	Ca22chr3A_C_albicans_SC5314	+	ATT	882867-882929	IYQHIPPDPCSIVSTNTYYIY	ATTTACCAACATATACCTCCCGACCCCTGTTCCATCGTTTCAACTAACACTTACTACATATAT	0.569667	39.1653
C3_04250W_A-T_882541_882609_69	C3_04250W_A	WSC1	Ca22chr3A_C_albicans_SC5314	+	ATT	882541-882609	IFLILFFGLFFIPKLSSFLCLRA	ATTTTTTTAATTTTATTTTTTGGATTATTCTTTATACCCAAGCTTTCTTCTTTTCTTTGCCTTCGTGCT	4.69	0.966667
C3_04250W_A-T_882859_882972_114	C3_04250W_A	WSC1	Ca22chr3A_C_albicans_SC5314	+	ATC	882859-882972	IILFTNIYLPTPVPSFQLTLTTYIKGILLPSPSLASIQ	ATCATTTTATTTACCAACATATACCTCCCGACCCCTGTTCCATCGTTTCAACTAACACTTACTACATATATTAAAGGCATATTACTTCCATCCCCTTCCCTCGCTTCTATCCAA	3.575	33.13
C3_04250W_A-T_882560_882799_240	C3_04250W_A	WSC1	Ca22chr3A_C_albicans_SC5314	+	TTG	882560-882799	LDYSLYPSFLLFFAFVLELTCNYIRFFLLVKNTTNIIQLNSTQLNSTQLILHSFQPNFNKYSLLPLVPIVIGHSILFYFF	TTGGATTATTCTTTATACCCAAGCTTTCTTCTTTTCTTTGCCTTCGTGCTTGAACTGACGTGTAATTACATTCGTTTTTTCCTATTGGTCAAAAATACTACAAATATTATTCAACTCAACTCAACTCAACTCAACTCAACTCAACTCATTTTACATTCGTTCCAACCAAATTTCAACAAATATAGTCTCCTCCCCTTGGTTCCTATTGTTATTGGGCATTCTATTCTATTCTATTTTTTT	1.842	4.14933
C3_04250W_A-T_882818_882910_93	C3_04250W_A	WSC1	Ca22chr3A_C_albicans_SC5314	+	TTG	882818-882910	LSFTINYLKTGLTRSFYLPTYTSRPLFHRFN	TTGTCATTCACTATAAATTACTTGAAAACAGGGTTAACTAGATCATTTTATTTACCAACATATACCTCCCGACCCCTGTTCCATCGTTTCAAC	0.771667	28.9803
C3_04860W_A-T_1040402_1040500_99	C3_04860W_A	SFP1	Ca22chr3A_C_albicans_SC5314	+	AGG	1040402-1040500	RRKQLKHQSRIPTTQRFGNLFSKLEKAILKEAQ	AGGAGGAAACAACTGAAGCACCAAAGTCGAATTCCTACCACACAGAGGTTTGGCAATTTATTTTCCAAATTAGAGAAAGCGATCCTTAAAGAAGCGCAA	0.362333	3.26167
C3_04860W_A-T_1040570_1040641_72	C3_04860W_A	SFP1	Ca22chr3A_C_albicans_SC5314	+	TTG	1040570-1040641	LISNYILSLALARYKEVPIVFLYF	TTGATATCCAACTACATTTTATCATTGGCATTAGCTAGATATAAAGAGGTTCCTATTGTCTTTCTTTATTTC	0.881	1.544
C3_04860W_A-T_1040741_1040803_63	C3_04860W_A	SFP1	Ca22chr3A_C_albicans_SC5314	+	GTG	1040741-1040803	VTSNISVYLWRRISYTPISKS	GTGACTAGCAATATTTCAGTGTATTTGTGGCGAAGAATAAGTTACACACCAATATCCAAATCT	1.57633	1.23533
C3_04860W_A-T_1040661_1040741_81	C3_04860W_A	SFP1	Ca22chr3A_C_albicans_SC5314	+	ATT	1040661-1040741	INCPNFFCGASRLGTLNQSTLQPHKIK	ATTAACTGTCCTAACTTCTTTTGTGGCGCATCAAGACTTGGTACTTTGAACCAATCGACATTACAACCACATAAGATCAAG	1.329	4.09233
C3_04860W_A-T_1040359_1040487_129	C3_04860W_A	SFP1	Ca22chr3A_C_albicans_SC5314	+	AGG	1040359-1040487	RIFISNSFPCFIKLKEETTEAPKSNSYHTEVWQFIFQIRESDP	AGGATTTTTATTTCCAACTCTTTCCCCTGTTTCATCAAGCTAAAGGAGGAAACAACTGAAGCACCAAAGTCGAATTCCTACCACACAGAGGTTTGGCAATTTATTTTCCAAATTAGAGAAAGCGATCCT	0.491667	3.07767
C3_04860W_A-T_1040923_1041093_171	C3_04860W_A	SFP1	Ca22chr3A_C_albicans_SC5314	+	TTG	1040923-1041093	LCEKLKEITKRAKEKENKLHQIKKRYLVITNLDLRSIETFIYHTKGYSLISVVSARD	TTGTGTGAGAAATTGAAAGAGATTACCAAAAGGGCAAAAGAAAAAGAAAATAAACTACACCAGATAAAAAAAAGATATTTGGTTATTACTAATCTCGATTTACGTTCTATCGAAACCTTTATATATCACACCAAGGGATATTCACTAATAAGTGTAGTTAGTGCAAGAGAT	0.966667	2.378
C3_04950W_A-T_1065772_1065891_120	C3_04950W_A	ARF2	Ca22chr3A_C_albicans_SC5314	+	AAG	1065772-1065891	KQPNFLINLSNLIDILKESVDLKEKGKKNTRKRKLQLKIN	AAGCAACCCAACTTTTTAATCAATCTATCAAATCTAATTGATATTTTAAAGGAATCAGTTGATTTAAAAGAAAAAGGAAAAAAAAACACAAGAAAAAGAAAACTACAATTAAAGATTAAT	15.3257	101.927
C3_04950W_A-T_1065934_1066017_84	C3_04950W_A	ARF2	Ca22chr3A_C_albicans_SC5314	+	ATA	1065934-1066017	IFFIYLEIRINKSSNIINIINHKRIIYL	ATATTTTTTATTTATTTGGAGATCAGAATTAACAAATCATCCAATATAATAAATATAATCAATCATAAAAGAATCATCTATCTT	12.5823	47.1893
C3_04950W_A-T_1065890_1065979_90	C3_04950W_A	ARF2	Ca22chr3A_C_albicans_SC5314	+	ATT	1065890-1065979	IDILIPLTTEKSLFLYFLFIWRSELTNHPI	ATTGATATCTTAATACCACTAACTACAGAAAAGTCTTTGTTTTTATATTTTTTATTTATTTGGAGATCAGAATTAACAAATCATCCAATA	6.27933	17.9083
C3_04950W_A-T_1066055_1066117_63	C3_04950W_A	ARF2	Ca22chr3A_C_albicans_SC5314	+	CTG	1066055-1066117	LYFITVISSTCSFIKKEKILL	CTGTATTTTATAACTGTTATCAGTTCCACTTGTTCATTTATCAAAAAAGAAAAAATATTGTTG	41.4167	21.1083
C3_04950W_A-T_1066002_1066064_63	C3_04950W_A	ARF2	Ca22chr3A_C_albicans_SC5314	+	AAG	1066002-1066064	KNHLSLIFFSITRFSDKNCIL	AAGAATCATCTATCTTTAATTTTTTTTAGCATTACTAGATTTTCAGATAAAAACTGTATTTTA	13.4867	62.3393
C3_05000W_A-T_1074851_1074946_96	C3_05000W_A	RDI1	Ca22chr3A_C_albicans_SC5314	+	ATT	1074851-1074946	ILHPFLQSINQSILPLKEKKKLTYLLYNHILV	ATTTTACATCCATTTCTACAATCAATCAATCAATCAATCCTCCCCTTAAAAGAAAAAAAAAAACTCACATACCTTCTTTACAACCATATTCTAGTG	5.213	33.4257
C3_05000W_A-T_1074862_1074996_135	C3_05000W_A	RDI1	Ca22chr3A_C_albicans_SC5314	+	ATT	1074862-1074996	ISTINQSINPPLKRKKKTHIPSLQPYSSVNSISLLFLYISCFILF	ATTTCTACAATCAATCAATCAATCAATCCTCCCCTTAAAAGAAAAAAAAAAACTCACATACCTTCTTTACAACCATATTCTAGTGTGAATTCTATTTCTTTATTATTTTTATACATTTCTTGTTTTATATTATTC	3.97267	24.4393
C3_05150W_A-T_1103278_1103397_120	C3_05150W_A	C3_05150W_A	Ca22chr3A_C_albicans_SC5314	+	ATC	1103278-1103397	IRHSLTTKYLIQITYVLRSYIALGCVVFIINKRISLFFLF	ATCAGACATTCATTAACAACCAAGTATTTGATCCAAATAACATACGTCCTTAGAAGTTATATAGCATTAGGGTGTGTTGTTTTTATAATCAATAAAAGGATTAGTTTATTTTTTTTATTT	3.15033	17.7787
C3_05420W_A-T_1204632_1204766_135	C3_05420W_A	C3_05420W_A	Ca22chr3A_C_albicans_SC5314	+	ATT	1204632-1204766	IMSNFSFPSDVKKKKTQKKKSLLLLRLFNTFVMTKETKEREAKNK	ATTATGTCAAACTTTTCCTTTCCTTCTGACGTCAAAAAAAAAAAAACCCAAAAAAAAAAATCATTATTGTTGTTAAGACTATTTAACACCTTTGTCATGACAAAGGAAACCAAAGAAAGAGAGGCAAAAAATAAA	0.204	1.93767
C3_05700W_A-T_1273702_1273815_114	C3_05700W_A	CHS4	Ca22chr3A_C_albicans_SC5314	+	TTG	1273702-1273815	LTFSFFKHQRNIFNPLFSFPRLYWWFHISLFSLLIIDY	TTGACTTTTTCTTTTTTTAAACATCAGAGAAATATTTTCAATCCATTGTTTTCGTTCCCCAGACTTTATTGGTGGTTTCATATATCACTTTTTTCATTATTGATTATTGATTAT	0	6.18367
C3_05700W_A-T_1274269_1274334_66	C3_05700W_A	CHS4	Ca22chr3A_C_albicans_SC5314	+	ATT	1274269-1274334	IAIKRSKKKRGKKEKRKSKHEY	ATTGCAATCAAACGGTCAAAGAAGAAAAGAGGAAAAAAAGAAAAGAGAAAAAGCAAACACGAATAT	0	12.5897
C3_05700W_A-T_1274386_1274451_66	C3_05700W_A	CHS4	Ca22chr3A_C_albicans_SC5314	+	ATC	1274386-1274451	IKRRKKGRGKKKIFFIPLIIFN	ATCAAACGAAGGAAGAAAGGCAGAGGAAAAAAAAAAATATTTTTCATTCCATTAATAATTTTTAAT	0.417333	27.0323
C3_05700W_A-T_1274512_1274781_270	C3_05700W_A	CHS4	Ca22chr3A_C_albicans_SC5314	+	ATA	1274512-1274781	IHYTHYTSFTQKGGKNFFLKVSKFSFLIKFFFFFFSRFSLSIFEIRCSSIHHQLPTLPSSLPPTPSYSLHYRLIRQVDKLFPLKKPTCLY	ATACACTACACTCACTACACTTCTTTTACACAGAAAGGAGGAAAGAATTTTTTTTTGAAGGTTTCGAAATTTTCTTTTTTAATTAAATTTTTTTTTTTTTTTTTTTCCCGTTTTTCCCTTTCAATCTTTGAAATTCGTTGTTCTTCCATCCACCATCAACTACCAACACTTCCTTCCTCCCTCCCCCCCACTCCCTCCTACTCTCTACATTATAGATTAATACGACAGGTGGATAAACTATTCCCTTTAAAGAAACCAACCTGTCTATAT	7.705	5.155
C3_05700W_A-T_1274785_1274877_93	C3_05700W_A	CHS4	Ca22chr3A_C_albicans_SC5314	+	ATT	1274785-1274877	IITTTATFVSPHPFPPTFYFPFFFLSNSCTV	ATTATTACTACAACTGCAACCTTCGTTTCACCACATCCATTTCCACCCACTTTCTATTTCCCCTTTTTTTTTTTGTCCAACAGTTGCACAGTT	0	4.47567
C3_05700W_A-T_1273724_1273801_78	C3_05700W_A	CHS4	Ca22chr3A_C_albicans_SC5314	+	ATC	1273724-1273801	IREIFSIHCFRSPDFIGGFIYHFFHY	ATCAGAGAAATATTTTCAATCCATTGTTTTCGTTCCCCAGACTTTATTGGTGGTTTCATATATCACTTTTTTCATTAT	0	8.99033
C3_05700W_A-T_1274264_1274368_105	C3_05700W_A	CHS4	Ca22chr3A_C_albicans_SC5314	+	ATT	1274264-1274368	ILLQSNGQRRKEEKKKREKANTNINTQYTKTLINF	ATTTTATTGCAATCAAACGGTCAAAGAAGAAAAGAGGAAAAAAAGAAAAGAGAAAAAGCAAACACGAATATTAACACCCAATACACTAAAACACTAATAAATTTT	8.20067	8.942
C3_05700W_A-T_1274378_1274437_60	C3_05700W_A	CHS4	Ca22chr3A_C_albicans_SC5314	+	ATC	1274378-1274437	INQSNEGRKAEEKKKYFSFH	ATCAATCAATCAAACGAAGGAAGAAAGGCAGAGGAAAAAAAAAAATATTTTTCATTCCAT	0.459333	31.959
C3_05700W_A-T_1274639_1274728_90	C3_05700W_A	CHS4	Ca22chr3A_C_albicans_SC5314	+	TTG	1274639-1274728	LKFVVLPSTINYQHFLPPSPPLPPTLYIID	TTGAAATTCGTTGTTCTTCCATCCACCATCAACTACCAACACTTCCTTCCTCCCTCCCCCCCACTCCCTCCTACTCTCTACATTATAGAT	23.1153	9.14067
C3_05700W_A-T_1274780_1274956_177	C3_05700W_A	CHS4	Ca22chr3A_C_albicans_SC5314	+	ATT	1274780-1274956	IKLLLQLQPSFHHIHFHPLSISPFFFCPTVAQFDIYIYIYTLYQPSSIQHTIVIKVISP	ATTAAATTATTACTACAACTGCAACCTTCGTTTCACCACATCCATTTCCACCCACTTTCTATTTCCCCTTTTTTTTTTTGTCCAACAGTTGCACAGTTTGATATATATATATATATATATACATTATATCAACCTTCTTCCATTCAGCATACCATTGTCATTAAAGTAATATCACCC	1.868	4.71733
C3_05700W_A-T_1273746_1273808_63	C3_05700W_A	CHS4	Ca22chr3A_C_albicans_SC5314	+	ATT	1273746-1273808	IVFVPQTLLVVSYITFFIIDY	ATTGTTTTCGTTCCCCAGACTTTATTGGTGGTTTCATATATCACTTTTTTCATTATTGATTAT	0	10.7777
C3_05700W_A-T_1274259_1274357_99	C3_05700W_A	CHS4	Ca22chr3A_C_albicans_SC5314	+	GTG	1274259-1274357	VTFYCNQTVKEEKRKKRKEKKQTRILTPNTLKH	GTGACATTTTATTGCAATCAAACGGTCAAAGAAGAAAAGAGGAAAAAAAGAAAAGAGAAAAAGCAAACACGAATATTAACACCCAATACACTAAAACAC	8.698	9.18467
C3_05700W_A-T_1274364_1274447_84	C3_05700W_A	CHS4	Ca22chr3A_C_albicans_SC5314	+	ATT	1274364-1274447	IFSPESINQTKEERQRKKKNIFHSINNF	ATTTTTAGCCCAGAATCAATCAATCAAACGAAGGAAGAAAGGCAGAGGAAAAAAAAAAATATTTTTCATTCCATTAATAATTTT	0.328	22.9603
C3_05700W_A-T_1274649_1274723_75	C3_05700W_A	CHS4	Ca22chr3A_C_albicans_SC5314	+	TTG	1274649-1274723	LFFHPPSTTNTSFLPPPHSLLLSTL	TTGTTCTTCCATCCACCATCAACTACCAACACTTCCTTCCTCCCTCCCCCCCACTCCCTCCTACTCTCTACATTA	27.7383	10.5733
C3_05700W_A-T_1274751_1274945_195	C3_05700W_A	CHS4	Ca22chr3A_C_albicans_SC5314	+	ATT	1274751-1274945	IPFKETNLSILNYYYNCNLRFTTSISTHFLFPLFFFVQQLHSLIYIYIYIHYINLLPFSIPLSLK	ATTCCCTTTAAAGAAACCAACCTGTCTATATTAAATTATTACTACAACTGCAACCTTCGTTTCACCACATCCATTTCCACCCACTTTCTATTTCCCCTTTTTTTTTTTGTCCAACAGTTGCACAGTTTGATATATATATATATATATATACATTATATCAACCTTCTTCCATTCAGCATACCATTGTCATTAAAG	0.565333	4.62667
C3_06000W_A-T_1361988_1362092_105	C3_06000W_A	AHR1	Ca22chr3A_C_albicans_SC5314	+	ATC	1361988-1362092	IVSFFFSFFHCLTNQPPTYYFLSLSWVKSHLHSFS	ATCGTTTCATTTTTTTTTTCCTTTTTTCACTGTCTAACAAACCAACCCCCTACCTACTACTTCCTGTCCTTGTCTTGGGTAAAAAGTCACTTACATTCATTTAGT	9.26367	2.32433
C3_06000W_A-T_1362318_1362506_189	C3_06000W_A	AHR1	Ca22chr3A_C_albicans_SC5314	+	ATT	1362318-1362506	IPIIAVSIKTNKSRHTNGSRTFFPVYQLVKNLHLKLIFFYLTFFIHIILSYFHFISYVKIHIQ	ATTCCCATAATCGCAGTATCCATTAAGACGAACAAATCAAGACATACGAACGGAAGCAGAACATTTTTCCCAGTTTACCAATTGGTAAAAAACCTTCATTTAAAGTTGATCTTTTTTTATCTCACTTTCTTTATACATATAATTCTTTCATATTTTCATTTTATTTCATACGTTAAGATCCATATCCAA	14.052	1.549
C3_06000W_A-T_1362179_1362295_117	C3_06000W_A	AHR1	Ca22chr3A_C_albicans_SC5314	+	ATA	1362179-1362295	IIWELILVTVTHPWLLKSHSHRKDTLSISHSIIHLLFYN	ATAATTTGGGAACTCATATTGGTTACTGTCACCCACCCTTGGTTATTAAAATCACATAGCCATAGAAAAGATACCTTGTCAATTTCGCACTCTATCATTCATCTTCTTTTCTACAAC	0	3.29367
C3_06000W_A-T_1362353_1362490_138	C3_06000W_A	AHR1	Ca22chr3A_C_albicans_SC5314	+	ATC	1362353-1362490	IKTYERKQNIFPSLPIGKKPSFKVDLFLSHFLYTYNSFIFSFYFIR	ATCAAGACATACGAACGGAAGCAGAACATTTTTCCCAGTTTACCAATTGGTAAAAAACCTTCATTTAAAGTTGATCTTTTTTTATCTCACTTTCTTTATACATATAATTCTTTCATATTTTCATTTTATTTCATACGT	11.6327	1.074
C3_06300W_A-T_1433960_1434154_195	C3_06300W_A	DOT1	Ca22chr3A_C_albicans_SC5314	+	ATT	1433960-1434154	IGNICFRPKKSKQSHFTYQLPLLFQFYGRYNCTSNYLIVPQSCEASISHQICKERGYILNNKPMI	ATTGGTAATATTTGTTTTCGCCCTAAGAAAAGCAAACAATCTCATTTCACCTATCAACTACCATTGTTGTTTCAATTTTACGGTCGTTACAACTGTACTTCAAATTATCTAATTGTGCCTCAAAGTTGTGAAGCAAGTATCTCACATCAAATCTGTAAAGAGAGGGGATACATACTTAACAACAAGCCTATGATT	13.4883	4.184
C3_06300W_A-T_1434072_1434149_78	C3_06300W_A	DOT1	Ca22chr3A_C_albicans_SC5314	+	TTG	1434072-1434149	LCLKVVKQVSHIKSVKRGDTYLTTSL	TTGTGCCTCAAAGTTGTGAAGCAAGTATCTCACATCAAATCTGTAAAGAGAGGGGATACATACTTAACAACAAGCCTA	33.721	7.56267
C3_06300W_A-T_1433989_1434087_99	C3_06300W_A	DOT1	Ca22chr3A_C_albicans_SC5314	+	AAG	1433989-1434087	KQTISFHLSTTIVVSILRSLQLYFKLSNCASKL	AAGCAAACAATCTCATTTCACCTATCAACTACCATTGTTGTTTCAATTTTACGGTCGTTACAACTGTACTTCAAATTATCTAATTGTGCCTCAAAGTTG	8.44767	3.134
C3_06710W_A-T_1531619_1531708_90	C3_06710W_A	C3_06710W_A	Ca22chr3A_C_albicans_SC5314	+	ATT	1531619-1531708	IRQFYWQYVQEWLWLGHCLFPKQHYFYLSY	ATTCGACAATTTTATTGGCAATATGTACAGGAGTGGCTATGGTTGGGTCACTGCTTGTTTCCAAAACAGCATTATTTCTATTTATCATAT	2.58133	5.14867
C3_06710W_A-T_1531781_1531966_186	C3_06710W_A	C3_06710W_A	Ca22chr3A_C_albicans_SC5314	+	GTG	1531781-1531966	VPIYYTLVCPGKHFSKTCILISQVVLLVQYCLQVKKKISLTCLEFSSLQLLVFLPVLLCWVN	GTGCCGATATACTATACACTGGTTTGTCCTGGAAAACATTTTTCGAAAACTTGTATCCTAATTTCACAAGTGGTGCTGCTGGTTCAGTATTGCCTTCAGGTCAAAAAGAAAATTTCACTGACTTGTTTGGAATTTTCTTCCCTGCAACTGCTGGTATTTTTGCCGGTGCTTCTATGCTGGGTGAAT	0.933667	3.76367
C3_06710W_A-T_1532006_1532137_132	C3_06710W_A	C3_06710W_A	Ca22chr3A_C_albicans_SC5314	+	AAG	1532006-1532137	KVCFLHLSYTFQLSFLWGQLYLESYYTLISRSFKLSIYRVLLLY	AAGGTTTGTTTCTTACATTTGTCTTATACATTTCAGTTATCGTTTCTATGGGGGCAGCTATACCTCGAGAGTTATTATACGTTGATATCAAGGTCATTCAAACTGTCAATATATCGAGTATTGTTATTATAT	0.626333	3.97867
C3_06710W_A-T_1532423_1532506_84	C3_06710W_A	C3_06710W_A	Ca22chr3A_C_albicans_SC5314	+	AAG	1532423-1532506	KWAQLQISDHRSNISVAKRLSLVLQYVL	AAGTGGGCTCAGCTCCAAATTTCAGACCATCGTTCAAATATTTCAGTAGCAAAACGGCTTTCGCTGGTGCTACAGTATGTATTA	15.6893	8.31
C3_06710W_A-T_1532807_1532878_72	C3_06710W_A	C3_06710W_A	Ca22chr3A_C_albicans_SC5314	+	ACG	1532807-1532878	TMTPIHHVIQIKITEHFQQQLTRR	ACGATGACACCAATCCATCATGTAATTCAGATAAAAATTACCGAACATTTTCAACAGCAACTTACCAGGAGG	0.498333	6.913
C3_06710W_A-T_1532915_1533010_96	C3_06710W_A	C3_06710W_A	Ca22chr3A_C_albicans_SC5314	+	ATA	1532915-1533010	ICPKSKHLCRLLWDLLYLGVYVMFILVQDWVV	ATATGTCCAAAATCAAAGCATTTGTGCAGATTGCTTTGGGACCTACTTTACCTTGGGGTGTACGTAATGTTTATCTTGGTTCAGGATTGGGTGGTA	3.93833	1.351
C3_06710W_A-T_1531596_1531715_120	C3_06710W_A	C3_06710W_A	Ca22chr3A_C_albicans_SC5314	+	AGG	1531596-1531715	RILLAGNVFDNFIGNMYRSGYGWVTACFQNSIISIYHIDN	AGGATACTTTTGGCTGGTAATGTATTCGACAATTTTATTGGCAATATGTACAGGAGTGGCTATGGTTGGGTCACTGCTTGTTTCCAAAACAGCATTATTTCTATTTATCATATTGACAAT	1.936	4.32467
C3_06710W_A-T_1531725_1531838_114	C3_06710W_A	C3_06710W_A	Ca22chr3A_C_albicans_SC5314	+	ATC	1531725-1531838	IYSSINYFCEVLLPLTASMCRYTIHWFVLENIFRKLVS	ATCTATTCCAGTATCAACTATTTTTGTGAAGTCCTTTTACCCCTTACCGCCTCCATGTGCCGATATACTATACACTGGTTTGTCCTGGAAAACATTTTTCGAAAACTTGTATCC	1.20833	2.949
C3_06710W_A-T_1532007_1532087_81	C3_06710W_A	C3_06710W_A	Ca22chr3A_C_albicans_SC5314	+	AGG	1532007-1532087	RFVSYICLIHFSYRFYGGSYTSRVIIR	AGGTTTGTTTCTTACATTTGTCTTATACATTTCAGTTATCGTTTCTATGGGGGCAGCTATACCTCGAGAGTTATTATACGT	0	4.608
C3_06710W_A-T_1532118_1532213_96	C3_06710W_A	C3_06710W_A	Ca22chr3A_C_albicans_SC5314	+	ATC	1532118-1532213	IEYCYYIRRIFHIFVFSDHGYCWCLGNDYCHC	ATCGAGTATTGTTATTATATTAGGAGAATTTTCCACATCTTTGTTTTCAGTGATCATGGGTATTGTTGGTGCCTCGGCAATGATTACTGCCATTGC	11.8143	5.70433
C3_06710W_A-T_1532232_1532294_63	C3_06710W_A	C3_06710W_A	Ca22chr3A_C_albicans_SC5314	+	AGG	1532232-1532294	RVVKFYNFEKVTKGEEESTNI	AGGGTTGTCAAGTTTTACAACTTTGAAAAAGTCACCAAAGGAGAAGAAGAAAGCACAAATATA	3.35133	4.05867
C3_06710W_A-T_1532409_1532468_60	C3_06710W_A	C3_06710W_A	Ca22chr3A_C_albicans_SC5314	+	TTG	1532409-1532468	LFLIKSGLSSKFQTIVQIFQ	TTGTTTCTTATTAAAAGTGGGCTCAGCTCCAAATTTCAGACCATCGTTCAAATATTTCAG	13.9387	11.1397
C3_06710W_A-T_1532541_1532609_69	C3_06710W_A	C3_06710W_A	Ca22chr3A_C_albicans_SC5314	+	ATT	1532541-1532609	IGYILHDFLDLVNSLSVSTFQIW	ATTGGTTATATTTTGCATGACTTTCTTGATCTTGTTAATTCATTATCTGTCTCCACCTTCCAAATTTGG	0	4.12067
C3_06710W_A-T_1532853_1532978_126	C3_06710W_A	C3_06710W_A	Ca22chr3A_C_albicans_SC5314	+	ATT	1532853-1532978	IFNSNLPGGEKTKASVDQIKRYVQNQSICADCFGTYFTLGCT	ATTTTCAACAGCAACTTACCAGGAGGTGAGAAAACAAAAGCAAGCGTGGATCAAATTAAGAGATATGTCCAAAATCAAAGCATTTGTGCAGATTGCTTTGGGACCTACTTTACCTTGGGGTGTACG	2.24533	5.715
C3_06850W_A-T_1567946_1568014_69	C3_06850W_A	FCR1	Ca22chr3A_C_albicans_SC5314	+	AAG	1567946-1568014	KLQKLTVVVIPTRGADKITSIYK	AAGCTTCAGAAACTAACCGTAGTAGTTATACCGACACGGGGTGCTGATAAGATAACATCTATATACAAA	13.261	1.77233
C3_06850W_A-T_1567776_1567865_90	C3_06850W_A	FCR1	Ca22chr3A_C_albicans_SC5314	+	AAG	1567776-1567865	KKTKNYSLNIPILIISTSIFLFRSCKRAFH	AAGAAAACTAAAAACTACAGTTTAAATATCCCAATTCTGATTATTTCAACATCAATCTTTTTATTTCGGTCGTGCAAAAGAGCCTTTCAT	0.918333	1.44667
C3_06850W_A-T_1568172_1568282_111	C3_06850W_A	FCR1	Ca22chr3A_C_albicans_SC5314	+	ATT	1568172-1568282	INCRNFFFYSRVVLHKNYSKKIRIIQISLPPWLRQNN	ATTAATTGCCGCAACTTTTTTTTTTATAGCCGAGTGGTTTTACATAAAAATTATTCAAAAAAAATTCGGATAATTCAAATTAGCTTACCTCCGTGGCTAAGACAAAATAAT	5.96267	1.53567
C3_06850W_A-T_1567909_1567989_81	C3_06850W_A	FCR1	Ca22chr3A_C_albicans_SC5314	+	ATA	1567909-1567989	ILISQRTLRYLSQASETNRSSYTDTGC	ATACTGATTAGTCAGCGCACTTTGAGATATTTAAGTCAAGCTTCAGAAACTAACCGTAGTAGTTATACCGACACGGGGTGC	10.4103	1.92133
C3_06880W_A-T_1575939_1576007_69	C3_06880W_A	C3_06880W_A	Ca22chr3A_C_albicans_SC5314	+	ATA	1575939-1576007	ISYIEENIDVFFFCFYIGVCSYK	ATATCTTACATTGAAGAGAATATTGATGTGTTTTTTTTTTGTTTTTATATAGGTGTTTGCAGTTATAAG	22.8263	216.73
C3_06880W_A-T_1575991_1576071_81	C3_06880W_A	C3_06880W_A	Ca22chr3A_C_albicans_SC5314	+	GTG	1575991-1576071	VFAVISKTNIISGIYIITKKIKYYKRV	GTGTTTGCAGTTATAAGTAAGACCAATATCATATCTGGAATATATATAATTACAAAAAAAATTAAATATTACAAGCGCGTA	25.226	178.184
C3_07020W_A-T_1607502_1607600_99	C3_07020W_A	SSN6	Ca22chr3A_C_albicans_SC5314	+	ATT	1607502-1607600	IGKSHRVGLLNSFNPFPFPFPFPIIKHTTLYTN	ATTGGAAAAAGTCACAGAGTTGGTTTACTTAATTCATTCAATCCGTTCCCATTTCCATTTCCATTTCCAATTATTAAACACACTACATTGTACACAAAT	7.18833	5.57233
C3_07020W_A-T_1607491_1607625_135	C3_07020W_A	SSN6	Ca22chr3A_C_albicans_SC5314	+	ATA	1607491-1607625	ISNKLEKVTELVYLIHSIRSHFHFHFQLLNTLHCTQIRTEKKRDF	ATAAGTAATAAATTGGAAAAAGTCACAGAGTTGGTTTACTTAATTCATTCAATCCGTTCCCATTTCCATTTCCATTTCCAATTATTAAACACACTACATTGTACACAAATTAGAACTGAAAAAAAAAGAGATTTC	5.67967	5.89767
C3_07020W_A-T_1607722_1607886_165	C3_07020W_A	SSN6	Ca22chr3A_C_albicans_SC5314	+	CTG	1607722-1607886	LDFQREEEENKKQSTFHQLNYSFLYLNCIISLLNCCISVLIYIFETKQVKTPFFW	CTGGACTTTCAACGAGAAGAAGAAGAAAATAAAAAACAATCTACCTTTCACCAGCTCAACTATTCATTTCTTTATTTGAATTGTATTATCTCATTATTGAATTGTTGTATTTCTGTTTTGATATACATTTTTGAAACAAAACAGGTCAAAACCCCCTTTTTTTGG	4.49067	15.1147
C3_07060W_A-T_1616303_1616365_63	C3_07060W_A	FESUR1	Ca22chr3A_C_albicans_SC5314	+	AAG	1616303-1616365	KKKNCKTYNHIYHPIHTVYKH	AAGAAGAAGAACTGCAAGACTTACAATCACATCTACCATCCAATTCATACAGTATATAAACAT	4.15967	16.967
C3_07060W_A-T_1616381_1616449_69	C3_07060W_A	FESUR1	Ca22chr3A_C_albicans_SC5314	+	ATA	1616381-1616449	IYLFIHSQKTKGFSFTITRTIFF	ATATATTTATTCATTCATTCACAAAAAACAAAAGGTTTTTCTTTTACAATAACTAGAACCATATTTTTT	12.617	2.86133
C3_07060W_A-T_1616298_1616429_132	C3_07060W_A	FESUR1	Ca22chr3A_C_albicans_SC5314	+	ATT	1616298-1616429	IERRRTARLTITSTIQFIQYINIRRTYIYIYSFIHKKQKVFLLQ	ATTGAAAGAAGAAGAACTGCAAGACTTACAATCACATCTACCATCCAATTCATACAGTATATAAACATTAGGAGGACTTATATATATATTTATTCATTCATTCACAAAAAACAAAAGGTTTTTCTTTTACAA	10.0417	11.3737
C3_07060W_A-T_1616299_1616358_60	C3_07060W_A	FESUR1	Ca22chr3A_C_albicans_SC5314	+	TTG	1616299-1616358	LKEEELQDLQSHLPSNSYSI	TTGAAAGAAGAAGAACTGCAAGACTTACAATCACATCTACCATCCAATTCATACAGTATA	2.99	17.6917
C3_07560W_A-T_1729791_1729925_135	C3_07560W_A	TCC1	Ca22chr3A_C_albicans_SC5314	+	TTG	1729791-1729925	LIFKLYCTFKISSFASNLVTCLSLIVKFDSNSFTNPPINILHTFS	TTGATATTCAAATTATACTGTACTTTTAAAATATCTTCCTTTGCATCAAATTTAGTCACCTGCCTCTCCCTCATTGTCAAATTTGATTCAAACTCATTCACTAACCCTCCTATTAATATTCTCCATACATTCAGC	5.77233	1.33767
C3_07560W_A-T_1729864_1729944_81	C3_07560W_A	TCC1	Ca22chr3A_C_albicans_SC5314	+	TTG	1729864-1729944	LSNLIQTHSLTLLLIFSIHSAEQYFQY	TTGTCAAATTTGATTCAAACTCATTCACTAACCCTCCTATTAATATTCTCCATACATTCAGCTGAACAATATTTTCAATAC	0.443	1.63433
C3_07590W_A-T_1733726_1733788_63	C3_07590W_A	C3_07590W_A	Ca22chr3A_C_albicans_SC5314	+	CTG	1733726-1733788	LFMVNWSQSLLSFFFPLYSYY	CTGTTTATGGTAAATTGGTCTCAATCTTTGCTTTCTTTTTTTTTCCCCCTTTACTCCTATTAC	0.569667	3.36067
C3_07590W_A-T_1733739_1733804_66	C3_07590W_A	C3_07590W_A	Ca22chr3A_C_albicans_SC5314	+	ATT	1733739-1733804	IGLNLCFLFFSPFTPITSSGNL	ATTGGTCTCAATCTTTGCTTTCTTTTTTTTTCCCCCTTTACTCCTATTACTAGTTCAGGTAATCTT	0	3.43267
C3_07590W_A-T_1733722_1733856_135	C3_07590W_A	C3_07590W_A	Ca22chr3A_C_albicans_SC5314	+	ATT	1733722-1733856	ITVYGKLVSIFAFFFFPPLLLLLVQVIFKPNYYRFYVVMICLVCG	ATTACTGTTTATGGTAAATTGGTCTCAATCTTTGCTTTCTTTTTTTTTCCCCCTTTACTCCTATTACTAGTTCAGGTAATCTTTAAACCCAATTATTATAGGTTCTATGTCGTCATGATCTGTTTGGTTTGTGGA	0.469667	3.023
C4_00540C_A-T_96791_96877_87	C4_00540C_A	NMD5	Ca22chr4A_C_albicans_SC5314	-	AAG	96791-96877	KKLDFFFFFFFHKNPRIPKRFNPNLNTSA	AAGAAACTTGATTTTTTTTTTTTTTTTTTTTTTCATAAAAATCCAAGAATTCCAAAAAGATTCAACCCCAATCTCAACACCTCTGCC	1.14133	8.56733
C4_00670W_A-T_113437_113526_90	C4_00670W_A	TOK1	Ca22chr4A_C_albicans_SC5314	+	ACG	113437-113526	TDLVPVDLYIVPLFFFFSLSQSQLIVNIYR	ACGGATTTAGTCCCAGTTGATTTGTACATAGTTCCGCTTTTTTTTTTTTTCTCTCTGTCTCAGTCGCAGCTCATTGTGAATATATATCGA	3.286	8.51367
C4_00840W_A-T_149505_149588_84	C4_00840W_A	C4_00840W_A	Ca22chr4A_C_albicans_SC5314	+	ATG	149505-149588	METGAMMIMKTTIIHIKKTILLNNNREK	ATGGAGACTGGGGCGATGATGATTATGAAGACGACGATTATACATATCAAGAAGACAATTCTTCTCAACAACAACAGAGAAAAG	9.551	9.70967
C4_00840W_A-T_149604_149693_90	C4_00840W_A	C4_00840W_A	Ca22chr4A_C_albicans_SC5314	+	TTG	149604-149693	LSYLVIMFHLCQLLTKNIKILLLKTTPKAM	TTGAGTTACCTAGTGATCATGTTCCACCTGTGCCAGTTATTGACGAAAAATATAAAAATCTTACTTCTCAAAACAACACCGAAAGCAATG	4.592	6.358
C4_00840W_A-T_149706_149855_150	C4_00840W_A	C4_00840W_A	Ca22chr4A_C_albicans_SC5314	+	AAG	149706-149855	KNLCCLLMDKLILRVIVVMKNPRSLVKGVLVRIKKQISKHMVFPTTLTRN	AAGAACTTGTGTTGTCTGTTGATGGACAAACTAATCTTGAGAGTGATAGTAGTGATGAAGAATCCGAGATCATTAGTCAAGGGGGTGTTAGTCCGTATAAAGAAGCAAATAAGCAAACACATGGTATTTCCCACAACGTTGACGAGAAAC	3.67367	34.5663
C4_00840W_A-T_149871_149951_81	C4_00840W_A	C4_00840W_A	Ca22chr4A_C_albicans_SC5314	+	ATC	149871-149951	IRLTFLLLHPMIDLIIMKRIIMILLEN	ATCAGGCTAACATTCCTGTTGTTGCATCCCATGATAGATCTGATTATAATGAAGAGGATAATAATGATTTTACTAGAAAAT	42.5227	13.8073
C4_00840W_A-T_149970_150242_273	C4_00840W_A	C4_00840W_A	Ca22chr4A_C_albicans_SC5314	+	AAG	149970-150242	KNQITRIWHNQKFRKDRKMNLILLTKCQNHLQLNNNQTWYCQLILIKTFIQIVVMKTTTMTIRVRILILEYQPIVLEILQQIQHLKITLQP	AAGAATCAAATCACGAGGATTTGGCACAATCAGAAGTTCAGGAAGGACAGAAAGATGAACCTGATTCTGTTAACCAAGTGTCAGAACCATCTTCAACTAAACAACAACCAAACTTGGTATTGTCAGTTGATACTCATAAAAACATTTATTCAGATAGTAGTGATGAAGACGACGACGATGACGATACGTGTTCGAATCTTAATTTTGGAATATCAACCCATAGTCTTGGAAATATTGCAACAGATTCAACATCTAAAAATAACGTTACAACCT	9.763	68.874
C4_00840W_A-T_149458_149520_63	C4_00840W_A	C4_00840W_A	Ca22chr4A_C_albicans_SC5314	+	ATT	149458-149520	IWKTKINTLGKLSSNLWRLGR	ATTTGGAAGACAAAAATCAACACGTTGGGTAAACTCAGTTCCAACTTATGGAGACTGGGGCGA	1.007	1.05867
C4_00960W_A-T_173907_174029_123	C4_00960W_A	PTC8	Ca22chr4A_C_albicans_SC5314	+	ATC	173907-174029	INYLYTTHYTLLTLLLTSLPHLSFFIHSCNHPPTHLPTYSL	ATCAACTACTTATACACTACTCACTATACACTACTCACACTACTTTTAACATCACTACCACATCTTTCTTTCTTTATCCACTCTTGCAACCACCCACCCACACACCTACCTACCTATTCCTTA	26.001	6.009
C4_00960W_A-T_174036_174155_120	C4_00960W_A	PTC8	Ca22chr4A_C_albicans_SC5314	+	ATT	174036-174155	IFNSTFLPFTGFCFFAFNTLLPPPPSPQQQQHLPLPLPFA	ATTTTTAACTCTACTTTTCTTCCCTTTACAGGTTTTTGTTTTTTTGCATTCAATACATTATTACCACCACCACCATCACCACAACAACAACAACATCTTCCACTTCCACTTCCATTTGCT	132.779	87.923
C4_00960W_A-T_174258_174395_138	C4_00960W_A	PTC8	Ca22chr4A_C_albicans_SC5314	+	ATT	174258-174395	IQYYFNSLRLPDTKFTYIYIYTSFFPYQYKFIQHLVNFFFSTIHYY	ATTCAATACTATTTTAATTCCCTCCGCCTACCTGATACTAAATTCACATATATATATATATATACATCCTTTTTCCCATACCAATATAAATTTATTCAACATTTGGTAAATTTTTTTTTTTCAACTATACACTACTAC	6.49667	6.36033
C4_00960W_A-T_173968_174033_66	C4_00960W_A	PTC8	Ca22chr4A_C_albicans_SC5314	+	ATC	173968-174033	IFLSLSTLATTHPHTYLPIPYN	ATCTTTCTTTCTTTATCCACTCTTGCAACCACCCACCCACACACCTACCTACCTATTCCTTATAAC	38.3443	6.00767
C4_00960W_A-T_174079_174168_90	C4_00960W_A	PTC8	Ca22chr4A_C_albicans_SC5314	+	TTG	174079-174168	LHSIHYYHHHHHHNNNNIFHFHFHLLDLPF	TTGCATTCAATACATTATTACCACCACCACCATCACCACAACAACAACAACATCTTCCACTTCCACTTCCATTTGCTTGATTTGCCATTT	177.33	118.466
C4_00960W_A-T_174181_174246_66	C4_00960W_A	PTC8	Ca22chr4A_C_albicans_SC5314	+	GTG	174181-174246	VGFRISIVVQFTQLINRNYNTI	GTGGGATTTAGGATTTCTATCGTTGTTCAATTCACACAACTCATAAACCGTAACTATAATACTATC	53.7437	28.5303
C4_00960W_A-T_174268_174363_96	C4_00960W_A	PTC8	Ca22chr4A_C_albicans_SC5314	+	ATT	174268-174363	ILIPSAYLILNSHIYIYIHPFSHTNINLFNIW	ATTTTAATTCCCTCCGCCTACCTGATACTAAATTCACATATATATATATATATACATCCTTTTTCCCATACCAATATAAATTTATTCAACATTTGG	8.47733	7.63767
C4_00960W_A-T_173903_174040_138	C4_00960W_A	PTC8	Ca22chr4A_C_albicans_SC5314	+	ATT	173903-174040	INQLLIHYSLYTTHTTFNITTTSFFLYPLLQPPTHTPTYLFLITNF	ATTAATCAACTACTTATACACTACTCACTATACACTACTCACACTACTTTTAACATCACTACCACATCTTTCTTTCTTTATCCACTCTTGCAACCACCCACCCACACACCTACCTACCTATTCCTTATAACTAATTTT	23.1747	5.73167
C4_00960W_A-T_174065_174223_159	C4_00960W_A	PTC8	Ca22chr4A_C_albicans_SC5314	+	AGG	174065-174223	RFLFFCIQYIITTTTITTTTTTSSTSTSICLICHFDLLTWDLGFLSLFNSHNS	AGGTTTTTGTTTTTTTGCATTCAATACATTATTACCACCACCACCATCACCACAACAACAACAACATCTTCCACTTCCACTTCCATTTGCTTGATTTGCCATTTTGATTTGCTTACGTGGGATTTAGGATTTCTATCGTTGTTCAATTCACACAACTCA	121.221	76.0343
C4_00960W_B-T_173932_174054_123	C4_00960W_B	C4_00960W_B	Ca22chr4B_C_albicans_SC5314	+	ATC	173932-174054	INYLYTTHYTLLTLLLTSPLHLSFFIHSCNHPPTDLPTYSL	ATCAACTACTTATACACTACTCACTATACACTACTCACACTACTTTTAACATCACCACTACATCTTTCTTTCTTTATCCACTCTTGCAACCACCCACCCACAGACCTACCTACCTATTCCTTA	1.995	3.06067
C4_00960W_B-T_173993_174058_66	C4_00960W_B	C4_00960W_B	Ca22chr4B_C_albicans_SC5314	+	ATC	173993-174058	IFLSLSTLATTHPQTYLPIPYN	ATCTTTCTTTCTTTATCCACTCTTGCAACCACCCACCCACAGACCTACCTACCTATTCCTTATAAC	3.71833	2.80733
C4_00960W_B-T_173928_174065_138	C4_00960W_B	C4_00960W_B	Ca22chr4B_C_albicans_SC5314	+	ATT	173928-174065	INQLLIHYSLYTTHTTFNITTTSFFLYPLLQPPTHRPTYLFLITNF	ATTAATCAACTACTTATACACTACTCACTATACACTACTCACACTACTTTTAACATCACCACTACATCTTTCTTTCTTTATCCACTCTTGCAACCACCCACCCACAGACCTACCTACCTATTCCTTATAACTAATTTT	1.77833	2.728
C4_01300W_A-T_263701_263817_117	C4_01300W_A	C4_01300W_A	Ca22chr4A_C_albicans_SC5314	+	AAG	263701-263817	KNLKRNKKQQEDQFTTYFIQNSARCIFKTHHNYIQFMIY	AAGAATTTAAAACGAAACAAGAAACAGCAAGAAGACCAATTCACAACATACTTCATACAGAACTCAGCACGTTGCATATTTAAAACACATCATAATTACATCCAATTTATGATTTAT	7.973	5.84633
C4_01300W_A-T_263438_263503_66	C4_01300W_A	C4_01300W_A	Ca22chr4A_C_albicans_SC5314	+	ATT	263438-263503	ILHFHSLLFIVIFSLFNYKLTD	ATTTTGCATTTCCATTCTCTTCTATTTATTGTTATATTTAGCTTATTCAATTATAAGTTAACTGAT	2.52933	0.280667
C4_01300W_A-T_263729_263809_81	C4_01300W_A	C4_01300W_A	Ca22chr4A_C_albicans_SC5314	+	AAG	263729-263809	KKTNSQHTSYRTQHVAYLKHIIITSNL	AAGAAGACCAATTCACAACATACTTCATACAGAACTCAGCACGTTGCATATTTAAAACACATCATAATTACATCCAATTTA	11.5167	6.06
C4_01300W_A-T_263499_263630_132	C4_01300W_A	C4_01300W_A	Ca22chr4A_C_albicans_SC5314	+	CTG	263499-263630	LIRIYSPNYYNYHYYFWIKKQFRFFFFLFPFLPTNSKYLQQFIY	CTGATTAGAATCTACTCACCAAACTACTACAACTACCACTACTACTTTTGGATCAAAAAGCAATTTAGATTTTTTTTTTTTCTTTTTCCTTTTCTTCCAACCAATTCAAAATATCTTCAACAATTCATATAT	1.59967	1.123
C4_01300W_A-T_263673_263780_108	C4_01300W_A	C4_01300W_A	Ca22chr4A_C_albicans_SC5314	+	ATT	263673-263780	IHTPRKVVIKEFKTKQETARRPIHNILHTELSTLHI	ATTCATACTCCAAGGAAAGTAGTAATAAAAGAATTTAAAACGAAACAAGAAACAGCAAGAAGACCAATTCACAACATACTTCATACAGAACTCAGCACGTTGCATATT	8.63733	4.67567
C4_01500W_A-T_312570_312707_138	C4_01500W_A	C4_01500W_A	Ca22chr4A_C_albicans_SC5314	+	AAG	312570-312707	KMNNYNNNNNNNNNKKQIFNCIDMCLLFFSLLGFMFLCILLDSIFI	AAGATGAACAACTACAACAACAACAACAACAACAATAACAATAAAAAGCAAATATTTAACTGTATAGACATGTGTTTATTATTTTTTTCTTTATTAGGTTTCATGTTTCTTTGTATATTACTTGATTCAATTTTCATA	3.21767	9.794
C4_01500W_A-T_312629_312691_63	C4_01500W_A	C4_01500W_A	Ca22chr4A_C_albicans_SC5314	+	CTG	312629-312691	LYRHVFIIFFFIRFHVSLYIT	CTGTATAGACATGTGTTTATTATTTTTTTCTTTATTAGGTTTCATGTTTCTTTGTATATTACT	1.312	4.53733
C4_01500W_A-T_312743_312805_63	C4_01500W_A	C4_01500W_A	Ca22chr4A_C_albicans_SC5314	+	ATG	312743-312805	MGWWFVMDLLYDHEEKKNKEM	ATGGGATGGTGGTTTGTTATGGATTTGTTGTATGACCATGAAGAAAAAAAAAATAAAGAAATG	1.007	0.941
C4_01720C_A-T_342243_342323_81	C4_01720C_A	C4_01720C_A	Ca22chr4A_C_albicans_SC5314	-	ATC	342243-342323	INEKKNFAYHILKLAHVKKNIFYLLPL	ATCAACGAAAAAAAAAACTTTGCATACCACATTCTTAAACTTGCTCACGTTAAAAAGAATATATTCTACCTACTTCCACTT	55.8557	32.678
C4_01720C_A-T_342042_342101_60	C4_01720C_A	C4_01720C_A	Ca22chr4A_C_albicans_SC5314	-	AAG	342042-342101	KLQRKKKTRITFHKHTYIYI	AAGCTTCAAAGAAAAAAAAAAACAAGGATCACATTTCATAAACACACATATATATATATA	5.46767	26.6807
C4_01720C_A-T_342116_342319_204	C4_01720C_A	C4_01720C_A	Ca22chr4A_C_albicans_SC5314	-	ACG	342116-342319	TKKKTLHTTFLNLLTLKRIYSTYFHFETHLRIISINQSINQSFLLELKLGLLCIYKKNKKGDIIRKLN	ACGAAAAAAAAAACTTTGCATACCACATTCTTAAACTTGCTCACGTTAAAAAGAATATATTCTACCTACTTCCACTTTGAAACTCATCTACGAATAATCTCAATCAATCAATCAATTAACCAATCATTTTTGCTGGAGTTGAAACTGGGTTTATTGTGTATATATAAAAAGAATAAGAAGGGTGATATTATCAGGAAATTAAAT	42.0437	42.421
C4_01720C_B-T_342299_342379_81	C4_01720C_B	C4_01720C_B	Ca22chr4B_C_albicans_SC5314	-	ATC	342299-342379	INEKKNFAYHILKLAHVKKSIFYLLPL	ATCAACGAAAAAAAAAACTTTGCATACCACATTCTTAAACTTGCTCACGTTAAAAAGAGTATATTCTACCTACTTCCACTT	3.16433	3.33967
C4_01990W_A-T_387672_387749_78	C4_01990W_A	C4_01990W_A	Ca22chr4A_C_albicans_SC5314	+	ATT	387672-387749	ISNLSGVTTLPSTPLPGYYLYIVLPT	ATTTCAAATTTGTCTGGTGTAACAACCCTACCGTCAACCCCTCTGCCAGGATACTACTTGTACATAGTTTTACCAACC	8.561	7.07467
C4_02030W_A-T_404375_404488_114	C4_02030W_A	RFX2	Ca22chr4A_C_albicans_SC5314	+	AAG	404375-404488	KKRKPHRYFFNKQRYRITNTCTPFYNAISKKKKEKSIL	AAGAAAAGAAAACCCCATCGATATTTTTTTAATAAACAGAGATATCGTATAACAAATACTTGCACACCATTTTACAACGCTATTTCGAAAAAAAAAAAGGAAAAGAGTATACTG	0	2.54467
C4_02030W_A-T_404298_404423_126	C4_02030W_A	RFX2	Ca22chr4A_C_albicans_SC5314	+	ACG	404298-404423	TLDFGNSHQLTFSYTATHKHTCANKTRKENPIDIFLINRDIV	ACGTTAGATTTCGGTAACTCACATCAATTGACATTTTCATACACTGCAACACATAAACACACCTGTGCCAATAAAACAAGAAAAGAAAACCCCATCGATATTTTTTTAATAAACAGAGATATCGTA	0.284667	2.83133
C4_02030W_A-T_404430_404501_72	C4_02030W_A	RFX2	Ca22chr4A_C_albicans_SC5314	+	ATA	404430-404501	ILAHHFTTLFRKKKRKRVYCDFIL	ATACTTGCACACCATTTTACAACGCTATTTCGAAAAAAAAAAAGGAAAAGAGTATACTGTGATTTTATTTTG	0	2.426
C4_02030W_A-T_404341_404403_63	C4_02030W_A	RFX2	Ca22chr4A_C_albicans_SC5314	+	CTG	404341-404403	LQHINTPVPIKQEKKTPSIFF	CTGCAACACATAAACACACCTGTGCCAATAAAACAAGAAAAGAAAACCCCATCGATATTTTTT	0	4.60433
C4_02030W_A-T_404416_404532_117	C4_02030W_A	RFX2	Ca22chr4A_C_albicans_SC5314	+	ATA	404416-404532	ISYNKYLHTILQRYFEKKKGKEYTVILFCKNTSLNHTIS	ATATCGTATAACAAATACTTGCACACCATTTTACAACGCTATTTCGAAAAAAAAAAAGGAAAAGAGTATACTGTGATTTTATTTTGTAAAAATACAAGTCTAAATCACACAATTAGC	0	1.683
C4_02250C_A-T_445579_445677_99	C4_02250C_A	BGL2	Ca22chr4A_C_albicans_SC5314	-	ATA	445579-445677	IDPIIYKSHQLHSYTHFFPSLYLISSFVFPSVF	ATAGATCCTATTATATATAAGTCACATCAACTTCATTCTTATACCCACTTCTTCCCATCCTTATATTTAATATCTTCATTCGTTTTCCCTTCAGTTTTT	6.71167	34.6867
C4_02250C_A-T_445611_445673_63	C4_02250C_A	BGL2	Ca22chr4A_C_albicans_SC5314	-	ATC	445611-445673	ILLYISHINFILIPTSSHPYI	ATCCTATTATATATAAGTCACATCAACTTCATTCTTATACCCACTTCTTCCCATCCTTATATT	10.1097	51.5583
C4_02270C_A-T_449192_449299_108	C4_02270C_A	BFR1	Ca22chr4A_C_albicans_SC5314	-	ATT	449192-449299	IYTYLANLLFCCRCLLSIFLIWFLCLFPPCSSPLGV	ATTTACACATATTTAGCAAATCTATTATTTTGTTGTAGGTGTTTACTTAGTATTTTCTTAATTTGGTTTCTTTGTTTGTTTCCTCCCTGTTCATCTCCATTAGGTGTT	3.72567	5.00467
C4_02270C_B-T_449245_449352_108	C4_02270C_B	C4_02270C_B	Ca22chr4B_C_albicans_SC5314	-	ATT	449245-449352	IYTYLANLLFCCRCLLSIFLIWFLCLFPPCSSPLGV	ATTTACACATATTTAGCAAATCTATTATTTTGTTGTAGGTGTTTACTTAGTATTTTCTTAATTTGGTTTCTTTGTTTGTTCCCTCCCTGTTCATCTCCATTAGGTGTT	1.786	6.00133
C4_02280W_A-T_449981_450067_87	C4_02280W_A	IDI1	Ca22chr4A_C_albicans_SC5314	+	ATT	449981-450067	ILPIDRFYLNFLLFSFFILDFASYFTGFE	ATTCTTCCAATTGATCGATTTTACTTGAACTTTCTTTTGTTTTCATTTTTTATTCTTGATTTTGCATCTTACTTTACTGGATTTGAA	3.10767	5.545
C4_02280W_A-T_449937_450005_69	C4_02280W_A	IDI1	Ca22chr4A_C_albicans_SC5314	+	ATT	449937-450005	IGPFIHLVAGFTLNRFFQLIDFT	ATTGGTCCATTTATACATCTTGTTGCTGGATTTACATTGAATAGATTCTTCCAATTGATCGATTTTACT	3.12	11.0197
C4_02320C_A-T_461566_461637_72	C4_02320C_A	SOD1	Ca22chr4A_C_albicans_SC5314	-	AAG	461566-461637	KLVCNSMQLYLNGCKIIEKETIII	AAGCTGGTATGTAATTCAATGCAATTGTATCTTAATGGTTGCAAAATAATAGAAAAAGAAACAATTATAATC	16.9497	18.4513
C4_02330C_A-T_463151_463246_96	C4_02330C_A	C4_02330C_A	Ca22chr4A_C_albicans_SC5314	-	ATT	463151-463246	IHYSILSHSSQIPWVITITSNKSTAQTSNIAN	ATTCATTACTCAATTCTCTCACATTCATCACAAATACCTTGGGTGATAACTATTACATCAAACAAATCAACTGCTCAAACTTCTAACATAGCCAAT	12.5667	1.30167
C4_02470C_A-T_499135_499197_63	C4_02470C_A	C4_02470C_A	Ca22chr4A_C_albicans_SC5314	-	AAG	499135-499197	KSNQPINQPTNNEKSNQPIQI	AAGTCCAACCAACCAATCAATCAACCAACCAACAACGAAAAATCAAACCAACCAATTCAAATT	6.30533	18.7047
C4_02470C_A-T_499083_499238_156	C4_02470C_A	C4_02470C_A	Ca22chr4A_C_albicans_SC5314	-	ATA	499083-499238	INRIYLYIPQSKDKSPTNQSINQPTTKNQTNQFKFDSIEISKINLYYFITVN	ATAAATCGCATATATTTATATATACCACAATCAAAGGATAAAAGTCCAACCAACCAATCAATCAACCAACCAACAACGAAAAATCAAACCAACCAATTCAAATTTGATTCAATTGAAATTAGTAAAATTAATTTATATTATTTTATAACCGTCAAT	2.77633	9.695
C4_02470C_A-T_499094_499234_141	C4_02470C_A	C4_02470C_A	Ca22chr4A_C_albicans_SC5314	-	ATC	499094-499234	IAYIYIYHNQRIKVQPTNQSTNQQRKIKPTNSNLIQLKLVKLIYIIL	ATCGCATATATTTATATATACCACAATCAAAGGATAAAAGTCCAACCAACCAATCAATCAACCAACCAACAACGAAAAATCAAACCAACCAATTCAAATTTGATTCAATTGAAATTAGTAAAATTAATTTATATTATTTTA	3.07167	10.4897
C4_02740W_A-T_571608_571817_210	C4_02740W_A	C4_02740W_A	Ca22chr4A_C_albicans_SC5314	+	ATC	571608-571817	IISNIPIKFYICHSFFCYLQFNLLNLETTFCYLLTYKLPTIISNQNRFYTCTLFFYSQKKPKPKPKPNTQ	ATCATTTCAAATATTCCGATTAAGTTTTATATTTGCCATTCCTTTTTTTGTTATCTTCAATTTAATTTGCTGAACCTAGAAACAACTTTCTGCTACTTACTTACATATAAGTTGCCTACTATTATATCTAATCAAAACCGCTTTTATACGTGCACACTTTTTTTTTACAGCCAAAAAAAACCAAAACCAAAACCAAAACCAAACACTCAA	6.775	17.534
C4_03280W_A-T_682249_682323_75	C4_03280W_A	MSN5	Ca22chr4A_C_albicans_SC5314	+	ATC	682249-682323	IICFSNHNTHSEQKIVHRLILIVDI	ATCATTTGTTTTTCTAATCATAACACCCATTCGGAACAGAAGATCGTTCATCGTCTTATATTAATTGTTGACATA	0.478333	3.11933
C4_03280W_A-T_682413_682490_78	C4_03280W_A	MSN5	Ca22chr4A_C_albicans_SC5314	+	ATT	682413-682490	IVQSFIHLFLSSHFHLFVKYFVVSSG	ATTGTACAATCATTTATTCATTTGTTTTTATCTTCCCATTTCCACCTCTTTGTTAAATATTTTGTCGTTTCATCTGGA	4.31267	2.898
C4_03360C_A-T_706581_706742_162	C4_03360C_A	VTC4	Ca22chr4A_C_albicans_SC5314	-	ATC	706581-706742	IFLLSLNKLENKQSLPLYLIKSHNFFFAAVLVISSLSFIIPFPTFQFLNLPLFF	ATCTTCCTGCTTTCACTAAACAAGTTAGAAAACAAACAATCCCTACCCCTTTATCTCATCAAAAGTCATAATTTTTTTTTTGCTGCAGTTTTGGTCATATCCAGCCTCTCTTTTATCATCCCATTCCCAACATTCCAATTCCTCAACCTACCACTTTTTTTT	0.613	17.5743
C4_03360C_A-T_706727_706786_60	C4_03360C_A	VTC4	Ca22chr4A_C_albicans_SC5314	-	ATA	706727-706786	IITIFTLVVFNFVEESSCFH	ATAATTACCATTTTCACTCTTGTTGTTTTTAATTTTGTTGAAGAATCTTCCTGCTTTCAC	0.459333	7.62467
C4_03360C_A-T_706675_706767_93	C4_03360C_A	VTC4	Ca22chr4A_C_albicans_SC5314	-	TTG	706675-706767	LLFLILLKNLPAFTKQVRKQTIPTPLSHQKS	TTGTTGTTTTTAATTTTGTTGAAGAATCTTCCTGCTTTCACTAAACAAGTTAGAAAACAAACAATCCCTACCCCTTTATCTCATCAAAAGTCA	0.682	7.52
C4_03860C_A-T_820934_821008_75	C4_03860C_A	C4_03860C_A	Ca22chr4A_C_albicans_SC5314	-	TTG	820934-821008	LVRTTATLVLLMILIIILFIHHIFI	TTGGTGAGAACAACAGCAACACTAGTTTTACTGATGATTCTAATTATAATTTTATTTATCCATCATATTTTTATT	2.75933	72.6017
C4_04170C_A-T_893280_893435_156	C4_04170C_A	AXL2	Ca22chr4A_C_albicans_SC5314	-	ATT	893280-893435	ITYHCITNIFLSITISVNNCINNNNDITTTLIGYFTLSTSIFLSVFLDCCLS	ATTACATACCACTGCATCACCAACATCTTTCTTTCCATCACCATTAGTGTTAACAACTGTATCAACAACAACAACGACATTACCACCACCTTAATCGGTTATTTTACTTTATCAACATCGATATTCCTTTCCGTTTTTCTAGATTGTTGTTTATCC	6.55233	12.052
C4_04170C_A-T_893275_893379_105	C4_04170C_A	AXL2	Ca22chr4A_C_albicans_SC5314	-	CTG	893275-893379	LYQQQQRHYHHLNRLFYFINIDIPFRFSRLLFILN	CTGTATCAACAACAACAACGACATTACCACCACCTTAATCGGTTATTTTACTTTATCAACATCGATATTCCTTTCCGTTTTTCTAGATTGTTGTTTATCCTAAAT	9.735	16.0353
C4_04240C_A-T_907144_907209_66	C4_04240C_A	C4_04240C_A	Ca22chr4A_C_albicans_SC5314	-	AAG	907144-907209	KFGFSIKKYLQDLEKETENHSS	AAGTTTGGGTTTTCAATAAAAAAGTATTTGCAAGATTTAGAAAAAGAAACAGAGAACCATTCGTCT	4.76733	2.695
C4_04240C_A-T_907044_907166_123	C4_04240C_A	C4_04240C_A	Ca22chr4A_C_albicans_SC5314	-	AAG	907044-907166	KKQRTIRLRTLSFAFKLQLYNFIYRTLFHNLSSHPPSKEYF	AAGAAACAGAGAACCATTCGTCTTAGAACATTGTCATTCGCTTTTAAACTACAACTTTACAATTTTATTTACCGAACACTTTTCCATAATTTGAGTAGTCATCCTCCCTCAAAAGAATACTTT	5.486	3.951
C4_04320W_A-T_922870_922950_81	C4_04320W_A	FRE10	Ca22chr4A_C_albicans_SC5314	+	ATC	922870-922950	IPSVQALLPSYRRIFQPFPSFLLPSKK	ATCCCTTCAGTACAAGCCCTCCTTCCCAGTTACCGAAGAATTTTTCAGCCATTCCCATCCTTTCTTCTGCCAAGTAAAAAA	2.16367	2.47033
C4_04320W_A-T_922847_922993_147	C4_04320W_A	FRE10	Ca22chr4A_C_albicans_SC5314	+	ATT	922847-922993	IFIIIILKSLQYKPSFPVTEEFFSHSHPFFCQVKNRIIDCNIFLTRISN	ATTTTTATCATTATTATTTTAAAATCCCTTCAGTACAAGCCCTCCTTCCCAGTTACCGAAGAATTTTTCAGCCATTCCCATCCTTTCTTCTGCCAAGTAAAAAATAGAATAATAGATTGTAATATTTTCTTGACAAGAATTTCAAAC	1.75467	3.01033
C4_04480C_A-T_963648_963713_66	C4_04480C_A	EFB1	Ca22chr4A_C_albicans_SC5314	-	TTG	963648-963713	LKYHFTTPTHHKPIHNVILRFL	TTGAAGTATCATTTTACTACACCAACACATCACAAACCAATACATAATGTCATTCTCAGATTTCTC	135.049	216.747
C4_04480C_A-T_963587_963706_120	C4_04480C_A	EFB1	Ca22chr4A_C_albicans_SC5314	-	ATC	963587-963706	IILLHQHITNQYIMSFSDFSKVESIKSLNEFLADKSYIDG	ATCATTTTACTACACCAACACATCACAAACCAATACATAATGTCATTCTCAGATTTCTCTAAAGTCGAATCTATCAAGTCATTGAACGAATTCTTGGCTGACAAATCATACATTGATGGG	474.018	583.562
C4_04480C_A-T_963670_963762_93	C4_04480C_A	EFB1	Ca22chr4A_C_albicans_SC5314	-	ATT	963670-963762	IFLLFFPNFFLTSFPFFEVSFYYTNTSQTNT	ATTTTTCTTCTTTTTTTTCCAAATTTTTTTTTAACTTCCTTTCCTTTCTTTGAAGTATCATTTTACTACACCAACACATCACAAACCAATACA	29.8527	109.764
C4_04480C_B-T_963603_963722_120	C4_04480C_B	C4_04480C_B	Ca22chr4B_C_albicans_SC5314	-	ATC	963603-963722	IILLHQHITNQYIMSFSDFSKVESIKSLNEFLADKSYIDG	ATCATTTTACTACACCAACACATCACAAACCAATACATAATGTCATTCTCAGATTTCTCTAAAGTCGAATCTATCAAATCATTGAACGAATTCTTGGCTGACAAATCATACATTGATGGG	49.0547	49.8083
C4_04530C_A-T_972397_972498_102	C4_04530C_A	PHR1	Ca22chr4A_C_albicans_SC5314	-	ATT	972397-972498	IFNQPLFITYTLQLDTFVSTVYLSHRNSSTPHSY	ATTTTTAACCAACCCTTGTTTATCACTTATACACTCCAGTTAGATACCTTCGTTTCTACTGTTTACCTTTCTCATAGGAATTCATCGACGCCTCATTCATAC	10.4727	55.0037
C4_04530C_A-T_972313_972387_75	C4_04530C_A	PHR1	Ca22chr4A_C_albicans_SC5314	-	AGG	972313-972387	RCCNIKIISSLIQTSEINLVHWQYN	AGGTGTTGCAACATCAAAATCATTTCATCGCTAATACAAACATCCGAGATTAATCTTGTCCATTGGCAATATAAT	8.24833	122.868
C4_04530C_A-T_972357_972455_99	C4_04530C_A	PHR1	Ca22chr4A_C_albicans_SC5314	-	ATA	972357-972455	IPSFLLFTFLIGIHRRLIHTNIIGVATSKSFHR	ATACCTTCGTTTCTACTGTTTACCTTTCTCATAGGAATTCATCGACGCCTCATTCATACTAATATAATAGGTGTTGCAACATCAAAATCATTTCATCGC	3.61167	42.458
C4_04530C_A-T_972276_972335_60	C4_04530C_A	PHR1	Ca22chr4A_C_albicans_SC5314	-	ATC	972276-972335	ILSIGNIINTTANTYKSNQH	ATCTTGTCCATTGGCAATATAATTAACACCACTGCCAATACATATAAATCAAATCAGCAT	6.754	140.907
C4_04560C_A-T_977374_977445_72	C4_04560C_A	C4_04560C_A	Ca22chr4A_C_albicans_SC5314	-	AAG	977374-977445	KCEYLLTHIYLTLTFPINIHIFFF	AAGTGCGAATATTTACTGACACATATATATCTTACATTAACGTTTCCAATTAACATTCATATATTTTTTTTT	3.96067	0.985
C4_04560C_A-T_977430_977576_147	C4_04560C_A	C4_04560C_A	Ca22chr4A_C_albicans_SC5314	-	TTG	977430-977576	LSNNILLVCLFTETKIKHKGSTNFVNSSLISILSSLNSSAIIYRSANIY	TTGTCGAACAATATACTACTAGTGTGTCTATTTACAGAAACCAAGATTAAACACAAAGGATCCACTAATTTTGTGAACAGCTCCCTTATTTCCATACTTTCCAGTCTCAATTCATCAGCAATAATATATAGAAGTGCGAATATTTAC	1.69567	5.03267
C4_04730W_A-T_1012658_1012819_162	C4_04730W_A	BAS1	Ca22chr4A_C_albicans_SC5314	+	GTG	1012658-1012819	VEQDTWEMTCIYRNKKLNWYFNSFFFFCFSCFPKHDLGGVKPMRKIFFFVFQFF	GTGGAGCAGGACACATGGGAGATGACATGTATATACAGGAACAAAAAATTGAATTGGTATTTTAATTCTTTTTTTTTTTTTTGTTTTTCATGTTTCCCAAAACACGATTTAGGAGGAGTCAAGCCAATGAGGAAAATTTTTTTTTTTGTCTTTCAATTTTTT	0.953333	11.701
C4_04730W_A-T_1012919_1012984_66	C4_04730W_A	BAS1	Ca22chr4A_C_albicans_SC5314	+	AGG	1012919-1012984	RSKKYKEKTTCTIYSVYLYTYK	AGGAGCAAGAAGTATAAAGAAAAAACAACGTGTACTATCTATTCTGTGTATTTGTACACCTATAAA	4.71833	6.45667
C4_04800W_A-T_1033112_1033201_90	C4_04800W_A	C4_04800W_A	Ca22chr4A_C_albicans_SC5314	+	TTG	1033112-1033201	LLPSTNHYPYLIFNRFSCHFFNSSFINNHR	TTGTTGCCATCGACGAATCATTACCCCTATCTAATCTTTAATAGATTTAGTTGTCACTTTTTTAATTCTTCATTCATCAACAATCATCGA	2.417	8.92367
C4_05030C_A-T_1076669_1076776_108	C4_05030C_A	SSK2	Ca22chr4A_C_albicans_SC5314	-	CTG	1076669-1076776	LLTLLLLLLIFFFFCTLKKLFTTNNYQTQLKSSYTP	CTGTTAACTTTGTTATTGTTGTTGTTGATATTTTTTTTTTTTTGTACTTTAAAGAAACTCTTTACAACCAATAATTATCAAACCCAACTTAAATCATCATATACGCCT	1.17467	32.3013
C4_05030C_B-T_1076705_1076881_177	C4_05030C_B	C4_05030C_B	Ca22chr4B_C_albicans_SC5314	-	ATT	1076705-1076881	IPIHSFRYIFLSHEIYCKLKTLPPVNFVIVVVDIFFFCTLKKLFTTNNYQTQLKSSYTP	ATTCCTATTCACTCCTTTAGATATATATTTTTATCCCACGAAATTTATTGCAAATTGAAAACCCTTCCCCCCGTTAACTTTGTTATTGTTGTTGTTGATATTTTTTTTTTTTGTACTTTAAAGAAACTCTTTACAACCAATAATTATCAAACCCAACTTAAATCATCATACACGCCT	4.27133	0.0626667
C4_05050C_A-T_1078987_1079145_159	C4_05050C_A	PPG1	Ca22chr4A_C_albicans_SC5314	-	ATA	1078987-1079145	ILHILLQYSYKLLFSSALFSFFVCTAISFILPNLSGPPILLGTRLDYFIWLSR	ATACTCCACATATTATTACAGTACTCTTATAAACTTCTTTTTTCTTCAGCTCTCTTTTCTTTTTTTGTTTGTACTGCAATATCATTCATTCTTCCTAATCTGAGTGGACCACCAATATTATTAGGCACAAGGCTAGATTATTTCATTTGGCTTTCAAGA	0	2.19533
C4_05050C_A-T_1078831_1078959_129	C4_05050C_A	PPG1	Ca22chr4A_C_albicans_SC5314	-	GTG	1078831-1078959	VYLLPPIIHPTRIIYNDRPLPNPLLSKHVGTHLTKSIQRKYIQ	GTGTATCTCCTACCCCCCATAATACATCCCACCAGAATCATCTACAACGATCGCCCACTACCCAATCCATTGTTATCAAAGCACGTGGGTACACATTTAACAAAATCTATTCAAAGAAAATATATACAA	0.640667	2.196
C4_05050C_A-T_1079046_1079117_72	C4_05050C_A	PPG1	Ca22chr4A_C_albicans_SC5314	-	ATA	1079046-1079117	INFFFLQLSFLFLFVLQYHSFFLI	ATAAACTTCTTTTTTCTTCAGCTCTCTTTTCTTTTTTTGTTTGTACTGCAATATCATTCATTCTTCCTAATC	0	3.47167
C4_05050C_A-T_1078863_1078934_72	C4_05050C_A	PPG1	Ca22chr4A_C_albicans_SC5314	-	ATC	1078863-1078934	IPPESSTTIAHYPIHCYQSTWVHI	ATCCCACCAGAATCATCTACAACGATCGCCCACTACCCAATCCATTGTTATCAAAGCACGTGGGTACACATT	1.148	3.52333
C4_05150W_A-T_1114912_1115001_90	C4_05150W_A	VAC8	Ca22chr4A_C_albicans_SC5314	+	ATC	1114912-1115001	INFYPQRTKLTYFINPIPIPITITILLPII	ATCAACTTTTACCCCCAAAGAACAAAACTTACTTATTTTATTAATCCCATCCCCATCCCCATTACCATTACCATCCTATTACCAATCATT	23.0303	8.09467
C4_05150W_A-T_1114946_1115026_81	C4_05150W_A	VAC8	Ca22chr4A_C_albicans_SC5314	+	ATT	1114946-1115026	ILLIPSPSPLPLPSYYQSFEGLVSSLS	ATTTTATTAATCCCATCCCCATCCCCATTACCATTACCATCCTATTACCAATCATTTGAAGGATTAGTTAGTTCACTTTCT	26.0323	9.98167
C4_05210W_A-T_1128621_1128683_63	C4_05210W_A	C4_05210W_A	Ca22chr4A_C_albicans_SC5314	+	ATA	1128621-1128683	IHPCFQETTIPSPYLLFLFPP	ATACATCCTTGTTTCCAAGAAACTACTATTCCATCACCTTACCTTCTATTTTTGTTCCCACCA	4.262	5.65767
C4_05260W_A-T_1141783_1141977_195	C4_05260W_A	C4_05260W_A	Ca22chr4A_C_albicans_SC5314	+	TTG	1141783-1141977	LNLLITESWNWILPLIVKKLSNSLNYVVILKFLLKKILNNMKLLGFLEMGNYFVMKTMLLVVSHH	TTGAATTTGTTGATAACAGAGTCGTGGAATTGGATTCTACCCTTGATTGTAAAGAAATTGTCAAATTCCCTCAATTATGTCGTGATATTGAAGTTTCTTTTAAAGAAGATACTCAACAATATGAAGCTTTTGGGATTTCTCGAAATGGGAAATTATTTTGTAATGAAAACCATGTTGTTAGTGGTGTCACATCAT	18.9603	12.8593
C4_05260W_A-T_1142305_1142448_144	C4_05260W_A	C4_05260W_A	Ca22chr4A_C_albicans_SC5314	+	ATA	1142305-1142448	IFYMIMNRNYFSIMWKHLLIKYLKWNTWIYLFLVYMKKMQPLLNIEKQ	ATATTTTACATGATTATGAACCGGAATTATTTTTCAATAATGTGGAAACATTTATTAATCAAATATCTAAAGTGGAATACTTGGATTTATTTGTTTCTTGTTTACATGAAGAAGATGCAACCGTTACTAAATATAGAGAAACAA	5.67567	15.481
C4_05260W_A-T_1142452_1142553_102	C4_05260W_A	C4_05260W_A	Ca22chr4A_C_albicans_SC5314	+	ATG	1142452-1142553	MMLLLLLVVVLPKKKKSNVKVKLFNQHSGRNSIT	ATGATGCTGCTGCTGCTGCTGGTGGTGGTATTACCAAAGAAGAAGAAATCAAACGTGAAGGTGAAACTCTTCAACCAGCATTCAGGAAGAAATTCCATCACA	33.4653	38.7347
C4_05260W_A-T_1142557_1142616_60	C4_05260W_A	C4_05260W_A	Ca22chr4A_C_albicans_SC5314	+	AGG	1142557-1142616	RKKFSPISMIPKLIEFVKPY	AGGAAAAAGTTTTCACCAATTTCAATGATTCCAAAGTTAATCGAATTTGTGAAGCCATAT	1.37767	4.31467
C4_05260W_A-T_1142641_1142700_60	C4_05260W_A	C4_05260W_A	Ca22chr4A_C_albicans_SC5314	+	ATT	1142641-1142700	ILINIYKRFLLLMLVRNQQI	ATTTTGATAAATATTTACAAACGATTCTTACTGCTTATGCTTGTGAGAAACCAGCAAATT	9.86867	12.24
C4_05260W_A-T_1142845_1142916_72	C4_05260W_A	C4_05260W_A	Ca22chr4A_C_albicans_SC5314	+	TTG	1142845-1142916	LLNNHKWILKNIYHFYKICMYNQN	TTGCTCAACAATCACAAATGGATCCTAAAGAATATTTACCATTTTTACAAAATTTGCATGTACAACCAGAAT	8.82	5.963
C4_05260W_A-T_1141991_1142062_72	C4_05260W_A	C4_05260W_A	Ca22chr4A_C_albicans_SC5314	+	ATC	1141991-1142062	ISFIIHYRTIKIMFYSFKFKSRKL	ATCTCATTTATTATTCACTACCGTACAATCAAAATTATGTTTTATTCATTTAAATTCAAGTCAAGAAAATTA	2.43433	3.15367
C4_05260W_A-T_1142123_1142182_60	C4_05260W_A	C4_05260W_A	Ca22chr4A_C_albicans_SC5314	+	AAG	1142123-1142182	KRIYINQCNANEIFCSFGSP	AAGAGGATCTATATTAATCAATGTAATGCCAACGAAATATTCTGTAGTTTTGGAAGCCCC	42.401	10.4123
C4_05260W_A-T_1142876_1142938_63	C4_05260W_A	C4_05260W_A	Ca22chr4A_C_albicans_SC5314	+	ATA	1142876-1142938	IFTIFTKFACTTRIEKKIFNR	ATATTTACCATTTTTACAAAATTTGCATGTACAACCAGAATTGAAAAGAAAATTTTTAATCGA	8.95133	3.235
C4_05260W_B-T_1142345_1142461_117	C4_05260W_B	C4_05260W_B	Ca22chr4B_C_albicans_SC5314	+	ATA	1142345-1142461	IFYMIMIRNYFSIMWKHLLIKYLKWNTWIYLFLVYMKKM	ATATTTTACATGATTATGATCCGGAATTATTTTTCAATAATGTGGAAACATTTATTAATCAAATATCTAAAGTGGAATACTTGGATTTATTTGTTTCTTGTTTACATGAAGAAGATG	5.13467	1.20367
C4_05260W_B-T_1142492_1142656_165	C4_05260W_B	C4_05260W_B	Ca22chr4B_C_albicans_SC5314	+	ATG	1142492-1142656	MMLLLLLVVVLPKKKKSNVKVKLFNQHSGRNSITRRKKFSPISMIPKLIEFVKPY	ATGATGCTGCTGCTGCTGCTGGTGGTGGTATTACCAAAGAAAAAGAAATCAAACGTGAAGGTGAAACTCTTCAACCAGCATTCAGGAAGAAATTCCATCACAAGAAGGAAAAAGTTTTCACCAATTTCAATGATTCCAAAGTTAATCGAATTTGTGAAGCCATAT	6.004	5.39867
C4_05260W_B-T_1142681_1142740_60	C4_05260W_B	C4_05260W_B	Ca22chr4B_C_albicans_SC5314	+	ATT	1142681-1142740	ILINIYKRFLLLMLVRNQQT	ATTTTGATAAATATTTACAAACGATTCTTACTGCTTATGCTTGTGAGAAACCAGCAAACT	10.526	0.864667
C4_05690W_A-T_1251827_1251901_75	C4_05690W_A	SEC23	Ca22chr4A_C_albicans_SC5314	+	ATA	1251827-1251901	INIYNLVIIFHITIIRPNKFTNNIQ	ATAAATATTTACAATCTTGTAATCATTTTTCATATCACCATAATCCGACCAAACAAATTCACTAACAATATTCAA	7.79167	8.30767
C4_06340W_A-T_1406985_1407050_66	C4_06340W_A	AGO1	Ca22chr4A_C_albicans_SC5314	+	TTG	1406985-1407050	LYQSSDLRPRPVSHSPTTSLAI	TTGTATCAATCCTCCGACCTTCGACCTCGCCCCGTGTCCCACTCCCCTACCACGTCTCTGGCTATT	4.74767	108.153
C4_06420W_A-T_1425815_1426015_201	C4_06420W_A	C4_06420W_A	Ca22chr4A_C_albicans_SC5314	+	AGG	1425815-1426015	RFIDHFNIRFNQSILYPPILFHPWQHHRVPFFLTRTVKRINLLIVYSFLHISFFSFFLSAFIPSKFH	AGGTTTATCGACCATTTCAACATTCGCTTTAATCAATCTATATTATACCCACCTATCCTATTTCATCCTTGGCAACATCATCGTGTCCCCTTTTTTTTAACAAGAACTGTCAAAAGGATTAATCTATTAATAGTTTACAGTTTCCTACATATTTCTTTTTTTTCCTTCTTCTTGTCCGCCTTTATTCCTTCCAAATTTCAT	0	3.03867
C4_06420W_A-T_1425828_1425911_84	C4_06420W_A	C4_06420W_A	Ca22chr4A_C_albicans_SC5314	+	ATT	1425828-1425911	ISTFALINLYYTHLSYFILGNIIVSPFF	ATTTCAACATTCGCTTTAATCAATCTATATTATACCCACCTATCCTATTTCATCCTTGGCAACATCATCGTGTCCCCTTTTTTT	0	1.31733
C4_06420W_A-T_1425850_1425933_84	C4_06420W_A	C4_06420W_A	Ca22chr4A_C_albicans_SC5314	+	ATC	1425850-1425933	IYIIPTYPISSLATSSCPLFFNKNCQKD	ATCTATATTATACCCACCTATCCTATTTCATCCTTGGCAACATCATCGTGTCCCCTTTTTTTTAACAAGAACTGTCAAAAGGAT	0	1.626
C4_06420W_A-T_1425940_1426086_147	C4_06420W_A	C4_06420W_A	Ca22chr4A_C_albicans_SC5314	+	ATT	1425940-1426086	INSLQFPTYFFFFLLLVRLYSFQISLIFTYIYNSEEDRQEISLLYYNIH	ATTAATAGTTTACAGTTTCCTACATATTTCTTTTTTTTCCTTCTTCTTGTCCGCCTTTATTCCTTCCAAATTTCATTAATATTCACATACATATATAATAGTGAAGAAGACAGACAAGAAATTTCACTACTGTACTACAATATTCAT	0	3.42767
C4_06420W_A-T_1426213_1426278_66	C4_06420W_A	C4_06420W_A	Ca22chr4A_C_albicans_SC5314	+	ATT	1426213-1426278	ILHFLPIPIATLEFQSHHRRLY	ATTTTACACTTCCTTCCAATTCCAATTGCTACATTGGAATTCCAAAGCCATCATCGTCGTCTTTAT	0.835	2.815
C4_06420W_B-T_1426129_1426353_225	C4_06420W_B	C4_06420W_B	Ca22chr4B_C_albicans_SC5314	+	TTG	1426129-1426353	LLPKFVVLLLLSAFNSVFHFCFPICSIWDKLFFFFFFEQFYTSFQFQLLHWNSKAIIVVFIKLLAFKKLPSLLLL	TTGTTACCAAAATTTGTTGTATTATTATTATTGTCAGCTTTTAATTCTGTCTTCCATTTTTGTTTTCCGATTTGCTCGATTTGGGATAAGTTATTCTTTTTTTTTTTTTTTGAACAATTTTACACTTCCTTCCAATTCCAATTGCTACATTGGAATTCCAAAGCCATCATCGTCGTCTTTATTAAACTATTAGCTTTTAAAAAGCTTCCTTCATTACTACTACTT	1.39967	0.0163333
C4_06610C_A-T_1480251_1480319_69	C4_06610C_A	SDH12	Ca22chr4A_C_albicans_SC5314	-	ATC	1480251-1480319	IKNKFKSFQGWNQRKERQKKIDR	ATCAAGAACAAGTTTAAATCCTTTCAAGGCTGGAATCAAAGAAAGGAAAGACAGAAAAAGATAGATAGA	13.9573	91.6043
C4_06610C_A-T_1480131_1480241_111	C4_06610C_A	SDH12	Ca22chr4A_C_albicans_SC5314	-	AAG	1480131-1480241	KLNFISPPPIICIFQRFFLFSYLFILFLQFPLPLPPP	AAGCTTAATTTTATTTCACCACCTCCAATTATTTGCATATTTCAAAGGTTTTTTTTATTCTCCTATTTATTTATTTTGTTCCTACAATTCCCACTCCCACTTCCTCCCCCA	16.8247	62.423
C4_06690C_A-T_1494674_1494739_66	C4_06690C_A	C4_06690C_A	Ca22chr4A_C_albicans_SC5314	-	ATA	1494674-1494739	IMVCLTQSQVCNMYPEPYTNNY	ATAATGGTATGTCTAACCCAATCACAAGTTTGCAATATGTATCCAGAACCATATACTAACAATTAT	3.75733	7.59567
C4_06690C_A-T_1494684_1494764_81	C4_06690C_A	C4_06690C_A	Ca22chr4A_C_albicans_SC5314	-	ATC	1494684-1494764	IITQLLVIYNGMSNPITSLQYVSRTIY	ATCATAACACAATTGCTAGTCATCTATAATGGTATGTCTAACCCAATCACAAGTTTGCAATATGTATCCAGAACCATATAC	3.06133	7.104
C4_06690C_B-T_1494736_1494816_81	C4_06690C_B	C4_06690C_B	Ca22chr4B_C_albicans_SC5314	-	ATC	1494736-1494816	IITQVLVIYNGMSNPITSLQYISRTIY	ATCATAACACAAGTGCTAGTCATCTATAATGGTATGTCTAACCCAATCACAAGTTTGCAATATATATCCAGAACCATATAC	5.736	1.516
C4_06760W_A-T_1506853_1506966_114	C4_06760W_A	GUT2	Ca22chr4A_C_albicans_SC5314	+	TTG	1506853-1506966	LYFYPLETNIYIIYSKFIDNLIEKFIFHQSQVNYSRDN	TTGTATTTTTACCCATTAGAAACCAATATTTATATTATTTATTCTAAATTCATAGACAATTTGATAGAGAAATTTATTTTTCACCAATCACAGGTAAACTATTCCAGAGATAAC	11.9423	5.31333
C4_06760W_A-T_1506953_1507024_72	C4_06760W_A	GUT2	Ca22chr4A_C_albicans_SC5314	+	ATT	1506953-1507024	IPEITRLEFIDRVHTYYYNLPPHF	ATTCCAGAGATAACTAGATTAGAGTTCATTGATAGAGTCCACACATATTATTATAATCTCCCCCCACACTTT	21.655	10.773
C4_06760W_A-T_1506900_1506962_63	C4_06760W_A	GUT2	Ca22chr4A_C_albicans_SC5314	+	ATT	1506900-1506962	IHRQFDREIYFSPITGKLFQR	ATTCATAGACAATTTGATAGAGAAATTTATTTTTCACCAATCACAGGTAAACTATTCCAGAGA	18.6603	7.73233
C4_06760W_B-T_1507006_1507077_72	C4_06760W_B	C4_06760W_B	Ca22chr4B_C_albicans_SC5314	+	ATT	1507006-1507077	IPEITRLEFIDRVHTYYYNLPPHY	ATTCCAGAGATAACTAGATTAGAGTTCATTGATAGAGTCCACACATATTATTATAATCTCCCCCCACACTAT	15.3677	2.103
C4_06760W_B-T_1507034_1507138_105	C4_06760W_B	C4_06760W_B	Ca22chr4B_C_albicans_SC5314	+	TTG	1507034-1507138	LIESTHIIIISPHTIESSSRYLADCITFFSFSTYS	TTGATAGAGTCCACACATATTATTATAATCTCCCCCCACACTATTGAAAGTTCTTCCAGATATCTTGCTGATTGTATAACATTTTTTTCATTTTCTACATATTCC	10.538	2.21867
C4_06820C_A-T_1520370_1520474_105	C4_06820C_A	CZF1	Ca22chr4A_C_albicans_SC5314	-	AGG	1520370-1520474	RERKQKKNNKNHPTVLILITKHIPAINWSDFFLLL	AGGGAAAGGAAACAGAAGAAGAATAATAAGAACCACCCAACAGTGTTAATCTTGATTACAAAACATATACCAGCTATCAACTGGTCGGATTTTTTCTTATTACTA	0.866333	2.22833
C4_06820C_A-T_1521215_1521427_213	C4_06820C_A	CZF1	Ca22chr4A_C_albicans_SC5314	-	ATT	1521215-1521427	ITDRVILQAHIYIFNNFEEPKYTLTYHYIFGEHCHTISVSPIKSTNRIFKYILFPPLKKKKNLVAIIKKTC	ATTACAGACCGTGTCATTCTTCAAGCCCACATTTATATATTTAACAACTTTGAAGAGCCAAAATATACTTTAACCTATCATTATATATTTGGAGAACATTGTCACACAATTTCAGTATCCCCAATTAAAAGTACTAATCGCATTTTCAAGTATATTCTTTTTCCTCCTTTGAAGAAGAAAAAAAATCTTGTTGCCATAATTAAAAAGACTTGT	0	2.17233
C4_06820C_A-T_1521358_1521609_252	C4_06820C_A	CZF1	Ca22chr4A_C_albicans_SC5314	-	ATC	1521358-1521609	ILQFIKILVQAPYIRVLFFSFLHIKNQVRNTNYNTPENKVREVKIKYIKKKRQRKRKLKFTLQTVSFFKPTFIYLTTLKSQNIL	ATCCTTCAATTTATAAAGATATTAGTTCAAGCTCCTTACATTCGCGTACTGTTTTTTTCTTTTTTGCACATTAAAAACCAAGTACGTAATACCAATTACAACACCCCTGAAAACAAAGTAAGAGAGGTTAAAATTAAATATATAAAAAAGAAAAGACAAAGGAAAAGGAAACTTAAGTTTACATTACAGACCGTGTCATTCTTCAAGCCCACATTTATATATTTAACAACTTTGAAGAGCCAAAATATACTT	0	2.10067
C4_06860C_A-T_1532234_1532293_60	C4_06860C_A	C4_06860C_A	Ca22chr4A_C_albicans_SC5314	-	ATT	1532234-1532293	IVLIRNSGMLIDCQSRRGSD	ATTGTCCTTATTCGAAATTCAGGTATGTTGATAGATTGCCAATCACGACGAGGAAGTGAC	5.42067	10.1683
C4_06860C_A-T_1532045_1532164_120	C4_06860C_A	C4_06860C_A	Ca22chr4A_C_albicans_SC5314	-	CTG	1532045-1532164	LVPMSKTHHMGRVSVLNEQQSLKQWYVFDFFELSIEFLLT	CTGGTGCCAATGTCGAAAACGCATCATATGGGGCGGGTGTCTGTGCTGAACGAACAGCAATCGTTAAAGCAGTGGTATGTGTTTGATTTTTTTGAATTATCAATTGAGTTCTTACTAACT	2.69667	11.961
C4_06860C_A-T_1532266_1532457_192	C4_06860C_A	C4_06860C_A	Ca22chr4A_C_albicans_SC5314	-	ATG	1532266-1532457	MSIPKYTDHKELTDAEFTNLKENVIKGMFSRECNYSFQVWVFFLLTIHYSQIRRLLSLFEIQVC	ATGTCGATTCCAAAGTATACTGATCATAAAGAGTTAACAGACGCAGAATTTACCAATTTAAAAGAAAATGTTATCAAAGGTATGTTTAGCAGGGAATGCAATTATTCTTTTCAAGTTTGGGTTTTTTTTTTGCTAACAATTCATTATAGCCAAATCCGCCGCTTATTGTCCTTATTCGAAATTCAGGTATGT	1.29167	6.44133
C4_06860C_A-T_1532119_1532259_141	C4_06860C_A	C4_06860C_A	Ca22chr4A_C_albicans_SC5314	-	ATT	1532119-1532259	IANHDEEVTNFFSFNFLQSGMYPFNGIGRVYIWCQCRKRIIWGGCLC	ATTGCCAATCACGACGAGGAAGTGACTAACTTTTTTTCTTTTAATTTTTTACAGAGTGGGATGTACCCTTTTAACGGAATCGGGCGAGTTTATATCTGGTGCCAATGTCGAAAACGCATCATATGGGGCGGGTGTCTGTGC	8.47167	7.64333
C4_06860C_A-T_1532424_1532498_75	C4_06860C_A	C4_06860C_A	Ca22chr4A_C_albicans_SC5314	-	CTG	1532424-1532498	LLYLFHHFLLNYTLCRFQSILIIKS	CTGTTGTACCTTTTCCACCACTTTCTTCTTAATTATACACTATGTCGATTCCAAAGTATACTGATCATAAAGAGT	0.367333	14.237
C4_06860C_A-T_1532238_1532315_78	C4_06860C_A	C4_06860C_A	Ca22chr4A_C_albicans_SC5314	-	ATT	1532238-1532315	IIAKSAAYCPYSKFRYVDRLPITTRK	ATTATAGCCAAATCCGCCGCTTATTGTCCTTATTCGAAATTCAGGTATGTTGATAGATTGCCAATCACGACGAGGAAG	4.16967	7.822
C4_06860C_A-T_1532082_1532216_135	C4_06860C_A	C4_06860C_A	Ca22chr4A_C_albicans_SC5314	-	ATT	1532082-1532216	IFYRVGCTLLTESGEFISGANVENASYGAGVCAERTAIVKAVVCV	ATTTTTTACAGAGTGGGATGTACCCTTTTAACGGAATCGGGCGAGTTTATATCTGGTGCCAATGTCGAAAACGCATCATATGGGGCGGGTGTCTGTGCTGAACGAACAGCAATCGTTAAAGCAGTGGTATGTGTT	6.439	11.8357
C4_07190W_A-T_1585925_1586038_114	C4_07190W_A	SEC10	Ca22chr4A_C_albicans_SC5314	+	TTG	1585925-1586038	LYSILMYFFINLFPKTSVEFWWLRTTYFFFVQQNVNKF	TTGTATAGTATTCTAATGTATTTTTTTATAAACCTTTTCCCAAAAACGAGTGTAGAATTTTGGTGGTTGCGCACGACATATTTTTTTTTTGTCCAACAAAACGTAAACAAGTTT	6.669	26.4777
C4_07220C_A-T_1594117_1594218_102	C4_07220C_A	C4_07220C_A	Ca22chr4A_C_albicans_SC5314	-	ATT	1594117-1594218	IDSNATSTFGAHSSTTRLAVSPDPAASGRALSQR	ATTGACAGTAACGCCACTAGCACATTTGGTGCCCACTCAAGCACTACACGCCTTGCTGTGTCCCCTGACCCTGCCGCAAGTGGAAGAGCCTTATCCCAGAGG	0	3.55533
C4_07220C_A-T_1593901_1594002_102	C4_07220C_A	C4_07220C_A	Ca22chr4A_C_albicans_SC5314	-	ATC	1593901-1594002	IVYPIERDRKATTCQEHCSLLHQGDNCPAPKTIR	ATCGTCTATCCCATTGAACGAGACAGAAAGGCAACTACTTGCCAAGAACACTGTTCCCTACTGCACCAAGGTGACAACTGTCCAGCCCCCAAGACTATCCGT	10.8493	22.228
C4_07220C_A-T_1593840_1594217_378	C4_07220C_A	C4_07220C_A	Ca22chr4A_C_albicans_SC5314	-	TTG	1593840-1594217	LTVTPLAHLVPTQALHALLCPLTLPQVEEPYPRGKTIDVADEEVMKLLGKELLEYDVDMPIFFKEYFKTGGTSSIPLNETERQLLAKNTVPYCTKVTTVQPPRLSVRKKYNATEMDQPQLRKEV	TTGACAGTAACGCCACTAGCACATTTGGTGCCCACTCAAGCACTACACGCCTTGCTGTGTCCCCTGACCCTGCCGCAAGTGGAAGAGCCTTATCCCAGAGGTAAAACAATAGATGTTGCCGACGAGGAGGTAATGAAATTATTGGGAAAGGAGTTGCTAGAGTATGACGTGGACATGCCAATCTTTTTCAAAGAGTATTTCAAAACCGGCGGCACATCGTCTATCCCATTGAACGAGACAGAAAGGCAACTACTTGCCAAGAACACTGTTCCCTACTGCACCAAGGTGACAACTGTCCAGCCCCCAAGACTATCCGTTAGAAAGAAATACAACGCCACCGAAATGGACCCKCKKCAACCGCAACTACGAAAAGAAGTT	3.43033	7.949
C4_07220C_A-T_1593759_1593830_72	C4_07220C_A	C4_07220C_A	Ca22chr4A_C_albicans_SC5314	-	ATT	1593759-1593830	IEGTKCQTANRTHATHHQKTRQTI	ATTGAAGGAACTAAATGTCAAACGGCAAACAGAACACACGCAACCCACCACCAGAAAACTCGTCAAACTATC	0	4.43567
C4_07220C_A-T_1593989_1594054_66	C4_07220C_A	C4_07220C_A	Ca22chr4A_C_albicans_SC5314	-	ATG	1593989-1594054	MTWTCQSFSKSISKPAAHRLSH	ATGACGTGGACATGCCAATCTTTTTCAAAGAGTATTTCAAAACCGGCGGCACATCGTCTATCCCAT	10.627	10.431
C4_07220C_B-T_1593809_1593880_72	C4_07220C_B	C4_07220C_B	Ca22chr4B_C_albicans_SC5314	-	ATT	1593809-1593880	IEGTKCQTTDRTHATDHQKTRQTF	ATTGAAGGAACTAAATGTCAAACGACAGACAGAACACACGCAACCGACCACCAGAAAACTCGTCAAACTTTC	0	8.20933
C5_00180W_A-T_20296_20385_90	C5_00180W_A	AFL1	Ca22chr5A_C_albicans_SC5314	+	ATA	20296-20385	ISPNQLVNHYRHCLPLLQSPKRQWRLLHQC	ATATCCCCAAATCAATTAGTCAACCATTATCGCCATTGTCTACCCCTACTCCAATCACCGAAAAGGCAATGGCGTCTATTGCACCAATGT	41.746	36.03
C5_00180W_A-T_20494_20787_294	C5_00180W_A	AFL1	Ca22chr5A_C_albicans_SC5314	+	CTG	20494-20787	LQKTYQTSNLIPTHLSMGQESVVPSQTHQTPQESLMQKYRNYQRSGLSVFVPWMPRHFQNLADVFSIDSLKRGSLKLLFLVTKLYSMKLLKTGPLVTF	CTGCAGAAAACTTATCAAACATCAAATCTTATTCCAACTCATTTGTCGATGGGGCAAGAATCAGTCGTACCGTCTCAAACACATCAAACGCCTCAAGAAAGTCTCATGCAGAAGTATCGAAACTACCAAAGATCGGGACTATCGGTGTTTGTGCCATGGATGCCAAGGCACTTTCAAAACCTTGCAGACGTATTCTCAATCGACTCATTGAAACGGGGGAGTTTGAAACTGTTATTTTTGGTGACAAAGTTATACTCGATGAAGCTATTGAAAACTGGCCCACTTGTGACTTTT	73.0307	52.284
C5_00180W_A-T_20866_21006_141	C5_00180W_A	AFL1	Ca22chr5A_C_albicans_SC5314	+	ATG	20866-21006	MTWCSKKHSGIEEWFCLSSTTPMFHHQKDWKLAETAGLIWIRSYWKD	ATGACTTGGTGTTCCAAAAAGCACTCTGGGATAGAAGAGTGGTTTTGTCTATCCTCAACCACGCCAATGTTCCATCACCAGAAAGATTGGAAATTAGCAGAGACGGCGGGCCTCATTTGGATTCGCAGTTATTGGAAAGAT	21.8783	15.493
C5_00180W_A-T_21058_21252_195	C5_00180W_A	AFL1	Ca22chr5A_C_albicans_SC5314	+	ATG	21058-21252	MNLTGRWSTKIHFGLETIHFPNRLLKNPLTEKIIMCTFTTQKLLAVVDEDCFVKLETSRLSLMPT	ATGAACCTGACTGGGAGATGGTCGACGAAGATACACTTCGGGTTGGAGACAATACACTTTCCAAACCGTTTGTTGAAAAACCCGTTGACGGAGAAGATCATAATGTGTACATTTACTACCCAAAAGCTACTGGCGGTGGTGGACGAAGATTGTTTCGTAAAATTGGAAACAAGTCGTCTGAGTTTGATGCCAACT	54.3403	93.5557
C5_00180W_A-T_20321_20467_147	C5_00180W_A	AFL1	Ca22chr5A_C_albicans_SC5314	+	ATT	20321-20467	IIAIVYPYSNHRKGNGVYCTNVRKFFPQNTCRRFCLQIKLYFIFCRASQ	ATTATCGCCATTGTCTACCCCTACTCCAATCACCGAAAAGGCAATGGCGTCTATTGCACCAATGTTAGAAAGTTTTTCCCCCAAAACACATGCAGAAGATTCTGTCTCCAGATTAAACTCTATTTCATCTTCTGCAGGGCAAGTCAG	34.236	26.458
C5_00180W_A-T_20507_20701_195	C5_00180W_A	AFL1	Ca22chr5A_C_albicans_SC5314	+	ATC	20507-20701	IKHQILFQLICRWGKNQSYRLKHIKRLKKVSCRSIETTKDRDYRCLCHGCQGTFKTLQTYSQSTH	ATCAAACATCAAATCTTATTCCAACTCATTTGTCGATGGGGCAAGAATCAGTCGTACCGTCTCAAACACATCAAACGCCTCAAGAAAGTCTCATGCAGAAGTATCGAAACTACCAAAGATCGGGACTATCGGTGTTTGTGCCATGGATGCCAAGGCACTTTCAAAACCTTGCAGACGTATTCTCAATCGACTCAT	96.413	69.7033
C5_00180W_A-T_20900_20959_60	C5_00180W_A	AFL1	Ca22chr5A_C_albicans_SC5314	+	AAG	20900-20959	KSGFVYPQPRQCSITRKIGN	AAGAGTGGTTTTGTCTATCCTCAACCACGCCAATGTTCCATCACCAGAAAGATTGGAAAT	9.81467	15.6287
C5_00180W_A-T_21068_21130_63	C5_00180W_A	AFL1	Ca22chr5A_C_albicans_SC5314	+	CTG	21068-21130	LGDGRRRYTSGWRQYTFQTVC	CTGGGAGATGGTCGACGAAGATACACTTCGGGTTGGAGACAATACACTTTCCAAACCGTTTGT	97.668	181.327
C5_00380W_A-T_68271_68333_63	C5_00380W_A	C5_00380W_A	Ca22chr5A_C_albicans_SC5314	+	GTG	68271-68333	VYFPPLLVFPSRFLVTLSLWQ	GTGTACTTTCCTCCCCTCCTTGTTTTTCCATCACGCTTTCTTGTAACTTTAAGTCTATGGCAA	65.953	143.304
C5_00380W_A-T_68264_68338_75	C5_00380W_A	C5_00380W_A	Ca22chr5A_C_albicans_SC5314	+	ATG	68264-68338	MKCVLSSPPCFSITLSCNFKSMAIK	ATGAAATGTGTACTTTCCTCCCCTCCTTGTTTTTCCATCACGCTTTCTTGTAACTTTAAGTCTATGGCAATAAAA	77.3813	152.689
C5_00390C_A-T_72250_72312_63	C5_00390C_A	C5_00390C_A	Ca22chr5A_C_albicans_SC5314	-	ATA	72250-72312	ILFLVVVVVIIVSPYIGQYTP	ATACTTTTCCTTGTTGTTGTTGTTGTTATTATTGTTTCTCCATATATCGGTCAATACACACCC	0.569667	14.4007
C5_00390C_A-T_72219_72302_84	C5_00390C_A	C5_00390C_A	Ca22chr5A_C_albicans_SC5314	-	TTG	72219-72302	LLLLLLLLFLHISVNTHPDLPSNKPIRN	TTGTTGTTGTTGTTGTTATTATTGTTTCTCCATATATCGGTCAATACACACCCTGACCTTCCCTCAAATAAACCAATCAGAAAC	0.427	20.0867
C5_00390C_A-T_72209_72319_111	C5_00390C_A	C5_00390C_A	Ca22chr5A_C_albicans_SC5314	-	ATT	72209-72319	IINTFPCCCCCYYCFSIYRSIHTLTFPQINQSETDNS	ATTATCAATACTTTTCCTTGTTGTTGTTGTTGTTATTATTGTTTCTCCATATATCGGTCAATACACACCCTGACCTTCCCTCAAATAAACCAATCAGAAACTGACAACAGT	0.323333	15.6347
C5_00390C_A-T_72146_72205_60	C5_00390C_A	C5_00390C_A	Ca22chr5A_C_albicans_SC5314	-	ATA	72146-72205	INWFVSTTRISFLALPQTQT	ATAAATTGGTTTGTTTCGACCACGCGCATTTCCTTTCTCGCCTTACCCCAGACTCAGACT	0.459333	8.551
C5_00490C_A-T_93600_93674_75	C5_00490C_A	BUD2	Ca22chr5A_C_albicans_SC5314	-	CTG	93600-93674	LCTVIHIFKLKLSVLLLLIKIIYHP	CTGTGTACGGTTATCCACATTTTTAAATTAAAACTATCTGTATTATTATTACTTATAAAGATAATCTATCATCCC	4.78367	4.265
C5_00490C_A-T_93647_93733_87	C5_00490C_A	BUD2	Ca22chr5A_C_albicans_SC5314	-	AAG	93647-93733	KFDLLFCFVYTPKKINPHLDCVRLSTFLN	AAGTTTGATTTGTTGTTTTGTTTTGTTTATACCCCAAAAAAAATTAATCCCCATTTAGACTGTGTACGGTTATCCACATTTTTAAAT	5.70733	4.35833
C5_00500W_A-T_94769_94963_195	C5_00500W_A	NAM7	Ca22chr5A_C_albicans_SC5314	+	TTG	94769-94963	LIISFKCIDLNYKNHLNQIHLTSPYLHPIISVFSRKKISTTIIIIKARAKQAVSNKFDQSNLKPA	TTGATTATTTCATTCAAATGTATTGATTTAAATTATAAAAATCATTTAAACCAAATACACCTAACTTCCCCTTACCTTCATCCAATAATATCAGTATTCTCTAGAAAGAAGATATCAACAACAATAATAATAATAAAAGCAAGGGCAAAGCAAGCCGTATCCAATAAATTTGATCAATCAAACCTCAAACCAGCT	21.7743	4.782
C5_00500W_A-T_94905_94985_81	C5_00500W_A	NAM7	Ca22chr5A_C_albicans_SC5314	+	AAG	94905-94985	KQGQSKPYPINLINQTSNQLKRDTIKI	AAGCAAGGGCAAAGCAAGCCGTATCCAATAAATTTGATCAATCAAACCTCAAACCAGCTTAAACGAGACACTATCAAGATC	30.0273	16.888
C5_00550C_A-T_121860_121922_63	C5_00550C_A	C5_00550C_A	Ca22chr5A_C_albicans_SC5314	-	CTG	121860-121922	LTITKACPFYYFERLCDSLTH	CTGACAATCACCAAAGCTTGTCCATTTTATTATTTTGAACGACTCTGCGACAGCTTAACACAT	2.75633	3.278
C5_00670C_A-T_153803_153997_195	C5_00670C_A	HMS1	Ca22chr5A_C_albicans_SC5314	-	ATA	153803-153997	IYKTAINTHFFRFPPYLILSPTEKATIIDTPSTSTYFYTSLYRITECGFFFLIIELSKAYLIGIN	ATATATAAAACAGCTATAAACACTCACTTTTTCCGATTCCCACCCTATTTGATTCTCAGCCCCACTGAAAAAGCAACAATTATAGATACACCATCCACTTCAACTTACTTTTACACTTCCTTATATCGGATAACAGAGTGTGGTTTTTTTTTCTTGATTATTGAATTATCAAAAGCTTATTTAATTGGCATTAAC	1.95067	4.87767
C5_00670C_A-T_153640_153756_117	C5_00670C_A	HMS1	Ca22chr5A_C_albicans_SC5314	-	ATA	153640-153756	IYYSVSFFFFQTIVDSTLGDSKKGIKRNRLERYFARLFT	ATATACTACTCAGTTTCTTTTTTTTTTTTTCAAACTATAGTTGATTCAACCCTAGGAGACTCCAAAAAAGGAATTAAAAGAAACCGTTTGGAAAGGTATTTTGCTAGATTATTCACT	5.181	13.795
C5_00670C_A-T_153235_153393_159	C5_00670C_A	HMS1	Ca22chr5A_C_albicans_SC5314	-	ACG	153235-153393	TSVHIFVLQDLSNHFHYQLQIHIKWSSFQTIYYLSYSLGYIKKLFITIPSLKE	ACGTCGGTACATATTTTTGTATTGCAAGATCTTTCAAATCATTTTCATTATCAACTACAGATACATATCAAGTGGTCTTCTTTTCAAACAATTTATTATTTATCCTATAGTTTGGGTTATATCAAGAAATTGTTTATCACTATCCCCTCCCTAAAAGAA	2.04533	3.36333
C5_00700C_A-T_160794_160928_135	C5_00700C_A	SPE2	Ca22chr5A_C_albicans_SC5314	-	ATC	160794-160928	INLYKLLFFNYLNNYPNFQSRVFLCQTLCYETNFNNYNNNNSKNN	ATCAATCTTTACAAGTTATTGTTTTTTAACTACTTAAATAACTATCCCAATTTCCAATCAAGAGTGTTTTTATGTCAGACCCTCTGCTACGAAACCAATTTCAACAATTACAACAACAACAACAGCAAAAACAAC	43.2587	11.458
C5_00700C_A-T_160946_161077_132	C5_00700C_A	SPE2	Ca22chr5A_C_albicans_SC5314	-	AAG	160946-161077	KDPNNYNYKYLTLFLTKLLVEFFFNTHIHILIFFFCIDRLKSFQ	AAGGATCCCAACAACTACAACTACAAATATCTTACATTATTCCTTACTAAGTTACTTGTTGAATTCTTCTTTAACACACATATACATATTCTAATCTTTTTTTTTTGTATTGACCGCTTGAAATCTTTTCAG	5.10133	2.49467
C5_00700C_A-T_160771_160872_102	C5_00700C_A	SPE2	Ca22chr5A_C_albicans_SC5314	-	ATC	160771-160872	IKSVFMSDPLLRNQFQQLQQQQQQKQLGYNTKVT	ATCAAGAGTGTTTTTATGTCAGACCCTCTGCTACGAAACCAATTTCAACAATTACAACAACAACAACAGCAAAAACAACTAGGATACAACACCAAAGTTACC	70.061	17.2407
C5_00790C_A-T_188766_188858_93	C5_00790C_A	C5_00790C_A	Ca22chr5A_C_albicans_SC5314	-	ATA	188766-188858	ITNNNSIINTNSSNKTTFKFKKERNNKKKGK	ATAACTAACAACAACTCAATCATCAATACTAATTCATCAAATAAAACTACTTTCAAGTTTAAGAAAGAAAGAAATAACAAGAAGAAGGGTAAA	2.93133	3.13667
C5_00790C_A-T_188436_188558_123	C5_00790C_A	C5_00790C_A	Ca22chr5A_C_albicans_SC5314	-	TTG	188436-188558	LFVSIFVFLRFFFPIPQKSKRKKERKLPTSKLVVPSSNPNY	TTGTTTGTTAGTATTTTTGTGTTTTTACGTTTTTTTTTTCCCATCCCCCAAAAGAGTAAAAGGAAGAAAGAAAGAAAGTTACCAACCAGTAAATTGGTAGTTCCATCGTCAAATCCAAACTAC	4.86333	6.41733
C5_00790C_A-T_188753_188833_81	C5_00790C_A	C5_00790C_A	Ca22chr5A_C_albicans_SC5314	-	ATA	188753-188833	ILIHQIKLLSSLRKKEITRRRVNKKTD	ATACTAATTCATCAAATAAAACTACTTTCAAGTTTAAGAAAGAAAGAAATAACAAGAAGAAGGGTAAATAAAAAGACAGAT	2.037	3.46433
C5_00790C_A-T_188462_188581_120	C5_00790C_A	C5_00790C_A	Ca22chr5A_C_albicans_SC5314	-	CTG	188462-188581	LYLYITKVCLLVFLCFYVFFFPSPKRVKGRKKESYQPVNW	CTGTATCTATATATAACTAAAGTTTGTTTGTTAGTATTTTTGTGTTTTTACGTTTTTTTTTTCCCATCCCCCAAAAGAGTAAAAGGAAGAAAGAAAGAAAGTTACCAACCAGTAAATTGG	4.387	6.022
C5_00790C_A-T_188369_188446_78	C5_00790C_A	C5_00790C_A	Ca22chr5A_C_albicans_SC5314	-	ATC	188369-188446	IQTTSIVKPTHHKFRKLTTRVANTNE	ATCCAAACTACTAGTATTGTAAAACCAACTCATCACAAGTTCAGGAAATTAACTACAAGAGTAGCAAACACCAACGAG	3.22	5.403
C5_00790C_A-T_188290_188373_84	C5_00790C_A	C5_00790C_A	Ca22chr5A_C_albicans_SC5314	-	ACG	188290-188373	TSNPKIEFCALIIVILYFFFHYHYCLEY	ACGAGTAATCCAAAAATTGAATTCTGTGCCTTAATTATTGTTATTCTATATTTTTTTTTTCATTACCACTATTGTCTAGAATAT	0.881	1.77067
C5_01050C_A-T_224394_224558_165	C5_01050C_A	C5_01050C_A	Ca22chr5A_C_albicans_SC5314	-	ATA	224394-224558	IFQPYLSSNVWINNEIIRCKIGHTTNKIFPLFKEAYVPTTHNYQHIHSQVLTCRL	ATATTTCAACCATACCTGTCAAGCAATGTTTGGATTAATAACGAGATCATTAGGTGTAAAATCGGTCATACAACCAATAAGATCTTTCCATTATTTAAGGAAGCGTATGTACCAACAACTCACAACTACCAGCATATTCATTCTCAAGTACTAACATGTCGACTC	25.9903	19.137
C5_01050C_A-T_224408_224563_156	C5_01050C_A	C5_01050C_A	Ca22chr5A_C_albicans_SC5314	-	AAG	224408-224563	KPYFNHTCQAMFGLITRSLGVKSVIQPIRSFHYLRKRMYQQLTTTSIFILKY	AAGCCATATTTCAACCATACCTGTCAAGCAATGTTTGGATTAATAACGAGATCATTAGGTGTAAAATCGGTCATACAACCAATAAGATCTTTCCATTATTTAAGGAAGCGTATGTACCAACAACTCACAACTACCAGCATATTCATTCTCAAGTAC	27.6663	20.241
C5_01080C_A-T_231728_231883_156	C5_01080C_A	GDS1	Ca22chr5A_C_albicans_SC5314	-	ATA	231728-231883	ISHIIRYIHFHLHFINLKPIIPLPSSLPPDIIYFIVLFISFHIYIYTWLSIL	ATATCACACATTATTAGATATATTCATTTTCACCTTCATTTCATCAACCTCAAACCCATCATCCCACTACCTTCCTCCCTCCCTCCGGACATAATATATTTCATTGTACTATTTATTTCATTTCATATATACATCTACACTTGGTTATCTATTTTA	5.377	9.462
C5_01080C_A-T_231116_231199_84	C5_01080C_A	GDS1	Ca22chr5A_C_albicans_SC5314	-	TTG	231116-231199	LTLNNLQITKKNNERESKGKVYRTLPLF	TTGACATTAAATAATCTACAAATAACAAAAAAAAACAACGAAAGAGAAAGTAAAGGAAAAGTATATCGAACTTTGCCCCTCTTC	0.854333	3.39067
C5_01080C_A-T_231793_231900_108	C5_01080C_A	GDS1	Ca22chr5A_C_albicans_SC5314	-	ATT	231793-231900	IWFNFLYHTLLDIFIFTFISSTSNPSSHYLPPSLRT	ATTTGGTTTAATTTTTTATATCACACATTATTAGATATATTCATTTTCACCTTCATTTCATCAACCTCAAACCCATCATCCCACTACCTTCCTCCCTCCCTCCGGACA	7.10233	13.2897
C5_01080C_A-T_231687_231866_180	C5_01080C_A	GDS1	Ca22chr5A_C_albicans_SC5314	-	ATA	231687-231866	IYSFSPSFHQPQTHHPTTFLPPSGHNIFHCTIYFISYIHLHLVIYFIRVKLDWLIVHLLH	ATATATTCATTTTCACCTTCATTTCATCAACCTCAAACCCATCATCCCACTACCTTCCTCCCTCCCTCCGGACATAATATATTTCATTGTACTATTTATTTCATTTCATATATACATCTACACTTGGTTATCTATTTTATAAGGGTGAAATTAGACTGGTTAATTGTACATTTACTTCAT	4.66	8.42667
C5_01100C_A-T_246345_246455_111	C5_01100C_A	CLN3	Ca22chr5A_C_albicans_SC5314	-	TTG	246345-246455	LDTSILFSISFLLLSISFYLGGIIDPFLLILWEYSFT	TTGGACACTTCCATCCTCTTTTCTATTTCTTTCCTTCTTCTTTCCATATCATTTTACCTTGGAGGTATTATTGATCCTTTCCTGCTAATACTTTGGGAGTACTCTTTCACC	4.56033	20.057
C5_01100C_A-T_245817_245900_84	C5_01100C_A	CLN3	Ca22chr5A_C_albicans_SC5314	-	ATT	245817-245900	IFHLVICFSISAACLFVKNYSKTILITI	ATTTTCCATCTGGTTATTTGCTTTTCCATTTCTGCTGCTTGTTTATTTGTTAAGAATTATTCCAAAACTATTCTTATCACCATT	0	2.023
C5_01100C_A-T_246371_246469_99	C5_01100C_A	CLN3	Ca22chr5A_C_albicans_SC5314	-	TTG	246371-246469	LVSVIWTLPSSFLFLSFFFPYHFTLEVLLILSC	TTGGTTTCAGTTATTTGGACACTTCCATCCTCTTTTCTATTTCTTTCCTTCTTCTTTCCATATCATTTTACCTTGGAGGTATTATTGATCCTTTCCTGC	2.33033	4.23167
C5_01100C_A-T_245851_245916_66	C5_01100C_A	CLN3	Ca22chr5A_C_albicans_SC5314	-	ATT	245851-245916	IPSIVHFPSGYLLFHFCCLFIC	ATTCCAAGCATAGTTCATTTTCCATCTGGTTATTTGCTTTTCCATTTCTGCTGCTTGTTTATTTGT	0	1.67667
C5_01240W_A-T_276792_276875_84	C5_01240W_A	AUR1	Ca22chr5A_C_albicans_SC5314	+	ATA	276792-276875	IYIIDLFLLLFSLESDDYTRTTIPPILI	ATATATATTATTGATTTGTTCCTGTTGTTATTTAGTTTAGAATCAGACGACTACACCAGAACCACAATTCCACCAATACTTATA	0.656	10.283
C5_01240W_A-T_276658_276828_171	C5_01240W_A	AUR1	Ca22chr5A_C_albicans_SC5314	+	ATT	276658-276828	IHQFYKEHIPRNSVYINVLIILHTSPLPRYIRTTIFLDHIDSFTLYILLICSCCYLV	ATTCATCAATTTTATAAAGAACACATACCTAGGAACAGTGTATATATTAACGTGTTGATAATATTACACACCTCTCCTCTTCCCCGCTACATTAGAACCACCATTTTTTTAGATCATATTGATAGTTTTACTTTATATATATTATTGATTTGTTCCTGTTGTTATTTAGTT	6.24867	8.50833
C5_01240W_A-T_276838_276897_60	C5_01240W_A	AUR1	Ca22chr5A_C_albicans_SC5314	+	ACG	276838-276897	TTTPEPQFHQYLYRIWLGKK	ACGACTACACCAGAACCACAATTCCACCAATACTTATATAGAATCTGGCTTGGAAAAAAG	0	13.5317
C5_01740C_A-T_394249_394503_255	C5_01740C_A	MTLA1	Ca22chr5A_C_albicans_SC5314	-	AGG	394249-394503	RHKIKITFNLLVFSKAMNSEIESSLTLLKSVEKLVQATSVYKNEDNEEIFLQLKRERQENSNLHEETETLFHESLDRLMKVCHRV	AGGCACAAAATAAAAATCACCTTCAACCTCCTCGTTTTTTCCAAAGCAATGAACTCAGAAATAGAAAGTAGCTTAACACTTTTAAAAAGTGTAGAGAAACTAGTTCAAGCAACATCAGTATATAAGAATGAAGACAACGAGGAAATATTCTTACAATTGAAGCGTGAGAGGCAGGAGAACAGCAACCTGCATGAAGAAACAGAAACCCTTTTTCACGAGTCTTTGGATAGATTAATGAAGGTATGTCACCGTGTT	6.76133	0.915667
C5_01740C_A-T_393865_393933_69	C5_01740C_A	MTLA1	Ca22chr5A_C_albicans_SC5314	-	ATT	393865-393933	ILLRNFLKKYSRRTNSLIEEKGN	ATTCTACTAAGGAATTTCTTGAAAAAGTATTCGAGAAGAACAAACAGCCTAATCGAAGAGAAAGGGAAT	8.057	0.805667
C5_01740C_A-T_394272_394340_69	C5_01740C_A	MTLA1	Ca22chr5A_C_albicans_SC5314	-	GTG	394272-394340	VRGRRTATCMKKQKPFFTSLWID	GTGAGAGGCAGGAGAACAGCAACCTGCATGAAGAAACAGAAACCCTTTTTCACGAGTCTTTGGATAGAT	19.0813	0.966667
C5_01740C_A-T_393788_394273_486	C5_01740C_A	MTLA1	Ca22chr5A_C_albicans_SC5314	-	ATT	393788-394273	INEGMSPCLANMILNKRKRIIQITNIIKLSSIAGSKVQYELSLNNLYNLLLRTRKQEEEEAFIFPTVSTEEFALEQITFEVSDQMDDDKDSEDDILIKGEEIKKSKKKRQRLDNSTKEFLEKVFEKNKQPNRRERELIAEKHGVSLSQIRVWVCIIKQNIAN	ATTAATGAAGGTATGTCACCGTGTTTAGCTAATATGATCTTGAATAAAAGAAAACGAATAATTCAAATTACTAACATTATCAAGCTATCTTCCATTGCTGGATCGAAAGTTCAGTACGAACTAAGCCTCAATAATTTGTATAACTTGTTGTTAAGGACTCGCAAGCAGGAAGAAGAAGAAGCTTTCATTTTTCCCACAGTAAGTACCGAAGAGTTTGCGTTGGAACAAATAACCTTTGAAGTAAGCGACCAGATGGATGATGATAAAGATAGCGAAGATGATATTTTAATAAAAGGGGAGGAAATAAAAAAGTCAAAAAAGAAACGACAAAGACTAGACAATTCTACTAAGGAATTTCTTGAAAAAGTATTCGAGAAGAACAAACAGCCTAATCGAAGA…	4.36633	5.789
C5_01970C_A-T_443456_443632_177	C5_01970C_A	CDC24	Ca22chr5A_C_albicans_SC5314	-	AAG	443456-443632	KTRSEKKCENLLNKKETEKEKVNEHQRQEEKKNSNNRNKHQQTLTSATSRRPIYINQSH	AAGACAAGGAGTGAAAAAAAGTGTGAGAATTTGCTAAACAAAAAAGAGACAGAAAAAGAAAAAGTTAACGAACACCAAAGACAGGAAGAAAAAAAAAATTCCAACAACAGGAACAAACATCAACAAACATTAACATCAGCAACAAGCAGAAGACCAATATACATTAACCAATCACAC	1.915	2.638
C5_01970C_A-T_443503_443589_87	C5_01970C_A	CDC24	Ca22chr5A_C_albicans_SC5314	-	AAG	443503-443589	KRQKKKKLTNTKDRKKKKIPTTGTNINKH	AAGAGACAGAAAAAGAAAAAGTTAACGAACACCAAAGACAGGAAGAAAAAAAAAATTCCAACAACAGGAACAAACATCAACAAACAT	0	1.99633
C5_01970C_A-T_443469_443555_87	C5_01970C_A	CDC24	Ca22chr5A_C_albicans_SC5314	-	AAG	443469-443555	KTGRKKKFQQQEQTSTNINISNKQKTNIH	AAGACAGGAAGAAAAAAAAAATTCCAACAACAGGAACAAACATCAACAAACATTAACATCAGCAACAAGCAGAAGACCAATATACAT	3.896	4.08933
C5_01970C_A-T_443388_443462_75	C5_01970C_A	CDC24	Ca22chr5A_C_albicans_SC5314	-	ATC	443388-443462	ITLNLLINYLLISSSFFFFCCILKK	ATCACACTGAACTTACTCATAAACTACTTGCTCATATCTTCCTCTTTTTTTTTTTTTTGCTGCATATTGAAGAAA	0	8.151
C5_02000C_A-T_448702_448764_63	C5_02000C_A	ACH1	Ca22chr5A_C_albicans_SC5314	-	ATT	448702-448764	ILSIESIIKKNNISIVIKFTF	ATTCTATCAATTGAATCAATTATAAAGAAAAACAATATATCAATTGTAATTAAGTTTACTTTC	1.139	4.71367
C5_02000C_B-T_448761_448868_108	C5_02000C_B	C5_02000C_B	Ca22chr5B_C_albicans_SC5314	-	ATT	448761-448868	ILSIESIIKKNNISIVIKFTFQKSHFLIIIITLGFL	ATTCTATCAATTGAATCAATTATAAAGAAAAACAATATATCAATTGTAATTAAGTTTACTTTCCAAAAATCCCACTTCCTTATTATTATTATTACATTAGGTTTTTTA	0.765333	1.343
C5_02190C_A-T_488051_488185_135	C5_02190C_A	C5_02190C_A	Ca22chr5A_C_albicans_SC5314	-	ATT	488051-488185	ISIETVTMKTAARLLKYVQSIKFVGGPHPAPSMLHKHFLPIVVQY	ATTTCCATTGAAACAGTTACAATGAAAACTGCAGCTAGACTATTAAAATACGTTCAATCAATAAAATTTGTGGGTGGACCACATCCAGCACCAAGTATGTTGCACAAACACTTTCTCCCGATAGTTGTTCAATAC	50.7103	99.9957
C5_02340C_A-T_521715_521843_129	C5_02340C_A	CST20	Ca22chr5A_C_albicans_SC5314	-	AAG	521715-521843	KSNVYTRTPSYTPHTYWIQFLFYCLIYIQPLTITNSFQLIFTI	AAGTCTAACGTATATACGCGTACACCATCTTATACTCCACATACATATTGGATTCAATTTTTATTTTATTGTTTAATTTATATCCAACCACTGACAATTACTAATAGTTTTCAATTAATATTCACAATT	1.35867	4.84067
C5_02340C_A-T_521771_521950_180	C5_02340C_A	CST20	Ca22chr5A_C_albicans_SC5314	-	ATT	521771-521950	ISPLTQHIHLINNNHNSTHFTITYKSNNYNLTILTLSLTYIRVHHLILHIHIGFNFYFIV	ATTTCACCACTCACTCAACACATTCATTTAATCAACAACAACCACAACAGTACCCACTTTACAATCACTTACAAGTCAAATAATTACAACTTGACAATCCTCACTTTAAGTCTAACGTATATACGCGTACACCATCTTATACTCCACATACATATTGGATTCAATTTTTATTTTATTGTT	0.774333	2.592
C5_02340C_A-T_521743_521832_90	C5_02340C_A	CST20	Ca22chr5A_C_albicans_SC5314	-	ATA	521743-521832	IYAYTILYSTYILDSIFILLFNLYPTTDNY	ATATACGCGTACACCATCTTATACTCCACATACATATTGGATTCAATTTTTATTTTATTGTTTAATTTATATCCAACCACTGACAATTAC	0.398667	2.70067
C5_02490C_A-T_556487_556576_90	C5_02490C_A	TIF5	Ca22chr5A_C_albicans_SC5314	-	ATA	556487-556576	IIKTLQLPPPPPPPPPLPRPPSSLFTLLQN	ATAATTAAGACATTACAATTACCTCCTCCTCCCCCCCCCCCCCCCCCCCTCCCCCGTCCCCCTTCCTCCCTTTTTACCCTTCTCCAAAAT	4.841	22.4673
C5_02580W_A-T_575880_575957_78	C5_02580W_A	C5_02580W_A	Ca22chr5A_C_albicans_SC5314	+	ATC	575880-575957	INQPHSLIIISIQYLYINHHHHHHHQ	ATCAATCAACCACATAGTTTGATTATAATCAGTATACAATATTTGTACATAAATCATCATCATCATCATCATCATCAA	1.73333	3.56333
C5_02620C_A-T_588898_589062_165	C5_02620C_A	C5_02620C_A	Ca22chr5A_C_albicans_SC5314	-	ATC	588898-589062	IFNPFYFFISITNQYSINCDHYHQEQEERLGIFITSLIYFFCYQTFFFIFREQTL	ATCTTCAATCCATTCTATTTCTTTATATCAATCACAAACCAATATTCAATCAACTGTGATCATTATCATCAAGAACAAGAAGAAAGACTTGGAATATTCATTACTAGTTTAATTTATTTTTTTTGCTATCAAACATTTTTTTTTATTTTTCGTGAACAAACTCTG	1.336	2.38467
C5_02620C_A-T_588870_588947_78	C5_02620C_A	C5_02620C_A	Ca22chr5A_C_albicans_SC5314	-	ATT	588870-588947	IFFAIKHFFLFFVNKLCKVFIFYIRF	ATTTTTTTTGCTATCAAACATTTTTTTTTATTTTTCGTGAACAAACTCTGTAAAGTGTTTATATTCTATATACGATTC	2.826	4.047
C5_03020W_A-T_667867_667941_75	C5_03020W_A	CCC2	Ca22chr5A_C_albicans_SC5314	+	AGG	667867-667941	RLKETDHQIRRKPNPEKKKTKKKKN	AGGTTGAAAGAAACTGATCACCAAATTAGAAGAAAGCCGAATCCCGAAAAAAAGAAAACAAAAAAAAAAAAAAAT	3.832	2.174
C5_03020W_A-T_667874_667975_102	C5_03020W_A	CCC2	Ca22chr5A_C_albicans_SC5314	+	AAG	667874-667975	KKLITKLEESRIPKKRKQKKKKININLYHSSLFL	AAGAAACTGATCACCAAATTAGAAGAAAGCCGAATCCCGAAAAAAAGAAAACAAAAAAAAAAAAAAATTAATATCAATTTGTATCATTCTTCTCTTTTCCTT	2.818	1.56233
C5_03020W_A-T_667896_667979_84	C5_03020W_A	CCC2	Ca22chr5A_C_albicans_SC5314	+	AAG	667896-667979	KKAESRKKENKKKKKLISICIILLFSFE	AAGAAAGCCGAATCCCGAAAAAAAGAAAACAAAAAAAAAAAAAAATTAATATCAATTTGTATCATTCTTCTCTTTTCCTTTGAA	3.42167	1.32333
C5_03150W_A-T_708672_708761_90	C5_03150W_A	C5_03150W_A	Ca22chr5A_C_albicans_SC5314	+	ATT	708672-708761	IHSFLILNSFLPIRSLDLFSQSLNRLRLLL	ATTCATTCATTCCTTATACTCAATTCCTTTCTTCCAATTAGATCGTTAGACTTGTTTTCTCAAAGTTTAAATCGTTTAAGGTTGTTGTTA	6.291	0.864667
C5_03150W_A-T_708798_708869_72	C5_03150W_A	C5_03150W_A	Ca22chr5A_C_albicans_SC5314	+	CTG	708798-708869	LFFEPDNQLSRIKRKQPKKYHQST	CTGTTTTTTGAGCCAGACAACCAACTTTCAAGAATAAAACGAAAACAACCAAAAAAATATCACCAATCAACT	2.79433	0.411667
C5_03150W_A-T_708975_709067_93	C5_03150W_A	C5_03150W_A	Ca22chr5A_C_albicans_SC5314	+	ACG	708975-709067	TKHRRQHFLFSGNQKKYYILHDSSSTVIVTQ	ACGAAACACAGACGGCAACACTTTTTGTTTAGCGGCAACCAAAAGAAATATTACATTCTACACGACTCCTCAAGTACCGTGATTGTCACACAA	7.833	1.19533
C5_03150W_A-T_708964_709053_90	C5_03150W_A	C5_03150W_A	Ca22chr5A_C_albicans_SC5314	+	ATT	708964-709053	IDHKRNTDGNTFCLAATKRNITFYTTPQVP	ATTGACCACAAACGAAACACAGACGGCAACACTTTTTGTTTAGCGGCAACCAAAAGAAATATTACATTCTACACGACTCCTCAAGTACCG	8.094	1.688
C5_03150W_A-T_709657_709764_108	C5_03150W_A	C5_03150W_A	Ca22chr5A_C_albicans_SC5314	+	TTG	709657-709764	LFARLSQSSYTSLSHFSPHHFFNLRLHPTIHSSSDL	TTGTTTGCTAGGCTTAGTCAATCATCCTATACTAGCCTTTCTCACTTTTCACCGCATCATTTTTTTAATTTGCGCCTACACCCAACTATCCACTCGTCATCAGATTTG	0	1.30867
C5_03150W_A-T_708587_708709_123	C5_03150W_A	C5_03150W_A	Ca22chr5A_C_albicans_SC5314	+	ATT	708587-708709	ILSLFFFCFLLSSINIISYLPTTFHTSSNSFIPYTQFLSSN	ATTCTCTCTCTATTTTTTTTTTGTTTTCTTCTTTCTTCTATTAACATCATATCCTACCTACCAACAACATTTCACACATCGTCTAATTCATTCATTCCTTATACTCAATTCCTTTCTTCCAAT	0.825667	0.391667
C5_03150W_A-T_708713_708805_93	C5_03150W_A	C5_03150W_A	Ca22chr5A_C_albicans_SC5314	+	ATC	708713-708805	IVRLVFSKFKSFKVVVITLYSHKQEGKLTVF	ATCGTTAGACTTGTTTTCTCAAAGTTTAAATCGTTTAAGGTTGTTGTTATAACATTATATTCTCATAAACAAGAGGGCAAATTAACTGTTTTT	7.15933	0.637667
C5_03150W_A-T_708827_709003_177	C5_03150W_A	C5_03150W_A	Ca22chr5A_C_albicans_SC5314	+	AAG	708827-709003	KNKTKTTKKISPINLKLLLLSNNQLNSESSIIVFKSRFRTTITNHRLTTNETQTATLFV	AAGAATAAAACGAAAACAACCAAAAAAATATCACCAATCAACTTGAAATTGTTATTGTTATCCAATAATCAATTGAATTCAGAGTCTTCTATCATAGTCTTCAAGAGTAGATTTCGAACTACAATAACTAACCATAGATTGACCACAAACGAAACACAGACGGCAACACTTTTTGTT	1.962	1.10967
C5_03150W_A-T_709838_709948_111	C5_03150W_A	C5_03150W_A	Ca22chr5A_C_albicans_SC5314	+	ATA	709838-709948	ITHFYFPFFPLPFASSPLSNLIRLRGLKIVVFYLLLL	ATAACACATTTTTATTTCCCGTTTTTTCCACTTCCATTTGCCTCCTCCCCACTTTCAAATCTTATTAGATTGAGAGGACTGAAAATAGTAGTATTTTATTTGTTACTATTA	2.093	2.27933
C5_03240W_A-T_731701_731784_84	C5_03240W_A	BUB3	Ca22chr5A_C_albicans_SC5314	+	TTG	731701-731784	LIIHLTIHSFNINSLYISTNLIAFLQLQ	TTGATTATTCATCTAACAATCCATTCTTTCAATATAAATTCATTATATATATCTACAAATTTGATTGCTTTCCTTCAATTACAG	0.854333	3.37733
C5_03400C_A-T_767554_767715_162	C5_03400C_A	C5_03400C_A	Ca22chr5A_C_albicans_SC5314	-	CTG	767554-767715	LNQKYDYQGIILTNNVIFFLNRKEDQDNNNNTEEELTILMHQNRKVQKEKLFWI	CTGAATCAGAAATATGATTATCAAGGAATTATACTAACAAACAATGTAATTTTTTTTTTGAATAGGAAAGAAGATCAAGACAACAACAACAATACAGAAGAAGAACTAACAATTCTAATGCACCAAAACAGGAAGGTCCAAAAAGAGAAGCTATTTTGGATT	69.2217	15.7287
C5_03400C_A-T_767715_767777_63	C5_03400C_A	C5_03400C_A	Ca22chr5A_C_albicans_SC5314	-	ATT	767715-767777	IDSESINNQSTMSDVSNLNNH	ATTGACAGTGAATCAATAAACAACCAATCAACCATGTCAGACGTAAGTAACCTGAACAACCAC	23.7147	60.635
C5_03400C_A-T_767423_767563_141	C5_03400C_A	C5_03400C_A	Ca22chr5A_C_albicans_SC5314	-	ATT	767423-767563	ILDLNKYKDQKIRVKFIGGREVVGILKGFDQLMNLVLENVTETLRGM	ATTTTGGATTTAAATAAATATAAAGATCAAAAAATAAGGGTGAAATTTATTGGAGGAAGAGAAGTAGTTGGAATTTTAAAAGGATTTGATCAATTGATGAATTTGGTATTGGAGAATGTAACAGAAACACTTAGAGGTATG	68.4993	55.0633
C5_03400C_B-T_767528_767668_141	C5_03400C_B	C5_03400C_B	Ca22chr5B_C_albicans_SC5314	-	ATT	767528-767668	ILDLNKYKDQKIRVKFIGGREVVGILKGFDQLMNLVLENVTETLRGM	ATTTTGGATTTAAATAAATATAAAGATCAAAAAATAAGGGTGAAATTTATTGGAGGAAGAGAAGTAGTAGGAATTTTAAAAGGATTTGATCAATTGATGAACTTGGTATTGGAGAATGTAACAGAAACACTTAGAGGTATG	1.04967	0.706
C5_03400C_B-T_767821_767883_63	C5_03400C_B	C5_03400C_B	Ca22chr5B_C_albicans_SC5314	-	ATT	767821-767883	IDSESINNQSTMSDVSNLNNH	ATTGACAGTGAATCAATAAACAATCAATCAACCATGTCAGACGTAAGTAACCTGAACAACCAC	14.7323	59.3523
C5_03400C_B-T_767659_767763_105	C5_03400C_B	C5_03400C_B	Ca22chr5B_C_albicans_SC5314	-	TTG	767659-767763	LNRKEDQDNNNNTEEEITILVHQNRKVQKEKLFWI	TTGAATAGGAAAGAAGACCAAGACAACAACAACAATACAGAAGAAGAAATAACAATTCTAGTGCACCAAAACAGGAAGGTCCAAAAAGAGAAGCTATTTTGGATT	39.3693	46.3737
C5_03550W_A-T_794401_794487_87	C5_03550W_A	C5_03550W_A	Ca22chr5A_C_albicans_SC5314	+	AAG	794401-794487	KRITLVHLITCITYFNTVQSWQKELQMSK	AAGCGTATAACACTAGTACACCTCATCACCTGTATCACTTATTTTAACACAGTGCAGTCATGGCAAAAAGAGTTGCAGATGAGCAAA	21.6337	71.6443
C5_03930C_A-T_861397_861546_150	C5_03930C_A	C5_03930C_A	Ca22chr5A_C_albicans_SC5314	-	ATA	861397-861546	IQRNLNILLSTISFLFPIFIFIFIPVYLKGKKWKEIDKISFNKVYPFFFF	ATACAAAGGAATCTTAATATATTATTGTCAACCATTTCATTCCTTTTCCCCATCTTTATTTTCATCTTCATACCAGTTTATTTGAAAGGAAAGAAGTGGAAGGAGATCGATAAGATTAGTTTCAACAAGGTATATCCGTTTTTTTTTTTT	7.05567	7.22833
C5_03930C_A-T_861702_861773_72	C5_03930C_A	C5_03930C_A	Ca22chr5A_C_albicans_SC5314	-	TTG	861702-861773	LLIFFYNYYPTNSSTYITACCCCI	TTGTTAATTTTTTTTTATAATTATTATCCCACCAATAGTTCAACATATATTACTGCTTGTTGTTGTTGTATT	1.37933	6.073
C5_03930C_A-T_861465_861569_105	C5_03930C_A	C5_03930C_A	Ca22chr5A_C_albicans_SC5314	-	ATT	861465-861569	ILNHQKKEYKGILIYYCQPFHSFSPSLFSSSYQFI	ATTTTAAATCACCAAAAGAAAGAATACAAAGGAATCTTAATATATTATTGTCAACCATTTCATTCCTTTTCCCCATCTTTATTTTCATCTTCATACCAGTTTATT	4.86733	3.62067
C5_03930C_A-T_861644_861757_114	C5_03930C_A	C5_03930C_A	Ca22chr5A_C_albicans_SC5314	-	ATA	861644-861757	IIIIPPIVQHILLLVVVVFEERKKERKKQCSYIYIYIR	ATAATTATTATCCCACCAATAGTTCAACATATATTACTGCTTGTTGTTGTTGTATTTGAAGAAAGAAAGAAAGAAAGAAAGAAACAGTGTTCATATATATATATATATATACGT	2.07933	8.159
C5_03930C_A-T_861437_861526_90	C5_03930C_A	C5_03930C_A	Ca22chr5A_C_albicans_SC5314	-	ATT	861437-861526	IIVNHFIPFPHLYFHLHTSLFERKEVEGDR	ATTATTGTCAACCATTTCATTCCTTTTCCCCATCTTTATTTTCATCTTCATACCAGTTTATTTGAAAGGAAAGAAGTGGAAGGAGATCGA	6.08067	9.57667
C5_03950W_A-T_868242_868424_183	C5_03950W_A	C5_03950W_A	Ca22chr5A_C_albicans_SC5314	+	AGG	868242-868424	RVLLLFFFFYYHLVFSNTFISSTLTTNTTFKTTPHNYIPTYTHTHSLFKFSNYFTFIISHS	AGGGTATTGCTTTTGTTTTTTTTTTTTTACTATCATCTAGTTTTTTCAAACACATTCATATCATCAACACTTACTACCAACACAACTTTCAAGACAACTCCACACAACTACATACCCACATACACACATACACATTCGTTGTTCAAATTTTCCAACTATTTTACATTCATTATCAGTCATTCA	0	5.033
C5_03950W_A-T_868445_868570_126	C5_03950W_A	C5_03950W_A	Ca22chr5A_C_albicans_SC5314	+	ATA	868445-868570	IYYTHTRDLILKSLIVWVPVILLFYNLYYLRKFLQLLLFVSY	ATATATTATACACACACGCGTGATCTTATTTTAAAAAGTCTTATTGTGTGGGTTCCTGTGATTTTATTATTCTATAATTTATACTATTTGAGGAAATTCTTACAATTGTTATTATTTGTTAGTTAT	5.51833	0.588333
C5_04090C_A-T_912388_912465_78	C5_04090C_A	SUI1	Ca22chr5A_C_albicans_SC5314	-	ATA	912388-912465	ISISSINLHQKTRQEKGIKTLSRFSN	ATATCTATTTCATCCATTAATCTACACCAGAAAACAAGACAAGAAAAAGGAATCAAGACTTTATCTAGGTTTTCAAAT	61.242	46.561
C5_04130C_A-T_921522_921602_81	C5_04130C_A	CHT2	Ca22chr5A_C_albicans_SC5314	-	GTG	921522-921602	VVFNLQIQFSLSFLFNFIPLTKQAKKK	GTGGTTTTCAATCTTCAAATCCAATTTAGTCTTTCGTTCTTATTTAATTTTATACCCTTAACAAAACAAGCCAAAAAGAAA	9.5	6.594
C5_04130C_A-T_921545_921607_63	C5_04130C_A	CHT2	Ca22chr5A_C_albicans_SC5314	-	ATT	921545-921607	IRWFSIFKSNLVFRSYLILYP	ATTAGGTGGTTTTCAATCTTCAAATCCAATTTAGTCTTTCGTTCTTATTTAATTTTATACCCT	8.187	2.17633
C5_04280C_A-T_950043_950108_66	C5_04280C_A	GLN3	Ca22chr5A_C_albicans_SC5314	-	CTG	950043-950108	LVFFYFFCFLFLFFYNKPYLEE	CTGGTTTTTTTTTATTTTTTTTGTTTCTTATTTTTATTTTTTTATAACAAACCCTACCTAGAGGAA	0	1.80467
C5_04280C_A-T_949893_950012_120	C5_04280C_A	GLN3	Ca22chr5A_C_albicans_SC5314	-	ATA	949893-950012	INHDSTDLKQYEDYCRFTEVYNYNTNKIFRKLLLPTHDEQ	ATAAACCACGATAGTACCGACCTAAAACAATACGAAGATTATTGTAGATTCACAGAAGTATACAACTACAACACCAATAAAATCTTTCGCAAACTCCTCCTCCCCACACACGACGAACAA	6.87033	7.163
C5_04290C_A-T_953518_953628_111	C5_04290C_A	C5_04290C_A	Ca22chr5A_C_albicans_SC5314	-	TTG	953518-953628	LIFQLQLPLVYIHYFFYFISIVIKDQIFYLHYPFVLK	TTGATATTTCAACTTCAACTTCCACTTGTATATATACATTATTTTTTTTATTTCATTAGTATTGTCATTAAAGATCAAATCTTCTATCTGCATTATCCGTTTGTGTTGAAA	10.669	20.2643
C5_04290C_A-T_953374_953514_141	C5_04290C_A	C5_04290C_A	Ca22chr5A_C_albicans_SC5314	-	AAG	953374-953514	KCIKGGNHFITEFAVLLIYYNYIFQSPCINSLFDQEIRVGSFFFIHK	AAGTGCATTAAGGGAGGAAATCATTTCATTACTGAATTTGCTGTCTTACTAATTTATTACAATTATATTTTTCAATCCCCTTGTATTAATAGCTTATTTGATCAAGAAATAAGAGTGGGTTCTTTCTTTTTTATACATAAA	2.59933	2.204
C5_04290C_A-T_953523_953603_81	C5_04290C_A	C5_04290C_A	Ca22chr5A_C_albicans_SC5314	-	TTG	953523-953603	LYIYIIFFISLVLSLKIKSSICIIRLC	TTGTATATATACATTATTTTTTTTATTTCATTAGTATTGTCATTAAAGATCAAATCTTCTATCTGCATTATCCGTTTGTGT	2.401	23.906
C5_04290C_B-T_953494_953637_144	C5_04290C_B	C5_04290C_B	Ca22chr5B_C_albicans_SC5314	-	AAG	953494-953637	KCIKGGNHFITEFAVLLIYYNYIFQSPCINSLFDQEIRVGSFFFISHK	AAGTGCATTAAGGGAGGAAATCATTTCATTACTGAATTTGCTGTCTTACTAATTTATTACAATTATATTTTTCAATCCCCTTGTATTAATAGCTTATTTGATCAAGAAATAAGAGTGGGTTCTTTCTTTTTTATTTCACATAAA	0	0.904333
C5_04300C_A-T_955523_955618_96	C5_04300C_A	C5_04300C_A	Ca22chr5A_C_albicans_SC5314	-	ATA	955523-955618	IITKPELINKQCRHQQHMKNYLCNHYSILLKN	ATAATTACTAAACCAGAACTCATCAACAAACAATGTCGACATCAACAACATATGAAAAATTACCTTTGCAACCATTATTCGATACTATTGAAGAAT	23.4607	162.718
C5_04300C_B-T_955646_955741_96	C5_04300C_B	C5_04300C_B	Ca22chr5B_C_albicans_SC5314	-	ATA	955646-955741	IITKPELINKQCRHQQHMKNYLCNHYSILLKN	ATAATTACTAAACCAGAACTCATCAACAAACAATGTCGACATCAACAACATATGAAAAATTACCTTTGCAACCATTATTCGATACTATTGAAGAAT	10.0847	13.513
C5_04570C_A-T_995572_995652_81	C5_04570C_A	URA7	Ca22chr5A_C_albicans_SC5314	-	ATA	995572-995652	IVCIYNHQSYFNNTVCLFTLVYSINWV	ATAGTTTGTATATATAACCATCAATCCTACTTTAATAATACCGTTTGTTTATTCACGTTAGTTTATTCCATTAATTGGGTT	1.226	6.542
C5_04570C_A-T_995463_995537_75	C5_04570C_A	URA7	Ca22chr5A_C_albicans_SC5314	-	ATT	995463-995537	IIVDGRVYIIFFCINESTITTISTF	ATTATAGTTGACGGACGTGTTTACATTATATTTTTTTGTATCAACGAATCAACAATAACAACAATAAGTACTTTT	31.3567	23.4813
C5_04590C_A-T_997458_997559_102	C5_04590C_A	RPL43A	Ca22chr5A_C_albicans_SC5314	-	ATT	997458-997559	IHIKQETSFTTIYKSIEQKHVTCNFGILSNCQGP	ATTCATATAAAACAAGAGACGTCATTTACAACTATCTACAAATCTATTGAACAAAAACACGTAACATGTAATTTTGGCATTTTATCAAATTGTCAAGGTCCA	0.540333	2.548
C5_04590C_A-T_997513_997593_81	C5_04590C_A	RPL43A	Ca22chr5A_C_albicans_SC5314	-	AAG	997513-997593	KSVKSSSINRPDSYKTRDVIYNYLQIY	AAGAGTGTCAAGAGTTCATCAATAAACAGGCCAGATTCATATAAAACAAGAGACGTCATTTACAACTATCTACAAATCTAT	1.02033	4.16933
C5_04730C_A-T_1029790_1029897_108	C5_04730C_A	SSD1	Ca22chr5A_C_albicans_SC5314	-	AAG	1029790-1029897	KSIVIFDLQQSLRRQKQKKKNTTYFHCSYQKKIREK	AAGTCAATTGTAATATTTGACTTACAACAGTCATTAAGAAGGCAAAAACAAAAGAAAAAAAATACTACTTACTTTCACTGTTCATATCAAAAAAAAATAAGAGAGAAG	4.76733	2.299
C5_04730C_A-T_1029942_1030040_99	C5_04730C_A	SSD1	Ca22chr5A_C_albicans_SC5314	-	ATT	1029942-1030040	ILPPRNQSLIQLVFVIPSPFLYKDHTIIWIYPQ	ATTTTACCACCACGTAATCAATCACTGATCCAACTTGTTTTCGTCATACCCTCCCCCTTTTTATATAAAGATCATACTATCATTTGGATATATCCCCAG	5.07367	5.642
C5_04730C_A-T_1029938_1030006_69	C5_04730C_A	SSD1	Ca22chr5A_C_albicans_SC5314	-	TTG	1029938-1030006	LFSSYPPPFYIKIILSFGYIPSN	TTGTTTTCGTCATACCCTCCCCCTTTTTATATAAAGATCATACTATCATTTGGATATATCCCCAGTAAT	8.07833	6.42267
C5_04730C_A-T_1029551_1029664_114	C5_04730C_A	SSD1	Ca22chr5A_C_albicans_SC5314	-	TTG	1029551-1029664	LIIFFFFQHFMQKKENHPLNHSTNCFYFFVYIQVFTFI	TTGATAATTTTTTTTTTCTTTCAACATTTTATGCAAAAAAAAGAGAATCACCCTTTAAATCATTCAACCAATTGCTTTTATTTTTTTGTTTATATTCAAGTTTTCACATTTATT	0.314667	1.56467
C5_04830W_A-T_1052766_1052834_69	C5_04830W_A	SFL2	Ca22chr5A_C_albicans_SC5314	+	AGG	1052766-1052834	RKHLRTENKVKQQSLSYTSQLHF	AGGAAACATTTACGAACAGAGAACAAAGTTAAACAACAATCATTATCTTATACATCCCAATTACACTTT	0	3.57633
C5_04830W_A-T_1053153_1053422_270	C5_04830W_A	SFL2	Ca22chr5A_C_albicans_SC5314	+	TTG	1053153-1053422	LILLFFFLIFHNFQFHHSKLINPILICFPLFFLFVFGLSPILWEIDCYIYIHTYINQLEIPPINFSSFPIFHINYLSIILIIAWNFCYFD	TTGATTCTATTGTTCTTCTTTTTGATATTTCACAATTTTCAATTCCATCATTCTAAACTGATAAACCCAATACTTATTTGTTTCCCCCTTTTTTTTTTGTTTGTTTTTGGCCTTTCCCCAATTTTGTGGGAAATAGATTGTTATATATATATACATACATATATTAATCAATTGGAAATTCCTCCTATAAACTTTTCCAGTTTTCCAATTTTTCATATTAACTATCTGTCTATTATTTTAATAATAGCTTGGAATTTTTGTTATTTTGAT	0.306	3.01267
C5_04830W_A-T_1052701_1052973_273	C5_04830W_A	SFL2	Ca22chr5A_C_albicans_SC5314	+	TTG	1052701-1052973	LVCSFDQLFSNYFVDKEKLEEKGNIYEQRTKLNNNHYLIHPNYTFRPFIWCFPSPLLLLIFLHPPDLYFFKIFETNNTKEKSILCQVKAQS	TTGGTTTGTTCATTTGATCAATTGTTTTCAAATTATTTTGTTGACAAGGAGAAGTTAGAAGAAAAAGGAAACATTTACGAACAGAGAACAAAGTTAAACAACAATCATTATCTTATACATCCCAATTACACTTTTAGACCTTTCATTTGGTGTTTCCCCTCCCCACTCCTCCTCCTCATCTTTTTACACCCCCCTGATTTATATTTTTTCAAGATATTTGAAACAAATAATACAAAGGAAAAAAGTATACTTTGTCAAGTCAAAGCACAATCA	0	1.86767
C5_04830W_A-T_1052992_1053051_60	C5_04830W_A	SFL2	Ca22chr5A_C_albicans_SC5314	+	AAG	1052992-1053051	KKNLGLRPIKDILLSSLKLC	AAGAAAAATCTTGGACTGAGACCAATTAAGGATATATTATTGTCAAGTTTAAAACTTTGT	4.619	7.10533
C5_04830W_A-T_1052804_1053007_204	C5_04830W_A	SFL2	Ca22chr5A_C_albicans_SC5314	+	ATC	1052804-1053007	IIILYIPITLLDLSFGVSPPHSSSSSFYTPLIYIFSRYLKQIIQRKKVYFVKSKHNHNRENTLRKILD	ATCATTATCTTATACATCCCAATTACACTTTTAGACCTTTCATTTGGTGTTTCCCCTCCCCACTCCTCCTCCTCATCTTTTTACACCCCCCTGATTTATATTTTTTCAAGATATTTGAAACAAATAATACAAAGGAAAAAAGTATACTTTGTCAAGTCAAAGCACAATCATAATAGGGAGAATACTTTAAGAAAAATCTTGGAC	2.26967	3.43667
C5_04830W_A-T_1053140_1053205_66	C5_04830W_A	SFL2	Ca22chr5A_C_albicans_SC5314	+	TTG	1053140-1053205	LLKQIDSIVLLFDISQFSIPSF	TTGTTGAAACAGATTGATTCTATTGTTCTTCTTTTTGATATTTCACAATTTTCAATTCCATCATTC	6.18	0.617667
C5_04830W_B-T_1052964_1053035_72	C5_04830W_B	C5_04830W_B	Ca22chr5B_C_albicans_SC5314	+	TTG	1052964-1053035	LVFPLPTPPPHLFTPPWFIFFQDI	TTGGTGTTCCCCCTCCCCACTCCTCCTCCTCATCTTTTTACACCCCCCTGGTTTATATTTTTTCAAGATATT	0.498333	3.52333
C5_04830W_B-T_1052818_1053108_291	C5_04830W_B	C5_04830W_B	Ca22chr5B_C_albicans_SC5314	+	TTG	1052818-1053108	LVCSFDQLFSNCSVDKGKLEEKGNNYEQRTKLNNNHYLIHPNYAFRPFIWCSPSPLLLLIFLHPPGLYFFKIFETNNTKEKSILCQVKTQFIIGRIL	TTGGTTTGTTCATTTGATCAATTGTTTTCAAATTGTTCTGTTGACAAGGGGAAGTTAGAAGAAAAAGGAAACAATTACGAACAGAGAACAAAGTTAAACAACAATCATTATCTTATACATCCCAATTACGCTTTTAGACCTTTCATTTGGTGTTCCCCCTCCCCACTCCTCCTCCTCATCTTTTTACACCCCCCTGGTTTATATTTTTTCAAGATATTTGAAACAAATAATACAAAGGAAAAAAGTATACTTTGTCAAGTCAAAACACAATTTATAATAGGGAGAATACTT	0.123333	2.247
C5_04830W_B-T_1052921_1053091_171	C5_04830W_B	C5_04830W_B	Ca22chr5B_C_albicans_SC5314	+	ATC	1052921-1053091	IIILYIPITLLDLSFGVPPPHSSSSSFYTPLVYIFSRYLKQIIQRKKVYFVKSKHNL	ATCATTATCTTATACATCCCAATTACGCTTTTAGACCTTTCATTTGGTGTTCCCCCTCCCCACTCCTCCTCCTCATCTTTTTACACCCCCCTGGTTTATATTTTTTCAAGATATTTGAAACAAATAATACAAAGGAAAAAAGTATACTTTGTCAAGTCAAAACACAATTTA	0.209667	2.177
C5_04960W_B-T_1087928_1088014_87	C5_04960W_B	C5_04960W_B	Ca22chr5B_C_albicans_SC5314	+	ATT	1087928-1088014	ISTPSSPPAHPSCLVSSQSSQQQLLQQQQ	ATTAGTACACCTTCCTCCCCCCCAGCACACCCATCGTGTTTAGTTAGCTCACAGTCCAGTCAACAACAACTACTACAACAACAACAA	1.458	2.17833
C6_00280W_A-T_32102_32161_60	C6_00280W_A	CPH2	Ca22chr6A_C_albicans_SC5314	+	TTG	32102-32161	LNSYNQQKTTYKQETTTVKL	TTGAATAGTTATAATCAACAGAAGACAACTTATAAACAAGAGACTACTACTGTGAAGTTA	12.48	6.29967
C6_00280W_A-T_32198_32278_81	C6_00280W_A	CPH2	Ca22chr6A_C_albicans_SC5314	+	ATA	32198-32278	IHIFFVKIIPSPFYFITHEHVYQNRDI	ATACATATTTTTTTTGTGAAAATCATCCCGTCCCCCTTTTATTTTATTACCCACGAACACGTTTATCAAAATAGAGATATC	3.40167	3.66633
C6_00280W_A-T_32390_32461_72	C6_00280W_A	CPH2	Ca22chr6A_C_albicans_SC5314	+	TTG	32390-32461	LCALAKKKTRSILFVKPTTAFFYT	TTGTGTGCATTAGCCAAAAAAAAAACTCGTTCGATTTTATTTGTGAAACCAACAACAGCTTTTTTTTACACG	0.765333	8.46933
C6_00280W_A-T_32161_32268_108	C6_00280W_A	CPH2	Ca22chr6A_C_albicans_SC5314	+	ATA	32161-32268	IIIFGLISPQFPYTYFFCENHPVPLLFYYPRTRLSK	ATAATTATATTTGGGTTAATATCACCACAGTTCCCCTATACATATTTTTTTTGTGAAAATCATCCCGTCCCCCTTTTATTTTATTACCCACGAACACGTTTATCAAAA	2.88367	2.681
C6_00280W_A-T_32392_32469_78	C6_00280W_A	CPH2	Ca22chr6A_C_albicans_SC5314	+	GTG	32392-32469	VCISQKKNSFDFICETNNSFFLHVNQ	GTGTGCATTAGCCAAAAAAAAAACTCGTTCGATTTTATTTGTGAAACCAACAACAGCTTTTTTTTACACGTAAATCAA	0.706333	8.103
C6_00290W_A-T_38729_38812_84	C6_00290W_A	C6_00290W_A	Ca22chr6A_C_albicans_SC5314	+	AAG	38729-38812	KIKVLTEDILVPTSDIVNKKVSVFGVKT	AAGATCAAAGTACTAACAGAAGATATATTAGTTCCAACAAGTGATATAGTCAACAAGAAAGTTTCGGTATTTGGTGTCAAAACT	0.328	2.364
C6_00290W_A-T_38822_38932_111	C6_00290W_A	C6_00290W_A	Ca22chr6A_C_albicans_SC5314	+	TTG	38822-38932	LTSIIFKGVKQQQSQKVTTFSSTHDIYKKRKNKNFFV	TTGACATCGATAATCTTTAAGGGAGTGAAGCAACAACAATCACAGAAAGTTACGACATTCTCTTCCACCCACGACATTTACAAAAAGAGGAAAAATAAAAATTTTTTTGTG	4.60433	2.308
C6_00290W_A-T_39011_39244_234	C6_00290W_A	C6_00290W_A	Ca22chr6A_C_albicans_SC5314	+	ATC	39011-39244	ITKDKTRRPYFAKKFRVTTIAPIHLKQKNIYFNRSASLERVDKFLKSILYCLLLFPHHLTQIADTHTHTYILESSPTE	ATCACTAAAGACAAAACTAGACGCCCATATTTTGCAAAGAAATTTAGAGTTACTACGATTGCTCCAATTCATTTGAAACAAAAAAATATATATTTTAACCGATCTGCAAGTTTAGAAAGAGTTGATAAATTTTTGAAGTCCATTCTTTACTGTCTATTATTATTTCCACATCACTTGACGCAAATAGCAGACACACACACGCACACATATATATTGGAGTCATCCCCCACTGAA	0.424333	3.093
C6_00290W_A-T_39386_39445_60	C6_00290W_A	C6_00290W_A	Ca22chr6A_C_albicans_SC5314	+	ATA	39386-39445	IVNFTIENKNKSQSTATRLN	ATAGTAAACTTCACGATCGAGAATAAGAACAAGTCACAATCAACAGCAACACGGTTGAAC	8.48567	9.52267
C6_00290W_A-T_39524_39622_99	C6_00290W_A	C6_00290W_A	Ca22chr6A_C_albicans_SC5314	+	TTG	39524-39622	LLVNNEKKVHQKKLETEKKRKRTNLLSQRKKKK	TTGTTAGTCAACAACGAAAAGAAAGTTCACCAAAAAAAACTGGAAACGGAAAAAAAAAGAAAAAGAACGAATTTATTATCACAACGAAAAAAAAAAAAA	0	7.81967
C6_00290W_A-T_38868_38963_96	C6_00290W_A	C6_00290W_A	Ca22chr6A_C_albicans_SC5314	+	AAG	38868-38963	KLRHSLPPTTFTKRGKIKIFLCSSATNQTQGN	AAGTTACGACATTCTCTTCCACCCACGACATTTACAAAAAGAGGAAAAATAAAAATTTTTTTGTGTAGCAGTGCCACAAACCAGACACAAGGCAAC	5.32367	2.59167
C6_00290W_A-T_39537_39704_168	C6_00290W_A	C6_00290W_A	Ca22chr6A_C_albicans_SC5314	+	ACG	39537-39704	TKRKFTKKNWKRKKKEKERIYYHNEKKKNKNTKNKRKFFFFVCPFFPPKKIKGTKK	ACGAAAAGAAAGTTCACCAAAAAAAACTGGAAACGGAAAAAAAAAGAAAAAGAACGAATTTATTATCACAACGAAAAAAAAAAAAATAAAAACACTAAAAATAAAAGAAAGTTTTTTTTTTTTGTTTGTCCTTTTTTCCCCCCTAAAAAAATCAAAGGTACCAAGAAA	0	8.45467
C6_00290W_A-T_39139_39240_102	C6_00290W_A	C6_00290W_A	Ca22chr6A_C_albicans_SC5314	+	ATT	39139-39240	IFEVHSLLSIIISTSLDANSRHTHAHIYIGVIPH	ATTTTTGAAGTCCATTCTTTACTGTCTATTATTATTTCCACATCACTTGACGCAAATAGCAGACACACACACGCACACATATATATTGGAGTCATCCCCCAC	0.973667	4.03933
C6_00290W_A-T_39580_39717_138	C6_00290W_A	C6_00290W_A	Ca22chr6A_C_albicans_SC5314	+	AAG	39580-39717	KKKNEFIITTKKKKIKTLKIKESFFFLFVLFSPLKKSKVPRNNNWY	AAGAAAAAGAACGAATTTATTATCACAACGAAAAAAAAAAAAATAAAAACACTAAAAATAAAAGAAAGTTTTTTTTTTTTGTTTGTCCTTTTTTCCCCCCTAAAAAAATCAAAGGTACCAAGAAATAATAACTGGTAT	0	8.171
C6_00370C_A-T_65991_66173_183	C6_00370C_A	NOP5	Ca22chr6A_C_albicans_SC5314	-	ATA	65991-66173	ITNSLILNHPFIHHLVFIKLDTGSAINSVNFFYPNLSLDHFIKTYLDIFVFIEVCFNFSNI	ATAACAAATTCTTTGATTCTGAACCACCCATTCATCCATCACCTAGTTTTTATCAAACTTGATACCGGATCAGCTATTAATAGTGTTAATTTTTTTTATCCCAACTTATCATTAGATCATTTTATAAAAACTTACCTGGATATATTCGTCTTCATTGAAGTTTGTTTCAACTTTTCTAATATT	7.86267	40.042
C6_00440C_A-T_78760_78825_66	C6_00440C_A	FET34	Ca22chr6A_C_albicans_SC5314	-	ATT	78760-78825	IHIQETLYILLPSSADSFLSYS	ATTCACATCCAGGAAACACTGTATATCCTATTACCATCATCAGCTGATTCCTTTCTATCATATTCT	3.83933	40.428
C6_00440C_A-T_78622_78684_63	C6_00440C_A	FET34	Ca22chr6A_C_albicans_SC5314	-	ATT	78622-78684	IFCNTIKQNQFSKTSSDLNKS	ATTTTCTGTAATACTATAAAACAAAACCAGTTTTCCAAGACATCCAGTGATTTGAACAAATCT	2.71533	4.05867
C6_00440C_A-T_78717_78815_99	C6_00440C_A	FET34	Ca22chr6A_C_albicans_SC5314	-	AGG	78717-78815	RKHCISYYHHQLIPFYHILENKKVGYISWKVLI	AGGAAACACTGTATATCCTATTACCATCATCAGCTGATTCCTTTCTATCATATTCTTGAGAATAAAAAGGTCGGTTATATTTCTTGGAAGGTGCTAATA	7.60467	36.3847
C6_00480C_A-T_89377_89631_255	C6_00480C_A	FET31	Ca22chr6A_C_albicans_SC5314	-	AAG	89377-89631	KQIHFSCNLTLSQFLFSFFGFLYCHFLYFLFLKITKLVIEGVSFINKFAQVKSSLIVKVNISLLLLLFHPLLPLVLSFPVSLTTW	AAGCAAATCCATTTCTCTTGCAACTTAACATTGAGTCAATTTCTCTTTTCCTTCTTTGGGTTTCTCTATTGTCATTTTTTGTATTTTTTATTTTTAAAAATAACCAAATTAGTTATTGAAGGGGTTTCATTCATTAACAAATTTGCTCAAGTCAAGTCAAGTCTCATAGTCAAAGTTAACATTTCATTGCTACTGTTACTTTTCCACCCCTTGCTCCCGCTGGTATTGTCTTTTCCGGTTTCCCTAACAACTTGG	1.60067	0.506667
C6_00480C_A-T_89388_89459_72	C6_00480C_A	FET31	Ca22chr6A_C_albicans_SC5314	-	AAG	89388-89459	KLTFHCYCYFSTPCSRWYCLFRFP	AAGTTAACATTTCATTGCTACTGTTACTTTTCCACCCCTTGCTCCCGCTGGTATTGTCTTTTCCGGTTTCCC	4.405	0.669
C6_00650C_A-T_115469_115558_90	C6_00650C_A	RPS13	Ca22chr6A_C_albicans_SC5314	-	ATC	115469-115558	INKINQSSWVVCIHLYVINQSVTKISITYY	ATCAATAAAATAAATCAGTCATCATGGGTCGTATGCATTCATCTGTATGTTATCAATCAATCAGTCACTAAAATCAGCATCACATACTAT	195.607	219.069
C6_00650C_A-T_115408_115545_138	C6_00650C_A	RPS13	Ca22chr6A_C_albicans_SC5314	-	ATC	115408-115545	ISHHGSYAFICMLSINQSLKSASHTINMIVGTGVLKKKMDLFGFNK	ATCAGTCATCATGGGTCGTATGCATTCATCTGTATGTTATCAATCAATCAGTCACTAAAATCAGCATCACATACTATTAACATGATAGTGGGAACAGGAGTTTTAAAGAAAAAAATGGATTTGTTTGGCTTTAACAAA	122.69	139.511
C6_00650C_A-T_115129_115308_180	C6_00650C_A	RPS13	Ca22chr6A_C_albicans_SC5314	-	TTG	115129-115308	LIIARDGEEHWDGLIVSVSLLCLKISNLSNFNLLFSNMTCQILLQMLIGTFFSLHWDKFY	TTGATTATTGCTAGGGATGGAGAGGAACACTGGGATGGACTAATCGTCTCGGTGTCTCTTCTTTGTCTTAAAATTTCAAATCTAAGTAATTTCAATTTACTTTTTTCTAATATGACATGTCAAATATTGCTCCAGATGTTAATTGGAACTTTCTTTTCTTTGCATTGGGATAAGTTTTAC	0.352333	5.011
C6_00650C_A-T_115329_115427_99	C6_00650C_A	RPS13	Ca22chr6A_C_albicans_SC5314	-	ATT	115329-115427	ICLALTNEEVLPKVNNSSTVDNKQYLELLLYTL	ATTTGTTTGGCTTTAACAAATGAAGAGGTCTTGCCTAAAGTAAACAATTCGTCTACGGTCGACAATAAACAGTACCTAGAATTGTTACTATATACGCTT	0	6.738
C6_00670W_A-T_116712_116804_93	C6_00670W_A	CDC14	Ca22chr6A_C_albicans_SC5314	+	ATT	116712-116804	INSTSIIHLYFLHISTFCLSFKNTFVSTIPF	ATTAACTCAACGTCTATCATTCATTTGTATTTTCTACATATAAGTACATTTTGTCTTTCATTCAAAAACACGTTTGTTTCTACCATACCGTTC	4.82967	3.41067
C6_00830C_A-T_161709_161807_99	C6_00830C_A	CAN3	Ca22chr6A_C_albicans_SC5314	-	ATT	161709-161807	IYRNLEQICSFVFLFFLEASRIQLISLLNHGFT	ATTTATCGAAATTTAGAACAAATTTGTTCTTTTGTTTTTTTGTTTTTTTTAGAAGCTAGCCGTATTCAACTTATCAGCTTGTTAAACCATGGTTTTACT	0	3.119
C6_00830C_A-T_162437_162553_117	C6_00830C_A	CAN3	Ca22chr6A_C_albicans_SC5314	-	ATA	162437-162553	IHQISEQNNGLHNYYNRVRFEASSSKGSLLLLIVSILSS	ATACACCAAATCTCCGAGCAAAACAATGGATTACATAATTATTACAACCGTGTGAGATTTGAAGCAAGCTCATCTAAGGGTTCTTTGCTGTTGTTGATTGTATCTATACTTTCCAGC	4.17333	0.823333
C6_00830C_A-T_162077_162232_156	C6_00830C_A	CAN3	Ca22chr6A_C_albicans_SC5314	-	TTG	162077-162232	LVLLHKNIYHLLPILSLQKYQFRFIFQHTNPPTSWILKLNFKLFFLVVLITK	TTGGTCCTACTACACAAGAATATTTACCATTTACTACCAATTCTTAGTTTACAAAAGTATCAATTTCGTTTCATCTTTCAACACACAAATCCACCCACGAGTTGGATTTTGAAACTAAACTTTAAACTCTTCTTCTTGGTTGTACTCATCACAAAG	0.23	16.1627
C6_00830C_A-T_162502_162561_60	C6_00830C_A	CAN3	Ca22chr6A_C_albicans_SC5314	-	ATA	162502-162561	IMIYTKSPSKTMDYIIITTV	ATAATGATATACACCAAATCTCCGAGCAAAACAATGGATTACATAATTATTACAACCGTG	8.13833	0.123667
C6_00830C_A-T_162028_162093_66	C6_00830C_A	CAN3	Ca22chr6A_C_albicans_SC5314	-	TTG	162028-162093	LYSSQSESRKNIKKNTIQQRII	TTGTACTCATCACAAAGTGAATCGAGAAAAAACATAAAAAAAAACACAATTCAACAAAGAATTATC	0	35.227
C6_00830C_B-T_162432_162548_117	C6_00830C_B	C6_00830C_B	Ca22chr6B_C_albicans_SC5314	-	ATA	162432-162548	IHQISEQNNGLHNYYNRVRFEASSSKGSLLLLIVSILSS	ATACACCAAATCTCCGAGCAAAACAATGGATTACATAATTATTACAACCGTGTAAGATTTGAAGCAAGCTCATCTAAGGGTTCTTTGCTATTGTTGATTGTATCTATACTTTCCAGC	0.235333	1.68733
C6_00950C_A-T_189041_189157_117	C6_00950C_A	TOP1	Ca22chr6A_C_albicans_SC5314	-	ATA	189041-189157	IKKFFIINFTTHLISNWAKIESNFITYNQKTIQEQYHYY	ATAAAAAAGTTTTTCATCATTAATTTCACCACACATCTCATTAGCAATTGGGCAAAAATAGAAAGTAATTTTATAACTTATAACCAAAAAACAATTCAAGAACAATATCATTATTAC	3.37667	0.633333
C6_00950C_A-T_188912_189037_126	C6_00950C_A	TOP1	Ca22chr6A_C_albicans_SC5314	-	ATT	188912-189037	IYHGICFANQVRTISINLLISLVVIIKTDYFSYHHHQEYSVI	ATTTATCACGGAATTTGTTTTGCAAATCAAGTAAGAACAATTTCCATCAATTTACTCATCAGTTTGGTTGTAATAATAAAAACAGATTATTTTTCTTATCATCACCACCAAGAGTATTCCGTTATT	4.61767	3.44233
C6_00950C_A-T_188887_188952_66	C6_00950C_A	TOP1	Ca22chr6A_C_albicans_SC5314	-	ATT	188887-188952	IIFLIITTKSIPLFKSIICSFI	ATTATTTTTCTTATCATCACCACCAAGAGTATTCCGTTATTTAAATCCATTATTTGTTCGTTCATA	2.79133	0.505333
C6_00950C_B-T_188875_188940_66	C6_00950C_B	C6_00950C_B	Ca22chr6B_C_albicans_SC5314	-	ATT	188875-188940	IIFLIITTKSIPLFKSIICSFI	ATTATTTTCCTTATCATCACCACCAAGAGTATTCCGTTATTTAAGTCCATTATTTGTTCGTTCATA	0.835	2.728
C6_01140C_A-T_222195_222272_78	C6_01140C_A	ARC18	Ca22chr6A_C_albicans_SC5314	-	ATA	222195-222272	ISRTNWELNVNTIKNLFSIRFIILTQ	ATATCAAGAACCAATTGGGAATTAAACGTAAATACCATAAAAAATCTATTTTCCATCCGCTTTATCATATTAACCCAA	7.83367	3.06867
C6_01150W_A-T_224100_224240_141	C6_01150W_A	CDC20	Ca22chr6A_C_albicans_SC5314	+	AAG	224100-224240	KIHIIDQLQSIFAYFHSSIILIQPLTLCHWYLPTVNQQFSKIATIFF	AAGATCCATATCATTGATCAACTACAATCCATTTTTGCTTATTTCCATTCATCTATAATACTTATTCAACCCCTAACATTATGTCATTGGTATCTCCCAACAGTAAACCAACAATTTTCAAAAATAGCAACAATATTCTTC	0.449667	1.554
C6_01150W_A-T_223582_223695_114	C6_01150W_A	CDC20	Ca22chr6A_C_albicans_SC5314	+	ATT	223582-223695	ILFCFFFFSSIVISIHQSNQLSKHNYKLIHFQLLATQL	ATTCTGTTCTGTTTTTTTTTCTTCTCTTCTATAGTCATTTCCATCCATCAGTCTAATCAACTATCCAAACATAACTACAAGCTCATTCACTTTCAACTGTTAGCAACTCAACTT	3.77133	18.65
C6_01150W_A-T_224077_224154_78	C6_01150W_A	CDC20	Ca22chr6A_C_albicans_SC5314	+	ATT	224077-224154	INFLPKKKRSISLINYNPFLLISIHL	ATTAATTTCCTTCCAAAAAAAAAAAGATCCATATCATTGATCAACTACAATCCATTTTTGCTTATTTCCATTCATCTA	0	1.76467
C6_01150W_A-T_224263_224331_69	C6_01150W_A	CDC20	Ca22chr6A_C_albicans_SC5314	+	ATC	224263-224331	IVQIQKSIKKIIKCVNFSGTISQ	ATCGTCCAAATCCAAAAGTCCATCAAGAAAATCATCAAATGTGTCAATTTCAGCGGCACCATCAGCCAA	29.119	5.70267
C6_01150W_A-T_223964_224113_150	C6_01150W_A	CDC20	Ca22chr6A_C_albicans_SC5314	+	ATT	223964-224113	IHYTIIVVIKSILSHNCIVTSFFFKLEISFLAFLIINSLISFQKKKDPYH	ATTCATTATACTATTATCGTTGTGATTAAAAGTATATTGTCCCATAATTGCATTGTTACTTCATTTTTTTTTAAATTAGAAATTTCCTTTCTTGCCTTTTTAATAATTAATTCATTAATTTCCTTCCAAAAAAAAAAAGATCCATATCAT	0.239333	1.33733
C6_01340C_A-T_267717_267998_282	C6_01340C_A	C6_01340C_A	Ca22chr6A_C_albicans_SC5314	-	ATA	267717-267998	IKLKKKKPSKEWKLVFSTMFNLNLSATLNVSRLLYNPSLCLPHITVKSFDQLVLPFTIPTAPNVTIKGVVLDKDNCFAKDHDDKVWPEYEVCLL	ATAAAACTGAAAAAAAAAAAGCCTTCTAAAGAGTGGAAATTGGTATTTTCAACAATGTTTAACCTAAATCTTAGTGCAACGTTAAATGTTTCAAGATTGCTTTATAATCCAAGTTTATGTCTTCCTCATATCACTGTGAAATCATTTGATCAACTTGTGTTACCATTCACAATACCAACAGCACCAAATGTAACCATTAAAGGCGTAGTGTTAGACAAAGACAATTGTTTTGCAAAGGATCATGACGACAAAGTCTGGCCCGAATATGAAGTATGTTTGCTA	19.0647	14.457
C6_01340C_A-T_267683_267781_99	C6_01340C_A	C6_01340C_A	Ca22chr6A_C_albicans_SC5314	-	AAG	267683-267781	KTIVLQRIMTTKSGPNMKYVCYSPDQLIILLLF	AAGACAATTGTTTTGCAAAGGATCATGACGACAAAGTCTGGCCCGAATATGAAGTATGTTTGCTATAGTCCCGACCAACTGATTATATTATTGTTGTTT	28.854	5.12467
C6_01360W_A-T_272045_272212_168	C6_01360W_A	C6_01360W_A	Ca22chr6A_C_albicans_SC5314	+	ATA	272045-272212	ISFLIIYSISISSVYYQVNIHWSSNYIYILTFYNQKVYNNFISLIPCFLEIQAKDI	ATATCATTCCTCATTATTTATTCCATTTCAATTTCGTCAGTGTATTACCAAGTCAATATTCATTGGTCTAGTAATTACATTTATATTCTTACTTTCTACAATCAAAAAGTTTACAACAATTTCATTTCATTGATCCCCTGTTTTCTGGAGATTCAAGCAAAAGACATA	18.954	21.8427
C6_01360W_A-T_272064_272174_111	C6_01360W_A	C6_01360W_A	Ca22chr6A_C_albicans_SC5314	+	ATT	272064-272174	IPFQFRQCITKSIFIGLVITFIFLLSTIKKFTTISFH	ATTCCATTTCAATTTCGTCAGTGTATTACCAAGTCAATATTCATTGGTCTAGTAATTACATTTATATTCTTACTTTCTACAATCAAAAAGTTTACAACAATTTCATTTCAT	12.208	11.169
C6_01360W_A-T_272047_272112_66	C6_01360W_A	C6_01360W_A	Ca22chr6A_C_albicans_SC5314	+	ATC	272047-272112	IIPHYLFHFNFVSVLPSQYSLV	ATCATTCCTCATTATTTATTCCATTTCAATTTCGTCAGTGTATTACCAAGTCAATATTCATTGGTC	0.543667	18.054
C6_01360W_A-T_272173_272295_123	C6_01360W_A	C6_01360W_A	Ca22chr6A_C_albicans_SC5314	+	ATT	272173-272295	IDPLFSGDSSKRHIIYTHTHTFTTTTTSNFYISLKSFFHTL	ATTGATCCCCTGTTTTCTGGAGATTCAAGCAAAAGACATATAATATACACACACACACATACTTTTACAACCACCACAACTAGTAATTTTTATATTTCATTAAAAAGTTTCTTTCACACCTTA	47.875	24.1463
C6_01560W_A-T_319512_319613_102	C6_01560W_A	C6_01560W_A	Ca22chr6A_C_albicans_SC5314	+	ATC	319512-319613	INNHHNNYYYLPPPPLLFLFCYHPTYIHSHTPIN	ATCAACAACCACCACAATAATTACTACTACTTGCCGCCCCCCCCCCTCCTTTTTTTGTTTTGCTACCACCCTACATATATACACAGTCACACACCCATAAAC	49.4133	5.06633
C6_01560W_A-T_319477_319608_132	C6_01560W_A	C6_01560W_A	Ca22chr6A_C_albicans_SC5314	+	ATC	319477-319608	IKTNSKQQNKQLSTTTTIITTTCRPPPSFFCFATTLHIYTVTHP	ATCAAAACAAACTCAAAACAACAAAATAAGCAACTATCAACAACCACCACAATAATTACTACTACTTGCCGCCCCCCCCCCTCCTTTTTTTGTTTTGCTACCACCCTACATATATACACAGTCACACACCCA	22.4183	4.47633
C6_01560W_A-T_319571_319636_66	C6_01560W_A	C6_01560W_A	Ca22chr6A_C_albicans_SC5314	+	TTG	319571-319636	LLPPYIYTQSHTHKLINFNYSL	TTGCTACCACCCTACATATATACACAGTCACACACCCATAAACTGATAAATTTTAATTATTCTCTT	71.0207	3.40967
C6_01590W_A-T_328066_328251_186	C6_01590W_A	C6_01590W_A	Ca22chr6A_C_albicans_SC5314	+	TTG	328066-328251	LFFIHQHQPLTSPLPPFPFPVRLCLLFYHSPLHFHFQLINPIIFCLFILIDIHFYLCLNISV	TTGTTTTTTATCCATCAACACCAACCACTTACCTCCCCCCTTCCCCCTTTCCCCTTCCCCGTTAGACTTTGTCTCCTATTTTATCATTCCCCCCTCCATTTCCATTTTCAACTCATCAATCCAATTATTTTTTGTTTATTTATTTTAATTGATATTCATTTCTACCTTTGTTTAAACATTAGTGTT	2.86467	2.90867
C6_01590W_A-T_328261_328383_123	C6_01590W_A	C6_01590W_A	Ca22chr6A_C_albicans_SC5314	+	ATT	328261-328383	IFNCISKYFFFVWEKNFIKIIQRKRNTKLFEGGEIELLISL	ATTTTTAATTGTATTTCTAAGTATTTTTTTTTTGTTTGGGAGAAAAATTTCATCAAAATTATCCAAAGGAAAAGAAATACCAAACTTTTTGAAGGAGGTGAAATAGAATTACTGATATCCCTA	0.291667	2.93067
C6_01590W_A-T_328037_328210_174	C6_01590W_A	C6_01590W_A	Ca22chr6A_C_albicans_SC5314	+	ATT	328037-328210	IDSLTYYIGFCFLSINTNHLPPPFPLSPSPLDFVSYFIIPPSISIFNSSIQLFFVYLF	ATTGATTCACTCACCTACTACATTGGTTTTTGTTTTTTATCCATCAACACCAACCACTTACCTCCCCCCTTCCCCCTTTCCCCTTCCCCGTTAGACTTTGTCTCCTATTTTATCATTCCCCCCTCCATTTCCATTTTCAACTCATCAATCCAATTATTTTTTGTTTATTTATTT	3.062	2.851
C6_01590W_A-T_328247_328363_117	C6_01590W_A	C6_01590W_A	Ca22chr6A_C_albicans_SC5314	+	GTG	328247-328363	VFNFTFLIVFLSIFFLFGRKISSKLSKGKEIPNFLKEVK	GTGTTTAATTTTACATTTTTAATTGTATTTCTAAGTATTTTTTTTTTGTTTGGGAGAAAAATTTCATCAAAATTATCCAAAGGAAAAGAAATACCAAACTTTTTGAAGGAGGTGAAA	0.306667	2.66933
C6_01590W_A-T_328134_328214_81	C6_01590W_A	C6_01590W_A	Ca22chr6A_C_albicans_SC5314	+	TTG	328134-328214	LSPILSFPPPFPFSTHQSNYFLFIYFN	TTGTCTCCTATTTTATCATTCCCCCCTCCATTTCCATTTTCAACTCATCAATCCAATTATTTTTTGTTTATTTATTTTAAT	4.197	3.88267
C6_01630W_A-T_337081_337203_123	C6_01630W_A	TIF3	Ca22chr6A_C_albicans_SC5314	+	TTG	337081-337203	LSICVCVCVSIINSLTIYNTHHFYQSKTNSNNSINLHIRYY	TTGTCTATCTGTGTGTGTGTGTGTGTGTCTATTATTAATAGTTTAACAATATATAATACACATCACTTTTATCAATCAAAAACAAATTCGAATAATTCAATAAATCTACATATCCGATATTAT	11.6803	8.759
C6_01630W_B-T_337034_337159_126	C6_01630W_B	C6_01630W_B	Ca22chr6B_C_albicans_SC5314	+	ATT	337034-337159	INCLSVCVCVSIINSLTIYNTHHFYQSKTNSNNSINLHIRYY	ATTAATTGTCTATCTGTGTGTGTGTGTGTGTCTATTATTAATAGTTTAACAATATATAATACACATCACTTTTATCAATCAAAAACAAATTCGAATAATTCAATAAATCTGCATATCCGATATTAT	5.32933	2.88633
C6_01630W_B-T_337017_337079_63	C6_01630W_B	C6_01630W_B	Ca22chr6B_C_albicans_SC5314	+	ATA	337017-337079	INYNFQLIVYLCVCVCLLLIV	ATAAACTATAATTTCCAATTAATTGTCTATCTGTGTGTGTGTGTGTGTCTATTATTAATAGTT	1.91233	3.596
C6_01670W_A-T_350452_350556_105	C6_01670W_A	MAE1	Ca22chr6A_C_albicans_SC5314	+	TTG	350452-350556	LLRGLFFSLICTYWGHLTFRKANIINFKIELLISN	TTGCTCCGTGGTCTTTTTTTCTCCCTCATCTGTACCTATTGGGGACATCTTACCTTTCGAAAGGCTAATATTATAAATTTTAAAATAGAACTCCTCATTTCTAAT	9.93233	20.011
C6_01670W_A-T_350435_350524_90	C6_01670W_A	MAE1	Ca22chr6A_C_albicans_SC5314	+	ATA	350435-350524	IITPFHCSVVFFSPSSVPIGDILPFERLIL	ATAATTACCCCCTTCCATTGCTCCGTGGTCTTTTTTTCTCCCTCATCTGTACCTATTGGGGACATCTTACCTTTCGAAAGGCTAATATTA	7.72567	26.969
C6_01670W_A-T_350451_350516_66	C6_01670W_A	MAE1	Ca22chr6A_C_albicans_SC5314	+	ATT	350451-350516	IAPWSFFLPHLYLLGTSYLSKG	ATTGCTCCGTGGTCTTTTTTTCTCCCTCATCTGTACCTATTGGGGACATCTTACCTTTCGAAAGGC	3.49533	27.3437
C6_01970C_A-T_403609_403683_75	C6_01970C_A	RPL25	Ca22chr6A_C_albicans_SC5314	-	ATC	403609-403683	INSEIFYTLHKVVHHRITTMARMFR	ATCAATAGTGAAATTTTTTATACTCTTCATAAGGTTGTACATCATAGAATAACAACAATGGCTCGTATGTTTAGA	1275.72	714.404
C6_02050W_A-T_418888_418971_84	C6_02050W_A	DBR1	Ca22chr6A_C_albicans_SC5314	+	ATA	418888-418971	ITFNYSKEIRMKQSKGKRTEKKNCKKPK	ATAACATTTAACTATTCAAAAGAGATACGAATGAAGCAAAGTAAAGGGAAGAGAACAGAAAAAAAAAATTGTAAGAAACCAAAA	1.18233	31.504
C6_02050W_A-T_418931_418996_66	C6_02050W_A	DBR1	Ca22chr6A_C_albicans_SC5314	+	AAG	418931-418996	KGREQKKKIVRNQNNMYEKHNI	AAGGGAAGAGAACAGAAAAAAAAAATTGTAAGAAACCAAAATAATATGTATGAGAAACACAATATA	0	2.98367
C6_02060W_A-T_421998_422207_210	C6_02060W_A	SLM2	Ca22chr6A_C_albicans_SC5314	+	ATT	421998-422207	INIVGFHLQLKIKFHLQHQQTTSTSTKKKELPIFNLLSQHLSFLLPTPLQLNNLCFNTQIIQLCHHIIRW	ATTAATATTGTGGGATTCCATTTACAACTAAAAATTAAATTCCATTTACAACATCAACAAACAACATCAACATCAACAAAAAAAAAAGAACTTCCCATTTTTAATCTTTTATCCCAACATTTATCTTTCCTTCTCCCCACGCCCCTCCAACTAAATAATCTTTGCTTCAATACCCAGATCATCCAACTATGCCATCACATAATCCGTTGG	0.352667	7.42833
C6_02070C_A-T_425817_425915_99	C6_02070C_A	RPL23A	Ca22chr6A_C_albicans_SC5314	-	ATA	425817-425915	IYINQQCQDQVLPVTNSVCLYVIKDHNYYNIIN	ATATATATTAATCAACAATGTCAGGATCAGGTGCTTCCGGTAACAAATTCCGTATGTCTGTATGTAATCAAAGATCATAATTATTATAATATTATCAAT	367.476	437.468
C6_02070C_A-T_425839_425898_60	C6_02070C_A	RPL23A	Ca22chr6A_C_albicans_SC5314	-	ATG	425839-425898	MSGSGASGNKFRMSVCNQRS	ATGTCAGGATCAGGTGCTTCCGGTAACAAATTCCGTATGTCTGTATGTAATCAAAGATCA	524.857	705.428
C6_02090C_A-T_429754_429909_156	C6_02090C_A	C6_02090C_A	Ca22chr6A_C_albicans_SC5314	-	ATA	429754-429909	ILFSILFESKQPKQEQQQVLERDLLNYFIHQPPSIIVIILGSSFITLTISAN	ATATTGTTTTCAATTTTATTTGAAAGTAAACAACCAAAACAAGAACAACAACAAGTACTGGAGAGAGATTTATTAAACTATTTTATCCACCAACCACCATCTATTATAGTTATTATACTTGGTTCTAGTTTTATTACCTTGACGATATCGGCAAAT	0.583333	1.622
C6_02120W_A-T_437873_437971_99	C6_02120W_A	CHC1	Ca22chr6A_C_albicans_SC5314	+	ATC	437873-437971	ISFVYQKRKRFNTTTPLLKEIKTKIKSLKVFRT	ATCAGTTTTGTATATCAGAAGAGAAAGAGATTTAACACTACCACCCCTCTTCTCAAAGAAATAAAAACAAAAATAAAATCCCTGAAAGTTTTTAGAACA	14.619	30.8707
C6_02120W_A-T_437853_437933_81	C6_02120W_A	CHC1	Ca22chr6A_C_albicans_SC5314	+	ATT	437853-437933	INQKRERSVLYIRRERDLTLPPLFSKK	ATTAATCAAAAGAGGGAGAGATCAGTTTTGTATATCAGAAGAGAAAGAGATTTAACACTACCACCCCTCTTCTCAAAGAAA	9.446	40.411
C6_02120W_A-T_437821_437904_84	C6_02120W_A	CHC1	Ca22chr6A_C_albicans_SC5314	+	ATT	437821-437904	IHLNFEIKEKALIKRGRDQFCISEEKEI	ATTCATCTAAATTTTGAAATAAAAGAAAAAGCATTAATCAAAAGAGGGAGAGATCAGTTTTGTATATCAGAAGAGAAAGAGATT	17.5063	10.1723
C6_02120W_B-T_437857_437937_81	C6_02120W_B	C6_02120W_B	Ca22chr6B_C_albicans_SC5314	+	AAG	437857-437937	KRKRFNTTTPLLKEIKTKIKSLKVFRT	AAGAGAAAGAGATTTAACACTACCACCCCTCTCCTCAAAGAAATAAAAACAAAAATAAAATCCCTGAAAGTTTTTAGAACA	5.451	7.17633
C6_02120W_B-T_437819_437899_81	C6_02120W_B	C6_02120W_B	Ca22chr6B_C_albicans_SC5314	+	ATT	437819-437899	INQKRERSVLYIRRERDLTLPPLSSKK	ATTAATCAAAAGAGGGAGAGATCAGTTTTGTATATTAGAAGAGAAAGAGATTTAACACTACCACCCCTCTCCTCAAAGAAA	11.187	8.96067
C6_02120W_B-T_437787_437870_84	C6_02120W_B	C6_02120W_B	Ca22chr6B_C_albicans_SC5314	+	ATT	437787-437870	IHLNFEIKEKVLIKRGRDQFCILEEKEI	ATTCATCTAAATTTTGAAATAAAAGAAAAAGTATTAATCAAAAGAGGGAGAGATCAGTTTTGTATATTAGAAGAGAAAGAGATT	5.95833	3.22033
C6_02190C_A-T_455982_456104_123	C6_02190C_A	C6_02190C_A	Ca22chr6A_C_albicans_SC5314	-	CTG	455982-456104	LTNKNLSRATAITFITSITSTLTFNDTNNNNFYTLLNYNRL	CTGACCAACAAAAACTTATCAAGAGCAACTGCTATTACATTTATAACCTCAATCACGTCCACACTCACGTTTAACGATACAAACAACAACAATTTTTACACGTTACTTAATTATAACAGATTA	5.40233	9.34367
C6_02190C_A-T_455913_455978_66	C6_02190C_A	C6_02190C_A	Ca22chr6A_C_albicans_SC5314	-	ATA	455913-455978	IDRYARSPCDCNKSNKINFPFN	ATAGATAGATACGCACGTTCACCCTGTGATTGTAATAAATCAAACAAGATAAATTTCCCTTTTAAT	2.65567	4.32333
C6_02190C_A-T_455729_455803_75	C6_02190C_A	C6_02190C_A	Ca22chr6A_C_albicans_SC5314	-	AAG	455729-455803	KKPKVDQLLVQLSHCRRLLIFEYSN	AAGAAACCAAAAGTTGATCAATTGCTAGTCCAGTTGTCCCATTGTCGACGATTATTGATTTTTGAATATTCCAAT	0.478333	21.354
C6_02190C_A-T_456034_456156_123	C6_02190C_A	C6_02190C_A	Ca22chr6A_C_albicans_SC5314	-	CTG	456034-456156	LQLQQQQQQQQLQPSATTDQQKLIKSNCYYIYNLNHVHTHV	CTGCAACTGCAACAGCAACAACAACAGCAACAGCTACAACCGTCAGCAACAACTGACCAACAAAAACTTATCAAGAGCAACTGCTATTACATTTATAACCTCAATCACGTCCACACTCACGTT	6.29833	4.85467
C6_02260C_A-T_470566_470631_66	C6_02260C_A	SEC27	Ca22chr6A_C_albicans_SC5314	-	AAG	470566-470631	KYHFLFPYIYFIPLIYIHPYIY	AAGTATCATTTTCTTTTTCCATACATTTACTTTATTCCATTGATATACATACATCCATATATCTAT	2.08733	13.344
C6_02260C_A-T_470520_470579_60	C6_02260C_A	SEC27	Ca22chr6A_C_albicans_SC5314	-	ATC	470520-470579	IHISIKSRIIYSLLVSFFPC	ATCCATATATCTATTAAATCAAGGATAATATATTCACTACTTGTTTCCTTTTTTCCCTGT	0	16.972
C6_02260C_A-T_470555_470644_90	C6_02260C_A	SEC27	Ca22chr6A_C_albicans_SC5314	-	TTG	470555-470644	LNLIKVSFSFSIHLLYSIDIHTSIYLLNQG	TTGAACTTAATCAAAGTATCATTTTCTTTTTCCATACATTTACTTTATTCCATTGATATACATACATCCATATATCTATTAAATCAAGGA	1.53067	9.99133
C6_02330W_A-T_486355_486423_69	C6_02330W_A	C6_02330W_A	Ca22chr6A_C_albicans_SC5314	+	ATC	486355-486423	ILPARFYNLFISFIHSLTHSFTS	ATCCTTCCTGCTCGTTTTTATAATTTATTTATTTCATTTATTCACTCACTCACTCATTCATTCACATCT	19.154	112.071
C6_02340W_A-T_489566_489646_81	C6_02340W_A	HRR25	Ca22chr6A_C_albicans_SC5314	+	AAG	489566-489646	KHIHIFLLVFVVLIKEKENIYLSTQPN	AAGCATATACATATATTTTTATTAGTATTTGTTGTTTTAATCAAAGAAAAAGAGAATATATATTTGTCGACACAACCAAAC	1.72067	8.258
C6_02340W_A-T_489426_489587_162	C6_02340W_A	HRR25	Ca22chr6A_C_albicans_SC5314	+	ATT	489426-489587	ICFLFFLLINFIIHITFICQYQSIQLYIKTDQSNNHYHHQQKKKKKKSIYIYFY	ATTTGTTTCCTATTCTTTTTACTCATTAATTTTATTATACACATAACATTCATCTGTCAATATCAATCAATCCAATTATATATAAAGACAGATCAATCAAATAATCATTATCATCATCAACAAAAAAAAAAGAAAAAAAAAAGCATATACATATATTTTTAT	3.983	2.013
C6_02340W_A-T_489517_489651_135	C6_02340W_A	HRR25	Ca22chr6A_C_albicans_SC5314	+	ATC	489517-489651	INQIIIIIINKKKRKKKAYTYIFISICCFNQRKREYIFVDTTKLN	ATCAATCAAATAATCATTATCATCATCAACAAAAAAAAAAGAAAAAAAAAAGCATATACATATATTTTTATTAGTATTTGTTGTTTTAATCAAAGAAAAAGAGAATATATATTTGTCGACACAACCAAACTAAAC	5.608	6.739
C6_02670C_A-T_548944_549078_135	C6_02670C_A	WSC2	Ca22chr6A_C_albicans_SC5314	-	ATT	548944-549078	IHIHIHSHSHSLKSKNNLTSLHLNQYRIKTRINRLQVIIIKDTPP	ATTCATATTCATATTCATAGTCATAGTCATTCGTTGAAATCAAAGAACAACTTAACTTCCCTTCATTTAAATCAATATAGAATCAAGACAAGAATAAATAGACTTCAAGTCATAATAATTAAGGATACCCCCCCC	3.071	26.5787
C6_02680W_A-T_552053_552115_63	C6_02680W_A	C6_02680W_A	Ca22chr6A_C_albicans_SC5314	+	ATT	552053-552115	IEFFYWTLMILKLELKKAYFR	ATTGAATTCTTTTATTGGACCCTTATGATTCTTAAATTAGAGTTAAAAAAAGCCTATTTTCGC	14590.3	4951.46
C6_02680W_A-T_552131_552295_165	C6_02680W_A	C6_02680W_A	Ca22chr6A_C_albicans_SC5314	+	ATT	552131-552295	IIIFRRSLFDSSWAYITFSINCLFNHTGVVCIDLMCKEGNNCPLYFQSGVDSNFT	ATTATAATTTTCCGTAGATCGTTGTTTGATAGTAGTTGGGCTTACATTACATTTTCTATAAACTGTTTATTTAATCATACTGGAGTTGTTTGTATAGATTTAATGTGTAAGGAAGGGAATAATTGTCCGTTGTATTTTCAATCTGGTGTTGATTCGAATTTTACT	60.0413	65.993
C6_02680W_B-T_551996_552241_246	C6_02680W_B	C6_02680W_B	Ca22chr6B_C_albicans_SC5314	+	ATT	551996-552241	IEFFYWTLMILKLELKKSLFSLTTIIYIINFRRSLFDSSWAYITFSINCLFNHTGVVCIDLMCKEGINCSLYVQSGVDSNFT	ATTGAATTCTTTTATTGGACCCTTATGATTCTTAAATTAGAGTTAAAAAAAAGCCTATTTTCGCTAACCACGATCATATATATTATAAATTTCCGTAGATCGTTGTTTGATAGTAGTTGGGCTTACATTACATTTTCTATAAACTGTTTATTTAATCATACTGGAGTTGTTTGTATAGATTTAATGTGTAAGGAAGGGATTAATTGTTCGTTGTATGTTCAATCTGGTGTTGATTCGAATTTTACT	2.589	18.8233
C6_02680W_B-T_552031_552090_60	C6_02680W_B	C6_02680W_B	Ca22chr6B_C_albicans_SC5314	+	ATT	552031-552090	IRVKKKPIFANHDHIYYKFP	ATTAGAGTTAAAAAAAAGCCTATTTTCGCTAACCACGATCATATATATTATAAATTTCCG	2.71233	42.4107
C6_02690C_A-T_555886_555957_72	C6_02690C_A	C6_02690C_A	Ca22chr6A_C_albicans_SC5314	-	AAG	555886-555957	KKERGKCHFSRQEKEEKIFGTLTT	AAGAAAGAAAGAGGAAAGTGTCATTTCTCAAGACAAGAAAAAGAAGAGAAAATTTTTGGAACCTTGACCACT	22.001	17.3443
C6_02690C_A-T_555894_555965_72	C6_02690C_A	C6_02690C_A	Ca22chr6A_C_albicans_SC5314	-	ATA	555894-555965	INKRKKEESVISQDKKKKRKFLEP	ATAAATAAAAGAAAGAAAGAGGAAAGTGTCATTTCTCAAGACAAGAAAAAGAAGAGAAAATTTTTGGAACCT	22.001	16.6753
C6_02840C_A-T_588023_588097_75	C6_02840C_A	RBF1	Ca22chr6A_C_albicans_SC5314	-	ATA	588023-588097	ILVVSYCYLRKRGTSPQKTSKRYGL	ATATTGGTTGTTTCATATTGTTATTTAAGAAAGAGAGGCACCTCCCCCCAAAAAACAAGCAAAAGATACGGACTT	5.57533	3.97533
C6_02840C_A-T_588139_588225_87	C6_02840C_A	RBF1	Ca22chr6A_C_albicans_SC5314	-	ATA	588139-588225	IIYFICRIIVYKKKLHQIVCQLEPILKTS	ATAATTTATTTTATTTGCAGGATTATTGTTTACAAAAAAAAATTACACCAGATAGTTTGTCAACTTGAACCAATTTTGAAGACAAGT	4.25	10.3137
C6_02880W_A-T_596294_596380_87	C6_02880W_A	C6_02880W_A	Ca22chr6A_C_albicans_SC5314	+	ATT	596294-596380	IRENYIQLFLNCIQLPLYFFFSQPKRVFD	ATTAGAGAAAATTACATTCAGCTTTTTCTCAATTGTATTCAGCTTCCATTATATTTTTTTTTTTCACAGCCGAAGAGGGTATTTGAT	16.8133	5.088
C6_02940C_A-T_607875_607985_111	C6_02940C_A	C6_02940C_A	Ca22chr6A_C_albicans_SC5314	-	TTG	607875-607985	LLIIFANRYSHQYLISTLPHHTHRQRQIDTDLHRSSQ	TTGTTGATAATTTTTGCTAATAGATATTCTCACCAGTACCTTATCTCAACACTGCCACACCACACACACAGACAGAGACAGATCGACACAGATCTACACAGATCCTCACAG	0.496333	6.42667
C6_03100W_A-T_651830_652012_183	C6_03100W_A	SHE3	Ca22chr6A_C_albicans_SC5314	+	ATT	651830-652012	IWFHLEFNFNINNSLLCCCCILFFPQNISFLRKNITNSKNITNLRFISIRIFKKPVSIQLT	ATTTGGTTTCATTTAGAATTCAATTTCAATATCAATAATTCTTTGCTTTGTTGTTGTTGTATATTGTTCTTCCCCCAAAACATTAGTTTTTTAAGGAAAAATATCACCAATTCAAAAAATATAACCAATCTTAGATTTATAAGTATTAGGATATTTAAGAAACCTGTTTCAATCCAACTTACG	0.739	4.57367
C6_03100W_A-T_652076_652147_72	C6_03100W_A	SHE3	Ca22chr6A_C_albicans_SC5314	+	ATA	652076-652147	IHTQINTLIVYLLFYFFLSSFKRK	ATACACACCCAGATCAACACCCTCATAGTATATCTTTTATTTTATTTTTTTCTTTCTTCGTTTAAAAGAAAA	0	5.058
C6_03100W_A-T_651852_651920_69	C6_03100W_A	SHE3	Ca22chr6A_C_albicans_SC5314	+	ATT	651852-651920	ISISIILCFVVVVYCSSPKTLVF	ATTTCAATATCAATAATTCTTTGCTTTGTTGTTGTTGTATATTGTTCTTCCCCCAAAACATTAGTTTTT	0.399333	6.39833
C6_03100W_A-T_651993_652052_60	C6_03100W_A	SHE3	Ca22chr6A_C_albicans_SC5314	+	CTG	651993-652052	LFQSNLRNTPTSSNIHLIFD	CTGTTTCAATCCAACTTACGTAACACCCCAACCAGTTCCAATATTCATTTAATTTTTGAT	2.392	11.7743
C6_03100W_A-T_652060_652137_78	C6_03100W_A	SHE3	Ca22chr6A_C_albicans_SC5314	+	ATA	652060-652137	ILTSRDTHPDQHPHSISFILFFSFFV	ATATTAACAAGTAGAGATACACACCCAGATCAACACCCTCATAGTATATCTTTTATTTTATTTTTTTCTTTCTTCGTT	0	5.049
C6_03370W_A-T_709504_709638_135	C6_03370W_A	C6_03370W_A	Ca22chr6A_C_albicans_SC5314	+	ATT	709504-709638	ISSKFGVSSSYYYYLITLRLSATPIVIVPIRIEFKTFYTKKAEKY	ATTTCGTCAAAGTTTGGTGTATCGTCGTCTTATTATTACTACCTGATTACACTACGATTATCTGCTACTCCTATAGTAATAGTTCCTATCAGAATAGAATTTAAAACATTCTACACCAAGAAGGCTGAAAAATAT	3.455	29.426
C6_03370W_A-T_709642_709743_102	C6_03370W_A	C6_03370W_A	Ca22chr6A_C_albicans_SC5314	+	TTG	709642-709743	LINNNIQILVFLLLFPPPINFIKLYFITESRKIY	TTGATAAATAATAATATACAAATACTAGTATTTCTTCTTCTTTTTCCTCCACCAATCAATTTTATCAAATTATATTTCATTACAGAAAGCAGAAAGATTTAC	0.351667	2.91133
C6_03370W_A-T_709816_709890_75	C6_03370W_A	C6_03370W_A	Ca22chr6A_C_albicans_SC5314	+	ATT	709816-709890	IYSPSYSYQLFSNPLHPKKKKRRKQ	ATTTACTCCCCCTCCTACTCGTATCAACTTTTTTCTAACCCCCTTCACCCAAAAAAAAAAAAAAGACGAAAGCAA	28.4643	33.4497
C6_03370W_A-T_709903_710016_114	C6_03370W_A	C6_03370W_A	Ca22chr6A_C_albicans_SC5314	+	ATA	709903-710016	INTKPIINNKYLSIFHSFPFLLNLKHILIFTHFLLFID	ATAAATACAAAACCAATTATCAACAACAAATATTTATCTATTTTCCATTCCTTTCCTTTCTTATTGAATTTGAAACATATTCTTATCTTCACCCATTTTTTGTTGTTCATTGAT	5.92933	1.17033
C6_03370W_A-T_709700_709894_195	C6_03370W_A	C6_03370W_A	Ca22chr6A_C_albicans_SC5314	+	ATT	709700-709894	ILSNYISLQKAERFTKLYFVIEFPKKKHLTTKRKRETISFTPPPTRINFFLTPFTQKKKKDESNK	ATTTTATCAAATTATATTTCATTACAGAAAGCAGAAAGATTTACTAAATTATATTTTGTCATTGAATTTCCTAAAAAAAAACATCTCACTACTAAGAGAAAGAGAGAGACTATTTCATTTACTCCCCCTCCTACTCGTATCAACTTTTTTCTAACCCCCTTCACCCAAAAAAAAAAAAAAGACGAAAGCAATAAA	14.1603	15.4117
C6_03370W_A-T_709497_709604_108	C6_03370W_A	C6_03370W_A	Ca22chr6A_C_albicans_SC5314	+	ATA	709497-709604	IYNFVKVWCIVVLLLLPDYTTIICYSYSNSSYQNRI	ATATACAATTTCGTCAAAGTTTGGTGTATCGTCGTCTTATTATTACTACCTGATTACACTACGATTATCTGCTACTCCTATAGTAATAGTTCCTATCAGAATAGAATT	2.99	30.7733
C6_03370W_A-T_709671_709850_180	C6_03370W_A	C6_03370W_A	Ca22chr6A_C_albicans_SC5314	+	ATT	709671-709850	ISSSFSSTNQFYQIIFHYRKQKDLLNYILSLNFLKKNISLLRERERLFHLLPLLLVSTFF	ATTTCTTCTTCTTTTTCCTCCACCAATCAATTTTATCAAATTATATTTCATTACAGAAAGCAGAAAGATTTACTAAATTATATTTTGTCATTGAATTTCCTAAAAAAAAACATCTCACTACTAAGAGAAAGAGAGAGACTATTTCATTTACTCCCCCTCCTACTCGTATCAACTTTTTTC	12.7523	13.4253
C6_03370W_A-T_709878_710012_135	C6_03370W_A	C6_03370W_A	Ca22chr6A_C_albicans_SC5314	+	AAG	709878-710012	KTKAINKINKYKTNYQQQIFIYFPFLSFLIEFETYSYLHPFFVVH	AAGACGAAAGCAATAAATAAGATAAATAAATACAAAACCAATTATCAACAACAAATATTTATCTATTTTCCATTCCTTTCCTTTCTTATTGAATTTGAAACATATTCTTATCTTCACCCATTTTTTGTTGTTCAT	8.19167	6.86233
C6_03380W_A-T_711925_711990_66	C6_03380W_A	C6_03380W_A	Ca22chr6A_C_albicans_SC5314	+	ATA	711925-711990	IRKSISSINIHLKITTYNFLIP	ATAAGAAAATCTATTTCATCGATTAACATCCACCTTAAAATCACAACATATAACTTTCTTATCCCC	15.9573	7.60533
C6_03380W_A-T_711974_712033_60	C6_03380W_A	C6_03380W_A	Ca22chr6A_C_albicans_SC5314	+	ATA	711974-712033	ITFLSPEHQSINQFIFINFN	ATAACTTTCTTATCCCCTGAACATCAATCAATCAATCAATTCATCTTTATAAATTTTAAT	19.5607	5.24967
C6_03380W_B-T_711890_711955_66	C6_03380W_B	C6_03380W_B	Ca22chr6B_C_albicans_SC5314	+	ATA	711890-711955	IRKSISSINIHLKITTSNLLIP	ATAAGAAAATCTATTTCATCGATTAACATCCACCTTAAAATCACAACATCTAACTTACTTATCCCC	1.67	8.30467
C6_03960W_A-T_857259_857345_87	C6_03960W_A	C6_03960W_A	Ca22chr6A_C_albicans_SC5314	+	AGG	857259-857345	RRTIKFRLFLLIHLKLKLTTLPLLILFPP	AGGAGAACAATTAAGTTTCGATTGTTTCTTTTAATTCATTTGAAACTTAAATTAACAACTCTGCCTTTGCTAATTCTATTCCCACCG	2.54867	5.92833
C6_04060W_A-T_880985_881047_63	C6_04060W_A	C6_04060W_A	Ca22chr6A_C_albicans_SC5314	+	ATA	880985-881047	IKLLKNLLLMQMLLKVHKRVF	ATAAAACTGTTGAAAAATTTATTATTGATGCAAATGCTATTGAAAGTCCACAAAAGAGTTTTT	15.5803	3.48667
C6_04270W_A-T_938858_938980_123	C6_04270W_A	CDC39	Ca22chr6A_C_albicans_SC5314	+	CTG	938858-938980	LIRSHIPLQQSTKQTNKQSYRFRSFFLFSQHNEEDFTNCQF	CTGATTAGATCTCATATACCACTACAACAATCAACCAAACAAACAAACAAACAAAGTTATAGATTTAGATCATTTTTTTTATTTTCCCAACACAACGAGGAGGACTTTACTAATTGCCAATTT	0.291667	10.0793
C6_04270W_A-T_939002_939109_108	C6_04270W_A	CDC39	Ca22chr6A_C_albicans_SC5314	+	TTG	939002-939109	LIYIPIVDHHEVTSPPSSIYHQLKRKKNHLELTPQL	TTGATTTATATTCCTATAGTTGATCACCACGAAGTTACATCGCCCCCCTCTTCGATCTATCATCAATTGAAAAGAAAAAAAAATCACCTTGAACTAACACCTCAACTG	4.36633	5.975
C6_04270W_A-T_938871_939002_132	C6_04270W_A	CDC39	Ca22chr6A_C_albicans_SC5314	+	ATA	938871-939002	IYHYNNQPNKQTNKVIDLDHFFYFPNTTRRTLLIANFNPFYPFD	ATATACCACTACAACAATCAACCAAACAAACAAACAAACAAAGTTATAGATTTAGATCATTTTTTTTATTTTCCCAACACAACGAGGAGGACTTTACTAATTGCCAATTTTAATCCTTTTTATCCGTTTGAT	0.271667	9.08333
C6_04270W_A-T_939498_939563_66	C6_04270W_A	CDC39	Ca22chr6A_C_albicans_SC5314	+	TTG	939498-939563	LIYCLFIYPSYLTPKPLILLNL	TTGATTTATTGTTTATTCATTTATCCAAGTTATTTGACACCAAAGCCATTGATATTATTGAATTTG	7.146	3.96333
C6_04270W_A-T_939676_939771_96	C6_04270W_A	CDC39	Ca22chr6A_C_albicans_SC5314	+	ATT	939676-939771	IKIFKISRIPCKLQLGIIIRLYIKHSIFPIHS	ATTAAAATCTTTAAGATCTCAAGAATTCCCTGCAAACTACAACTGGGTATTATTATTAGATTGTATATTAAACACTCCATTTTTCCCATTCATTCA	2.463	2.504
C6_04290W_A-T_947978_948103_126	C6_04290W_A	C6_04290W_A	Ca22chr6A_C_albicans_SC5314	+	ATC	947978-948103	IIIIKERVCLSYCVLFLTLDHFILQKGFFVLFYFHFVLFFFF	ATCATCATCATCAAGGAAAGAGTGTGTTTATCCTATTGTGTTTTGTTTTTAACATTAGATCATTTTATTTTGCAAAAAGGGTTTTTCGTTTTATTTTATTTTCATTTTGTTCTGTTTTTTTTTTTT	0.874667	15.9247
C6_04290W_A-T_947934_948026_93	C6_04290W_A	C6_04290W_A	Ca22chr6A_C_albicans_SC5314	+	ATT	947934-948026	IIHCFYSSHNNIIYPSSSSRKECVYPIVFCF	ATTATTCATTGTTTTTATTCATCTCATAACAATATCATTTACCCATCATCATCATCAAGGAAAGAGTGTGTTTATCCTATTGTGTTTTGTTTT	1.57067	22.0133
C6_04290W_A-T_947941_948123_183	C6_04290W_A	C6_04290W_A	Ca22chr6A_C_albicans_SC5314	+	ATT	947941-948123	IVFIHLITISFTHHHHQGKSVFILLCFVFNIRSFYFAKRVFRFILFSFCSVFFFLNYNLNF	ATTGTTTTTATTCATCTCATAACAATATCATTTACCCATCATCATCATCAAGGAAAGAGTGTGTTTATCCTATTGTGTTTTGTTTTTAACATTAGATCATTTTATTTTGCAAAAAGGGTTTTTCGTTTTATTTTATTTTCATTTTGTTCTGTTTTTTTTTTTTTGAATTACAATCTTAATTTT	0.798333	11.673
C7_00240W_A-T_33654_33764_111	C7_00240W_A	C7_00240W_A	Ca22chr7A_C_albicans_SC5314	+	ATT	33654-33764	IKTYKKKVHTYIAFLLEYTCIIHFSIISSTCPSPEQV	ATTAAAACATACAAAAAAAAAGTACATACATACATAGCATTCTTGTTAGAATATACTTGCATAATTCATTTCTCAATTATTAGTTCGACTTGCCCATCCCCAGAACAAGTA	0	3.72067
C7_00240W_A-T_33547_33606_60	C7_00240W_A	C7_00240W_A	Ca22chr7A_C_albicans_SC5314	+	AAG	33547-33606	KRLVSQKHRKHLPHSVSVYH	AAGCGGCTAGTTTCACAAAAGCATCGCAAACACCTTCCTCATTCGGTAAGTGTTTACCAT	9.323	1.66767
C7_00370W_A-T_60088_60165_78	C7_00370W_A	DCC1	Ca22chr7A_C_albicans_SC5314	+	AGG	60088-60165	RLILDEGGFFYKYFVVEFKILYLKVF	AGGCTTATTTTGGATGAGGGTGGTTTTTTTTATAAGTATTTTGTAGTTGAATTTAAAATTTTGTACCTTAAAGTCTTT	8.66367	7.21067
C7_00440C_A-T_74316_74408_93	C7_00440C_A	GBP2	Ca22chr7A_C_albicans_SC5314	-	AAG	74316-74408	KLQSIYSFRIVYIFLVLFSLLIVGDNGWDGH	AAGCTACAGAGTATCTACTCTTTTAGAATTGTTTATATCTTTTTAGTGTTGTTCTCATTATTAATAGTTGGTGACAATGGATGGGATGGACAT	8.337	35.4177
C7_00440C_A-T_74205_74303_99	C7_00440C_A	GBP2	Ca22chr7A_C_albicans_SC5314	-	AAG	74205-74303	KSMLNMIFFFVYIKRINDWEISSMVTNNVCLWS	AAGAGTATGTTGAACATGATTTTTTTTTTTGTATATATTAAACGGATTAATGATTGGGAAATTTCCAGTATGGTAACAAATAACGTGTGCTTATGGTCT	3.95133	22.212
C7_00440C_A-T_74366_74443_78	C7_00440C_A	GBP2	Ca22chr7A_C_albicans_SC5314	-	TTG	74366-74443	LLEFCIEIYNIESYRVSTLLELFISF	TTGTTGGAATTCTGTATTGAAATTTATAATATCGAAAGCTACAGAGTATCTACTCTTTTAGAATTGTTTATATCTTTT	0.813333	35.5903
C7_00440C_A-T_74266_74328_63	C7_00440C_A	GBP2	Ca22chr7A_C_albicans_SC5314	-	ATG	74266-74328	MGWTLMIIQEYVEHDFFFCIY	ATGGGATGGACATTGATGATTATTCAAGAGTATGTTGAACATGATTTTTTTTTTTGTATATAT	11.6407	38.3083
C7_00440C_A-T_74143_74217_75	C7_00440C_A	GBP2	Ca22chr7A_C_albicans_SC5314	-	GTG	74143-74217	VLMVLNKGCGYLGYCFLLKNFGKAY	GTGCTTATGGTCTTAAATAAAGGGTGTGGGTATTTGGGCTATTGCTTTTTGTTGAAGAATTTTGGTAAGGCTTAT	0	1.78533
C7_00660W_A-T_115630_115695_66	C7_00660W_A	GAC1	Ca22chr7A_C_albicans_SC5314	+	TTG	115630-115695	LFSSIIIEIRTLNTRQKKRTKK	TTGTTTAGTAGTATAATTATAGAGATAAGAACTCTAAACACAAGACAAAAAAAGAGAACAAAGAAA	0	19.807
C7_00660W_A-T_115514_115582_69	C7_00660W_A	GAC1	Ca22chr7A_C_albicans_SC5314	+	TTG	115514-115582	LLYIYIINNHHPSSLLLLLLLPQ	TTGTTGTACATATATATCATTAACAACCACCACCCATCATCACTACTACTACTACTATTACTACCACAG	1.99667	10.4313
C7_00660W_A-T_115434_115634_201	C7_00660W_A	GAC1	Ca22chr7A_C_albicans_SC5314	+	ATC	115434-115634	IISHSSCFYNVTFFTRSPSRFEKEEIHCCTYISLTTTTHHHYYYYYYYHSNNQSYLFLATIITVSFV	ATCATTTCACACTCCTCTTGTTTTTACAACGTAACATTTTTCACACGCTCCCCTTCAAGGTTTGAAAAAGAGGAAATACATTGTTGTACATATATATCATTAACAACCACCACCCATCATCACTACTACTACTACTATTACTACCACAGTAACAACCAAAGCTACTTGTTCTTAGCAACAATAATAACAGTTTCCTTTGTT	8.60667	8.83033
C7_00660W_A-T_115656_115757_102	C7_00660W_A	GAC1	Ca22chr7A_C_albicans_SC5314	+	AAG	115656-115757	KNSKHKTKKENKEIESQIFSTLIFHSPIQTHLLL	AAGAACTCTAAACACAAGACAAAAAAAGAGAACAAAGAAATAGAAAGCCAAATATTTTCTACACTTATCTTTCACAGTCCTATACAGACACATTTATTATTA	0	13.4337
C7_00930W_A-T_194766_194837_72	C7_00930W_A	GPH1	Ca22chr7A_C_albicans_SC5314	+	TTG	194766-194837	LNRDYLLYFTLLFFFVYQSRLDIA	TTGAATAGAGACTATTTGCTTTACTTTACCTTGCTTTTTTTTTTCGTTTATCAGTCACGTCTTGATATTGCA	3.444	34.6577
C7_00930W_A-T_194677_194766_90	C7_00930W_A	GPH1	Ca22chr7A_C_albicans_SC5314	+	CTG	194677-194766	LLFLFHSLFTKKRVIRIYNIIFKATLQVIT	CTGTTGTTTCTTTTCCACAGTTTGTTTACAAAAAAAAGAGTCATTAGAATCTATAATATTATTTTTAAAGCAACGTTACAAGTGATAACT	37.409	128.905
C7_00930W_A-T_194770_194931_162	C7_00930W_A	GPH1	Ca22chr7A_C_albicans_SC5314	+	ATA	194770-194931	IETICFTLPCFFFSFISHVLILHSTITHNKIQTTPESPFSFWNFYFFEVTFFLL	ATAGAGACTATTTGCTTTACTTTACCTTGCTTTTTTTTTTCGTTTATCAGTCACGTCTTGATATTGCATAGTACTATTACCCACAATAAAATTCAAACTACCCCCGAGTCACCGTTTTCTTTTTGGAATTTTTATTTTTTTGAGGTTACTTTTTTCTTGCTT	1.02033	14.5367
C7_00930W_A-T_194947_195054_108	C7_00930W_A	GPH1	Ca22chr7A_C_albicans_SC5314	+	ATT	194947-195054	IELNCDFLLPYQAFSLEIFIYSYYFQVTFLYSYRSN	ATTGAATTGAATTGTGACTTTCTTCTTCCCTATCAAGCATTTTCCTTAGAAATTTTTATTTACAGTTATTATTTTCAGGTAACGTTTTTATACAGTTATAGATCTAAT	0	6.878
C7_00930W_A-T_194837_194953_117	C7_00930W_A	GPH1	Ca22chr7A_C_albicans_SC5314	+	ATA	194837-194953	IVLLPTIKFKLPPSHRFLFGIFIFLRLLFSCFEFEFELN	ATAGTACTATTACCCACAATAAAATTCAAACTACCCCCGAGTCACCGTTTTCTTTTTGGAATTTTTATTTTTTTGAGGTTACTTTTTTCTTGCTTTGAATTTGAATTTGAATTGAAT	1.884	4.76967
C7_01410C_A-T_291535_291789_255	C7_01410C_A	NBP2	Ca22chr7A_C_albicans_SC5314	-	AAG	291535-291789	KRSQKKKIILLFNQQQHYQVLSLSHITILIPHTSHFIYYLYPHIIQVYWYLFFRCFTLFSVHSFIHSFLSLFFLSCLSCVCVCVC	AAGAGAAGCCAAAAAAAAAAAATCATCCTTCTTTTTAATCAACAACAACATTATCAAGTTTTATCTTTATCTCATATTACAATATTAATTCCACACACTTCACATTTTATATATTACTTATATCCACATATAATACAGGTATATTGGTATCTTTTTTTTAGGTGTTTCACATTATTCTCCGTTCACTCATTCATTCATTCATTCTTGAGTCTTTTTTTTTTGTCTTGTTTGTCCTGTGTGTGTGTGTGTGTGTGT	1.56567	1.298
C7_01470C_A-T_309981_310112_132	C7_01470C_A	PRE10	Ca22chr7A_C_albicans_SC5314	-	CTG	309981-310112	LIYRLQLVQVTIYPTVFSHQVCNQIKLNIIIFCPILLLQYTNYI	CTGATTTATAGACTTCAATTGGTACAGGTTACGATTTATCCAACAGTGTTTTCTCACCAGGTATGTAATCAAATCAAATTAAATATTATTATTTTTTGCCCTATCCTGTTATTGCAGTATACTAACTATATA	3.49067	4.49667
C7_01470C_A-T_310112_310174_63	C7_01470C_A	PRE10	Ca22chr7A_C_albicans_SC5314	-	ATC	310112-310174	IYIMVCQFVTTKHNALLMYTN	ATCTATATCATGGTATGTCAATTTGTTACAACTAAACACAATGCATTGCTCATGTATACTAAC	3.38733	93.1393
C7_01470C_A-T_310034_310105_72	C7_01470C_A	PRE10	Ca22chr7A_C_albicans_SC5314	-	ATA	310034-310105	IDFNWYRLRFIQQCFLTRYVIKSN	ATAGACTTCAATTGGTACAGGTTACGATTTATCCAACAGTGTTTTCTCACCAGGTATGTAATCAAATCAAAT	6.399	7.884
C7_01470C_A-T_310105_310188_84	C7_01470C_A	PRE10	Ca22chr7A_C_albicans_SC5314	-	ATA	310105-310188	ITNILSISWYVNLLQLNTMHCSCILTDL	ATAACTAATATTTTATCTATATCATGGTATGTCAATTTGTTACAACTAAACACAATGCATTGCTCATGTATACTAACTGATTTA	2.54033	69.8547
C7_01800C_A-T_388817_388933_117	C7_01800C_A	PFK2	Ca22chr7A_C_albicans_SC5314	-	TTG	388817-388933	LLFLNFQIYFFPLVSSLLQYSINSFLNKKLYIFTTIESS	TTGCTTTTTTTGAATTTCCAAATATATTTTTTCCCTCTTGTTTCCTCCCTCCTCCAATATTCAATTAATTCTTTTTTAAACAAGAAATTATATATATTTACTACAATTGAATCCTCA	2.47533	24.2627
C7_01800C_A-T_388858_388920_63	C7_01800C_A	PFK2	Ca22chr7A_C_albicans_SC5314	-	ATT	388858-388920	ISKYIFSLLFPPSSNIQLILF	ATTTCCAAATATATTTTTTCCCTCTTGTTTCCTCCCTCCTCCAATATTCAATTAATTCTTTTT	2.71533	28.4877
C7_01840W_A-T_393804_393866_63	C7_01840W_A	IQG1	Ca22chr7A_C_albicans_SC5314	+	ACG	393804-393866	TLQFRFCQHNNHCTNKTKHIR	ACGCTTCAGTTTAGGTTCTGTCAGCACAATAATCACTGCACCAACAAAACGAAGCATATAAGG	0	1.949
C7_01840W_A-T_393721_393861_141	C7_01840W_A	IQG1	Ca22chr7A_C_albicans_SC5314	+	AGG	393721-393861	REEKKRIHIITSPISEYRKIGSLLSILARFSLGSVSTIITAPTKRSI	AGGGAAGAGAAAAAGAGGATACACATAATAACTTCACCTATATCGGAGTATAGGAAGATCGGTTCCTTACTCTCAATTTTGGCACGCTTCAGTTTAGGTTCTGTCAGCACAATAATCACTGCACCAACAAAACGAAGCATA	0.645	1.13367
C7_01900W_A-T_406624_406686_63	C7_01900W_A	NUC2	Ca22chr7A_C_albicans_SC5314	+	ATA	406624-406686	ITFYIYYFNSHIPIYTLTPIG	ATAACATTTTATATTTATTATTTTAATTCACATATTCCTATATATACACTGACACCCATTGGT	16.762	26.349
C7_01900W_A-T_406542_406646_105	C7_01900W_A	NUC2	Ca22chr7A_C_albicans_SC5314	+	AAG	406542-406646	KNIKPISITNQLTYNTCPNSSPPPFYNILYLLF	AAGAATATTAAACCAATCAGTATAACCAACCAATTAACCTACAACACTTGTCCCAACTCATCCCYTTYCCCCCCCCCCTTCTATAACATTTTATATTTATTATTT	1.04967	4.02833
C7_01920W_A-T_410742_410813_72	C7_01920W_A	CDC34	Ca22chr7A_C_albicans_SC5314	+	ATC	410742-410813	IFLTCSILLYSSPPPFCTTTTTIS	ATCTTTCTTACGTGCTCTATCTTGTTGTATTCATCACCACCGCCCTTCTGTACTACTACGACCACTATCAGT	0	4.913
C7_01920W_A-T_410823_411035_213	C7_01920W_A	CDC34	Ca22chr7A_C_albicans_SC5314	+	ATT	410823-411035	ILLFSNNNNKRNQAKKRKKEIKTGNHQVRERQKKIYIDYTQRQKNDYKYILLPSRTTSINISILASSLPSK	ATTTTATTGTTTTCCAATAACAACAACAAAAGAAATCAAGCAAAAAAAAGAAAAAAAGAAATCAAAACAGGAAACCACCAAGTGAGGGAGAGACAGAAAAAAATTTATATAGATTACACACAGAGACAAAAAAACGATTACAAATACATTTTACTTCCTTCACGAACAACTTCTATTAACATAAGCATTTTAGCATCATCACTCCCATCCAAG	4.355	24.4623
C7_01920W_A-T_410770_410904_135	C7_01920W_A	CDC34	Ca22chr7A_C_albicans_SC5314	+	ATT	410770-410904	IHHHRPSVLLRPLSVSITFYCFPITTTKEIKQKKEKKKSKQETTK	ATTCATCACCACCGCCCTTCTGTACTACTACGACCACTATCAGTTAGTATCACATTTTATTGTTTTCCAATAACAACAACAAAAGAAATCAAGCAAAAAAAAGAAAAAAAGAAATCAAAACAGGAAACCACCAAG	0	27.9863
C7_01920W_A-T_410935_411003_69	C7_01920W_A	CDC34	Ca22chr7A_C_albicans_SC5314	+	ATT	410935-411003	ITHRDKKTITNTFYFLHEQLLLT	ATTACACACAGAGACAAAAAAACGATTACAAATACATTTTACTTCCTTCACGAACAACTTCTATTAACA	1.59733	14.336
C7_01920W_A-T_410738_410839_102	C7_01920W_A	CDC34	Ca22chr7A_C_albicans_SC5314	+	ATT	410738-410839	INLSYVLYLVVFITTALLYYYDHYQLVSHFIVFQ	ATTAATCTTTCTTACGTGCTCTATCTTGTTGTATTCATCACCACCGCCCTTCTGTACTACTACGACCACTATCAGTTAGTATCACATTTTATTGTTTTCCAA	0	3.577
C7_01920W_A-T_410852_410998_147	C7_01920W_A	CDC34	Ca22chr7A_C_albicans_SC5314	+	AAG	410852-410998	KKSSKKKKKRNQNRKPPSEGETEKNLYRLHTETKKRLQIHFTSFTNNFY	AAGAAATCAAGCAAAAAAAAGAAAAAAAGAAATCAAAACAGGAAACCACCAAGTGAGGGAGAGACAGAAAAAAATTTATATAGATTACACACAGAGACAAAAAAACGATTACAAATACATTTTACTTCCTTCACGAACAACTTCTAT	6.12267	32.7263
C7_01950W_A-T_418321_418407_87	C7_01950W_A	C7_01950W_A	Ca22chr7A_C_albicans_SC5314	+	AAG	418321-418407	KTTRTCGNTRVWKHIELSRTENINPSQKN	AAGACAACGCGTACTTGTGGCAATACAAGAGTTTGGAAGCACATTGAATTATCAAGAACTGAGAATATAAACCCATCACAAAAGAAT	6.36767	66.7907
C7_01950W_A-T_418310_418387_78	C7_01950W_A	C7_01950W_A	Ca22chr7A_C_albicans_SC5314	+	ATT	418310-418387	INHQRQRVLVAIQEFGSTLNYQELRI	ATTAACCACCAAAGACAACGCGTACTTGTGGCAATACAAGAGTTTGGAAGCACATTGAATTATCAAGAACTGAGAATA	4.62967	73.3157
C7_01950W_A-T_418293_418364_72	C7_01950W_A	C7_01950W_A	Ca22chr7A_C_albicans_SC5314	+	TTG	418293-418364	LKTRKKLTTKDNAYLWQYKSLEAH	TTGAAGACCCGAAAGAAATTAACCACCAAAGACAACGCGTACTTGTGGCAATACAAGAGTTTGGAAGCACAT	6.92867	65.981
C7_02470C_A-T_533024_533083_60	C7_02470C_A	C7_02470C_A	Ca22chr7A_C_albicans_SC5314	-	ATT	533024-533083	IGFYYPFLLQWYWWDFSDLI	ATTGGGTTTTATTACCCATTTCTGTTGCAATGGTATTGGTGGGACTTCTCAGATCTAATA	13.1643	2.82433
C7_02470C_A-T_532946_533017_72	C7_02470C_A	C7_02470C_A	Ca22chr7A_C_albicans_SC5314	-	ATT	532946-533017	IYSNHNQNWKTTRIYVRGMFRSFL	ATTTACTCCAACCACAACCAAAATTGGAAAACTACAAGAATTTACGTGAGAGGTATGTTTAGAAGTTTTTTG	2.58133	3.99367
C7_02470C_A-T_533029_533106_78	C7_02470C_A	C7_02470C_A	Ca22chr7A_C_albicans_SC5314	-	ATT	533029-533106	ITRSSIEVLGFITHFCCNGIGGTSQI	ATTACTAGATCCTCAATTGAAGTATTGGGTTTTATTACCCATTTCTGTTGCAATGGTATTGGTGGGACTTCTCAGATC	10.1263	2.64767
C7_02470C_A-T_532959_533135_177	C7_02470C_A	C7_02470C_A	Ca22chr7A_C_albicans_SC5314	-	ATT	532959-533135	IPILMITPDLLLDPQLKYWVLLPISVAMVLVGLLRSNITYLLQPQPKLENYKNLRERYV	ATTCCCATACTTATGATTACCCCAGATTTATTACTAGATCCTCAATTGAAGTATTGGGTTTTATTACCCATTTCTGTTGCAATGGTATTGGTGGGACTTCTCAGATCTAATATAACATATTTACTCCAACCACAACCAAAATTGGAAAACTACAAGAATTTACGTGAGAGGTATGTT	5.668	3.147
C7_02630W_A-T_560507_560569_63	C7_02630W_A	C7_02630W_A	Ca22chr7A_C_albicans_SC5314	+	ATC	560507-560569	IIYHLFISKHTVSDFNAPFLT	ATCATTTATCATTTGTTCATCTCAAAACACACTGTATCTGATTTCAACGCACCCTTTTTAACT	3.926	84.2463
C7_02630W_A-T_560376_560564_189	C7_02630W_A	C7_02630W_A	Ca22chr7A_C_albicans_SC5314	+	ATC	560376-560564	IFEFHVFHKSNNSNSNSNSNSNSNSNNSNNIFNKHNNPLTSYHLSFIICSSQNTLYLISTHPF	ATCTTTGAATTTCATGTTTTCCATAAAAGCAACAACAGCAACAGCAACAGCAACAGCAACAGCAACAGCAACAGCAACAACAGCAACAACATTTTCAATAAACACAATAACCCCTTAACTTCTTATCATTTATCATTTATCATTTGTTCATCTCAAAACACACTGTATCTGATTTCAACGCACCCTTTT	0.379667	28.533
C7_02890C_A-T_627301_627396_96	C7_02890C_A	PMT1	Ca22chr7A_C_albicans_SC5314	-	AGG	627301-627396	RSIYSAPPHSTSYRLSFTQLKQIFIFLFLFLF	AGGTCAATTTATAGCGCCCCCCCTCACTCCACCTCCTACCGTCTTTCTTTCACGCAACTAAAACAAATTTTTATATTTTTATTTTTATTTTTATTT	1.60833	48.5683
C7_02890C_A-T_627339_627404_66	C7_02890C_A	PMT1	Ca22chr7A_C_albicans_SC5314	-	TTG	627339-627404	LNKGQFIAPPLTPPPTVFLSRN	TTGAATAAAGGTCAATTTATAGCGCCCCCCCTCACTCCACCTCCTACCGTCTTTCTTTCACGCAAC	2.33967	62.055
C7_02910W_A-T_629448_629510_63	C7_02910W_A	ENA21	Ca22chr7A_C_albicans_SC5314	+	ATA	629448-629510	ILVYFLVFIIVLLVFENKRRY	ATACTCGTCTACTTCCTTGTATTTATCATTGTTTTATTAGTATTTGAAAATAAACGGCGCTAC	7.61333	12.748
C7_02910W_A-T_629332_629484_153	C7_02910W_A	ENA21	Ca22chr7A_C_albicans_SC5314	+	TTG	629332-629484	LQHQPSNCFRLNIPIQSIAYTHTHRQTFYLFEYIFRVLQYSSTSLYLSLFY	TTGCAACATCAACCATCAAATTGCTTTAGATTAAATATTCCAATCCAATCTATTGCATACACACACACACACAGACAAACTTTTTATTTATTTGAGTATATTTTCAGAGTTCTACAATACTCGTCTACTTCCTTGTATTTATCATTGTTTTAT	1.29833	6.84433
C7_02910W_A-T_629366_629491_126	C7_02910W_A	ENA21	Ca22chr7A_C_albicans_SC5314	+	ATA	629366-629491	IFQSNLLHTHTHTDKLFIYLSIFSEFYNTRLLPCIYHCFISI	ATATTCCAATCCAATCTATTGCATACACACACACACACAGACAAACTTTTTATTTATTTGAGTATATTTTCAGAGTTCTACAATACTCGTCTACTTCCTTGTATTTATCATTGTTTTATTAGTATT	1.007	4.97033
C7_02910W_A-T_629501_629599_99	C7_02910W_A	ENA21	Ca22chr7A_C_albicans_SC5314	+	ACG	629501-629599	TALLKLTRKMALLLVRAMKMKAVRNRYMIILKI	ACGGCGCTACTAAAATTAACGAGAAAAATGGCTCTTCTGTTAGTGAGAGCTATGAAAATGAAAGCAGTAAGAAATCGATATATGATAATACTCAAAATA	3.842	1.45967
C7_03010W_A-T_652939_653070_132	C7_03010W_A	C7_03010W_A	Ca22chr7A_C_albicans_SC5314	+	AAG	652939-653070	KKEDSYLIYFFLFAFNCFPPTHHPSLLLQLLITSIIIINSNNNY	AAGAAAGAAGATTCATATTTAATTTACTTCTTTCTTTTTGCTTTTAATTGTTTTCCACCCACCCACCACCCCTCTCTATTACTACAACTACTAATAACTAGTATTATTATTATTAATAGCAATAATAATTAT	11.5233	2.17833
C7_03010W_A-T_653305_653397_93	C7_03010W_A	C7_03010W_A	Ca22chr7A_C_albicans_SC5314	+	ATT	653305-653397	IFFFLRTICLIEVEFERYIQVTLIYPAFALI	ATTTTCTTTTTTTTAAGAACTATTTGTTTAATTGAAGTTGAATTTGAAAGATATATCCAAGTTACACTGATATACCCTGCTTTTGCATTGATA	0.592667	15.9127
C7_03010W_A-T_653070_653150_81	C7_03010W_A	C7_03010W_A	Ca22chr7A_C_albicans_SC5314	+	TTG	653070-653150	LKLKVQNSWIYYYSTHCRYTFYLIYCY	TTGAAACTAAAAGTTCAAAACAGTTGGATCTATTATTACTCAACCCACTGTCGTTACACTTTTTATTTAATTTATTGCTAT	0.783	0.915
C7_03270W_A-T_710492_710557_66	C7_03270W_A	C7_03270W_A	Ca22chr7A_C_albicans_SC5314	+	ATT	710492-710557	ILFLFLFLLLASFFLFFYLLFN	ATTTTGTTTCTGTTCCTATTCCTGTTACTGGCTTCCTTTTTTTTGTTTTTTTATTTATTATTCAAT	2.21367	3.14433
C7_03270W_A-T_710463_710564_102	C7_03270W_A	C7_03270W_A	Ca22chr7A_C_albicans_SC5314	+	ATT	710463-710564	ILFLVNLFVLFCFCSYSCYWLPFFCFFIYYSIKF	ATTTTATTTTTGGTTAATCTTTTTGTTTTATTTTGTTTCTGTTCCTATTCCTGTTACTGGCTTCCTTTTTTTTGTTTTTTTATTTATTATTCAATTAAATTT	2.48767	2.03433
C7_03270W_A-T_710571_710648_78	C7_03270W_A	C7_03270W_A	Ca22chr7A_C_albicans_SC5314	+	ATC	710571-710648	IIRTIFPFVSPFPLCFLTIALYITFN	ATCATTCGGACTATCTTTCCCTTCGTTTCCCCCTTCCCCCTCTGTTTCCTCACAATTGCATTATACATAACTTTCAAT	16.1013	80.337
C7_03270W_A-T_710452_710637_186	C7_03270W_A	C7_03270W_A	Ca22chr7A_C_albicans_SC5314	+	ATT	710452-710637	IILPFYFWLIFLFYFVSVPIPVTGFLFFVFLFIIQLNFDISFGLSFPSFPPSPSVSSQLHYT	ATTATTCTTCCATTTTATTTTTGGTTAATCTTTTTGTTTTATTTTGTTTCTGTTCCTATTCCTGTTACTGGCTTCCTTTTTTTTGTTTTTTTATTTATTATTCAATTAAATTTTGATATATCATTCGGACTATCTTTCCCTTCGTTTCCCCCTTCCCCCTCTGTTTCCTCACAATTGCATTATACA	5.598	27.7103
C7_03270W_B-T_710524_710670_147	C7_03270W_B	C7_03270W_B	Ca22chr7B_C_albicans_SC5314	+	ATT	710524-710670	ILFLFLFLLLASFFFVFLFIIQLNFDISFGLSFPSFPPPPSVSSQLHYT	ATTTTGTTTCTGTTCCTATTCCTGTTACTGGCTTCCTTTTTTTTTGTTTTTTTATTTATTATTCAATTAAATTTTGATATATCATTCGGACTATCTTTCCCTTCGTTTCCCCCTCCCCCCTCTGTTTCCTCACAATTGCATTATACA	3.68767	0.882333
C7_03270W_B-T_710604_710681_78	C7_03270W_B	C7_03270W_B	Ca22chr7B_C_albicans_SC5314	+	ATC	710604-710681	IIRTIFPFVSPSPLCFLTIALYITFN	ATCATTCGGACTATCTTTCCCTTCGTTTCCCCCTCCCCCCTCTGTTTCCTCACAATTGCATTATACATAACTTTCAAT	6.95	1.66267
C7_03380W_A-T_744248_744319_72	C7_03380W_A	C7_03380W_A	Ca22chr7A_C_albicans_SC5314	+	ATA	744248-744319	IRQLLYLITKLTEHLNHFLHHYLT	ATACGACAACTACTATACCTTATTACCAAACTCACTGAACATCTCAACCACTTTTTACATCATTATTTGACT	7.04433	17.826
C7_03380W_A-T_744237_744314_78	C7_03380W_A	C7_03380W_A	Ca22chr7A_C_albicans_SC5314	+	ATA	744237-744314	IDHLYDNYYTLLPNSLNISTTFYIII	ATAGATCATTTATACGACAACTACTATACCTTATTACCAAACTCACTGAACATCTCAACCACTTTTTACATCATTATT	2.333	16.3597
C7_03390C_A-T_745560_745631_72	C7_03390C_A	PUP3	Ca22chr7A_C_albicans_SC5314	-	ATT	745560-745631	IDVYLYSSFPIILTQWTQLNRISQ	ATTGACGTATACTTATATTCATCATTTCCAATAATTCTAACTCAGTGGACCCAATTGAATAGAATATCTCAA	6.63033	4.27167
C7_03390C_B-T_745589_745660_72	C7_03390C_B	C7_03390C_B	Ca22chr7B_C_albicans_SC5314	-	ATT	745589-745660	IDVYLYSSFPIIPTQWTQLNRISQ	ATTGACGTATACTTATATTCATCATTTCCAATAATTCCAACTCAGTGGACCCAATTGAATAGAATATCTCAA	0.498333	2.22
C7_03480W_A-T_770603_770722_120	C7_03480W_A	C7_03480W_A	Ca22chr7A_C_albicans_SC5314	+	TTG	770603-770722	LICLFVFFLKKFNPDFDDNLQDSYTPLPPLTFIHLKVNFK	TTGATTTGTTTATTTGTTTTTTTTTTGAAAAAGTTTAATCCCGATTTTGACGATAATCTTCAAGATAGTTATACCCCCCTTCCTCCCCTCACATTTATTCACCTTAAAGTCAACTTTAAA	14.3947	6.005
C7_03480W_A-T_770640_770771_132	C7_03480W_A	C7_03480W_A	Ca22chr7A_C_albicans_SC5314	+	ATC	770640-770771	IPILTIIFKIVIPPFLPSHLFTLKSTLNKNKTALLQIIQNNFAC	ATCCCGATTTTGACGATAATCTTCAAGATAGTTATACCCCCCTTCCTCCCCTCACATTTATTCACCTTAAAGTCAACTTTAAATAAGAACAAGACAGCATTGTTACAAATTATTCAGAATAATTTTGCGTGT	19.2783	6.526
C7_03480W_B-T_770633_770752_120	C7_03480W_B	C7_03480W_B	Ca22chr7B_C_albicans_SC5314	+	TTG	770633-770752	LICLFVFFLKKFNPDFDDNLQDSYTPLPPLTFIHLKVNFK	TTGATTTGTTTATTTGTTTTTTTTTTAAAAAAGTTTAATCCCGATTTTGACGATAATCTTCAAGATAGTTATACCCCCCTTCCTCCCCTCACGTTTATTCACCTTAAAGTCAACTTTAAA	0	1.624
C7_03480W_B-T_770670_770804_135	C7_03480W_B	C7_03480W_B	Ca22chr7B_C_albicans_SC5314	+	ATC	770670-770804	IPILTIIFKIVIPPFLPSRLFTLKSTLNKNKTALLQIIQNNLRVE	ATCCCGATTTTGACGATAATCTTCAAGATAGTTATACCCCCCTTCCTCCCCTCACGTTTATTCACCTTAAAGTCAACTTTAAATAAGAACAAGACAGCATTGTTACAAATTATTCAGAATAATTTGCGTGTTGAA	0.816333	1.88267
C7_03480W_B-T_770877_770978_102	C7_03480W_B	C7_03480W_B	Ca22chr7B_C_albicans_SC5314	+	GTG	770877-770978	VTENIFLFFLHILYCVVDNFPLPYHNSFKSIINQ	GTGACAGAAAACATTTTCCTTTTTTTTTTACATATCTTGTACTGTGTAGTCGATAATTTTCCACTTCCTTATCATAACAGTTTCAAGTCTATAATTAATCAA	0	1.33433
C7_03630C_A-T_809440_809517_78	C7_03630C_A	TIM9	Ca22chr7A_C_albicans_SC5314	-	TTG	809440-809517	LILYIYITFYFNYLDQKQYITPKWIN	TTGATATTATATATATATATCACATTTTATTTTAACTACTTAGATCAAAAACAATATATAACCCCAAAATGGATCAAT	94.866	22.9307
C7_03630C_A-T_809120_809464_345	C7_03630C_A	TIM9	Ca22chr7A_C_albicans_SC5314	-	ATA	809120-809464	IYNPKMDQLNVKEQQEFQQIVEQKQMKDFMNLYSNLVSRCFDDCVNDFTSNSLTSKETSCIAKCSEKFLKHSERVGQRFQEQKYVDLLRVTNGNMPLMIIIIYHQIILTNKLILL	ATATATAACCCCAAAATGGATCAATTAAACGTTAAAGAACAACAAGAATTTCAACAAATTGTTGAACAAAAACAAATGAAAGATTTCATGAATTTATATTCCAATTTAGTTTCAAGATGTTTTGATGATTGTGTTAATGATTTCACTTCTAATAGTTTAACTTCAAAAGAAACTTCATGTATTGCCAAATGTTCTGAAAAATTCTTGAAACATAGCGAACGTGTTGGTCAAAGATTCCAAGAACAAAAGTATGTTGATTTACTGAGAGTAACAAATGGCAATATGCCTTTGATGATCATTATTATTTATCATCAGATTATACTAACAAATAAACTCATATTATTA	135.717	147.001
C7_03680W_A-T_817109_817171_63	C7_03680W_A	C7_03680W_A	Ca22chr7A_C_albicans_SC5314	+	ATA	817109-817171	IFIYTRMRQSKNQRFVYTDKN	ATATTCATATATACTAGAATGAGACAAAGCAAAAACCAAAGATTCGTGTATACGGACAAGAAT	58.4403	56.7457
C7_03840W_A-T_848665_848724_60	C7_03840W_A	C7_03840W_A	Ca22chr7A_C_albicans_SC5314	+	AGG	848665-848724	RENTITYSNYSLTTTTTNSI	AGGGAAAACACCATTACGTACAGCAATTACTCATTAACAACAACAACAACAAACTCCATA	1.196	8.28733
C7_03940C_A-T_865271_865330_60	C7_03940C_A	CLB4	Ca22chr7A_C_albicans_SC5314	-	ACG	865271-865330	TTVLNLRKLSVSTVLHSLFL	ACGACAGTACTAAACTTACGAAAGCTTTCAGTTTCTACCGTGCTTCACAGCTTGTTCCTT	1.37233	10.407
C7_03940C_A-T_864926_865114_189	C7_03940C_A	CLB4	Ca22chr7A_C_albicans_SC5314	-	AAG	864926-865114	KFNTIKLHSLDFFFVFVTYSKVFNTKNQTNKEISNQTLQREREKKKKIGTKGDKQKKIHFQHI	AAGTTTAACACTATTAAATTACATTCATTAGATTTCTTTTTCGTTTTTGTGACGTACTCCAAGGTCTTTAATACAAAAAACCAAACAAACAAAGAAATAAGCAACCAAACGCTTCAAAGAGAGAGAGAGAAAAAAAAAAAAATAGGCACGAAAGGAGACAAACAAAAAAAAATACATTTTCAACACATC	3.32433	0.941
C7_03940C_A-T_865321_865383_63	C7_03940C_A	CLB4	Ca22chr7A_C_albicans_SC5314	-	ACG	865321-865383	TSFHFKLDTFTVDNTLIKRQY	ACGAGTTTTCATTTTAAACTTGACACCTTCACGGTTGATAATACACTGATCAAACGACAGTAC	1.307	1.47033
C7_03940C_A-T_864868_864963_96	C7_03940C_A	CLB4	Ca22chr7A_C_albicans_SC5314	-	AAG	864868-864963	KETNKKKYIFNTSNNYQQQKVHTNTFITFRFN	AAGGAGACAAACAAAAAAAAATACATTTTCAACACATCTAACAACTATCAACAACAGAAAGTTCACACCAACACGTTCATTACCTTTAGGTTTAAT	5.971	2.862
C7_03940C_A-T_865230_865313_84	C7_03940C_A	CLB4	Ca22chr7A_C_albicans_SC5314	-	ACG	865230-865313	TKAFSFYRASQLVPLDYLDFQLFAIKGK	ACGAAAGCTTTCAGTTTCTACCGTGCTTCACAGCTTGTTCCTTTAGACTATTTGGATTTCCAACTATTTGCTATCAAAGGTAAA	0.427	8.095
C7_04060W_A-T_881467_881553_87	C7_04060W_A	C7_04060W_A	Ca22chr7A_C_albicans_SC5314	+	ATA	881467-881553	IQQIFAQTTTHFFFFHSIRQFLVFLHACV	ATACAACAAATTTTTGCTCAGACAACAACACATTTTTTTTTTTTTCATAGTATCCGTCAATTCTTAGTTTTTCTACATGCATGTGTA	1.04567	1.795
C7_04230W_A-T_918449_918733_285	C7_04230W_A	NRG1	Ca22chr7A_C_albicans_SC5314	+	ACG	918449-918733	TSRLLFSNIIFLFLLLNNLTEVNFLYFNIILNCKKKIEREKKNHQLSYYLQLRIKNIKNNPIISYYILGFVITICFTREPHCSSIFQNLKQVLYK	ACGTCCAGGTTACTATTTTCCAATATTATATTTTTGTTTTTGCTGCTAAATAATTTAACTGAAGTGAATTTTCTTTATTTCAATATTATACTTAATTGCAAAAAAAAAATAGAGAGAGAAAAAAAAAATCATCAGCTTTCTTATTATTTACAACTGAGAATTAAAAATATCAAAAATAATCCTATTATCAGTTATTATATACTAGGATTTGTTATTACAATTTGCTTTACAAGAGAACCTCATTGTTCAAGTATCTTCCAGAATCTGAAACAGGTATTATATAAA	12.6433	12.2483
C7_04230W_A-T_918375_918494_120	C7_04230W_A	NRG1	Ca22chr7A_C_albicans_SC5314	+	ATC	918375-918494	IIIINPSLLSSCLSQTLHIKNCCNKRPGYYFPILYFCFCC	ATCATTATAATTAACCCCTCCTTGCTTTCATCTTGTTTGTCACAGACGTTACACATTAAGAACTGTTGTAATAAACGTCCAGGTTACTATTTTCCAATATTATATTTTTGTTTTTGCTGC	19.8707	48.368
C7_04230W_A-T_918544_918609_66	C7_04230W_A	NRG1	Ca22chr7A_C_albicans_SC5314	+	TTG	918544-918609	LQKKNRERKKKSSAFLLFTTEN	TTGCAAAAAAAAAATAGAGAGAGAAAAAAAAAATCATCAGCTTTCTTATTATTTACAACTGAGAAT	1.25233	36.166
C7_04230W_A-T_918652_918729_78	C7_04230W_A	NRG1	Ca22chr7A_C_albicans_SC5314	+	AGG	918652-918729	RICYYNLLYKRTSLFKYLPESETGII	AGGATTTGTTATTACAATTTGCTTTACAAGAGAACCTCATTGTTCAAGTATCTTCCAGAATCTGAAACAGGTATTATA	44.7843	10.9203
CR_00010C_A-T_8118_8189_72	CR_00010C_A	CR_00010C_A	Ca22chrRA_C_albicans_SC5314	-	ATT	8118-8189	IDCCLETTHNASGIAVRSAMMITQ	ATTGATTGTTGTTTGGAGACTACCCATAATGCTTCTGGTATCGCGGTTCGGTCAGCTATGATGATTACACAA	0.996667	10.918
CR_00010C_A-T_7482_7553_72	CR_00010C_A	CR_00010C_A	Ca22chrRA_C_albicans_SC5314	-	ACG	7482-7553	TNLKTHLSNLETNFWIPHLLRKTG	ACGAATTTGAAGACTCATCTCAGCAATCTAGAGACAAACTTTTGGATTCCTCACCTCTTAAGGAAAACAGGC	0	6.07567
CR_00010C_A-T_8132_8200_69	CR_00010C_A	CR_00010C_A	Ca22chrRA_C_albicans_SC5314	-	ATA	8132-8200	IDNLLIVVWRLPIMLLVSRFGQL	ATAGATAATTTATTGATTGTTGTTTGGAGACTACCCATAATGCTTCTGGTATCGCGGTTCGGTCAGCTA	1.04	10.641
CR_00010C_A-T_7214_7459_246	CR_00010C_A	CR_00010C_A	Ca22chrRA_C_albicans_SC5314	-	ATA	7214-7459	IKRTHIHHSLIHIVMDTRKEREQVWTATTTALKMKKSSGNGSNKDSLDVFGFEKGKLPPRVQLISNTKAISATNPDLIFKKA	ATAAAAAGAACGCATATCCATCATTCTCTGATCCACATTGTTATGGACACGAGAAAAGAAAGAGAACAGGTTTGGACTGCTACAACTACAGCTTTAAAAATGAAAAAGAGTTCCGGGAATGGCTCGAACAAAGACAGCTTGGATGTGTTTGGGTTCGAGAAAGGAAAACTCCCCCCAAGGGTTCAGCTTATATCAAATACCAAAGCTATATCTGCAACAAATCCAGATCTTATATTCAAAAAAGCT	0	1.33467
CR_00010C_A-T_7459_7566_108	CR_00010C_A	CR_00010C_A	Ca22chrRA_C_albicans_SC5314	-	ATG	7459-7566	MPNTNEFEDSSQQSRDKLLDSSPLKENRLVKAGLFL	ATGCCTAACACCAACGAATTTGAAGACTCATCTCAGCAATCTAGAGACAAACTTTTGGATTCCTCACCTCTTAAGGAAAACAGGCTAGTGAAAGCTGGTCTTTTTTTA	0	4.18767
CR_00100C_A-T_28282_28344_63	CR_00100C_A	EPL1	Ca22chrRA_C_albicans_SC5314	-	GTG	28282-28344	VRYGYESYNIYDMTKRSPFWL	GTGAGATATGGATATGAGAGCTACAATATATACGACATGACTAAGAGAAGTCCGTTCTGGTTG	4.562	5.09333
CR_00100C_A-T_28213_28272_60	CR_00100C_A	EPL1	Ca22chrRA_C_albicans_SC5314	-	TTG	28213-28272	LLSPCPSFTQFFPSSSHYFH	TTGCTTAGTCCTTGCCCAAGCTTTACCCAGTTCTTCCCCTCATCTTCCCACTACTTCCAC	0	4.12933
CR_00100C_A-T_27568_27708_141	CR_00100C_A	EPL1	Ca22chrRA_C_albicans_SC5314	-	ATA	27568-27708	INLTSNGQFFTYLFATHHRQQQQKKFFSAIGQKSKRENHNTATSKHQ	ATAAACTTAACGTCAAACGGCCAGTTTTTTACATACTTGTTCGCCACGCACCACCGACAACAACAACAGAAAAAATTTTTCTCTGCCATTGGACAAAAGAGCAAGAGAGAAAATCATAACACAGCGACATCCAAACATCAA	0.645	4.359
CR_00100C_A-T_28191_28277_87	CR_00100C_A	EPL1	Ca22chrRA_C_albicans_SC5314	-	AGG	28191-28277	RLCLVLAQALPSSSPHLPTTSTNGKPHIV	AGGCTTTGCTTAGTCCTTGCCCAAGCTTTACCCAGTTCTTCCCCTCATCTTCCCACTACTTCCACTAATGGCAAACCACACATAGTA	0.316667	4.126
CR_00100C_A-T_27861_27971_111	CR_00100C_A	EPL1	Ca22chrRA_C_albicans_SC5314	-	ATA	27861-27971	ILIICRAHTKIFETNFGRQKRKSSDLGKCENKEKILF	ATACTGATCATTTGTCGTGCACATACCAAAATCTTTGAAACCAATTTCGGAAGACAAAAAAGAAAATCGAGTGACTTAGGAAAATGCGAAAACAAGGAGAAAATTTTGTTT	0	6.748
CR_00100C_A-T_28196_28261_66	CR_00100C_A	EPL1	Ca22chrRA_C_albicans_SC5314	-	TTG	28196-28261	LPKLYPVLPLIFPLLPLMANHT	TTGCCCAAGCTTTACCCAGTTCTTCCCCTCATCTTCCCACTACTTCCACTAATGGCAAACCACACA	0	4.372
CR_00100C_A-T_27896_27955_60	CR_00100C_A	EPL1	Ca22chrRA_C_albicans_SC5314	-	GTG	27896-27955	VHIPKSLKPISEDKKENRVT	GTGCACATACCAAAATCTTTGAAACCAATTTCGGAAGACAAAAAAGAAAATCGAGTGACT	0	6.61667
CR_00520C_A-T_125777_125854_78	CR_00520C_A	CRM1	Ca22chrRA_C_albicans_SC5314	-	ATT	125777-125854	IGIYLLLIHQQHNSPAHHSSSSIGEF	ATTGGAATATATTTACTGTTAATACATCAACAACATAACAGTCCTGCTCATCATTCATCATCATCAATTGGAGAATTT	0.46	3.211
CR_00520C_A-T_125591_125758_168	CR_00520C_A	CRM1	Ca22chrRA_C_albicans_SC5314	-	CTG	125591-125758	LQITEPPSSFKDYLNSHQEILQLQRGERKRKKKNKEEKKNKTKRKKKTIKTNKFLF	CTGCAAATTACTGAACCACCTTCCTCATTCAAAGACTATTTAAACTCTCACCAAGAAATACTTCAACTTCAAAGGGGAGAGAGAAAGAGAAAGAAGAAAAACAAAGAAGAAAAAAAAAACAAAACTAAAAGAAAAAAAAAGACCATAAAAACTAATAAATTCCTATTC	1.09667	6.24833
CR_00520C_A-T_125719_125829_111	CR_00520C_A	CRM1	Ca22chrRA_C_albicans_SC5314	-	ATC	125719-125829	INNITVLLIIHHHQLENFDIFLLSCKLLNHLPHSKTI	ATCAACAACATAACAGTCCTGCTCATCATTCATCATCATCAATTGGAGAATTTTGACATTTTTCTTCTTTCCTGCAAATTACTGAACCACCTTCCTCATTCAAAGACTATT	0.571667	3.425
CR_00520C_A-T_125614_125706_93	CR_00520C_A	CRM1	Ca22chrRA_C_albicans_SC5314	-	AAG	125614-125706	KKYFNFKGERERERRKTKKKKKTKLKEKKRP	AAGAAATACTTCAACTTCAAAGGGGAGAGAGAAAGAGAAAGAAGAAAAACAAAGAAGAAAAAAAAAACAAAACTAAAAGAAAAAAAAAGACCA	1.68467	8.85133
CR_00520C_A-T_125634_125732_99	CR_00520C_A	CRM1	Ca22chrRA_C_albicans_SC5314	-	ATT	125634-125732	IQRLFKLSPRNTSTSKGREKEKEEKQRRKKKQN	ATTCAAAGACTATTTAAACTCTCACCAAGAAATACTTCAACTTCAAAGGGGAGAGAGAAAGAGAAAGAAGAAAAACAAAGAAGAAAAAAAAAACAAAAC	0.747667	8.09033
CR_00580W_A-T_136066_136146_81	CR_00580W_A	YRB1	Ca22chrRA_C_albicans_SC5314	+	ATT	136066-136146	IAYYLFNLNITTTTTTTTHNLQPQLLL	ATTGCATATTATTTATTTAATTTAAATATAACAACAACAACTACTACAACAACCCACAACCTACAGCCACAATTACTCCTA	10.425	10.3873
CR_00780C_A-T_184255_184338_84	CR_00780C_A	GSY1	Ca22chrRA_C_albicans_SC5314	-	ATT	184255-184338	ICLTVSFLSFHFVLFHFPTVPPLVFVHI	ATTTGTTTGACTGTTTCTTTCCTTTCGTTTCATTTCGTTTTGTTTCATTTTCCCACCGTCCCCCCTTTAGTTTTTGTCCACATT	1.739	6.152
CR_00780C_A-T_184250_184336_87	CR_00780C_A	GSY1	Ca22chrRA_C_albicans_SC5314	-	TTG	184250-184336	LFDCFFPFVSFRFVSFSHRPPFSFCPHLI	TTGTTTGACTGTTTCTTTCCTTTCGTTTCATTTCGTTTTGTTTCATTTTCCCACCGTCCCCCCTTTAGTTTTTGTCCACATTTAATT	3.26267	6.153
CR_00820C_A-T_190361_190444_84	CR_00820C_A	CR_00820C_A	Ca22chrRA_C_albicans_SC5314	-	CTG	190361-190444	LILHIWKNTLMKYCKKCLCRNKLYCLNY	CTGATATTGCATATTTGGAAAAACACGTTGATGAAATATTGCAAAAAGTGTTTGTGCCGGAACAAGTTGTATTGTTTGAATTAT	2.21233	9.80967
CR_00820C_A-T_190217_190276_60	CR_00820C_A	CR_00820C_A	Ca22chrRA_C_albicans_SC5314	-	ATG	190217-190276	MRNNPNKLHQLSSMMMCIKN	ATGAGAAACAATCCAAACAAGCTACACCAATTGAGCAGCATGATGATGTGCATCAAGAAT	11.2733	16.6113
CR_00820C_A-T_189915_190673_759	CR_00820C_A	CR_00820C_A	Ca22chrRA_C_albicans_SC5314	-	ATA	189915-190673	ISLTQQMTVEELTDEISAIEAIYPESVTNLGPQLYTFKIPNHESVSIQLNFPLTYPEEIPQLLQIIVEKTTQSSSFTDIAYLEKHVDEILQKVFVPEQVVLFELLTELQEFFDQYVEEHPEPVIEKIEVTPTNEKQSKQATPIEQHDDVHQELKDPTIDWIQSDPIVDRGSTFIAYVRQVNTLQDAQEYLDDLLTDKKIAKATHNISSWRIKMENGVTFQDCDDDGETAAGGRLLHLLQVCINNEILLLLINF	ATATCTCTAACACAACAGATGACAGTTGAAGAATTAACTGATGAGATAAGTGCTATTGAAGCAATTTATCCCGAATCTGTAACCAATTTAGGTCCTCAATTATATACTTTTAAAATACCAAATCATGAATCAGTTAGTATCCAATTAAATTTCCCATTGACATATCCTGAAGAAATCCCTCAATTGTTACAAATTATAGTAGAGAAAACTACTCAATCGTCATCATTTACTGATATTGCATATTTGGAAAAACACGTTGATGAAATATTGCAAAAAGTGTTTGTGCCGGAACAAGTTGTATTGTTTGAATTATTGACTGAATTACAGGAGTTTTTTGATCAATACGTTGAAGAGCACCCTGAACCAGTGATTGAAAAGATAGAGGTAACGCCAACTAAT…	2.897	10.4807
CR_00850C_A-T_197465_197539_75	CR_00850C_A	GSL2	Ca22chrRA_C_albicans_SC5314	-	AGG	197465-197539	RLIRMTQLSCSSVQQLQLVRITRDG	AGGTTGATAAGGATGACTCAATTGAGTTGCTCAAGCGTACAGCAACTGCAATTAGTACGGATAACACGTGATGGA	0.367333	2.72433
CR_00920W_A-T_206618_206680_63	CR_00920W_A	CCE1	Ca22chrRA_C_albicans_SC5314	+	ATT	206618-206680	IISFFSQDCIIYFLLIILKLK	ATTATTTCCTTTTTTTCCCAAGATTGTATTATCTACTTTTTACTAATAATTTTGAAATTAAAA	0.569667	28.3513
CR_00920W_A-T_206732_206791_60	CR_00920W_A	CCE1	Ca22chrRA_C_albicans_SC5314	+	TTG	206732-206791	LIIIILILIIITEKQSSPSD	TTGATAATAATAATACTAATACTAATAATAATTACTGAAAAACAGTCTAGTCCAAGTGAT	1.196	5.13467
CR_00920W_A-T_206571_206660_90	CR_00920W_A	CCE1	Ca22chrRA_C_albicans_SC5314	+	AGG	206571-206660	REEHLLFFSIKTMINKLFPFFPKIVLSTFY	AGGGAGGAACATCTTTTATTCTTTTCAATCAAAACGATGATTAATAAATTATTTCCTTTTTTTCCCAAGATTGTATTATCTACTTTTTAC	6.834	141.326
CR_00920W_A-T_206614_206685_72	CR_00920W_A	CCE1	Ca22chrRA_C_albicans_SC5314	+	ATA	206614-206685	INYFLFFPRLYYLLFTNNFEIKIK	ATAAATTATTTCCTTTTTTTCCCAAGATTGTATTATCTACTTTTTACTAATAATTTTGAAATTAAAATAAAA	0.498333	32.0127
CR_00980C_A-T_219011_219187_177	CR_00980C_A	CR_00980C_A	Ca22chrRA_C_albicans_SC5314	-	ATT	219011-219187	IQTNNPISYLLISTQLISRVIILIFPLYLSIENESFLLIPYPPLVIFLPSFASYFLIYI	ATTCAAACCAATAACCCGATCAGTTATTTACTAATCTCAACTCAACTCATTTCTCGAGTAATTATTTTGATTTTTCCCTTATATTTGAGTATTGAAAACGAATCATTTCTTTTGATACCATATCCTCCACTAGTTATTTTTTTGCCTTCATTTGCTTCATATTTTCTTATATATATA	0.872333	2.34867
CR_00980C_A-T_219157_219231_75	CR_00980C_A	CR_00980C_A	Ca22chrRA_C_albicans_SC5314	-	ACG	219157-219231	TPPSYSYFYSTKTNSFKPITRSVIY	ACGCCTCCTTCTTACTCCTATTTCTATTCAACCAAAACTAATTCATTCAAACCAATAACCCGATCAGTTATTTAC	2.05867	5.64167
CR_00980C_A-T_218974_219036_63	CR_00980C_A	CR_00980C_A	Ca22chrRA_C_albicans_SC5314	-	TTG	218974-219036	LLHIFLYIYNINSAAHTLNTF	TTGCTTCATATTTTCTTATATATATATAATATCAACTCAGCAGCACATACACTCAATACATTT	0.569667	2.278
CR_01040C_A-T_235078_235158_81	CR_01040C_A	ARC19	Ca22chrRA_C_albicans_SC5314	-	ATG	235078-235158	MVRNFTSTLFEELGTFLTNTFLFFPFS	ATGGTACGTAATTTCACTAGCACACTTTTTGAAGAGTTGGGCACTTTTCTTACTAACACTTTCCTGTTCTTTCCTTTTTCT	3.60733	17.4493
CR_01590C_A-T_363480_363554_75	CR_01590C_A	TRP2	Ca22chrRA_C_albicans_SC5314	-	TTG	363480-363554	LSHFSKVCLYNKTEMTVCFNSIVRE	TTGAGTCATTTTTCAAAAGTTTGTTTATACAACAAGACAGAAATGACGGTATGTTTTAACAGTATAGTTCGTGAA	22.855	29.814
CR_01680C_A-T_383440_383610_171	CR_01680C_A	CDC4	Ca22chrRA_C_albicans_SC5314	-	ATC	383440-383610	IDTIKKILFIFKSKLYIPIHVFLKNFVYNEPEPFPPFFFCFVSFNCLLRPEFIKVSV	ATCGATACCATCAAGAAGATTTTATTCATATTTAAATCTAAATTATACATACCCATACACGTATTCTTAAAAAACTTTGTATATAACGAACCGGAGCCCTTCCCCCCTTTTTTTTTCTGTTTCGTTTCGTTTAATTGTTTGTTACGTCCTGAGTTCATCAAAGTATCTGTG	5.47833	4.273
CR_01680C_A-T_383359_383436_78	CR_01680C_A	CDC4	Ca22chrRA_C_albicans_SC5314	-	ATT	383359-383436	ILDTKVSVDFQFVTTKTCIVGNKGYI	ATTTTGGATACAAAAGTTTCTGTTGATTTTCAGTTTGTCACAACAAAAACTTGTATAGTCGGCAACAAAGGTTATATT	7.418	3.794
CR_01680C_A-T_383149_383280_132	CR_01680C_A	CDC4	Ca22chrRA_C_albicans_SC5314	-	AAG	383149-383280	KQTLGITFLILKRSVNLFEYCQIHYYCLLLLLLLSRKEPDFVLF	AAGCAAACACTAGGAATTACTTTTTTGATATTGAAACGGTCAGTTAACTTGTTTGAATATTGTCAGATCCACTATTACTGTTTATTATTATTATTATTATTATCGAGAAAGGAACCTGATTTCGTTTTATTT	8.539	30.3587
CR_01680C_A-T_383382_383534_153	CR_01680C_A	CDC4	Ca22chrRA_C_albicans_SC5314	-	TTG	383382-383534	LYITNRSPSPLFFSVSFRLIVCYVLSSSKYLCEFWIQKFLLIFSLSQQKLV	TTGTATATAACGAACCGGAGCCCTTCCCCCCTTTTTTTTTCTGTTTCGTTTCGTTTAATTGTTTGTTACGTCCTGAGTTCATCAAAGTATCTGTGTGAATTTTGGATACAAAAGTTTCTGTTGATTTTCAGTTTGTCACAACAAAAACTTGTA	8.284	4.406
CR_01680C_A-T_383165_383224_60	CR_01680C_A	CDC4	Ca22chrRA_C_albicans_SC5314	-	ATA	383165-383224	ILSDPLLLFIIIIIIIEKGT	ATATTGTCAGATCCACTATTACTGTTTATTATTATTATTATTATTATCGAGAAAGGAACC	15.1127	64.0097
CR_01680C_B-T_383284_383355_72	CR_01680C_B	CR_01680C_B	Ca22chrRB_C_albicans_SC5314	-	AAG	383284-383355	KVIFDLIKASFKEFRIFYLTAHQQ	AAGGTTATATTTGATTTGATCAAGGCTTCATTTAAAGAGTTTAGGATATTTTATTTAACTGCCCATCAGCAA	1.37933	4.043
CR_01680C_B-T_383223_383297_75	CR_01680C_B	CR_01680C_B	Ca22chrRB_C_albicans_SC5314	-	CTG	383223-383297	LPISNSVITSKANIRNYFFDIETVS	CTGCCCATCAGCAATAGTGTAATCACAAGTAAAGCAAACATTAGGAATTACTTTTTTGATATTGAAACGGTCAGT	1.324	6.253
CR_01750C_A-T_397966_398088_123	CR_01750C_A	SEC4	Ca22chrRA_C_albicans_SC5314	-	ATA	397966-398088	IHLFILSWIHRSWNIIIFYNYFTNNTHDITGDLVYYFGLFL	ATACATTTATTCATATTGTCCTGGATTCATAGATCTTGGAACATAATAATATTTTACAACTATTTTACAAACAATACCCACGATATAACTGGAGATTTAGTTTACTATTTTGGATTGTTTTTG	8.68433	9.448
CR_01750C_A-T_397934_398056_123	CR_01750C_A	SEC4	Ca22chrRA_C_albicans_SC5314	-	ATC	397934-398056	ILEHNNILQLFYKQYPRYNWRFSLLFWIVFVIFFFPPRFIF	ATCTTGGAACATAATAATATTTTACAACTATTTTACAAACAATACCCACGATATAACTGGAGATTTAGTTTACTATTTTGGATTGTTTTTGTAATTTTTTTTTTCCCTCCCCGTTTTATTTTT	7.877	18.3957
CR_01750C_B-T_397956_398078_123	CR_01750C_B	CR_01750C_B	Ca22chrRB_C_albicans_SC5314	-	ATA	397956-398078	IHLFILSWIHRSWNIITFYNYFTNNTHDITGDLVYYFGLFL	ATACATTTATTCATATTGTCCTGGATTCATAGATCTTGGAACATAATAACATTTTACAACTATTTTACAAACAATACCCACGATATAACTGGAGATTTAGTTTACTATTTTGGATTGTTTTTG	8.66867	13.029
CR_01750C_B-T_397924_398046_123	CR_01750C_B	CR_01750C_B	Ca22chrRB_C_albicans_SC5314	-	ATC	397924-398046	ILEHNNILQLFYKQYPRYNWRFSLLFWIVFVIFFFPPRFIF	ATCTTGGAACATAATAACATTTTACAACTATTTTACAAACAATACCCACGATATAACTGGAGATTTAGTTTACTATTTTGGATTGTTTTTGTAATTTTTTTTTTCCCTCCCCGTTTTATTTTT	8.66867	13.029
CR_01770C_A-T_403879_404004_126	CR_01770C_A	CR_01770C_A	Ca22chrRA_C_albicans_SC5314	-	AAG	403879-404004	KSLRQSGSVDRLYIKRVGLELASIRMMLFLSGILILDVARPL	AAGAGTCTTAGGCAGAGTGGCTCCGTCGACAGATTGTATATTAAGCGGGTTGGTCTTGAGCTCGCTAGTATTAGGATGATGCTTTTTTTAAGTGGAATTTTGATATTGGATGTTGCTCGACCACTA	27272.6	34262
CR_01770C_A-T_404211_404276_66	CR_01770C_A	CR_01770C_A	Ca22chrRA_C_albicans_SC5314	-	CTG	404211-404276	LVIFNSWFFIFLCRMFSLADRR	CTGGTTATTTTTAATAGCTGGTTCTTTATTTTCCTCTGTAGAATGTTTTCCTTAGCAGATCGGCGC	3237.03	2948.71
CR_01770C_A-T_404058_404129_72	CR_01770C_A	CR_01770C_A	Ca22chrRA_C_albicans_SC5314	-	ATT	404058-404129	ICFQLVLPFFGGSFERLDFKGWMS	ATTTGTTTTCAGCTGGTCCTCCCCTTTTTTGGGGGGAGTTTTGAGCGGTTGGATTTTAAAGGCTGGATGAGC	136.867	1347.59
CR_01770C_A-T_403929_403988_60	CR_01770C_A	CR_01770C_A	Ca22chrRA_C_albicans_SC5314	-	GTG	403929-403988	VAPSTDCILSGLVLSSLVLG	GTGGCTCCGTCGACAGATTGTATATTAAGCGGGTTGGTCTTGAGCTCGCTAGTATTAGGA	56916.5	67984.1
CR_01770C_A-T_403830_403895_66	CR_01770C_A	CR_01770C_A	Ca22chrRA_C_albicans_SC5314	-	ATG	403830-403895	MLLDHYNPWQHIPGLCEGHIGR	ATGTTGCTCGACCACTATAATCCGTGGCAACATATTCCTGGACTCTGCGAAGGTCATATTGGCCGC	1073.7	5337.12
CR_01770C_A-T_404063_404218_156	CR_01770C_A	CR_01770C_A	Ca22chrRA_C_albicans_SC5314	-	ATC	404063-404218	IGAREASLMFNFFLSSSTIFLIHCFNVYSKFVFSWSSPFLGGVLSGWILKAG	ATCGGCGCTAGAGAAGCAAGCCTGATGTTCAATTTCTTTCTAAGTTCCTCAACAATTTTCCTTATTCACTGTTTTAACGTTTATTCAAAATTTGTTTTCAGCTGGTCCTCCCCTTTTTTGGGGGGAGTTTTGAGCGGTTGGATTTTAAAGGCTGGA	970.318	2016.66
CR_01770C_A-T_403790_403915_126	CR_01770C_A	CR_01770C_A	Ca22chrRA_C_albicans_SC5314	-	AAG	403790-403915	KWNFDIGCCSTTIIRGNIFLDSAKVILAADDLSKTMLQTFLF	AAGTGGAATTTTGATATTGGATGTTGCTCGACCACTATAATCCGTGGCAACATATTCCTGGACTCTGCGAAGGTCATATTGGCCGCTGACGATTTGAGTAAAACCATGTTGCAAACATTTCTTTTT	1766.52	4107.1
CR_01770C_B-T_404195_404260_66	CR_01770C_B	CR_01770C_B	Ca22chrRB_C_albicans_SC5314	-	CTG	404195-404260	LVIFNSWFFIFLCRMFSLADRR	CTGGTTATTTTTAATAGCTGGTTCTTTATTTTCCTCTGTAGAATGTTTTCCTTAGCAGATCGGCGC	346.957	445.77
CR_01770C_B-T_404042_404113_72	CR_01770C_B	CR_01770C_B	Ca22chrRB_C_albicans_SC5314	-	ATT	404042-404113	ICFQLVLPFFGGSFERLDFKGWMS	ATTTGTTTTCAGCTGGTCCTCCCCTTTTTTGGGGGGAGTTTTGAGCGGTTGGATTTTAAAGGCTGGATGAGC	36.6797	141.63
CR_01770C_B-T_404047_404202_156	CR_01770C_B	CR_01770C_B	Ca22chrRB_C_albicans_SC5314	-	ATC	404047-404202	IGASEASLMFNFFLSSSTIFLIHCFNVYSKFVFSWSSPFLGGVLSGWILKAG	ATCGGCGCTAGCGAAGCAAGCCTGATGTTCAATTTCTTTCTAAGTTCCTCAACAATTTTCCTTATTCACTGTTTTAACGTTTATTCAAAATTTGTTTTCAGCTGGTCCTCCCCTTTTTTGGGGGGAGTTTTGAGCGGTTGGATTTTAAAGGCTGGA	549.452	588.982
CR_01770C_B-T_403741_403899_159	CR_01770C_B	CR_01770C_B	Ca22chrRB_C_albicans_SC5314	-	AAG	403741-403899	KWNFDIGCCSTTIIRGNIFLDSAKVILAADDLSKTMLQTFFLNKVKIFFLHDC	AAGTGGAATTTTGATATTGGATGTTGCTCGACCACTATAATCCGTGGCAACATATTCCTGGACTCTGCGAAGGTCATATTGGCCGCTGACGATTTGAGTAAAACCATGTTGCAAACATTTTTTTTAAATAAAGTTAAAATTTTTTTTTTACATGATTGT	8.24433	0.559333
CR_01770C_B-T_403567_403647_81	CR_01770C_B	CR_01770C_B	Ca22chrRB_C_albicans_SC5314	-	ATT	403567-403647	ILITLCWELECQVPAQKCKETAKEKKK	ATTTTGATAACTCTTTGTTGGGAATTGGAGTGCCAGGTTCCCGCCCAAAAATGCAAAGAAACAGCAAAAGAAAAAAAAAAG	0	1.641
CR_01970C_A-T_430961_431089_129	CR_01970C_A	VMA4	Ca22chrRA_C_albicans_SC5314	-	ACG	430961-431089	TRPISFNTTIETHNNGFIRRTGMLDIRLNMCFRPCDNVTNRFV	ACGAGACCAATTTCATTTAATACAACAATTGAGACACACAACAATGGCTTTATCAGACGAACAGGTATGTTAGATATTAGATTGAATATGTGTTTTAGACCTTGTGATAATGTTACTAACCGCTTTGTC	30.4487	58.185
CR_01970C_A-T_431020_431100_81	CR_01970C_A	VMA4	Ca22chrRA_C_albicans_SC5314	-	ATT	431020-431100	IQFRRDQFHLIQQLRHTTMALSDEQVC	ATTCAGTTTCGACGAGACCAATTTCATTTAATACAACAATTGAGACACACAACAATGGCTTTATCAGACGAACAGGTATGT	48.4927	91.155
CR_02000C_A-T_437888_437950_63	CR_02000C_A	HEM1	Ca22chrRA_C_albicans_SC5314	-	TTG	437888-437950	LLLLVAISKVKSTIFIKRKDT	TTGCTTTTACTTGTTGCTATTTCAAAAGTAAAATCTACTATTTTCATTAAAAGAAAGGATACA	8.00467	23.5897
CR_02000C_A-T_437923_437982_60	CR_02000C_A	HEM1	Ca22chrRA_C_albicans_SC5314	-	ATT	437923-437982	ICWFTQIFKEICFYLLLFQK	ATTTGTTGGTTTACTCAAATATTTAAAGAGATTTGCTTTTACTTGTTGCTATTTCAAAAG	1.05733	0.988333
CR_02050C_A-T_451997_452101_105	CR_02050C_A	HDA1	Ca22chrRA_C_albicans_SC5314	-	ATA	451997-452101	IRNIIKKNQTYNNKKHLADTNHRLHIVTSQYHKKN	ATAAGAAATATAATTAAAAAAAATCAAACTTATAACAACAAGAAACACTTGGCCGATACTAATCACCGCTTACATATTGTAACCAGTCAATATCATAAAAAAAAT	15.5233	18.5203
CR_02350C_A-T_522858_522920_63	CR_02350C_A	GEF2	Ca22chrRA_C_albicans_SC5314	-	ATT	522858-522920	ICSRYQTPAALLIHQRPNQNN	ATTTGCTCCCGATATCAAACACCCGCCGCACTCCTCATTCATCAAAGACCAAACCAAAACAAT	0	2.24333
CR_02350C_A-T_522827_523012_186	CR_02350C_A	GEF2	Ca22chrRA_C_albicans_SC5314	-	ATT	522827-523012	IREKNNMSSDQSTSNHLNQNTKPGLQKPNLTFAPDIKHPPHSSFIKDQTKTIRTVPLSLYR	ATTAGAGAAAAAAATAATATGTCAAGTGACCAAAGTACATCAAATCACTTGAATCAAAATACTAAACCCGGATTACAAAAACCTAACCTCACATTTGCTCCCGATATCAAACACCCGCCGCACTCCTCATTCATCAAAGACCAAACCAAAACAATTAGAACTGTACCCKAACTCTCCCTATATCGA	0	11.7433
CR_02350C_A-T_522761_522823_63	CR_02350C_A	GEF2	Ca22chrRA_C_albicans_SC5314	-	TTG	522761-522823	LFDTTTTIIIKYTFIRIKTFN	TTGTTCGACACCACCACCACCATCATCATCAAATACACTTTTATCAGGATCAAGACCTTTAAC	5.16233	12.938
CR_02350C_A-T_522662_522727_66	CR_02350C_A	GEF2	Ca22chrRA_C_albicans_SC5314	-	ATC	522662-522727	ITYPHKFSITNTQDPSFRSITR	ATCACCTATCCCCATAAATTCAGTATTACAAACACCCAGGATCCCAGCTTTAGATCAATTACAAGA	0.417333	2.23833
CR_02640W_A-T_599079_599177_99	CR_02640W_A	RFG1	Ca22chrRA_C_albicans_SC5314	+	TTG	599079-599177	LVYSYNIEGFPYTHINTFTHRYTNTLQFNFLKV	TTGGTATATTCATATAATATAGAAGGTTTTCCTTATACACACATTAACACATTCACACATAGATACACCAATACACTTCAATTTAATTTCTTGAAGGTT	1.44967	0.856
CR_02640W_A-T_599775_599861_87	CR_02640W_A	RFG1	Ca22chrRA_C_albicans_SC5314	+	ATA	599775-599861	IIIPNRQIIYQGWFFFCTHIQIQPPTHPF	ATAATAATTCCAAACAGACAAATTATTTATCAGGGCTGGTTTTTTTTTTGTACACACATACAAATACAACCACCAACACATCCCTTT	2.62933	1.83167
CR_02640W_A-T_599101_599169_69	CR_02640W_A	RFG1	Ca22chrRA_C_albicans_SC5314	+	AAG	599101-599169	KVFLIHTLTHSHIDTPIHFNLIS	AAGGTTTTCCTTATACACACATTAACACATTCACACATAGATACACCAATACACTTCAATTTAATTTCT	2.08	1.12067
CR_02640W_A-T_599326_599472_147	CR_02640W_A	RFG1	Ca22chrRA_C_albicans_SC5314	+	TTG	599326-599472	LLLLLLFNVSPPLIIPPLFWYCIVLFSHTTTKTTLITTTRRRTTTKALI	TTGCTTTTATTATTATTATTTAACGTTTCACCACCCCTCATCATTCCCCCATTGTTTTGGTATTGTATTGTATTGTTTTCACATACTACTACTAAGACAACGTTAATAACAACAACAAGAAGAAGAACAACAACAAAGGCTTTGATT	2.868	3.71033
CR_02640W_A-T_599689_599775_87	CR_02640W_A	RFG1	Ca22chrRA_C_albicans_SC5314	+	ATA	599689-599775	ILLLVLSIIYNIIIIDKLFPLVTPIFRTK	ATACTACTACTAGTACTATCAATTATTTATAATATTATTATAATTGATAAGCTATTTCCTTTGGTGACTCCGATTTTCCGAACTAAA	4.52933	9.01833
CR_02640W_A-T_599234_599428_195	CR_02640W_A	RFG1	Ca22chrRA_C_albicans_SC5314	+	ATT	599234-599428	IPFNNIFLSPLPSPIVNLSITAIAAIDNNNNCFYYYYLTFHHPSSFPHCFGIVLYCFHILLLRQR	ATTCCCTTTAATAATATTTTTTTATCCCCCCTCCCTTCTCCTATCGTTAATTTATCTATTACTGCTATTGCTGCTATTGATAATAATAACAATTGCTTTTATTATTATTATTTAACGTTTCACCACCCCTCATCATTCCCCCATTGTTTTGGTATTGTATTGTATTGTTTTCACATACTACTACTAAGACAACGT	1.597	2.417
CR_02690W_A-T_618742_618813_72	CR_02690W_A	CR_02690W_A	Ca22chrRA_C_albicans_SC5314	+	ATA	618742-618813	ITNQINSIQFNSIQFNHPLFFLPT	ATAACAAATCAAATCAATTCAATTCAATTCAATTCAATTCAATTCAATCATCCCTTGTTCTTCCTTCCCACC	12.4937	2
CR_02690W_A-T_618749_618829_81	CR_02690W_A	CR_02690W_A	Ca22chrRA_C_albicans_SC5314	+	ATC	618749-618829	IKSIQFNSIQFNSIIPCSSFPPSSKHA	ATCAAATCAATTCAATTCAATTCAATTCAATTCAATTCAATCATCCCTTGTTCTTCCTTCCCACCTAGTAGCAAACACGCT	11.1053	11.24
CR_02860W_A-T_653736_653810_75	CR_02860W_A	RHO1	Ca22chrRA_C_albicans_SC5314	+	ATA	653736-653810	IFLIPLFNYFQQQPPYLPSPPLFPF	ATATTTTTAATCCCTTTATTTAATTACTTTCAACAACAACCACCCTACCTTCCCTCCCCTCCCCTCTTCCCCTTT	24.709	21.7267
CR_02860W_A-T_653758_653838_81	CR_02860W_A	RHO1	Ca22chrRA_C_albicans_SC5314	+	ATT	653758-653838	ITFNNNHPTFPPLPSSPFNNTSIKYNI	ATTACTTTCAACAACAACCACCCTACCTTCCCTCCCCTCCCCTCTTCCCCTTTTAATAATACATCTATCAAATATAACATA	25.2277	21.2157
CR_02910W_A-T_664399_664500_102	CR_02910W_A	CR_02910W_A	Ca22chrRA_C_albicans_SC5314	+	ATA	664399-664500	ILVSSIVKQFHSLSSFPFFHFPASYHIWFLLHIS	ATACTCGTTTCAAGTATTGTTAAACAATTTCATTCTCTTTCCTCTTTTCCTTTCTTCCATTTTCCCGCTTCCTACCACATTTGGTTCCTGTTGCATATTTCT	0.351667	1.01233
CR_03010C_A-T_690962_691075_114	CR_03010C_A	ERV1	Ca22chrRA_C_albicans_SC5314	-	AGG	690962-691075	RQNQCQLQKRQKKPSLIVNQKLVSLDVRLSTIKMGNRK	AGGCAAAACCAATGTCAACTACAGAAACGACAGAAAAAACCGAGTCTAATAGTAAACCAGAAGTTGGTTTCACTGGACGTAAGATTGTCTACGATAAAGATGGGAAACCGTAAG	20.388	17.7043
CR_03010C_A-T_690966_691091_126	CR_03010C_A	ERV1	Ca22chrRA_C_albicans_SC5314	-	ATC	690966-691091	ISLLVKAKPMSTTETTEKTESNSKPEVGFTGRKIVYDKDGKP	ATCTCCTTACTTGTAAAGGCAAAACCAATGTCAACTACAGAAACGACAGAAAAAACCGAGTCTAATAGTAAACCAGAAGTTGGTTTCACTGGACGTAAGATTGTCTACGATAAAGATGGGAAACCG	18.446	11.4193
CR_03010C_B-T_690898_691011_114	CR_03010C_B	CR_03010C_B	Ca22chrRB_C_albicans_SC5314	-	AGG	690898-691011	RQNQCQLQKQQKKPSLIVNQKLVSLDVRLSTIKMGNRK	AGGCAAAACCAATGTCAACTACAGAAACAACAGAAAAAACCGAGTCTAATAGTAAACCAGAAGTTGGTTTCACTGGACGTAAGATTGTCTACGATAAAGATGGGAAACCGTAAG	4.95233	1.779
CR_03010C_B-T_690902_691027_126	CR_03010C_B	CR_03010C_B	Ca22chrRB_C_albicans_SC5314	-	ATC	690902-691027	ISLLVKAKPMSTTETTEKTESNSKPEVGFTGRKIVYDKDGKP	ATCTCCTTACTTGTGAAGGCAAAACCAATGTCAACTACAGAAACAACAGAAAAAACCGAGTCTAATAGTAAACCAGAAGTTGGTTTCACTGGACGTAAGATTGTCTACGATAAAGATGGGAAACCG	4.48067	1.81533
CR_03030C_A-T_693457_693531_75	CR_03030C_A	RPL28	Ca22chrRA_C_albicans_SC5314	-	ATG	693457-693531	MPTRLTKTRKHRGNVSGMYNFTKVS	ATGCCTACTAGATTAACTAAAACCAGAAAACACAGAGGTAATGTTTCTGGTATGTACAATTTCACTAAAGTTTCA	985.288	508.403
CR_03030C_B-T_693321_693383_63	CR_03030C_B	CR_03030C_B	Ca22chrRB_C_albicans_SC5314	-	AAG	693321-693383	KSIECSRTYGDLEKTWKTNRK	AAGAGTATTGAATGTTCAAGGACATATGGAGATTTAGAGAAAACATGGAAAACTAATCGAAAA	0.569667	1.59633
CR_03030C_B-T_693350_693466_117	CR_03030C_B	CR_03030C_B	Ca22chrRB_C_albicans_SC5314	-	ATG	693350-693466	MPTRLTKTRKHRGNVSGMYNFTKVLTDERVLNVQGHMEI	ATGCCTACTAGATTAACTAAAACCAGAAAACACAGAGGTAATGTTTCTGGTATGTACAATTTCACTAAAGTTTTAACGGATGAAAGAGTATTGAATGTTCAAGGACATATGGAGATT	0.306667	1.081
CR_03250C_A-T_729678_729761_84	CR_03250C_A	CR_03250C_A	Ca22chrRA_C_albicans_SC5314	-	AAG	729678-729761	KKNYVSELREQPDKASDRNYSTKEVSFF	AAGAAGAATTACGTGAGTGAACTACGTGAACAGCCTGACAAAGCCTCAGATAGAAACTATTCAACCAAAGAAGTTAGTTTTTTT	3.28	3.403
CR_03250C_A-T_729665_729745_81	CR_03250C_A	CR_03250C_A	Ca22chrRA_C_albicans_SC5314	-	GTG	729665-729745	VNYVNSLTKPQIETIQPKKLVFFDFPI	GTGAACTACGTGAACAGCCTGACAAAGCCTCAGATAGAAACTATTCAACCAAAGAAGTTAGTTTTTTTTGATTTTCCCATT	3.40167	3.163
CR_03420C_A-T_759482_759541_60	CR_03420C_A	NOT4	Ca22chrRA_C_albicans_SC5314	-	ATC	759482-759541	IMIQADDTFISDDEEEYWYV	ATCATGATTCAAGCCGACGATACTTTCATCAGTGATGATGAAGAAGAATACTGGTATGTT	26.8777	5.11767
CR_03420C_A-T_759463_759531_69	CR_03420C_A	NOT4	Ca22chrRA_C_albicans_SC5314	-	AAG	759463-759531	KPTILSSVMMKKNTGMFNIIKHS	AAGCCGACGATACTTTCATCAGTGATGATGAAGAAGAATACTGGTATGTTTAACATAATAAAGCACAGT	22.9723	5.14867
CR_03470W_A-T_767313_767402_90	CR_03470W_A	CR_03470W_A	Ca22chrRA_C_albicans_SC5314	+	AAG	767313-767402	KPDYIKLDDTFSIRTVSNPFLCPFFALTSL	AAGCCTGATTATATCAAATTGGACGATACATTTTCAATCAGAACTGTTTCAAATCCTTTTCTTTGCCCTTTTTTTGCTTTGACTTCACTA	0.306	4.243
CR_03470W_A-T_767128_767265_138	CR_03470W_A	CR_03470W_A	Ca22chrRA_C_albicans_SC5314	+	TTG	767128-767265	LTYLGSTQLNTNQIFLLFDINRLKLSQHVYVPQLIFFFSRWFPPKH	TTGACATATTTGGGATCAACACAACTGAACACTAATCAAATATTTCTCCTTTTTGATATTAATAGATTAAAATTATCCCAACACGTCTACGTGCCACAGCTAATCTTTTTTTTTTCTCGTTGGTTTCCTCCTAAACAC	0.673333	2.79767
CR_03470W_A-T_767330_767434_105	CR_03470W_A	CR_03470W_A	Ca22chrRA_C_albicans_SC5314	+	ATT	767330-767434	IGRYIFNQNCFKSFSLPFFCFDFTIIFLASFCKLN	ATTGGACGATACATTTTCAATCAGAACTGTTTCAAATCCTTTTCTTTGCCCTTTTTTTGCTTTGACTTCACTATAATATTCCTAGCAAGTTTCTGCAAACTGAAT	0.262333	3.70733
CR_03610C_A-T_799181_799249_69	CR_03610C_A	VTC3	Ca22chrRA_C_albicans_SC5314	-	AAG	799181-799249	KETKKKTKFPKKYSKSQKSQKKK	AAGGAAACTAAGAAAAAAACCAAATTCCCAAAAAAGTATTCAAAATCTCAAAAAAGTCAAAAAAAAAAA	9.10967	0.698
CR_03610C_A-T_798980_799123_144	CR_03610C_A	VTC3	Ca22chrRA_C_albicans_SC5314	-	AAG	798980-799123	KTIPFFLHLITLPSPIFTIFSIGRCCCCCFFVFSPFLDTSIQIKGHVI	AAGACTATTCCATTTTTCTTACATTTAATTACACTCCCCTCTCCTATATTCACTATTTTTTCAATTGGTCGTTGTTGTTGTTGTTGTTTTTTTGTCTTTTCCCCCTTTCTTGATACAAGCATACAAATAAAAGGTCATGTCATA	3.27467	2.158
CR_03610C_A-T_799168_799380_213	CR_03610C_A	VTC3	Ca22chrRA_C_albicans_SC5314	-	TTG	799168-799380	LFCYSFIFQIDNSFHLLALISFLQEIKRKKYNSIDKLQPHNQQARKLRKKPNSQKSIQNLKKVKKKNNNSY	TTGTTTTGTTATTCATTCATTTTTCAAATAGATAATTCATTTCATTTACTTGCACTTATTAGCTTTTTACAAGAAATTAAAAGAAAAAAATACAACAGTATTGATAAACTGCAACCTCATAACCAACAAGCAAGGAAACTAAGAAAAAAACCAAATTCCCAAAAAAGTATTCAAAATCTCAAAAAAGTCAAAAAAAAAAATAATAATTCATAT	3.11933	0.609
CR_03610C_A-T_798997_799059_63	CR_03610C_A	VTC3	Ca22chrRA_C_albicans_SC5314	-	TTG	798997-799059	LVVVVVVVFLSFPPFLIQAYK	TTGGTCGTTGTTGTTGTTGTTGTTTTTTTGTCTTTTCCCCCTTTCTTGATACAAGCATACAAA	4.86133	2.87433
CR_03610C_A-T_799014_799112_99	CR_03610C_A	VTC3	Ca22chrRA_C_albicans_SC5314	-	ATT	799014-799112	IFLTFNYTPLSYIHYFFNWSLLLLLFFCLFPLS	ATTTTTCTTACATTTAATTACACTCCCCTCTCCTATATTCACTATTTTTTCAATTGGTCGTTGTTGTTGTTGTTGTTTTTTTGTCTTTTCCCCCTTTCT	3.92867	1.68433
CR_03770C_A-T_840736_840870_135	CR_03770C_A	RPS30	Ca22chrRA_C_albicans_SC5314	-	ATT	840736-840870	ILEPIEFYIIVNIHHIKSRQNGMSTITFELELSNNERAGAYIEVR	ATTCTTGAACCAATTGAGTTTTATATTATAGTAAACATACACCACATTAAATCACGTCAAAATGGTATGTCGACGATAACGTTTGAATTGGAATTATCAAATAATGAGAGAGCAGGGGCATACATCGAAGTCAGA	52.6323	92.3103
CR_03770C_A-T_840655_840723_69	CR_03770C_A	RPS30	Ca22chrRA_C_albicans_SC5314	-	ATC	840655-840723	INTTRIILVWDLDTQRLKRINYE	ATCAATACGACAAGAATAATATTAGTCTGGGATTTAGATACTCAAAGATTGAAAAGAATCAACTACGAA	6.45967	1.39633
CR_03770C_A-T_840493_840642_150	CR_03770C_A	RPS30	Ca22chrRA_C_albicans_SC5314	-	AGG	840493-840642	RQKWISQKNLCLRNDIKSIIKSAHTFKQSLNVIWLSRPKQILKDFKHGLY	AGGCAAAAATGGATCAGCCAAAAGAACCTCTGTTTAAGAAATGACATCAAATCAATCATTAAATCTGCTCACACTTTTAAACAAAGCTTAAATGTTATTTGGTTATCACGTCCAAAACAAATATTAAAAGATTTTAAACATGGGTTATAC	1.58033	2.22667
CR_03770C_A-T_840708_840788_81	CR_03770C_A	RPS30	Ca22chrRA_C_albicans_SC5314	-	TTG	840708-840788	LNWNYQIMREQGHTSKSDSIKISIRQE	TTGAATTGGAATTATCAAATAATGAGAGAGCAGGGGCATACATCGAAGTCAGATAGCATCAAAATATCAATACGACAAGAA	0.443	3.01967
CR_03770C_A-T_840647_840757_111	CR_03770C_A	RPS30	Ca22chrRA_C_albicans_SC5314	-	AGG	840647-840757	RGIHRSQIASKYQYDKNNISLGFRYSKIEKNQLRMIN	AGGGGCATACATCGAAGTCAGATAGCATCAAAATATCAATACGACAAGAATAATATTAGTCTGGGATTTAGATACTCAAAGATTGAAAAGAATCAACTACGAATGATAAAC	4.339	1.99833
CR_03790C_A-T_844528_844647_120	CR_03790C_A	KRE1	Ca22chrRA_C_albicans_SC5314	-	ATA	844528-844647	IHHFPPPFTSSFSHRSIYPENFHFFIIGFYFTTPNIAYTF	ATACATCATTTCCCTCCCCCCTTTACAAGTTCCTTTTCCCATAGATCTATATATCCTGAGAACTTTCACTTTTTTATTATTGGATTCTACTTCACAACACCTAATATTGCATATACTTTC	3.70067	2.06033
CR_03790C_A-T_844503_844643_141	CR_03790C_A	KRE1	Ca22chrRA_C_albicans_SC5314	-	ATC	844503-844643	IISLPPLQVPFPIDLYILRTFTFLLLDSTSQHLILHILSKLNKTSLN	ATCATTTCCCTCCCCCCTTTACAAGTTCCTTTTCCCATAGATCTATATATCCTGAGAACTTTCACTTTTTTATTATTGGATTCTACTTCACAACACCTAATATTGCATATACTTTCTAAATTAAACAAAACTTCCCTGAAC	1.17233	2.42133
CR_04020C_A-T_906305_906424_120	CR_04020C_A	CR_04020C_A	Ca22chrRA_C_albicans_SC5314	-	ATA	906305-906424	ITAILIALTMASHQIKETYLEVPQRLIHQPTSTTTITTLI	ATAACAGCAATATTAATAGCACTAACAATGGCGTCTCACCAAATAAAAGAAACTTATTTGGAAGTGCCACAGCGGCTAATACATCAACCAACATCAACAACAACAATAACAACTCTAATA	9.69733	45.021
CR_04020C_A-T_905984_906049_66	CR_04020C_A	CR_04020C_A	Ca22chrRA_C_albicans_SC5314	-	ATC	905984-906049	IHWRKYAVPLGYLISMEQEKSV	ATCCATTGGAGGAAATACGCCGTGCCTTTAGGTTATTTGATATCGATGGAACAGGAAAAATCAGTG	33.6513	39.777
CR_04060C_A-T_913874_913969_96	CR_04060C_A	DAP1	Ca22chrRA_C_albicans_SC5314	-	CTG	913874-913969	LTYFLKTLFSYSVFFFFFPFTINTLLLLFYIN	CTGACATATTTTTTGAAGACTTTATTTTCATATTCAGTTTTCTTTTTTTTTTTTCCTTTTACCATTAATACACTATTACTATTGTTTTATATCAAC	0	8.55633
CR_04060C_A-T_914005_914067_63	CR_04060C_A	DAP1	Ca22chrRA_C_albicans_SC5314	-	ATA	914005-914067	IIKTNINKQEKVLVVQVYKPH	ATAATAAAAACCAACATTAACAAGCAGGAGAAAGTGTTAGTCGTACAAGTATATAAACCACAC	0	4.78333
CR_04060C_A-T_913905_914021_117	CR_04060C_A	DAP1	Ca22chrRA_C_albicans_SC5314	-	AAG	913905-914021	KYINHTKSLPFTFIFQYPDIFFEDFIFIFSFLFFFSFYH	AAGTATATAAACCACACTAAATCACTTCCGTTCACTTTTATTTTTCAATACCCTGACATATTTTTTGAAGACTTTATTTTCATATTCAGTTTTCTTTTTTTTTTTTCCTTTTACCAT	1.79067	18.3507
CR_04090C_A-T_919619_919684_66	CR_04090C_A	ADE17	Ca22chrRA_C_albicans_SC5314	-	TTG	919619-919684	LSFPSNSLVDFHHVPFTPPSLK	TTGTCCTTCCCCAGCAATTCACTTGTCGATTTTCATCACGTTCCGTTCACCCCCCCTTCTTTGAAA	48.8253	43.7027
CR_04090C_A-T_919624_919734_111	CR_04090C_A	ADE17	Ca22chrRA_C_albicans_SC5314	-	ATT	919624-919734	IDYHYRVFNNWSNYFFFCPSPAIHLSIFITFRSPPLL	ATTGATTACCATTATCGAGTTTTTAATAATTGGAGTAATTACTTTTTTTTTTGTCCTTCCCCAGCAATTCACTTGTCGATTTTCATCACGTTCCGTTCACCCCCCCTTCTT	26.3063	26.9537
CR_04260W_A-T_953712_953780_69	CR_04260W_A	SNP3	Ca22chrRA_C_albicans_SC5314	+	AAG	953712-953780	KLEEILDTNHPLSLYLHIHIYIH	AAGCTTGAAGAAATATTAGACACAAATCATCCGCTATCTTTATATCTACACATTCATATATACATACAT	1.31867	5.70067
CR_04270C_A-T_954772_954831_60	CR_04270C_A	CR_04270C_A	Ca22chrRA_C_albicans_SC5314	-	ATG	954772-954831	MAYEHRIHKTEQKKKKKKKR	ATGGCTTACGAGCATCGAATCCATAAAACAGAACAAAAAAAAAAAAAAAAAAAAAAAAGA	3.84467	1.35033
CR_04660C_A-T_1017913_1018047_135	CR_04660C_A	UGP1	Ca22chrRA_C_albicans_SC5314	-	ATT	1017913-1018047	IISIDSKWQLQEKDMQNHNQHMYVLLYRERNTFCYFFFWFTPYLG	ATTATTTCAATTGATTCAAAATGGCAACTACAGGAAAAAGACATGCAAAATCACAATCAACATATGTATGTATTATTATACCGTGAACGCAACACTTTTTGTTATTTTTTTTTTTGGTTCACCCCCTATCTGGGA	18.319	16.1217
CR_04660C_A-T_1017888_1018064_177	CR_04660C_A	UGP1	Ca22chrRA_C_albicans_SC5314	-	ATC	1017888-1018064	IFQNTALFQLIQNGNYRKKTCKITINICMYYYTVNATLFVIFFFGSPPIWDEQFVVAIP	ATCTTTCAAAACACTGCATTATTTCAATTGATTCAAAATGGCAACTACAGGAAAAAGACATGCAAAATCACAATCAACATATGTATGTATTATTATACCGTGAACGCAACACTTTTTGTTATTTTTTTTTTTGGTTCACCCCCTATCTGGGATGAACAATTTGTTGTTGCTATTCCC	13.972	12.8407
CR_04660C_A-T_1017965_1018027_63	CR_04660C_A	UGP1	Ca22chrRA_C_albicans_SC5314	-	ATG	1017965-1018027	MATTGKRHAKSQSTYVCIIIP	ATGGCAACTACAGGAAAAAGACATGCAAAATCACAATCAACATATGTATGTATTATTATACCG	37.9433	29.9587
CR_04780W_A-T_1035919_1036026_108	CR_04780W_A	RPB8	Ca22chrRA_C_albicans_SC5314	+	TTG	1035919-1036026	LDIKYFSLESSFNLIRHIYYYYYHLSPFPPNYTTID	TTGGATATTAAGTACTTTTCATTAGAAAGTTCATTCAACTTAATTAGACACATCTACTACTACTACTACCACCTTTCTCCTTTCCCTCCCAATTACACAACTATAGAT	0.919333	2.868
CR_05050W_A-T_1095394_1095477_84	CR_05050W_A	GLN1	Ca22chrRA_C_albicans_SC5314	+	ATA	1095394-1095477	ISPKSTRTFIQLDVSLDYLLNNYNNTYI	ATATCTCCCAAGTCAACAAGGACTTTTATACAATTAGACGTTAGTCTTGACTATTTACTTAACAACTACAACAACACATATATA	23.6147	21.6543
CR_05300C_A-T_1141444_1141533_90	CR_05300C_A	MNN21	Ca22chrRA_C_albicans_SC5314	-	ATT	1141444-1141533	ILIFKIFCFSPIHFFSLSLVGNKHKPSLLP	ATTCTAATTTTCAAAATTTTTTGTTTTTCCCCAATACATTTTTTCTCTTTATCATTAGTTGGAAATAAACACAAACCAAGTTTACTGCCA	6.195	4.737
CR_05330W_A-T_1147084_1147263_180	CR_05330W_A	CR_05330W_A	Ca22chrRA_C_albicans_SC5314	+	TTG	1147084-1147263	LLFVWVDSIPQLPLPPKLEKDFFSSSHHNNHLRDESTYFNFPLCVENTTRLTGIPHYFNW	TTGTTGTTTGTTTGGGTTGATTCCATTCCACAACTTCCACTCCCCCCTAAATTGGAAAAAGATTTTTTTTCTTCTTCACACCATAACAACCACTTAAGAGACGAGTCTACTTATTTTAATTTTCCTCTGTGTGTTGAAAATACAACAAGACTGACTGGTATTCCCCATTATTTTAATTGG	30.5153	24.5697
CR_05330W_A-T_1147336_1147455_120	CR_05330W_A	CR_05330W_A	Ca22chrRA_C_albicans_SC5314	+	ATT	1147336-1147455	IYPVHSFKLTIYFFYLYISSVTLLLFYFLLPPPFVLYLLF	ATTTACCCAGTCCACTCCTTTAAACTAACGATTTATTTTTTTTATTTATACATATCAAGTGTTACATTACTATTGTTTTATTTCCTCCTTCCTCCCCCGTTTGTATTATATTTATTATTT	3.75667	6.68467
CR_05330W_A-T_1147070_1147177_108	CR_05330W_A	CR_05330W_A	Ca22chrRA_C_albicans_SC5314	+	TTG	1147070-1147177	LVYNICCLFGLIPFHNFHSPLNWKKIFFLLHTITTT	TTGGTGTATAACATTTGTTGTTTGTTTGGGTTGATTCCATTCCACAACTTCCACTCCCCCCTAAATTGGAAAAAGATTTTTTTTCTTCTTCACACCATAACAACCACT	30.178	8.76967
CR_05330W_A-T_1147238_1147360_123	CR_05330W_A	CR_05330W_A	Ca22chrRA_C_albicans_SC5314	+	CTG	1147238-1147360	LVFPIILIGEHFNRHYKKNHKYHSTSPRNSNQVFTQSTPLN	CTGGTATTCCCCATTATTTTAATTGGTGAACATTTCAATCGTCATTATAAGAAGAATCACAAGTATCATTCTACTAGTCCTAGAAACTCCAACCAAGTATTTACCCAGTCCACTCCTTTAAAC	13.4837	20.555
CR_05330W_A-T_1147370_1147465_96	CR_05330W_A	CR_05330W_A	Ca22chrRA_C_albicans_SC5314	+	ATT	1147370-1147465	IFFIYTYQVLHYYCFISSFLPRLYYIYYFKMY	ATTTTTTTTATTTATACATATCAAGTGTTACATTACTATTGTTTTATTTCCTCCTTCCTCCCCCGTTTGTATTATATTTATTATTTTAAAATGTAC	3.461	7.12033
CR_05330W_A-T_1147020_1147100_81	CR_05330W_A	CR_05330W_A	Ca22chrRA_C_albicans_SC5314	+	ATT	1147020-1147100	ILINWLLLQITFHFLSIWCITFVVCLG	ATTTTAATAAATTGGTTGTTGTTACAGATAACGTTCCATTTCCTTAGTATTTGGTGTATAACATTTGTTGTTTGTTTGGGT	7.09567	11.0153
CR_05330W_A-T_1147260_1147355_96	CR_05330W_A	CR_05330W_A	Ca22chrRA_C_albicans_SC5314	+	TTG	1147260-1147355	LVNISIVIIRRITSIILLVLETPTKYLPSPLL	TTGGTGAACATTTCAATCGTCATTATAAGAAGAATCACAAGTATCATTCTACTAGTCCTAGAAACTCCAACCAAGTATTTACCCAGTCCACTCCTT	5.39333	7.17967
CR_05330W_A-T_1147383_1147526_144	CR_05330W_A	CR_05330W_A	Ca22chrRA_C_albicans_SC5314	+	ATA	1147383-1147526	IHIKCYITIVLFPPSSPVCIIFIILKCTRNYVQFSSIGHRFIVFIISG	ATACATATCAAGTGTTACATTACTATTGTTTTATTTCCTCCTTCCTCCCCCGTTTGTATTATATTTATTATTTTAAAATGTACTAGAAACTACGTTCAGTTTTCTAGTATAGGTCACAGGTTTATTGTCTTTATTATATCAGGT	2.30733	5.93067
CR_05890C_A-T_1236676_1236735_60	CR_05890C_A	CR_05890C_A	Ca22chrRA_C_albicans_SC5314	-	TTG	1236676-1236735	LLSDIENGTKKIGPSRIKHV	TTGCTAAGCGACATTGAAAACGGAACGAAGAAAATAGGACCATCAAGAATAAAACACGTT	3.31033	15.1483
CR_05890C_A-T_1236605_1236700_96	CR_05890C_A	CR_05890C_A	Ca22chrRA_C_albicans_SC5314	-	AGG	1236605-1236700	RTIKNKTRLESQFSVSILKNYIFLSSFTITYT	AGGACCATCAAGAATAAAACACGTTTAGAAAGTCAATTTTCAGTTTCAATTCTAAAAAATTATATTTTTCTTTCAAGTTTCACAATAACATATACG	0.574	7.09633
CR_06000W_A-T_1274023_1274130_108	CR_06000W_A	SOK1	Ca22chrRA_C_albicans_SC5314	+	ATA	1274023-1274130	ISTLVFIILLFIHSITPANFIEAKFYSLFTITHFLI	ATATCTACTTTAGTTTTCATCATTTTACTATTTATCCATTCAATAACACCGGCTAATTTTATTGAAGCTAAGTTTTACTCACTATTCACTATTACCCACTTTCTAATA	0	1.162
CR_06000W_B-T_1273861_1273992_132	CR_06000W_B	CR_06000W_B	Ca22chrRB_C_albicans_SC5314	+	ATT	1273861-1273992	IFFLSFFFSFFYKNYLKLSNKSITSLNIYFSFHHFTIYPFNNTS	ATTTTCTTTCTTTCTTTCTTTTTTTCCTTTTTTTATAAAAACTATTTAAAATTATCCAACAAATCAATCACATCACTTAATATCTACTTTAGTTTTCATCATTTTACTATTTATCCATTCAATAACACCAGC	3.40733	0
CR_06040W_A-T_1290284_1290349_66	CR_06040W_A	CR_06040W_A	Ca22chrRA_C_albicans_SC5314	+	AAG	1290284-1290349	KTRKKGKKPHKKEEEEKVAAPT	AAGACAAGAAAAAAAGGAAAAAAGCCCCACAAGAAGGAAGAAGAAGAAAAAGTGGCAGCGCCTACT	2.04833	6.68167
CR_06040W_A-T_1290165_1290251_87	CR_06040W_A	CR_06040W_A	Ca22chrRA_C_albicans_SC5314	+	TTG	1290165-1290251	LFNHNFFGLLRLYLLLIQKQHYSSCQKGN	TTGTTTAACCACAATTTTTTTGGTTTATTGAGATTATATCTACTACTGATCCAAAAGCAACATTATTCCTCCTGTCAAAAGGGTAAC	29.8113	16.6787
CR_06040W_A-T_1290267_1290356_90	CR_06040W_A	CR_06040W_A	Ca22chrRA_C_albicans_SC5314	+	ATT	1290267-1290356	ISKDKTRQEKKEKSPTRRKKKKKWQRLLSL	ATTAGTAAAGACAAGACAAGACAAGAAAAAAAGGAAAAAAGCCCCACAAGAAGGAAGAAGAAGAAAAAGTGGCAGCGCCTACTTAGCTTA	1.90067	5.88233
CR_06040W_A-T_1290226_1290375_150	CR_06040W_A	CR_06040W_A	Ca22chrRA_C_albicans_SC5314	+	ATT	1290226-1290375	IIPPVKRVTDSQDRLVKTRQDKKKRKKAPQEGRRRKSGSAYLAYSKEVEF	ATTATTCCTCCTGTCAAAAGGGTAACTGATTCACAGGACAGATTAGTAAAGACAAGACAAGACAAGAAAAAAAGGAAAAAAGCCCCACAAGAAGGAAGAAGAAGAAAAAGTGGCAGCGCCTACTTAGCTTATAGCAAAGAAGTTGAATTC	19.1657	13.6973
CR_06180W_A-T_1322796_1322858_63	CR_06180W_A	ARC40	Ca22chrRA_C_albicans_SC5314	+	ATC	1322796-1322858	INKVSISREPLLITSTNIHIS	ATCAATAAAGTTTCAATCAGTAGAGAGCCCCTCCTGATTACATCCACAAATATACATATAAGT	1.007	10.0663
CR_06520C_A-T_1392001_1392102_102	CR_06520C_A	CR_06520C_A	Ca22chrRA_C_albicans_SC5314	-	ATT	1392001-1392102	ILFEILYYYQYSHIITYINILRVGFRNIFLLDLI	ATTCTATTTGAGATACTTTACTACTACCAATACAGTCACATAATTACATATATAAATATATTAAGAGTGGGTTTTCGGAACATTTTCCTCCTAGATTTAATA	0.27	1.734
CR_06520C_A-T_1391900_1392073_174	CR_06520C_A	CR_06520C_A	Ca22chrRA_C_albicans_SC5314	-	ATA	1391900-1392073	IQSHNYIYKYIKSGFSEHFPPRFNIESLSPNFFCINIYLKTSTPPTPNPNISPFFFCI	ATACAGTCACATAATTACATATATAAATATATTAAGAGTGGGTTTTCGGAACATTTTCCTCCTAGATTTAATATAGAATCCCTTTCCCCTAATTTTTTTTGCATCAACATTTACTTAAAAACTTCAACCCCACCAACTCCTAACCCTAATATTTCCCCTTTCTTTTTTTGCATA	2.60167	2.08433
CR_06570C_A-T_1403938_1404036_99	CR_06570C_A	CR_06570C_A	Ca22chrRA_C_albicans_SC5314	-	ATG	1403938-1404036	MMNMISLMDMKMIKSHFSKIVLNLLINVIIHKD	ATGATGAATATGATAAGTTTGATGGACATGAAGATGATCAAATCCCATTTTTCCAAGATTGTTTTGAATTTATTGATAAATGTAATAATTCACAAGGAT	34.0667	7.65967
CR_06570C_A-T_1404120_1404356_237	CR_06570C_A	CR_06570C_A	Ca22chrRA_C_albicans_SC5314	-	ATG	1404120-1404356	MTVILTTNGVENIDLKSLLLKLPSEIIDLIFSYVNLGKLRQLEEILESSSSSSLECLIQQYVLKHLYYSVKIGSLIFTD	ATGACGGTAATATTAACAACCAATGGTGTTGAAAATATTGATTTGAAATCATTATTATTAAAATTGCCATCAGAAATCATTGATTTAATATTCAGTTATGTTAATCTTGGTAAATTACGACAATTGGAAGAAATATTAGAATCATCTTCTTCTTCTTCTTTAGAATGTTTGATTCAACAATATGTATTGAAACATTTATATTATTCAGTTAAAATTGGTAGTCTTATATTCACTGAT	0.116333	7.644
CR_06760C_A-T_1452967_1453065_99	CR_06760C_A	LSC2	Ca22chrRA_C_albicans_SC5314	-	CTG	1452967-1453065	LILHIHNLYIFQQCCQDHLPVFQEYVNFQFEFP	CTGATATTACATATTCATAATCTATATATTTTTCAACAATGTTGTCAAGATCATTTGCCCGTATTTCAAGAGTATGTCAATTTTCAATTTGAATTTCCG	10.9963	20.7437
CR_06760C_A-T_1452834_1453055_222	CR_06760C_A	LSC2	Ca22chrRA_C_albicans_SC5314	-	ATA	1452834-1453055	IFIIYIFFNNVVKIICPYFKSMSIFNLNFRDSGEEGDREKKRVLFQNEKRRNRYTHTSGRNQPPICCHCKESLK	ATATTCATAATCTATATATTTTTCAACAATGTTGTCAAGATCATTTGCCCGTATTTCAAGAGTATGTCAATTTTCAATTTGAATTTCCGTGATTCGGGTGAAGAAGGGGACAGAGAAAAAAAACGAGTACTTTTTCAAAATGAGAAGAGGAGAAACAGATACACACATACCTCGGGGCGAAATCAACCACCAATTTGTTGCCATTGCAAGGAATCATTAAAG	5.06533	10.0347
CR_06760C_A-T_1452977_1453042_66	CR_06760C_A	LSC2	Ca22chrRA_C_albicans_SC5314	-	ATA	1452977-1453042	IYFSTMLSRSFARISRVCQFSI	ATATATTTTTCAACAATGTTGTCAAGATCATTTGCCCGTATTTCAAGAGTATGTCAATTTTCAATT	16.4943	30.161
CR_06830C_A-T_1464346_1464429_84	CR_06830C_A	SIW14	Ca22chrRA_C_albicans_SC5314	-	ATC	1464346-1464429	INILGLGIALVKLIFNSSHSPPFLRLHN	ATCAACATTTTGGGACTTGGCATAGCATTAGTGAAACTTATTTTCAACTCCTCACACTCTCCCCCCTTCCTCCGCCTTCACAAC	0.328	4.205
CR_07020W_A-T_1510427_1510489_63	CR_07020W_A	CR_07020W_A	Ca22chrRA_C_albicans_SC5314	+	ACG	1510427-1510489	TKSPNLPPLQLVYNLHCSSQN	ACGAAATCCCCAAACCTACCCCCCCTCCAATTGGTATATAACTTGCACTGTTCAAGTCAAAAT	13.6187	6.529
CR_07020W_A-T_1510496_1510558_63	CR_07020W_A	CR_07020W_A	Ca22chrRA_C_albicans_SC5314	+	TTG	1510496-1510558	LDYTIHSRVHIYRPTYPIKYF	TTGGATTATACAATACATTCACGTGTACATATATATAGACCCACCTATCCAATCAAATACTTT	33.9773	5.41933
CR_07100W_A-T_1547495_1547584_90	CR_07100W_A	FLC2	Ca22chrRA_C_albicans_SC5314	+	ATA	1547495-1547584	IYIFSITFSISYTTLSRRNHTSYLINIIIT	ATATATATATTTAGTATCACATTTTCAATTAGCTATACAACATTATCAAGACGCAACCACACATCTTATCTTATCAACATCATCATAACC	3.85867	0.658667
CR_07100W_A-T_1547690_1547797_108	CR_07100W_A	FLC2	Ca22chrRA_C_albicans_SC5314	+	ATT	1547690-1547797	IYTTFTHSPPYILHPLSSLLRFRFNSNSGVFCSNFD	ATTTATACAACATTCACACACTCACCCCCCTACATCCTTCATCCTTTATCTTCATTACTTAGATTTAGATTTAACTCAAATTCAGGTGTATTTTGCTCTAATTTTGAT	24.5833	3.30833
CR_07100W_A-T_1547499_1547579_81	CR_07100W_A	FLC2	Ca22chrRA_C_albicans_SC5314	+	ATA	1547499-1547579	IYLVSHFQLAIQHYQDATTHLILSTSS	ATATATTTAGTATCACATTTTCAATTAGCTATACAACATTATCAAGACGCAACCACACATCTTATCTTATCAACATCATCA	4.28767	0.732
CR_07100W_A-T_1547592_1547822_231	CR_07100W_A	FLC2	Ca22chrRA_C_albicans_SC5314	+	ATT	1547592-1547822	IPFFPSFFISIFTYCFFQIRISDSLLQDTNTYLFIQHSHTHPPTSFILYLHYLDLDLTQIQVYFALILIKFRVHFFG	ATTCCCTTCTTTCCTTCTTTTTTTATTTCCATTTTCACATATTGCTTCTTTCAAATTCGTATTTCAGATTCTTTATTACAAGATACTAATACTTATTTATTTATACAACATTCACACACTCACCCCCCTACATCCTTCATCCTTTATCTTCATTACTTAGATTTAGATTTAACTCAAATTCAGGTGTATTTTGCTCTAATTTTGATTAAATTTAGAGTTCATTTTTTTGGG	11.8513	1.643
CR_07100W_A-T_1547536_1547748_213	CR_07100W_A	FLC2	Ca22chrRA_C_albicans_SC5314	+	ATT	1547536-1547748	IIKTQPHILSYQHHHNLNTFPSFLLFLFPFSHIASFKFVFQILYYKILILIYLYNIHTLTPLHPSSFIFIT	ATTATCAAGACGCAACCACACATCTTATCTTATCAACATCATCATAACCTAAATACATTCCCTTCTTTCCTTCTTTTTTTATTTCCATTTTCACATATTGCTTCTTTCAAATTCGTATTTCAGATTCTTTATTACAAGATACTAATACTTATTTATTTATACAACATTCACACACTCACCCCCCTACATCCTTCATCCTTTATCTTCATTACT	14.315	1.921
CR_07360W_A-T_1600019_1600135_117	CR_07360W_A	PIF1	Ca22chrRA_C_albicans_SC5314	+	GTG	1600019-1600135	VLPRQSNQIFLPISGNRTNIEIVACGNHSINNKRKIYSH	GTGCTGCCACGGCAATCAAATCAAATATTTTTACCAATCAGTGGCAATAGAACAAACATAGAGATAGTAGCTTGCGGCAACCATAGTATCAATAACAAGAGGAAAATATACTCTCAT	8.25133	2.711
CR_07360W_A-T_1599975_1600076_102	CR_07360W_A	PIF1	Ca22chrRA_C_albicans_SC5314	+	ATC	1599975-1600076	ITIHFTIFNYIHQTLCCHGNQIKYFYQSVAIEQT	ATCACAATACATTTTACAATTTTCAACTATATACACCAAACACTGTGCTGCCACGGCAATCAAATCAAATATTTTTACCAATCAGTGGCAATAGAACAAACA	10.8157	3.831
CR_07360W_A-T_1599985_1600065_81	CR_07360W_A	PIF1	Ca22chrRA_C_albicans_SC5314	+	ATT	1599985-1600065	ILQFSTIYTKHCAATAIKSNIFTNQWQ	ATTTTACAATTTTCAACTATATACACCAAACACTGTGCTGCCACGGCAATCAAATCAAATATTTTTACCAATCAGTGGCAA	2.72133	4.55
CR_07450C_B-T_1616653_1616769_117	CR_07450C_B	CR_07450C_B	Ca22chrRB_C_albicans_SC5314	-	GTG	1616653-1616769	VKTNIKIYGTPFIYITVNHSYNFYTPKKLINIFAILFKI	GTGAAAACAAATATAAAAATATATGGAACACCTTTTATATACATCACTGTGAATCATTCCTACAACTTCTATACTCCAAAAAAATTAATCAATATCTTTGCCATCCTATTTAAAATT	1.98567	0.755667
CR_07520C_A-T_1628646_1628753_108	CR_07520C_A	YPT31	Ca22chrRA_C_albicans_SC5314	-	ATT	1628646-1628753	IEKKKRDITQKFRLNKYLISEIPLFFSKKDVQYKLI	ATTGAAAAAAAAAAGAGAGACATAACTCAAAAATTTAGATTGAATAAATACTTAATAAGTGAAATACCCCTTTTTTTTTCAAAGAAAGACGTACAATATAAACTAATT	10.41	6.86233
CR_07520C_B-T_1628025_1628150_126	CR_07520C_B	CR_07520C_B	Ca22chrRB_C_albicans_SC5314	-	AGG	1628025-1628150	RGSKTTLKKKKRDITQKFRLNKYLISEIPLFFSKKDVQYKLI	AGGGGAAGTAAAACTACATTGAAAAAAAAAAAGAGAGACATAACTCAAAAATTTAGATTGAATAAATACTTAATAAGTGAAATACCCCTTTTTTTTTCAAAGAAAGACGTACAATATAAACTAATT	3.23733	2.66733
CR_07630C_A-T_1657772_1657882_111	CR_07630C_A	RPS27	Ca22chrRA_C_albicans_SC5314	-	ATT	1657772-1657882	ISVFELYILEKQVSNGMFIRFTMSYGGIFLDDQNIII	ATTTCAGTTTTTGAATTATACATATTAGAGAAACAAGTTAGCAATGGTATGTTCATTAGATTTACCATGAGTTATGGAGGGATATTCTTGGATGATCAGAATATCATAATA	69.067	19.1793
CR_07630C_B-T_1657170_1657280_111	CR_07630C_B	CR_07630C_B	Ca22chrRB_C_albicans_SC5314	-	ATT	1657170-1657280	ISVFELYILEKQVNNGMFIRFTMSYGGIFLDDQNIMT	ATTTCAGTTTTTGAATTATACATATTAGAGAAACAAGTTAACAATGGTATGTTCATTAGATTTACCATGAGTTATGGAGGAATATTCCTGGATGATCAGAATATCATGACA	78.4213	11.7753
CR_07640C_A-T_1659113_1659223_111	CR_07640C_A	CR_07640C_A	Ca22chrRA_C_albicans_SC5314	-	ATA	1659113-1659223	ISWRLLLTISLTQLVLKKRIRKTQVYNNCPPLVSTSD	ATATCGTGGAGGCTACTTCTCACCATTTCTTTGACACAGTTAGTCTTGAAGAAGAGGATAAGAAAGACACAAGTCTACAATAACTGCCCGCCACTAGTATCTACTAGTGAT	0	1.07267
CR_07640C_A-T_1659348_1659452_105	CR_07640C_A	CR_07640C_A	Ca22chrRA_C_albicans_SC5314	-	ATC	1659348-1659452	IHGDPIHGLNSTKIKSTDQLSLLTKKKRRNRTATF	ATCCACGGAGACCCAATACATGGTTTGAATAGCACGAAAATAAAATCAACAGACCAATTGAGCTTACTAACTAAGAAGAAACGAAGAAATAGGACAGCAACTTTT	3.262	0.211667
CR_07700W_A-T_1670179_1670271_93	CR_07700W_A	CR_07700W_A	Ca22chrRA_C_albicans_SC5314	+	TTG	1670179-1670271	LDVKDEVMSVSIYPCVLFLILQVSKEEEGSG	TTGGATGTAAAAGATGAGGTTATGAGTGTGAGCATTTATCCGTGCGTTTTGTTTCTAATCCTGCAAGTAAGCAAAGAGGAGGAAGGGTCAGGT	0.385667	1.86733
CR_07700W_A-T_1670220_1670288_69	CR_07700W_A	CR_07700W_A	Ca22chrRA_C_albicans_SC5314	+	GTG	1670220-1670288	VRFVSNPASKQRGGRVRLIARKH	GTGCGTTTTGTTTCTAATCCTGCAAGTAAGCAAAGAGGAGGAAGGGTCAGGTTGATTGCTAGGAAACAT	0	1.604
CR_07700W_B-T_1669577_1669687_111	CR_07700W_B	CR_07700W_B	Ca22chrRB_C_albicans_SC5314	+	TTG	1669577-1669687	LDVKDEVMSVSIYPCVLFPILQISKEEEGVRLIARKH	TTGGATGTAAAAGATGAGGTTATGAGTGTGAGCATTTATCCGTGCGTTTTGTTTCCAATCCTGCAAATAAGCAAAGAGGAGGAAGGGGTCAGGTTGATTGCTAGGAAACAT	0	0.939333
CR_07700W_B-T_1669618_1669677_60	CR_07700W_B	CR_07700W_B	Ca22chrRB_C_albicans_SC5314	+	GTG	1669618-1669677	VRFVSNPANKQRGGRGQVDC	GTGCGTTTTGTTTCCAATCCTGCAAATAAGCAAAGAGGAGGAAGGGGTCAGGTTGATTGC	0	1.676
CR_07890W_A-T_1722643_1722756_114	CR_07890W_A	EFG1	Ca22chrRA_C_albicans_SC5314	+	CTG	1722643-1722756	LLFQPIALPIYSRCILSIIHRAIHIRLFQVSFNPFLFE	CTGCTATTTCAACCAATTGCCCTACCCATCTACTCGCGTTGTATATTATCAATAATACATCGAGCGATTCACATAAGGTTATTTCAAGTCTCATTCAACCCTTTTCTTTTTGAA	7.512	1.88533
CR_07890W_A-T_1723060_1723254_195	CR_07890W_A	EFG1	Ca22chrRA_C_albicans_SC5314	+	ATT	1723060-1723254	ILFFCFCFFAFFLVNPFVSLAYFYIGNIHTLTFTLNTLTLFTIFVVKIHVFIEYSFITFNLYSKS	ATTTTATTTTTTTGTTTTTGTTTTTTCGCTTTTTTTTTGGTTAACCCCTTTGTGTCCCTTGCATACTTTTACATTGGAAACATACATACACTAACATTCACACTCAATACACTCACATTATTTACCATTTTTGTTGTGAAGATACACGTATTTATTGAGTATTCCTTCATAACATTTAATTTATATTCCAAGAGT	2.75367	2.85833
CR_07890W_A-T_1723258_1723344_87	CR_07890W_A	EFG1	Ca22chrRA_C_albicans_SC5314	+	TTG	1723258-1723344	LIKQLGPRIHYQACFIKFLFLISLFCLPH	TTGATTAAACAACTTGGTCCAAGAATTCATTACCAGGCGTGTTTTATTAAATTCCTTTTTTTAATTAGCCTTTTTTGCCTCCCACAT	1.26667	4.819
CR_07890W_A-T_1722374_1722505_132	CR_07890W_A	EFG1	Ca22chrRA_C_albicans_SC5314	+	ATC	1722374-1722505	IYQIDLVGINNNRFEYNKNRIGFYFHKYYYFILFKVFPSNFNLI	ATCTATCAAATAGACTTGGTTGGTATTAATAACAATAGATTTGAATATAATAAAAATAGAATAGGATTTTATTTTCACAAATATTATTATTTCATCCTGTTTAAAGTCTTTCCGAGTAATTTCAATCTTATT	7.522	3.16833
CR_07890W_A-T_1722578_1722694_117	CR_07890W_A	EFG1	Ca22chrRA_C_albicans_SC5314	+	AAG	1722578-1722694	KSGKKLDLLDQKRIQVVSFAFSCYFNQLPYPSTRVVYYQ	AAGTCTGGAAAGAAATTAGATTTATTAGATCAGAAGAGAATTCAAGTCGTTTCTTTTGCATTTAGCTGCTATTTCAACCAATTGCCCTACCCATCTACTCGCGTTGTATATTATCAA	16.7767	6.696
CR_07890W_A-T_1722728_1722844_117	CR_07890W_A	EFG1	Ca22chrRA_C_albicans_SC5314	+	AAG	1722728-1722844	KSHSTLFFLNKTSLNYNCYQTDTVKKLAENKRSYHYSLH	AAGTCTCATTCAACCCTTTTCTTTTTGAATAAAACAAGCTTAAATTATAATTGCTACCAAACTGACACAGTCAAAAAGTTAGCAGAGAACAAAAGAAGCTACCATTATTCATTGCAC	1.933	17.217
CR_07890W_A-T_1723001_1723150_150	CR_07890W_A	EFG1	Ca22chrRA_C_albicans_SC5314	+	AAG	1723001-1723150	KQTNDQIILNLRSQSIKEIEFYFFVFVFSLFFWLTPLCPLHTFTLETYIH	AAGCAAACAAACGACCAAATTATACTAAATTTAAGAAGCCAGAGTATTAAAGAAATAGAATTTTATTTTTTTGTTTTTGTTTTTTCGCTTTTTTTTTGGTTAACCCCTTTGTGTCCCTTGCATACTTTTACATTGGAAACATACATACAC	9.48833	4.82767
CR_07890W_A-T_1722444_1722593_150	CR_07890W_A	EFG1	Ca22chrRA_C_albicans_SC5314	+	ATT	1722444-1722593	IFTNIIISSCLKSFRVISILFNYPIIPTLIPSFPFLLISLLLLLKSLERN	ATTTTCACAAATATTATTATTTCATCCTGTTTAAAGTCTTTCCGAGTAATTTCAATCTTATTTAACTATCCAATTATCCCAACTTTAATTCCTTCCTTTCCTTTTTTACTTATTTCCCTTCTTCTTTTGCTCAAAAGTCTGGAAAGAAAT	20.444	5.223
CR_07890W_A-T_1722606_1722752_147	CR_07890W_A	EFG1	Ca22chrRA_C_albicans_SC5314	+	ATC	1722606-1722752	IRREFKSFLLHLAAISTNCPTHLLALYIINNTSSDSHKVISSLIQPFSF	ATCAGAAGAGAATTCAAGTCGTTTCTTTTGCATTTAGCTGCTATTTCAACCAATTGCCCTACCCATCTACTCGCGTTGTATATTATCAATAATACATCGAGCGATTCACATAAGGTTATTTCAAGTCTCATTCAACCCTTTTCTTTT	5.82567	3.277
CR_07890W_A-T_1723122_1723214_93	CR_07890W_A	EFG1	Ca22chrRA_C_albicans_SC5314	+	ATA	1723122-1723214	ILLHWKHTYTNIHTQYTHIIYHFCCEDTRIY	ATACTTTTACATTGGAAACATACATACACTAACATTCACACTCAATACACTCACATTATTTACCATTTTTGTTGTGAAGATACACGTATTTAT	1.77767	3.762
CR_07890W_A-T_1723332_1723445_114	CR_07890W_A	EFG1	Ca22chrRA_C_albicans_SC5314	+	TTG	1723332-1723445	LPPTLVAQVTLFNIFLFFSYLLKKKKKNNQPTLNPLTN	TTGCCTCCCACATTAGTTGCTCAGGTCACGTTATTTAATATATTTCTTTTTTTTTCTTACTTGCTGAAAAAAAAAAAAAAAAACAACCAACCAACCCTTAACCCATTAACGAAT	4.96667	1.59267
CR_07890W_B-T_1722394_1722552_159	CR_07890W_B	CR_07890W_B	Ca22chrRB_C_albicans_SC5314	+	TTG	1722394-1722552	LKRQAKNDQIIQNLRSQNIKEIEFYFFVFVFSLFFWLTPLCPLHTFTLETYIH	TTGAAGAGACAAGCAAAAAACGACCAAATTATACAAAATTTAAGAAGCCAGAATATTAAAGAAATAGAATTTTATTTTTTTGTTTTTGTTTTTTCGCTTTTTTTTTGGTTAACCCCTTTGTGTCCCTTGCATACTTTTACATTGGAAACATACATACAC	4.19967	1.891
CR_08160W_A-T_1773459_1773572_114	CR_08160W_A	PTC5	Ca22chrRA_C_albicans_SC5314	+	ATT	1773459-1773572	INRNISLRGELVGHILIIGPLVFFFCLIYYLLRVLDGR	ATTAATAGAAATATATCATTGAGAGGTGAATTAGTGGGACATATTTTAATAATTGGTCCTTTGGTTTTTTTTTTTTGCCTTATATATTATTTGTTGAGAGTCCTTGACGGTCGT	2.521	3.23733
CR_08160W_A-T_1773488_1773562_75	CR_08160W_A	PTC5	Ca22chrRA_C_albicans_SC5314	+	ATT	1773488-1773562	ISGTYFNNWSFGFFFLPYILFVESP	ATTAGTGGGACATATTTTAATAATTGGTCCTTTGGTTTTTTTTTTTTGCCTTATATATTATTTGTTGAGAGTCCT	0	4.17967
CR_08650C_A-T_1863979_1864056_78	CR_08650C_A	CR_08650C_A	Ca22chrRA_C_albicans_SC5314	-	GTG	1863979-1864056	VVVLAPQSMTSMSIFLWPSLSRRWSM	GTGGTAGTTTTGGCACCGCAATCGATGACGAGCATGAGTATTTTCCTTTGGCCAAGTTTATCTCGTCGTTGGTCGATG	2.35767	5.09233
CR_08650C_A-T_1863861_1863923_63	CR_08650C_A	CR_08650C_A	Ca22chrRA_C_albicans_SC5314	-	ATT	1863861-1863923	IRSNKQILLFNLWTSMSCDG	ATTAGGAGCAATAAGCAAATACTGTTGTTCAATCTATGGACTAGCATGTCTTGTGATGGCKKC	0	7.516
CR_09120C_A-T_1946731_1946844_114	CR_09120C_A	TUB1	Ca22chrRA_C_albicans_SC5314	-	AAG	1946731-1946844	KSSVLMVCLSDCLPFQNRHQFFFWGWIENTKIRFFWLS	AAGTCATCAGTATTAATGGTATGTCTTAGTGATTGTTTACCGTTTCAAAATCGCCATCAGTTTTTTTTTTGGGGATGGATTGAAAACACTAAGATCCGGTTTTTTTGGTTGTCT	22.4883	15.6577
CR_09120C_A-T_1946819_1946896_78	CR_09120C_A	TUB1	Ca22chrRA_C_albicans_SC5314	-	ATA	1946819-1946896	IETTTHIFIDNIIQKMREVISINGMS	ATAGAAACAACTACACATATTTTTATCGATAATATAATTCAAAAAATGAGAGAAGTCATCAGTATTAATGGTATGTCT	51.575	33.58
CR_09160C_A-T_1952646_1952708_63	CR_09160C_A	ERG13	Ca22chrRA_C_albicans_SC5314	-	AAG	1952646-1952708	KVFKKLPSSFVFLPSIYSNQI	AAGGTTTTTAAGAAGCTTCCCTCCTCATTTGTTTTCCTTCCAAGCATATATTCCAATCAGATC	41.94	38.4373
CR_09180W_A-T_1957423_1957572_150	CR_09180W_A	CDG1	Ca22chrRA_C_albicans_SC5314	+	ATT	1957423-1957572	ITQDYSRPITSISPYNSNNFVQEKKRRQTNKGILLQFFFPQILYLHIKYK	ATTACACAAGACTATTCTAGACCTATCACAAGCATTTCACCCTATAATTCAAACAATTTTGTGCAAGAAAAAAAAAGAAGACAAACAAACAAAGGAATATTGTTACAGTTTTTTTTTCCCCAAATCTTGTATCTTCATATCAAATATAAA	2.16833	1.115
CR_09180W_A-T_1957376_1957591_216	CR_09180W_A	CDG1	Ca22chrRA_C_albicans_SC5314	+	ATT	1957376-1957591	IQWFMIPCMITPTNDILHKTILDLSQAFHPIIQTILCKKKKEDKQTKEYCYSFFFPKSCIFISNINRRHISR	ATTCAATGGTTTATGATACCTTGCATGATAACTCCTACTAATGATATATTACACAAGACTATTCTAGACCTATCACAAGCATTTCACCCTATAATTCAAACAATTTTGTGCAAGAAAAAAAAAGAAGACAAACAAACAAAGGAATATTGTTACAGTTTTTTTTTCCCCAAATCTTGTATCTTCATATCAAATATAAATAGACGTCATATTTCCCGA	12.4687	1.272
CR_09620C_A-T_2048173_2048262_90	CR_09620C_A	CR_09620C_A	Ca22chrRA_C_albicans_SC5314	-	GTG	2048173-2048262	VDYFPPPPPIEEVKHHNKYFFFSLLPPTLL	GTGGACTATTTCCCTCCCCCTCCCCCCATAGAAGAAGTTAAACATCACAACAAATACTTTTTTTTTTCCCTCCTTCCCCCCACTCTTCTA	5.67867	8.44267
CR_09620C_A-T_2048169_2048231_63	CR_09620C_A	CR_09620C_A	Ca22chrRA_C_albicans_SC5314	-	AAG	2048169-2048231	KKLNITTNTFFFPSFPPLFYN	AAGAAGTTAAACATCACAACAAATACTTTTTTTTTTCCCTCCTTCCCCCCACTCTTCTATAAT	9.994	23.343
CR_09620C_A-T_2048225_2048326_102	CR_09620C_A	CR_09620C_A	Ca22chrRA_C_albicans_SC5314	-	GTG	2048225-2048326	VNQSYHIISYHIPNYIYTYTLSGLFPSPSPHRRS	GTGAATCAATCTTATCATATCATATCATATCATATCCCTAATTACATCTATACCTACACTTTAAGTGGACTATTTCCCTCCCCCTCCCCCCATAGAAGAAGT	5.34967	7.57967
CR_09700W_A-T_2063040_2063186_147	CR_09700W_A	CR_09700W_A	Ca22chrRA_C_albicans_SC5314	+	ATT	2063040-2063186	ILCLYAKGEREREREREREEGGADRTVLTLFHSSPNPNKLTDRIIFILF	ATTCTTTGCTTATATGCAAAGGGGGAAAGAGAGAGAGAGAGAGAGAGAGAGAGAGAGGAGGGGGGGGCTGACCGAACAGTTCTAACATTGTTTCATTCCTCACCAAATCCTAACAAGTTGACAGACAGAATTATTTTTATATTATTT	205.023	127.579
CR_09700W_A-T_2062969_2063121_153	CR_09700W_A	CR_09700W_A	Ca22chrRA_C_albicans_SC5314	+	ATT	2062969-2063121	IINPSLQNLAHLMLWHNETSFNFSFFAYMQRGKERERERERERRGGLTEQF	ATTATTAACCCATCACTACAGAACCTGGCCCATTTGATGCTTTGGCATAATGAAACCTCGTTTAATTTTTCATTCTTTGCTTATATGCAAAGGGGGAAAGAGAGAGAGAGAGAGAGAGAGAGAGAGAGGAGGGGGGGGCTGACCGAACAGTTC	196.983	122.625
CR_09700W_A-T_2063015_2063107_93	CR_09700W_A	CR_09700W_A	Ca22chrRA_C_albicans_SC5314	+	ATA	2063015-2063107	IMKPRLIFHSLLICKGGKRERERERERGGGG	ATAATGAAACCTCGTTTAATTTTTCATTCTTTGCTTATATGCAAAGGGGGAAAGAGAGAGAGAGAGAGAGAGAGAGAGAGAGGAGGGGGGGGC	324.069	201.458
CR_10010C_A-T_2146270_2146341_72	CR_10010C_A	MSS51	Ca22chrRA_C_albicans_SC5314	-	ATA	2146270-2146341	IVRFVQVSKIANFYCFFFFIYSLF	ATAGTACGATTTGTTCAAGTGTCAAAGATAGCAAATTTTTATTGTTTCTTCTTTTTTATATACAGCTTGTTT	1.26367	2.68333
CR_10010C_A-T_2146226_2146348_123	CR_10010C_A	MSS51	Ca22chrRA_C_albicans_SC5314	-	ATA	2146226-2146348	ILDSTICSSVKDSKFLLFLLFYIQLVLISGSFYTNLLISLF	ATATTAGATAGTACGATTTGTTCAAGTGTCAAAGATAGCAAATTTTTATTGTTTCTTCTTTTTTATATACAGCTTGTTTTAATTTCAGGATCATTTTACACTAACCTACTCATCAGCCTATTT	1.03133	2.65133
CR_10140W_A-T_2165689_2165823_135	CR_10140W_A	CR_10140W_A	Ca22chrRA_C_albicans_SC5314	+	ATC	2165689-2165823	IIINNNSFFVITTYYSPLSHNIFYQKYFNPPNFPTTPLLQITINK	ATCATCATCAACAACAACTCCTTCTTTGTAATTACAACATACTATTCTCCCTTATCCCATAACATATTCTATCAAAAATACTTTAACCCACCTAATTTTCCCACGACTCCCTTATTACAAATCACTATCAATAAA	18.3137	28.047
CR_10160W_A-T_2172087_2172284_198	CR_10160W_A	FAA4	Ca22chrRA_C_albicans_SC5314	+	AAG	2172087-2172284	KSIDILIFSFFFTQQSFEKKKIVINFFFCIFIKTTATANFLRKISKPIQLFFFGPILIYPTCDLNL	AAGTCAATTGATATTTTGATTTTTTCCTTTTTTTTTACCCAACAAAGTTTTGAGAAGAAGAAGATTGTCATTAATTTTTTTTTTTGCATTTTCATCAAAACAACAGCAACAGCAAACTTCCTAAGAAAAATTTCAAAACCAATTCAACTTTTTTTTTTTGGGCCAATTCTAATATATCCAACCTGTGATTTAAATTTG	15.5593	8.50033
CR_10160W_A-T_2172136_2172207_72	CR_10160W_A	FAA4	Ca22chrRA_C_albicans_SC5314	+	TTG	2172136-2172207	LRRRRLSLIFFFAFSSKQQQQQTS	TTGAGAAGAAGAAGATTGTCATTAATTTTTTTTTTTGCATTTTCATCAAAACAACAGCAACAGCAAACTTCC	25.505	12.3687
CR_10160W_A-T_2172322_2172390_69	CR_10160W_A	FAA4	Ca22chrRA_C_albicans_SC5314	+	TTG	2172322-2172390	LYPFLPSSFFTTRQQVLNHIYLF	TTGTATCCCTTTTTGCCCTCCTCGTTTTTCACTACCCGACAGCAAGTTTTAAATCATATTTATTTATTT	2.35867	8.20967
CR_10160W_A-T_2171963_2172094_132	CR_10160W_A	FAA4	Ca22chrRA_C_albicans_SC5314	+	ATA	2171963-2172094	ITTNIFPVPFFLLNSYFILQILIIKNFICYSFPYCHPYPCLKVN	ATAACAACAAATATCTTTCCTGTTCCTTTCTTTTTACTCAATTCTTATTTCATTCTTCAGATTTTGATTATTAAGAATTTTATTTGTTATTCCTTTCCCTATTGCCACCCTTACCCTTGTTTGAAAGTCAAT	4.79833	4.585
CR_10160W_A-T_2172170_2172271_102	CR_10160W_A	FAA4	Ca22chrRA_C_albicans_SC5314	+	TTG	2172170-2172271	LHFHQNNSNSKLPKKNFKTNSTFFFWANSNISNL	TTGCATTTTCATCAAAACAACAGCAACAGCAAACTTCCTAAGAAAAATTTCAAAACCAATTCAACTTTTTTTTTTTGGGCCAATTCTAATATATCCAACCTG	25.564	9.02133
CR_10160W_A-T_2172287_2172370_84	CR_10160W_A	FAA4	Ca22chrRA_C_albicans_SC5314	+	ATT	2172287-2172370	IDNNLLERNSTLCIPFCPPRFSLPDSKF	ATTGATAATAATTTGTTGGAGAGAAATTCTACCCTTTGTATCCCTTTTTGCCCTCCTCGTTTTTCACTACCCGACAGCAAGTTT	1.93733	7.14033
CR_10250C_A-T_2187674_2187745_72	CR_10250C_A	FDH3	Ca22chrRA_C_albicans_SC5314	-	TTG	2187674-2187745	LFIFIINYIYKLISLQCLNLLLER	TTGTTCATTTTTATAATCAATTATATTTATAAATTAATATCACTACAATGTCTGAATCTACTGTTGGAAAGG	125.574	66.0133
CR_10340W_A-T_2206268_2206417_150	CR_10340W_A	PTP3	Ca22chrRA_C_albicans_SC5314	+	ATA	2206268-2206417	IFFFINNLHLNLSTLFKQFFISFHIFPVIHLFFYYSKFRTIPIIFTTHIH	ATATTTTTCTTCATTAATAACTTACATCTAAACTTATCAACCTTATTCAAACAGTTTTTTATTTCATTTCACATTTTCCCCGTTATTCATCTATTTTTTTATTATTCAAAATTCAGAACTATACCGATTATATTCACAACACATATTCAT	6.98	15.0093
CR_10340W_A-T_2206421_2206480_60	CR_10340W_A	PTP3	Ca22chrRA_C_albicans_SC5314	+	CTG	2206421-2206480	LLTIFSVFCFILGCLLCFSL	CTGTTGACGATTTTTTCCGTTTTTTGCTTCATCTTGGGTTGCTTGCTGTGTTTTTCATTA	8.00467	6.39767
CR_10340W_A-T_2206484_2206570_87	CR_10340W_A	PTP3	Ca22chrRA_C_albicans_SC5314	+	CTG	2206484-2206570	LQFTHIHLDLHRFSFFAIPSCSWFLTSCF	CTGCAATTTACGCATATTCACCTTGATCTACACAGATTTTCCTTTTTTGCCATCCCCTCTTGTTCTTGGTTTTTAACTTCTTGCTTT	45.175	118.669
CR_10340W_A-T_2206625_2206723_99	CR_10340W_A	PTP3	Ca22chrRA_C_albicans_SC5314	+	ATA	2206625-2206723	ILGPSLNFGILLQTNLTSCCQPTKWKVETKREN	ATACTTGGTCCATCGTTAAACTTTGGAATCTTACTTCAAACCAACTTGACGAGCTGCTGCCAACCAACAAAGTGGAAGGTTGAAACGAAACGAGAAAAT	91.8457	76.4077
CR_10340W_A-T_2206356_2206424_69	CR_10340W_A	PTP3	Ca22chrRA_C_albicans_SC5314	+	ATC	2206356-2206424	IYFFIIQNSELYRLYSQHIFINC	ATCTATTTTTTTATTATTCAAAATTCAGAACTATACCGATTATATTCACAACACATATTCATTAACTGT	15.174	31.8773
CR_10340W_A-T_2206497_2206556_60	CR_10340W_A	PTP3	Ca22chrRA_C_albicans_SC5314	+	ATA	2206497-2206556	IFTLIYTDFPFLPSPLVLGF	ATATTCACCTTGATCTACACAGATTTTCCTTTTTTGCCATCCCCTCTTGTTCTTGGTTTT	58.9357	170.897
CR_10340W_A-T_2206578_2206640_63	CR_10340W_A	PTP3	Ca22chrRA_C_albicans_SC5314	+	ATA	2206578-2206640	ISFRLQTQHSIGNRQVYLVHR	ATATCGTTTAGACTACAAACACAACATTCAATCGGAAACAGACAAGTATACTTGGTCCATCGT	39.725	7.63867
CR_10340W_A-T_2206701_2206769_69	CR_10340W_A	PTP3	Ca22chrRA_C_albicans_SC5314	+	AGG	2206701-2206769	RLKRNEKIKKNTQQKFSPTPVIV	AGGTTGAAACGAAACGAGAAAATTAAAAAAAACACACAACAAAAGTTCAGTCCCACACCAGTAATAGTT	119.107	41.7983
CR_10340W_A-T_2206303_2206506_204	CR_10340W_A	PTP3	Ca22chrRA_C_albicans_SC5314	+	ATC	2206303-2206506	INLIQTVFYFISHFPRYSSIFLLFKIQNYTDYIHNTYSLTVDDFFRFLLHLGLLAVFFIIAAIYAYSP	ATCAACCTTATTCAAACAGTTTTTTATTTCATTTCACATTTTCCCCGTTATTCATCTATTTTTTTATTATTCAAAATTCAGAACTATACCGATTATATTCACAACACATATTCATTAACTGTTGACGATTTTTTCCGTTTTTTGCTTCATCTTGGGTTGCTTGCTGTGTTTTTCATTATAGCTGCAATTTACGCATATTCACCT	23.539	40.5273
CR_10340W_A-T_2206519_2206704_186	CR_10340W_A	PTP3	Ca22chrRA_C_albicans_SC5314	+	ATT	2206519-2206704	IFLFCHPLLFLVFNFLLLEGYRLDYKHNIQSETDKYTWSIVKLWNLTSNQLDELLPTNKVEG	ATTTTCCTTTTTTGCCATCCCCTCTTGTTCTTGGTTTTTAACTTCTTGCTTTTAGAGGGATATCGTTTAGACTACAAACACAACATTCAATCGGAAACAGACAAGTATACTTGGTCCATCGTTAAACTTTGGAATCTTACTTCAAACCAACTTGACGAGCTGCTGCCAACCAACAAAGTGGAAGGT	57.187	37.7523
CR_10350C_A-T_2210515_2210574_60	CR_10350C_A	TRX1	Ca22chrRA_C_albicans_SC5314	-	ATA	2210515-2210574	IFPCFFTNKIDINSIQPFNT	ATATTCCCTTGTTTTTTCACCAACAAAATAGATATCAATTCTATTCAACCCTTTAACACT	32.5583	49.647
CR_10360C_A-T_2213617_2213685_69	CR_10360C_A	CTM1	Ca22chrRA_C_albicans_SC5314	-	ATC	2213617-2213685	ILHSNLYLLLPQIVLQPLNLPYS	ATCCTACATTCAAACCTATACTTATTATTACCACAAATAGTGTTGCAACCACTGAATCTACCCTATTCC	1.59733	4.65767
CR_10360C_A-T_2213543_2213668_126	CR_10360C_A	CTM1	Ca22chrRA_C_albicans_SC5314	-	ATA	2213543-2213668	ILIITTNSVATTESTLFLIHYHRTVGLIIFVAFVFLLVCCQN	ATACTTATTATTACCACAAATAGTGTTGCAACCACTGAATCTACCCTATTCCTAATCCATTATCATCGGACAGTAGGACTTATTATATTTGTGGCTTTTGTTTTTCTACTTGTTTGTTGTCAAAAC	1.59667	3.40367
CR_10490W_A-T_2230024_2230125_102	CR_10490W_A	EIF4E	Ca22chrRA_C_albicans_SC5314	+	ATT	2230024-2230125	ISVVVSHQRLIEKIVKKNKKINGKTRNQNFHKYC	ATTAGCGTTGTTGTTTCCCATCAGCGTTTAATAGAAAAAATAGTCAAAAAAAATAAAAAAATTAACGGAAAGACCAGAAACCAGAACTTCCACAAATATTGT	7.404	68.0257
CR_10490W_A-T_2230076_2230141_66	CR_10490W_A	EIF4E	Ca22chrRA_C_albicans_SC5314	+	ATA	2230076-2230141	IKKLTERPETRTSTNIVDQIVK	ATAAAAAAATTAACGGAAAGACCAGAAACCAGAACTTCCACAAATATTGTTGATCAAATAGTAAAG	12.146	104.569
